# Supplementary material for: Identification and Characterization of Transcription Factors Involved in Geraniol Biosynthesis in Rosa chinensis
Source: Int J Mol Sci. 2022 Nov 24;23(23):14684. doi: 10.3390/ijms232314684 (PMC9739587; doi:10.3390/ijms232314684)
Supplement: Supplementary file 1 [file ijms-23-14684-s001.zip]

Archive with 19 entries (19 files):
- Figure S1.tif
- Figure S2.tif
- Figure S3.tif
- Figure S4.tif
- Figure S5.tif
- Figure S6.tiff
- Figure S7.tif
- ijms-2003504-SI.pdf
- Table S1.xlsx
- Table S10.xlsx
- Table S11.xlsx
- Table S2.xlsx
- Table S3.xlsx
- Table S4.xlsx
- Table S5.xlsx
- Table S6.xlsx
- Table S7.xlsx
- Table S8.xlsx
- Table S9.xlsx
