# Supplementary material for: Identification and Characterization of Transcription Factors Involved in Geraniol Biosynthesis in Rosa chinensis
Source: Int J Mol Sci. 2022 Nov 24;23(23):14684. doi: 10.3390/ijms232314684 (PMC9739587; doi:10.3390/ijms232314684)
Supplement: Supplementary file 1 [file ijms-23-14684-s001.zip › Table S1.xlsx]

## Sheet: Table S1
Table S1: The OPLS-DA, PCA and PLS-DA parameters model for all detected compounds.
OPLSDA_vali_parameters
	pre	R2X	R2Y	Q2
OBL vs OB	1+1+0	0.529	0.988	0.959
PCA_vali_parameters
	pre	R2X
OBL vs OB	2	0.559
PLSDA_vali_parameters
	pre	R2X	R2Y	Q2
OBL vs OB	2	0.529	0.988	0.961
