# Supplementary material for: Identification and Characterization of Transcription Factors Involved in Geraniol Biosynthesis in Rosa chinensis
Source: Int J Mol Sci. 2022 Nov 24;23(23):14684. doi: 10.3390/ijms232314684 (PMC9739587; doi:10.3390/ijms232314684)
Supplement: Supplementary file 1 [file ijms-23-14684-s001.zip › Table S2.xlsx]

## Sheet: Table S2
Table S2: The PLS-DA variable importance in projection scores of 67 compounds.
Name	VIP
Furan, 2-ethyl-	0.641554
Cyclotetrasiloxane, octamethyl-	0.967586
Hexanal	1.33821
.beta.-Myrcene	1.06442
Heptanal	0.973372
D-Limonene	0.94795
Cyclopentasiloxane, decamethyl-	0.70281
2-Hexenal, (E)-	1.45673
Furan, 2-pentyl-	0.379785
1,3,6-Octatriene, 3,7-dimethyl-, (E)-	1.31709
3-Carene	1.51584
1-Pentanol	0.855431
Octanal	0.646121
cis-2-(2-Pentenyl)furan	0.95858
Tridecane	0.710141
2-Penten-1-ol, (Z)-	0.505843
3-Hexen-1-ol	1.47533
2,4-Hexadienal, (E,E)-	1.20621
2-Hexen-1-ol, (E)-	1.43834
.alpha.-Cubebene	1.25053
2,4-Heptadienal, (E,E)-	0.434808
Aciphyllene	0.555362
Ylangene	0.994772
Copaene	1.23058
2,6,10,10-Tetramethyl-1-oxa-spiro[4.5]dec-6-ene	1.4481
Pentadecane	0.604137
Benzaldehyde	0.5956
1H-Cycloprop[e]azulene, 1a,2,3,4,4a,5,6,7b-octahydro-1,1,4,7-tetramethyl-, [1aR-(1a.alpha.,4.alpha.,4a.beta.,7b.alpha.)]-	1.23538
1H-Cyclopenta[1,3]cyclopropa[1,2]benzene, octahydro-7-methyl-3-methylene-4-(1-methylethyl)-, [3aS-(3a.alpha.,3b.beta.,4.beta.,7.alpha.,7aS*)]-	0.932075
1,6-Octadien-3-ol, 3,7-dimethyl-	0.5964
Bicyclo[4.4.0]dec-1-ene, 2-isopropyl-5-methyl-9-methylene-	1.01258
2,6-Nonadienal, (E,Z)-	0.293757
1,6-Cyclodecadiene, 1-methyl-5-methylene-8-(1-methylethyl)-, [s-(E,E)]-	1.08519
Caryophyllene	0.896678
1H-Cycloprop[e]azulene, decahydro-1,1,7-trimethyl-4-methylene-	0.837305
Naphthalene, 1,2,3,4,4a,5,6,8a-octahydro-7-methyl-4-methylene-1-(1-methylethyl)-, (1.alpha.,4a.beta.,8a.alpha.)-	0.566968
1H-Cycloprop[e]azulene, decahydro-1,1,7-trimethyl-4-methylene-, [1aR-(1a.alpha.,4a.beta.,7.alpha.,7a.beta.,7b.alpha.)]-	1.07356
1-Naphthalenol, 1,2,3,4,4a,7,8,8a-octahydro-1,6-dimethyl-4-(1-methylethyl)-, [1S-(1.alpha.,4.alpha.,4a.beta.,8a.beta.)]-	0.00843095
1H-Cyclopropa[a]naphthalene, 1a,2,3,5,6,7,7a,7b-octahydro-1,1,7,7a-tetramethyl-, [1aR-(1a.alpha.,7.alpha.,7a.alpha.,7b.alpha.)]-	1.19677
Naphthalene, 1,2,3,4,4a,5,6,8a-octahydro-7-methyl-4-methylene-1-(1-methylethyl)-, (1.alpha.,4a.alpha.,8a.alpha.)-	1.12543
(+)-Epi-bicyclosesquiphellandrene	0.371161
Naphthalene, 1,2,3,4,4a,7-hexahydro-1,6-dimethyl-4-(1-methylethyl)-	0.125115
.alpha.-Muurolene	0.684358
2,6-Octadienal, 3,7-dimethyl-	1.37259
.gamma.-Elemene	1.28936
Naphthalene, 1,2,3,5,6,8a-hexahydro-4,7-dimethyl-1-(1-methylethyl)-, (1S-cis)-	0.882446
6-Octen-1-ol, 3,7-dimethyl-, (R)-	1.51363
1H-3a,7-Methanoazulene, 2,3,4,7,8,8a-hexahydro-3,6,8,8-tetramethyl-, [3R-(3.alpha.,3a.beta.,7.beta.,8a.alpha.)]-	1.38502
Naphthalene, 1,2,4a,5,6,8a-hexahydro-4,7-dimethyl-1-(1-methylethyl)-, [1S-(1.alpha.,4a.beta.,8a.alpha.)]-	0.994487
3-Octadecene, (E)-	1.22389
2-Butanone, 4-(2,6,6-trimethyl-1-cyclohexen-1-yl)-	1.00265
2,6-Octadien-1-ol, 3,7-dimethyl-, (E)-	1.53952
6,9-Heptadecadiene	0.335194
Benzyl Alcohol	1.05577
Nonadecane	0.905981
3-Eicosene, (E)-	0.135344
Z-5-Nonadecene	1.16052
Cadala-1(10),3,8-triene	1.04806
Eicosane	0.877706
1-Nonadecene	1.16535
Cyclododecene, (E)-	0.657127
Heneicosane	0.522058
9-Nonadecene	0.929905
Benzene, 1,3,5-trimethoxy-	1.02915
.alpha.-Cadinol	1.04754
Dimethyl phthalate	0.990716
9-Tricosene, (Z)-	1.04672
