# Supplementary material for: Identification and Characterization of Transcription Factors Involved in Geraniol Biosynthesis in Rosa chinensis
Source: Int J Mol Sci. 2022 Nov 24;23(23):14684. doi: 10.3390/ijms232314684 (PMC9739587; doi:10.3390/ijms232314684)
Supplement: Supplementary file 1 [file ijms-23-14684-s001.zip › Table S3.xlsx]

## Sheet: Table S3
Table S3: The correlation matrix information between 31 compounds.
Compound A	Compound B	Correlation	pvalue
3-Carene	2,6-Octadien-1-ol, 3,7-dimethyl-, (E)-	0.984916	1.28564e-13
6-Octen-1-ol, 3,7-dimethyl-, (R)-	2,6-Octadien-1-ol, 3,7-dimethyl-, (E)-	0.986784	4.4853e-14
3-Hexen-1-ol	2,6-Octadien-1-ol, 3,7-dimethyl-, (E)-	-0.933521	1.55508e-08
2-Hexenal, (E)-	2,6-Octadien-1-ol, 3,7-dimethyl-, (E)-	-0.946309	2.93213e-09
2,6,10,10-Tetramethyl-1-oxa-spiro[4.5]dec-6-e	2,6-Octadien-1-ol, 3,7-dimethyl-, (E)-	-0.919661	6.76666e-08
2-Hexen-1-ol, (E)-	2,6-Octadien-1-ol, 3,7-dimethyl-, (E)-	-0.905716	2.32761e-07
1H-3a,7-Methanoazulene, 2,3,4,7,8,8a-hexahydr	2,6-Octadien-1-ol, 3,7-dimethyl-, (E)-	0.871152	2.52991e-06
2,6-Octadienal, 3,7-dimethyl-	2,6-Octadien-1-ol, 3,7-dimethyl-, (E)-	0.891041	7.06034e-07
Hexanal	2,6-Octadien-1-ol, 3,7-dimethyl-, (E)-	-0.869267	2.82411e-06
1,3,6-Octatriene, 3,7-dimethyl-, (E)-	2,6-Octadien-1-ol, 3,7-dimethyl-, (E)-	0.86762	3.10475e-06
.gamma.-Elemene	2,6-Octadien-1-ol, 3,7-dimethyl-, (E)-	0.816785	3.52962e-05
.alpha.-Cubebene	2,6-Octadien-1-ol, 3,7-dimethyl-, (E)-	0.795101	8.02708e-05
1H-Cycloprop[e]azulene, 1a,2,3,4,4a,5,6,7b-oc	2,6-Octadien-1-ol, 3,7-dimethyl-, (E)-	0.795402	7.94135e-05
Copaene	2,6-Octadien-1-ol, 3,7-dimethyl-, (E)-	0.792683	8.7449e-05
3-Octadecene, (E)-	2,6-Octadien-1-ol, 3,7-dimethyl-, (E)-	0.816776	3.53088e-05
2,4-Hexadienal, (E,E)-	2,6-Octadien-1-ol, 3,7-dimethyl-, (E)-	-0.776018	0.000153356
1H-Cyclopropa[a]naphthalene, 1a,2,3,5,6,7,7a,	2,6-Octadien-1-ol, 3,7-dimethyl-, (E)-	0.732794	0.000541899
1-Nonadecene	2,6-Octadien-1-ol, 3,7-dimethyl-, (E)-	-0.701745	0.00117082
Z-5-Nonadecene	2,6-Octadien-1-ol, 3,7-dimethyl-, (E)-	0.758875	0.000260831
Naphthalene, 1,2,3,4,4a,5,6,8a-octahydro-7-me	2,6-Octadien-1-ol, 3,7-dimethyl-, (E)-	0.697952	0.00127811
1,6-Cyclodecadiene, 1-methyl-5-methylene-8-(1	2,6-Octadien-1-ol, 3,7-dimethyl-, (E)-	0.704725	0.00109189
1H-Cycloprop[e]azulene, decahydro-1,1,7-trime	2,6-Octadien-1-ol, 3,7-dimethyl-, (E)-	0.696558	0.00131952
.beta.-Myrcene	2,6-Octadien-1-ol, 3,7-dimethyl-, (E)-	0.667772	0.00245867
Benzyl Alcohol	2,6-Octadien-1-ol, 3,7-dimethyl-, (E)-	-0.650265	0.00348109
Cadala-1(10),3,8-triene	2,6-Octadien-1-ol, 3,7-dimethyl-, (E)-	0.697975	0.00127744
.alpha.-Cadinol	2,6-Octadien-1-ol, 3,7-dimethyl-, (E)-	0.690936	0.00149808
9-Tricosene, (Z)-	2,6-Octadien-1-ol, 3,7-dimethyl-, (E)-	0.692709	0.00143975
Benzene, 1,3,5-trimethoxy-	2,6-Octadien-1-ol, 3,7-dimethyl-, (E)-	-0.669554	0.00237028
Bicyclo[4.4.0]dec-1-ene, 2-isopropyl-5-methyl	2,6-Octadien-1-ol, 3,7-dimethyl-, (E)-	0.645217	0.00383325
2-Butanone, 4-(2,6,6-trimethyl-1-cyclohexen-1	2,6-Octadien-1-ol, 3,7-dimethyl-, (E)-	-0.600917	0.00835353
6-Octen-1-ol, 3,7-dimethyl-, (R)-	3-Carene	0.986426	5.55112e-14
3-Hexen-1-ol	3-Carene	-0.900109	3.62856e-07
2-Hexenal, (E)-	3-Carene	-0.952496	1.12302e-09
2,6,10,10-Tetramethyl-1-oxa-spiro[4.5]dec-6-e	3-Carene	-0.884503	1.10165e-06
2-Hexen-1-ol, (E)-	3-Carene	-0.864012	3.80449e-06
1H-3a,7-Methanoazulene, 2,3,4,7,8,8a-hexahydr	3-Carene	0.817836	3.38288e-05
2,6-Octadienal, 3,7-dimethyl-	3-Carene	0.825375	2.47408e-05
Hexanal	3-Carene	-0.834866	1.63313e-05
1,3,6-Octatriene, 3,7-dimethyl-, (E)-	3-Carene	0.875587	1.93972e-06
.gamma.-Elemene	3-Carene	0.79235	8.84782e-05
.alpha.-Cubebene	3-Carene	0.766226	0.000208825
1H-Cycloprop[e]azulene, 1a,2,3,4,4a,5,6,7b-oc	3-Carene	0.809841	4.64334e-05
Copaene	3-Carene	0.771364	0.000177923
3-Octadecene, (E)-	3-Carene	0.809859	4.64005e-05
2,4-Hexadienal, (E,E)-	3-Carene	-0.798153	7.19314e-05
1H-Cyclopropa[a]naphthalene, 1a,2,3,5,6,7,7a,	3-Carene	0.687039	0.00163324
1-Nonadecene	3-Carene	-0.661219	0.00280757
Z-5-Nonadecene	3-Carene	0.754627	0.000295575
Naphthalene, 1,2,3,4,4a,5,6,8a-octahydro-7-me	3-Carene	0.601411	0.00828628
1,6-Cyclodecadiene, 1-methyl-5-methylene-8-(1	3-Carene	0.627814	0.00527742
1H-Cycloprop[e]azulene, decahydro-1,1,7-trime	3-Carene	0.624604	0.00558666
.beta.-Myrcene	3-Carene	0.6858	0.00167826
Benzyl Alcohol	3-Carene	-0.62702	0.0053526
Cadala-1(10),3,8-triene	3-Carene	0.617683	0.0063038
.alpha.-Cadinol	3-Carene	0.676933	0.00203147
9-Tricosene, (Z)-	3-Carene	0.72169	0.00072197
Benzene, 1,3,5-trimethoxy-	3-Carene	-0.62181	0.00586771
Bicyclo[4.4.0]dec-1-ene, 2-isopropyl-5-methyl	3-Carene	0.542453	0.0200261
2-Butanone, 4-(2,6,6-trimethyl-1-cyclohexen-1	3-Carene	-0.574236	0.0126929
3-Hexen-1-ol	6-Octen-1-ol, 3,7-dimethyl-, (R)-	-0.899087	3.9234e-07
2-Hexenal, (E)-	6-Octen-1-ol, 3,7-dimethyl-, (R)-	-0.944579	3.75806e-09
2,6,10,10-Tetramethyl-1-oxa-spiro[4.5]dec-6-e	6-Octen-1-ol, 3,7-dimethyl-, (R)-	-0.875474	1.95308e-06
2-Hexen-1-ol, (E)-	6-Octen-1-ol, 3,7-dimethyl-, (R)-	-0.861619	4.3398e-06
1H-3a,7-Methanoazulene, 2,3,4,7,8,8a-hexahydr	6-Octen-1-ol, 3,7-dimethyl-, (R)-	0.833743	1.7177e-05
2,6-Octadienal, 3,7-dimethyl-	6-Octen-1-ol, 3,7-dimethyl-, (R)-	0.86546	3.50897e-06
Hexanal	6-Octen-1-ol, 3,7-dimethyl-, (R)-	-0.843766	1.07998e-05
1,3,6-Octatriene, 3,7-dimethyl-, (E)-	6-Octen-1-ol, 3,7-dimethyl-, (R)-	0.856278	5.77292e-06
.gamma.-Elemene	6-Octen-1-ol, 3,7-dimethyl-, (R)-	0.796403	7.6618e-05
.alpha.-Cubebene	6-Octen-1-ol, 3,7-dimethyl-, (R)-	0.782818	0.000122655
1H-Cycloprop[e]azulene, 1a,2,3,4,4a,5,6,7b-oc	6-Octen-1-ol, 3,7-dimethyl-, (R)-	0.792056	8.93948e-05
Copaene	6-Octen-1-ol, 3,7-dimethyl-, (R)-	0.789581	9.7449e-05
3-Octadecene, (E)-	6-Octen-1-ol, 3,7-dimethyl-, (R)-	0.816978	3.50228e-05
2,4-Hexadienal, (E,E)-	6-Octen-1-ol, 3,7-dimethyl-, (R)-	-0.782408	0.000124342
1H-Cyclopropa[a]naphthalene, 1a,2,3,5,6,7,7a,	6-Octen-1-ol, 3,7-dimethyl-, (R)-	0.692331	0.00145203
1-Nonadecene	6-Octen-1-ol, 3,7-dimethyl-, (R)-	-0.656269	0.00309727
Z-5-Nonadecene	6-Octen-1-ol, 3,7-dimethyl-, (R)-	0.757518	0.000271536
Naphthalene, 1,2,3,4,4a,5,6,8a-octahydro-7-me	6-Octen-1-ol, 3,7-dimethyl-, (R)-	0.635194	0.00461887
1,6-Cyclodecadiene, 1-methyl-5-methylene-8-(1	6-Octen-1-ol, 3,7-dimethyl-, (R)-	0.683252	0.00177411
1H-Cycloprop[e]azulene, decahydro-1,1,7-trime	6-Octen-1-ol, 3,7-dimethyl-, (R)-	0.698384	0.0012655
.beta.-Myrcene	6-Octen-1-ol, 3,7-dimethyl-, (R)-	0.698849	0.00125202
Benzyl Alcohol	6-Octen-1-ol, 3,7-dimethyl-, (R)-	-0.63444	0.00468288
Cadala-1(10),3,8-triene	6-Octen-1-ol, 3,7-dimethyl-, (R)-	0.649176	0.00355473
.alpha.-Cadinol	6-Octen-1-ol, 3,7-dimethyl-, (R)-	0.678296	0.00197352
9-Tricosene, (Z)-	6-Octen-1-ol, 3,7-dimethyl-, (R)-	0.711879	0.00092027
Benzene, 1,3,5-trimethoxy-	6-Octen-1-ol, 3,7-dimethyl-, (R)-	-0.642506	0.004034
Bicyclo[4.4.0]dec-1-ene, 2-isopropyl-5-methyl	6-Octen-1-ol, 3,7-dimethyl-, (R)-	0.610857	0.00708236
2-Butanone, 4-(2,6,6-trimethyl-1-cyclohexen-1	6-Octen-1-ol, 3,7-dimethyl-, (R)-	-0.555739	0.0166376
2-Hexenal, (E)-	3-Hexen-1-ol	0.88429	1.11723e-06
2,6,10,10-Tetramethyl-1-oxa-spiro[4.5]dec-6-e	3-Hexen-1-ol	0.92479	4.05799e-08
2-Hexen-1-ol, (E)-	3-Hexen-1-ol	0.972665	1.43867e-11
1H-3a,7-Methanoazulene, 2,3,4,7,8,8a-hexahydr	3-Hexen-1-ol	-0.913967	1.14903e-07
2,6-Octadienal, 3,7-dimethyl-	3-Hexen-1-ol	-0.866941	3.22733e-06
Hexanal	3-Hexen-1-ol	0.858152	5.2297e-06
1,3,6-Octatriene, 3,7-dimethyl-, (E)-	3-Hexen-1-ol	-0.799513	6.84575e-05
.gamma.-Elemene	3-Hexen-1-ol	-0.821472	2.91434e-05
.alpha.-Cubebene	3-Hexen-1-ol	-0.802838	6.0562e-05
1H-Cycloprop[e]azulene, 1a,2,3,4,4a,5,6,7b-oc	3-Hexen-1-ol	-0.788069	0.000102663
Copaene	3-Hexen-1-ol	-0.741203	0.000432053
3-Octadecene, (E)-	3-Hexen-1-ol	-0.759484	0.000256149
2,4-Hexadienal, (E,E)-	3-Hexen-1-ol	0.736387	0.000492408
1H-Cyclopropa[a]naphthalene, 1a,2,3,5,6,7,7a,	3-Hexen-1-ol	-0.752441	0.000314921
1-Nonadecene	3-Hexen-1-ol	0.775792	0.000154478
Z-5-Nonadecene	3-Hexen-1-ol	-0.730963	0.000568685
Naphthalene, 1,2,3,4,4a,5,6,8a-octahydro-7-me	3-Hexen-1-ol	-0.811154	4.41235e-05
1,6-Cyclodecadiene, 1-methyl-5-methylene-8-(1	3-Hexen-1-ol	-0.708257	0.00100412
1H-Cycloprop[e]azulene, decahydro-1,1,7-trime	3-Hexen-1-ol	-0.683391	0.00176878
.beta.-Myrcene	3-Hexen-1-ol	-0.606322	0.00764132
Benzyl Alcohol	3-Hexen-1-ol	0.699117	0.00124434
Cadala-1(10),3,8-triene	3-Hexen-1-ol	-0.710108	0.000960515
.alpha.-Cadinol	3-Hexen-1-ol	-0.632308	0.00486788
9-Tricosene, (Z)-	3-Hexen-1-ol	-0.618516	0.0062137
Benzene, 1,3,5-trimethoxy-	3-Hexen-1-ol	0.646928	0.00371078
Bicyclo[4.4.0]dec-1-ene, 2-isopropyl-5-methyl	3-Hexen-1-ol	-0.683793	0.00175341
2-Butanone, 4-(2,6,6-trimethyl-1-cyclohexen-1	3-Hexen-1-ol	0.635551	0.00458877
2,6,10,10-Tetramethyl-1-oxa-spiro[4.5]dec-6-e	2-Hexenal, (E)-	0.880542	1.42424e-06
2-Hexen-1-ol, (E)-	2-Hexenal, (E)-	0.853002	6.83902e-06
1H-3a,7-Methanoazulene, 2,3,4,7,8,8a-hexahydr	2-Hexenal, (E)-	-0.719391	0.000764885
2,6-Octadienal, 3,7-dimethyl-	2-Hexenal, (E)-	-0.799427	6.86721e-05
Hexanal	2-Hexenal, (E)-	0.934523	1.38161e-08
1,3,6-Octatriene, 3,7-dimethyl-, (E)-	2-Hexenal, (E)-	-0.85135	7.43773e-06
.gamma.-Elemene	2-Hexenal, (E)-	-0.675758	0.00208259
.alpha.-Cubebene	2-Hexenal, (E)-	-0.61785	0.00628561
1H-Cycloprop[e]azulene, 1a,2,3,4,4a,5,6,7b-oc	2-Hexenal, (E)-	-0.740164	0.000444516
Copaene	2-Hexenal, (E)-	-0.602996	0.00807358
3-Octadecene, (E)-	2-Hexenal, (E)-	-0.811092	4.42303e-05
2,4-Hexadienal, (E,E)-	2-Hexenal, (E)-	0.868919	2.88161e-06
1H-Cyclopropa[a]naphthalene, 1a,2,3,5,6,7,7a,	2-Hexenal, (E)-	-0.58436	0.0108739
1-Nonadecene	2-Hexenal, (E)-	0.653239	0.00328642
Z-5-Nonadecene	2-Hexenal, (E)-	-0.725182	0.000660629
Naphthalene, 1,2,3,4,4a,5,6,8a-octahydro-7-me	2-Hexenal, (E)-	-0.54476	0.0194017
1,6-Cyclodecadiene, 1-methyl-5-methylene-8-(1	2-Hexenal, (E)-	-0.535514	0.0219996
1H-Cycloprop[e]azulene, decahydro-1,1,7-trime	2-Hexenal, (E)-	-0.553441	0.0171886
.beta.-Myrcene	2-Hexenal, (E)-	-0.585348	0.0107083
Benzyl Alcohol	2-Hexenal, (E)-	0.751697	0.000321749
Cadala-1(10),3,8-triene	2-Hexenal, (E)-	-0.621555	0.00589394
.alpha.-Cadinol	2-Hexenal, (E)-	-0.644386	0.00389388
9-Tricosene, (Z)-	2-Hexenal, (E)-	-0.589078	0.0101009
Bicyclo[4.4.0]dec-1-ene, 2-isopropyl-5-methyl	2-Hexenal, (E)-	-0.471042	0.048482
2-Butanone, 4-(2,6,6-trimethyl-1-cyclohexen-1	2-Hexenal, (E)-	0.514082	0.0290705
2-Hexen-1-ol, (E)-	2,6,10,10-Tetramethyl-1-oxa-spiro[4.5]dec-6-e	0.90829	1.88098e-07
1H-3a,7-Methanoazulene, 2,3,4,7,8,8a-hexahydr	2,6,10,10-Tetramethyl-1-oxa-spiro[4.5]dec-6-e	-0.843186	1.11029e-05
2,6-Octadienal, 3,7-dimethyl-	2,6,10,10-Tetramethyl-1-oxa-spiro[4.5]dec-6-e	-0.83902	1.35062e-05
Hexanal	2,6,10,10-Tetramethyl-1-oxa-spiro[4.5]dec-6-e	0.864485	3.70569e-06
1,3,6-Octatriene, 3,7-dimethyl-, (E)-	2,6,10,10-Tetramethyl-1-oxa-spiro[4.5]dec-6-e	-0.773361	0.000167004
.gamma.-Elemene	2,6,10,10-Tetramethyl-1-oxa-spiro[4.5]dec-6-e	-0.759919	0.000252842
.alpha.-Cubebene	2,6,10,10-Tetramethyl-1-oxa-spiro[4.5]dec-6-e	-0.704965	0.00108572
1H-Cycloprop[e]azulene, 1a,2,3,4,4a,5,6,7b-oc	2,6,10,10-Tetramethyl-1-oxa-spiro[4.5]dec-6-e	-0.6968	0.00131225
Copaene	2,6,10,10-Tetramethyl-1-oxa-spiro[4.5]dec-6-e	-0.664248	0.00264159
3-Octadecene, (E)-	2,6,10,10-Tetramethyl-1-oxa-spiro[4.5]dec-6-e	-0.643515	0.00395835
2,4-Hexadienal, (E,E)-	2,6,10,10-Tetramethyl-1-oxa-spiro[4.5]dec-6-e	0.79575	7.84306e-05
1H-Cyclopropa[a]naphthalene, 1a,2,3,5,6,7,7a,	2,6,10,10-Tetramethyl-1-oxa-spiro[4.5]dec-6-e	-0.729168	0.000596011
1-Nonadecene	2,6,10,10-Tetramethyl-1-oxa-spiro[4.5]dec-6-e	0.827775	2.23268e-05
Z-5-Nonadecene	2,6,10,10-Tetramethyl-1-oxa-spiro[4.5]dec-6-e	-0.73362	0.000530172
Naphthalene, 1,2,3,4,4a,5,6,8a-octahydro-7-me	2,6,10,10-Tetramethyl-1-oxa-spiro[4.5]dec-6-e	-0.707955	0.00101137
1,6-Cyclodecadiene, 1-methyl-5-methylene-8-(1	2,6,10,10-Tetramethyl-1-oxa-spiro[4.5]dec-6-e	-0.578631	0.0118756
1H-Cycloprop[e]azulene, decahydro-1,1,7-trime	2,6,10,10-Tetramethyl-1-oxa-spiro[4.5]dec-6-e	-0.601302	0.00830114
.beta.-Myrcene	2,6,10,10-Tetramethyl-1-oxa-spiro[4.5]dec-6-e	-0.568623	0.0138014
Benzyl Alcohol	2,6,10,10-Tetramethyl-1-oxa-spiro[4.5]dec-6-e	0.796227	7.71043e-05
Cadala-1(10),3,8-triene	2,6,10,10-Tetramethyl-1-oxa-spiro[4.5]dec-6-e	-0.727033	0.000629936
.alpha.-Cadinol	2,6,10,10-Tetramethyl-1-oxa-spiro[4.5]dec-6-e	-0.604146	0.00792189
Benzene, 1,3,5-trimethoxy-	2,6,10,10-Tetramethyl-1-oxa-spiro[4.5]dec-6-e	0.551941	0.017556
Bicyclo[4.4.0]dec-1-ene, 2-isopropyl-5-methyl	2,6,10,10-Tetramethyl-1-oxa-spiro[4.5]dec-6-e	-0.617038	0.00637425
2-Butanone, 4-(2,6,6-trimethyl-1-cyclohexen-1	2,6,10,10-Tetramethyl-1-oxa-spiro[4.5]dec-6-e	0.717519	0.000801386
1H-3a,7-Methanoazulene, 2,3,4,7,8,8a-hexahydr	2-Hexen-1-ol, (E)-	-0.900612	3.49083e-07
2,6-Octadienal, 3,7-dimethyl-	2-Hexen-1-ol, (E)-	-0.833699	1.72111e-05
Hexanal	2-Hexen-1-ol, (E)-	0.833046	1.77201e-05
1,3,6-Octatriene, 3,7-dimethyl-, (E)-	2-Hexen-1-ol, (E)-	-0.753458	0.000305795
.gamma.-Elemene	2-Hexen-1-ol, (E)-	-0.829581	2.06454e-05
.alpha.-Cubebene	2-Hexen-1-ol, (E)-	-0.742803	0.00041343
1H-Cycloprop[e]azulene, 1a,2,3,4,4a,5,6,7b-oc	2-Hexen-1-ol, (E)-	-0.734284	0.000520883
Copaene	2-Hexen-1-ol, (E)-	-0.683066	0.00178127
3-Octadecene, (E)-	2-Hexen-1-ol, (E)-	-0.722584	0.000705829
2,4-Hexadienal, (E,E)-	2-Hexen-1-ol, (E)-	0.711387	0.000931319
1H-Cyclopropa[a]naphthalene, 1a,2,3,5,6,7,7a,	2-Hexen-1-ol, (E)-	-0.771826	0.000175343
1-Nonadecene	2-Hexen-1-ol, (E)-	0.804524	5.68648e-05
Z-5-Nonadecene	2-Hexen-1-ol, (E)-	-0.637522	0.00442558
Naphthalene, 1,2,3,4,4a,5,6,8a-octahydro-7-me	2-Hexen-1-ol, (E)-	-0.805155	5.55316e-05
1,6-Cyclodecadiene, 1-methyl-5-methylene-8-(1	2-Hexen-1-ol, (E)-	-0.635518	0.00459158
1H-Cycloprop[e]azulene, decahydro-1,1,7-trime	2-Hexen-1-ol, (E)-	-0.624263	0.00562039
.beta.-Myrcene	2-Hexen-1-ol, (E)-	-0.567457	0.0140409
Benzyl Alcohol	2-Hexen-1-ol, (E)-	0.695975	0.00133718
Cadala-1(10),3,8-triene	2-Hexen-1-ol, (E)-	-0.729877	0.00058509
.alpha.-Cadinol	2-Hexen-1-ol, (E)-	-0.597269	0.00886378
9-Tricosene, (Z)-	2-Hexen-1-ol, (E)-	-0.574451	0.012652
Benzene, 1,3,5-trimethoxy-	2-Hexen-1-ol, (E)-	0.620877	0.00596409
Bicyclo[4.4.0]dec-1-ene, 2-isopropyl-5-methyl	2-Hexen-1-ol, (E)-	-0.638159	0.00437388
2-Butanone, 4-(2,6,6-trimethyl-1-cyclohexen-1	2-Hexen-1-ol, (E)-	0.661806	0.00277478
2,6-Octadienal, 3,7-dimethyl-	1H-3a,7-Methanoazulene, 2,3,4,7,8,8a-hexahydr	0.867195	3.18101e-06
Hexanal	1H-3a,7-Methanoazulene, 2,3,4,7,8,8a-hexahydr	-0.690815	0.00150212
1,3,6-Octatriene, 3,7-dimethyl-, (E)-	1H-3a,7-Methanoazulene, 2,3,4,7,8,8a-hexahydr	0.698494	0.00126231
.gamma.-Elemene	1H-3a,7-Methanoazulene, 2,3,4,7,8,8a-hexahydr	0.922345	5.20087e-08
.alpha.-Cubebene	1H-3a,7-Methanoazulene, 2,3,4,7,8,8a-hexahydr	0.919821	6.6631e-08
1H-Cycloprop[e]azulene, 1a,2,3,4,4a,5,6,7b-oc	1H-3a,7-Methanoazulene, 2,3,4,7,8,8a-hexahydr	0.761333	0.000242352
Copaene	1H-3a,7-Methanoazulene, 2,3,4,7,8,8a-hexahydr	0.881555	1.33482e-06
3-Octadecene, (E)-	1H-3a,7-Methanoazulene, 2,3,4,7,8,8a-hexahydr	0.683612	0.00176032
2,4-Hexadienal, (E,E)-	1H-3a,7-Methanoazulene, 2,3,4,7,8,8a-hexahydr	-0.551797	0.0175915
1H-Cyclopropa[a]naphthalene, 1a,2,3,5,6,7,7a,	1H-3a,7-Methanoazulene, 2,3,4,7,8,8a-hexahydr	0.885704	1.01728e-06
1-Nonadecene	1H-3a,7-Methanoazulene, 2,3,4,7,8,8a-hexahydr	-0.777415	0.00014657
Z-5-Nonadecene	1H-3a,7-Methanoazulene, 2,3,4,7,8,8a-hexahydr	0.686745	0.00164385
Naphthalene, 1,2,3,4,4a,5,6,8a-octahydro-7-me	1H-3a,7-Methanoazulene, 2,3,4,7,8,8a-hexahydr	0.899606	3.77129e-07
1,6-Cyclodecadiene, 1-methyl-5-methylene-8-(1	1H-3a,7-Methanoazulene, 2,3,4,7,8,8a-hexahydr	0.826637	2.34447e-05
1H-Cycloprop[e]azulene, decahydro-1,1,7-trime	1H-3a,7-Methanoazulene, 2,3,4,7,8,8a-hexahydr	0.786792	0.000107251
.beta.-Myrcene	1H-3a,7-Methanoazulene, 2,3,4,7,8,8a-hexahydr	0.701399	0.00118029
Benzyl Alcohol	1H-3a,7-Methanoazulene, 2,3,4,7,8,8a-hexahydr	-0.514468	0.0289294
Cadala-1(10),3,8-triene	1H-3a,7-Methanoazulene, 2,3,4,7,8,8a-hexahydr	0.639855	0.00423861
.alpha.-Cadinol	1H-3a,7-Methanoazulene, 2,3,4,7,8,8a-hexahydr	0.634616	0.00466786
9-Tricosene, (Z)-	1H-3a,7-Methanoazulene, 2,3,4,7,8,8a-hexahydr	0.641061	0.00414449
Benzene, 1,3,5-trimethoxy-	1H-3a,7-Methanoazulene, 2,3,4,7,8,8a-hexahydr	-0.85089	7.61252e-06
Bicyclo[4.4.0]dec-1-ene, 2-isopropyl-5-methyl	1H-3a,7-Methanoazulene, 2,3,4,7,8,8a-hexahydr	0.825449	2.46631e-05
2-Butanone, 4-(2,6,6-trimethyl-1-cyclohexen-1	1H-3a,7-Methanoazulene, 2,3,4,7,8,8a-hexahydr	-0.623679	0.00567845
Hexanal	2,6-Octadienal, 3,7-dimethyl-	-0.799447	6.8623e-05
1,3,6-Octatriene, 3,7-dimethyl-, (E)-	2,6-Octadienal, 3,7-dimethyl-	0.854909	6.19967e-06
.gamma.-Elemene	2,6-Octadienal, 3,7-dimethyl-	0.706558	0.00104558
.alpha.-Cubebene	2,6-Octadienal, 3,7-dimethyl-	0.786565	0.000108083
1H-Cycloprop[e]azulene, 1a,2,3,4,4a,5,6,7b-oc	2,6-Octadienal, 3,7-dimethyl-	0.771408	0.000177677
Copaene	2,6-Octadienal, 3,7-dimethyl-	0.775758	0.000154651
3-Octadecene, (E)-	2,6-Octadienal, 3,7-dimethyl-	0.783838	0.000118532
2,4-Hexadienal, (E,E)-	2,6-Octadienal, 3,7-dimethyl-	-0.623487	0.00569772
1H-Cyclopropa[a]naphthalene, 1a,2,3,5,6,7,7a,	2,6-Octadienal, 3,7-dimethyl-	0.632177	0.0048794
1-Nonadecene	2,6-Octadienal, 3,7-dimethyl-	-0.590181	0.00992663
Z-5-Nonadecene	2,6-Octadienal, 3,7-dimethyl-	0.695127	0.00136321
Naphthalene, 1,2,3,4,4a,5,6,8a-octahydro-7-me	2,6-Octadienal, 3,7-dimethyl-	0.850181	7.88823e-06
1,6-Cyclodecadiene, 1-methyl-5-methylene-8-(1	2,6-Octadienal, 3,7-dimethyl-	0.830781	1.95885e-05
1H-Cycloprop[e]azulene, decahydro-1,1,7-trime	2,6-Octadienal, 3,7-dimethyl-	0.87862	1.60807e-06
.beta.-Myrcene	2,6-Octadienal, 3,7-dimethyl-	0.590661	0.00985161
Benzyl Alcohol	2,6-Octadienal, 3,7-dimethyl-	-0.601743	0.00824143
Cadala-1(10),3,8-triene	2,6-Octadienal, 3,7-dimethyl-	0.712789	0.00090016
.alpha.-Cadinol	2,6-Octadienal, 3,7-dimethyl-	0.632182	0.00487896
9-Tricosene, (Z)-	2,6-Octadienal, 3,7-dimethyl-	0.572008	0.0131241
Benzene, 1,3,5-trimethoxy-	2,6-Octadienal, 3,7-dimethyl-	-0.720597	0.000742111
Bicyclo[4.4.0]dec-1-ene, 2-isopropyl-5-methyl	2,6-Octadienal, 3,7-dimethyl-	0.843254	1.10671e-05
2-Butanone, 4-(2,6,6-trimethyl-1-cyclohexen-1	2,6-Octadienal, 3,7-dimethyl-	-0.510286	0.0304885
1,3,6-Octatriene, 3,7-dimethyl-, (E)-	Hexanal	-0.772373	0.000172332
.gamma.-Elemene	Hexanal	-0.596742	0.00893951
.alpha.-Cubebene	Hexanal	-0.495635	0.0364679
1H-Cycloprop[e]azulene, 1a,2,3,4,4a,5,6,7b-oc	Hexanal	-0.630562	0.00502381
Copaene	Hexanal	-0.478448	0.0445873
3-Octadecene, (E)-	Hexanal	-0.792596	8.77175e-05
2,4-Hexadienal, (E,E)-	Hexanal	0.735178	0.000508619
1H-Cyclopropa[a]naphthalene, 1a,2,3,5,6,7,7a,	Hexanal	-0.518084	0.0276319
1-Nonadecene	Hexanal	0.637954	0.00439049
Z-5-Nonadecene	Hexanal	-0.667887	0.00245292
Naphthalene, 1,2,3,4,4a,5,6,8a-octahydro-7-me	Hexanal	-0.625695	0.00547996
1,6-Cyclodecadiene, 1-methyl-5-methylene-8-(1	Hexanal	-0.517369	0.027885
1H-Cycloprop[e]azulene, decahydro-1,1,7-trime	Hexanal	-0.510984	0.0302239
Benzyl Alcohol	Hexanal	0.740876	0.000435947
Cadala-1(10),3,8-triene	Hexanal	-0.726382	0.000640587
.alpha.-Cadinol	Hexanal	-0.564627	0.0146364
Bicyclo[4.4.0]dec-1-ene, 2-isopropyl-5-methyl	Hexanal	-0.5055	0.0323516
2-Butanone, 4-(2,6,6-trimethyl-1-cyclohexen-1	Hexanal	0.48674	0.0405144
.gamma.-Elemene	1,3,6-Octatriene, 3,7-dimethyl-, (E)-	0.59575	0.00908338
.alpha.-Cubebene	1,3,6-Octatriene, 3,7-dimethyl-, (E)-	0.652407	0.00333995
1H-Cycloprop[e]azulene, 1a,2,3,4,4a,5,6,7b-oc	1,3,6-Octatriene, 3,7-dimethyl-, (E)-	0.774369	0.000161712
Copaene	1,3,6-Octatriene, 3,7-dimethyl-, (E)-	0.670688	0.00231539
3-Octadecene, (E)-	1,3,6-Octatriene, 3,7-dimethyl-, (E)-	0.844841	1.02556e-05
2,4-Hexadienal, (E,E)-	1,3,6-Octatriene, 3,7-dimethyl-, (E)-	-0.697503	0.00129133
Z-5-Nonadecene	1,3,6-Octatriene, 3,7-dimethyl-, (E)-	0.705795	0.00106466
Naphthalene, 1,2,3,4,4a,5,6,8a-octahydro-7-me	1,3,6-Octatriene, 3,7-dimethyl-, (E)-	0.60879	0.00733293
1,6-Cyclodecadiene, 1-methyl-5-methylene-8-(1	1,3,6-Octatriene, 3,7-dimethyl-, (E)-	0.615243	0.00657371
1H-Cycloprop[e]azulene, decahydro-1,1,7-trime	1,3,6-Octatriene, 3,7-dimethyl-, (E)-	0.667989	0.0024478
.beta.-Myrcene	1,3,6-Octatriene, 3,7-dimethyl-, (E)-	0.468986	0.0496075
Benzyl Alcohol	1,3,6-Octatriene, 3,7-dimethyl-, (E)-	-0.548785	0.0183493
Cadala-1(10),3,8-triene	1,3,6-Octatriene, 3,7-dimethyl-, (E)-	0.582232	0.0112379
.alpha.-Cadinol	1,3,6-Octatriene, 3,7-dimethyl-, (E)-	0.631399	0.00494853
9-Tricosene, (Z)-	1,3,6-Octatriene, 3,7-dimethyl-, (E)-	0.661937	0.00276748
Benzene, 1,3,5-trimethoxy-	1,3,6-Octatriene, 3,7-dimethyl-, (E)-	-0.565812	0.0143847
Bicyclo[4.4.0]dec-1-ene, 2-isopropyl-5-methyl	1,3,6-Octatriene, 3,7-dimethyl-, (E)-	0.558251	0.0160512
.alpha.-Cubebene	.gamma.-Elemene	0.850654	7.7033e-06
1H-Cycloprop[e]azulene, 1a,2,3,4,4a,5,6,7b-oc	.gamma.-Elemene	0.638039	0.00438359
Copaene	.gamma.-Elemene	0.790876	9.31609e-05
3-Octadecene, (E)-	.gamma.-Elemene	0.582345	0.0112182
2,4-Hexadienal, (E,E)-	.gamma.-Elemene	-0.552312	0.0174645
1H-Cyclopropa[a]naphthalene, 1a,2,3,5,6,7,7a,	.gamma.-Elemene	0.890207	7.48428e-07
1-Nonadecene	.gamma.-Elemene	-0.814896	3.80728e-05
Z-5-Nonadecene	.gamma.-Elemene	0.601228	0.00831113
Naphthalene, 1,2,3,4,4a,5,6,8a-octahydro-7-me	.gamma.-Elemene	0.718461	0.000782842
1,6-Cyclodecadiene, 1-methyl-5-methylene-8-(1	.gamma.-Elemene	0.66873	0.00241081
1H-Cycloprop[e]azulene, decahydro-1,1,7-trime	.gamma.-Elemene	0.616285	0.00645733
.beta.-Myrcene	.gamma.-Elemene	0.756337	0.000281154
Cadala-1(10),3,8-triene	.gamma.-Elemene	0.534386	0.0223343
.alpha.-Cadinol	.gamma.-Elemene	0.58402	0.0109315
9-Tricosene, (Z)-	.gamma.-Elemene	0.607494	0.00749362
Benzene, 1,3,5-trimethoxy-	.gamma.-Elemene	-0.772127	0.000173679
Bicyclo[4.4.0]dec-1-ene, 2-isopropyl-5-methyl	.gamma.-Elemene	0.615861	0.00650445
2-Butanone, 4-(2,6,6-trimethyl-1-cyclohexen-1	.gamma.-Elemene	-0.566466	0.0142473
1H-Cycloprop[e]azulene, 1a,2,3,4,4a,5,6,7b-oc	.alpha.-Cubebene	0.777503	0.000146148
Copaene	.alpha.-Cubebene	0.964093	1.24147e-10
3-Octadecene, (E)-	.alpha.-Cubebene	0.59955	0.00854187
2,4-Hexadienal, (E,E)-	.alpha.-Cubebene	-0.528314	0.0242053
1H-Cyclopropa[a]naphthalene, 1a,2,3,5,6,7,7a,	.alpha.-Cubebene	0.832775	1.79359e-05
1-Nonadecene	.alpha.-Cubebene	-0.624898	0.00555778
Z-5-Nonadecene	.alpha.-Cubebene	0.698137	0.0012727
Naphthalene, 1,2,3,4,4a,5,6,8a-octahydro-7-me	.alpha.-Cubebene	0.76496	0.000217099
1,6-Cyclodecadiene, 1-methyl-5-methylene-8-(1	.alpha.-Cubebene	0.887381	9.08752e-07
1H-Cycloprop[e]azulene, decahydro-1,1,7-trime	.alpha.-Cubebene	0.848348	8.64146e-06
.beta.-Myrcene	.alpha.-Cubebene	0.686537	0.00165138
.alpha.-Cadinol	.alpha.-Cubebene	0.632523	0.00484893
9-Tricosene, (Z)-	.alpha.-Cubebene	0.684001	0.00174548
Benzene, 1,3,5-trimethoxy-	.alpha.-Cubebene	-0.881588	1.33202e-06
Bicyclo[4.4.0]dec-1-ene, 2-isopropyl-5-methyl	.alpha.-Cubebene	0.833313	1.7511e-05
2-Butanone, 4-(2,6,6-trimethyl-1-cyclohexen-1	.alpha.-Cubebene	-0.499659	0.0347427
Copaene	1H-Cycloprop[e]azulene, 1a,2,3,4,4a,5,6,7b-oc	0.782181	0.000125287
3-Octadecene, (E)-	1H-Cycloprop[e]azulene, 1a,2,3,4,4a,5,6,7b-oc	0.728974	0.000599029
2,4-Hexadienal, (E,E)-	1H-Cycloprop[e]azulene, 1a,2,3,4,4a,5,6,7b-oc	-0.631243	0.00496249
1H-Cyclopropa[a]naphthalene, 1a,2,3,5,6,7,7a,	1H-Cycloprop[e]azulene, 1a,2,3,4,4a,5,6,7b-oc	0.545698	0.0191525
1-Nonadecene	1H-Cycloprop[e]azulene, 1a,2,3,4,4a,5,6,7b-oc	-0.471315	0.0483342
Z-5-Nonadecene	1H-Cycloprop[e]azulene, 1a,2,3,4,4a,5,6,7b-oc	0.604939	0.00781874
Naphthalene, 1,2,3,4,4a,5,6,8a-octahydro-7-me	1H-Cycloprop[e]azulene, 1a,2,3,4,4a,5,6,7b-oc	0.651101	0.00342546
1,6-Cyclodecadiene, 1-methyl-5-methylene-8-(1	1H-Cycloprop[e]azulene, 1a,2,3,4,4a,5,6,7b-oc	0.659514	0.00290477
1H-Cycloprop[e]azulene, decahydro-1,1,7-trime	1H-Cycloprop[e]azulene, 1a,2,3,4,4a,5,6,7b-oc	0.651817	0.00337833
.beta.-Myrcene	1H-Cycloprop[e]azulene, 1a,2,3,4,4a,5,6,7b-oc	0.658465	0.00296588
.alpha.-Cadinol	1H-Cycloprop[e]azulene, 1a,2,3,4,4a,5,6,7b-oc	0.630253	0.00505175
9-Tricosene, (Z)-	1H-Cycloprop[e]azulene, 1a,2,3,4,4a,5,6,7b-oc	0.63531	0.00460904
Benzene, 1,3,5-trimethoxy-	1H-Cycloprop[e]azulene, 1a,2,3,4,4a,5,6,7b-oc	-0.671787	0.00226317
Bicyclo[4.4.0]dec-1-ene, 2-isopropyl-5-methyl	1H-Cycloprop[e]azulene, 1a,2,3,4,4a,5,6,7b-oc	0.599274	0.00858025
2-Butanone, 4-(2,6,6-trimethyl-1-cyclohexen-1	1H-Cycloprop[e]azulene, 1a,2,3,4,4a,5,6,7b-oc	-0.510972	0.0302285
3-Octadecene, (E)-	Copaene	0.633383	0.00477389
1H-Cyclopropa[a]naphthalene, 1a,2,3,5,6,7,7a,	Copaene	0.793943	8.36425e-05
1-Nonadecene	Copaene	-0.523493	0.0257762
Z-5-Nonadecene	Copaene	0.661405	0.00279718
Naphthalene, 1,2,3,4,4a,5,6,8a-octahydro-7-me	Copaene	0.723471	0.00069012
1,6-Cyclodecadiene, 1-methyl-5-methylene-8-(1	Copaene	0.875943	1.89797e-06
1H-Cycloprop[e]azulene, decahydro-1,1,7-trime	Copaene	0.825971	2.41211e-05
.beta.-Myrcene	Copaene	0.675412	0.00209782
.alpha.-Cadinol	Copaene	0.633529	0.00476124
9-Tricosene, (Z)-	Copaene	0.72975	0.000587023
Benzene, 1,3,5-trimethoxy-	Copaene	-0.908757	1.80836e-07
Bicyclo[4.4.0]dec-1-ene, 2-isopropyl-5-methyl	Copaene	0.818863	3.24446e-05
2-Butanone, 4-(2,6,6-trimethyl-1-cyclohexen-1	Copaene	-0.492697	0.0377686
2,4-Hexadienal, (E,E)-	3-Octadecene, (E)-	-0.583771	0.0109737
Z-5-Nonadecene	3-Octadecene, (E)-	0.767824	0.000198766
Naphthalene, 1,2,3,4,4a,5,6,8a-octahydro-7-me	3-Octadecene, (E)-	0.652054	0.00336287
1,6-Cyclodecadiene, 1-methyl-5-methylene-8-(1	3-Octadecene, (E)-	0.645596	0.00380583
1H-Cycloprop[e]azulene, decahydro-1,1,7-trime	3-Octadecene, (E)-	0.634504	0.0046774
.beta.-Myrcene	3-Octadecene, (E)-	0.485902	0.0409127
Cadala-1(10),3,8-triene	3-Octadecene, (E)-	0.60411	0.00792667
.alpha.-Cadinol	3-Octadecene, (E)-	0.770784	0.000181208
9-Tricosene, (Z)-	3-Octadecene, (E)-	0.830902	1.94845e-05
Benzene, 1,3,5-trimethoxy-	3-Octadecene, (E)-	-0.583877	0.0109557
Bicyclo[4.4.0]dec-1-ene, 2-isopropyl-5-methyl	3-Octadecene, (E)-	0.562761	0.0150397
1H-Cyclopropa[a]naphthalene, 1a,2,3,5,6,7,7a,	2,4-Hexadienal, (E,E)-	-0.471535	0.0482151
1-Nonadecene	2,4-Hexadienal, (E,E)-	0.644562	0.00388095
Z-5-Nonadecene	2,4-Hexadienal, (E,E)-	-0.706228	0.00105379
.beta.-Myrcene	2,4-Hexadienal, (E,E)-	-0.486387	0.0406818
Benzyl Alcohol	2,4-Hexadienal, (E,E)-	0.836123	1.54277e-05
.alpha.-Cadinol	2,4-Hexadienal, (E,E)-	-0.658032	0.0029914
1-Nonadecene	1H-Cyclopropa[a]naphthalene, 1a,2,3,5,6,7,7a,	-0.8483	8.66229e-06
Z-5-Nonadecene	1H-Cyclopropa[a]naphthalene, 1a,2,3,5,6,7,7a,	0.482553	0.0425338
Naphthalene, 1,2,3,4,4a,5,6,8a-octahydro-7-me	1H-Cyclopropa[a]naphthalene, 1a,2,3,5,6,7,7a,	0.695035	0.00136606
1,6-Cyclodecadiene, 1-methyl-5-methylene-8-(1	1H-Cyclopropa[a]naphthalene, 1a,2,3,5,6,7,7a,	0.678636	0.00195926
1H-Cycloprop[e]azulene, decahydro-1,1,7-trime	1H-Cyclopropa[a]naphthalene, 1a,2,3,5,6,7,7a,	0.597933	0.00876907
.beta.-Myrcene	1H-Cyclopropa[a]naphthalene, 1a,2,3,5,6,7,7a,	0.664656	0.00261986
Benzene, 1,3,5-trimethoxy-	1H-Cyclopropa[a]naphthalene, 1a,2,3,5,6,7,7a,	-0.704728	0.00109181
Bicyclo[4.4.0]dec-1-ene, 2-isopropyl-5-methyl	1H-Cyclopropa[a]naphthalene, 1a,2,3,5,6,7,7a,	0.671783	0.00226335
2-Butanone, 4-(2,6,6-trimethyl-1-cyclohexen-1	1H-Cyclopropa[a]naphthalene, 1a,2,3,5,6,7,7a,	-0.698338	0.00126685
Naphthalene, 1,2,3,4,4a,5,6,8a-octahydro-7-me	1-Nonadecene	-0.621557	0.0058937
.beta.-Myrcene	1-Nonadecene	-0.564775	0.0146047
Benzyl Alcohol	1-Nonadecene	0.674364	0.00214458
Cadala-1(10),3,8-triene	1-Nonadecene	-0.51894	0.0273314
Bicyclo[4.4.0]dec-1-ene, 2-isopropyl-5-methyl	1-Nonadecene	-0.484701	0.0414888
2-Butanone, 4-(2,6,6-trimethyl-1-cyclohexen-1	1-Nonadecene	0.784379	0.000116395
Naphthalene, 1,2,3,4,4a,5,6,8a-octahydro-7-me	Z-5-Nonadecene	0.568846	0.013756
1,6-Cyclodecadiene, 1-methyl-5-methylene-8-(1	Z-5-Nonadecene	0.624455	0.00560137
1H-Cycloprop[e]azulene, decahydro-1,1,7-trime	Z-5-Nonadecene	0.663324	0.00269132
.beta.-Myrcene	Z-5-Nonadecene	0.494947	0.0367695
Benzyl Alcohol	Z-5-Nonadecene	-0.599502	0.00854861
Cadala-1(10),3,8-triene	Z-5-Nonadecene	0.519371	0.0271812
.alpha.-Cadinol	Z-5-Nonadecene	0.770394	0.000183441
9-Tricosene, (Z)-	Z-5-Nonadecene	0.678111	0.00198132
Benzene, 1,3,5-trimethoxy-	Z-5-Nonadecene	-0.550967	0.017798
Bicyclo[4.4.0]dec-1-ene, 2-isopropyl-5-methyl	Z-5-Nonadecene	0.614139	0.00669883
1,6-Cyclodecadiene, 1-methyl-5-methylene-8-(1	Naphthalene, 1,2,3,4,4a,5,6,8a-octahydro-7-me	0.829386	2.08214e-05
1H-Cycloprop[e]azulene, decahydro-1,1,7-trime	Naphthalene, 1,2,3,4,4a,5,6,8a-octahydro-7-me	0.783664	0.000119227
.beta.-Myrcene	Naphthalene, 1,2,3,4,4a,5,6,8a-octahydro-7-me	0.484722	0.0414784
Cadala-1(10),3,8-triene	Naphthalene, 1,2,3,4,4a,5,6,8a-octahydro-7-me	0.68094	0.00186497
.alpha.-Cadinol	Naphthalene, 1,2,3,4,4a,5,6,8a-octahydro-7-me	0.585702	0.0106494
9-Tricosene, (Z)-	Naphthalene, 1,2,3,4,4a,5,6,8a-octahydro-7-me	0.531286	0.0232748
Benzene, 1,3,5-trimethoxy-	Naphthalene, 1,2,3,4,4a,5,6,8a-octahydro-7-me	-0.791399	9.14767e-05
Bicyclo[4.4.0]dec-1-ene, 2-isopropyl-5-methyl	Naphthalene, 1,2,3,4,4a,5,6,8a-octahydro-7-me	0.876555	1.82802e-06
2-Butanone, 4-(2,6,6-trimethyl-1-cyclohexen-1	Naphthalene, 1,2,3,4,4a,5,6,8a-octahydro-7-me	-0.498755	0.0351248
1H-Cycloprop[e]azulene, decahydro-1,1,7-trime	1,6-Cyclodecadiene, 1-methyl-5-methylene-8-(1	0.930237	2.26319e-08
.beta.-Myrcene	1,6-Cyclodecadiene, 1-methyl-5-methylene-8-(1	0.478768	0.0444245
Cadala-1(10),3,8-triene	1,6-Cyclodecadiene, 1-methyl-5-methylene-8-(1	0.545959	0.0190835
.alpha.-Cadinol	1,6-Cyclodecadiene, 1-methyl-5-methylene-8-(1	0.619566	0.00610168
9-Tricosene, (Z)-	1,6-Cyclodecadiene, 1-methyl-5-methylene-8-(1	0.643275	0.00397624
Benzene, 1,3,5-trimethoxy-	1,6-Cyclodecadiene, 1-methyl-5-methylene-8-(1	-0.838323	1.39488e-05
Bicyclo[4.4.0]dec-1-ene, 2-isopropyl-5-methyl	1,6-Cyclodecadiene, 1-methyl-5-methylene-8-(1	0.945049	3.51592e-09
.beta.-Myrcene	1H-Cycloprop[e]azulene, decahydro-1,1,7-trime	0.503268	0.0332496
Cadala-1(10),3,8-triene	1H-Cycloprop[e]azulene, decahydro-1,1,7-trime	0.523315	0.0258357
.alpha.-Cadinol	1H-Cycloprop[e]azulene, decahydro-1,1,7-trime	0.604631	0.00785876
9-Tricosene, (Z)-	1H-Cycloprop[e]azulene, decahydro-1,1,7-trime	0.558469	0.0160011
Benzene, 1,3,5-trimethoxy-	1H-Cycloprop[e]azulene, decahydro-1,1,7-trime	-0.763907	0.000224193
Bicyclo[4.4.0]dec-1-ene, 2-isopropyl-5-methyl	1H-Cycloprop[e]azulene, decahydro-1,1,7-trime	0.940401	6.63331e-09
9-Tricosene, (Z)-	.beta.-Myrcene	0.500528	0.0343786
Benzene, 1,3,5-trimethoxy-	.beta.-Myrcene	-0.566116	0.0143207
2-Butanone, 4-(2,6,6-trimethyl-1-cyclohexen-1	Benzyl Alcohol	0.470833	0.0485954
.alpha.-Cadinol	Cadala-1(10),3,8-triene	0.531147	0.0233176
Benzene, 1,3,5-trimethoxy-	Cadala-1(10),3,8-triene	-0.543343	0.0197834
Bicyclo[4.4.0]dec-1-ene, 2-isopropyl-5-methyl	Cadala-1(10),3,8-triene	0.562684	0.0150565
2-Butanone, 4-(2,6,6-trimethyl-1-cyclohexen-1	Cadala-1(10),3,8-triene	-0.479418	0.0440957
9-Tricosene, (Z)-	.alpha.-Cadinol	0.659583	0.00290075
Benzene, 1,3,5-trimethoxy-	.alpha.-Cadinol	-0.590242	0.00991698
Bicyclo[4.4.0]dec-1-ene, 2-isopropyl-5-methyl	.alpha.-Cadinol	0.555759	0.0166328
Benzene, 1,3,5-trimethoxy-	9-Tricosene, (Z)-	-0.716038	0.000831297
Bicyclo[4.4.0]dec-1-ene, 2-isopropyl-5-methyl	9-Tricosene, (Z)-	0.482199	0.0427081
Bicyclo[4.4.0]dec-1-ene, 2-isopropyl-5-methyl	Benzene, 1,3,5-trimethoxy-	-0.793673	8.4447e-05
