# Supplementary material for: Identification and Characterization of Transcription Factors Involved in Geraniol Biosynthesis in Rosa chinensis
Source: Int J Mol Sci. 2022 Nov 24;23(23):14684. doi: 10.3390/ijms232314684 (PMC9739587; doi:10.3390/ijms232314684)
Supplement: Supplementary file 1 [file ijms-23-14684-s001.zip › Table S4.xlsx]

## Sheet: Table S4
Table S4: List of differential volatile compounds analyzed by GC-MS in petals of OBL and OB.
Name	Another name	KEGG ID	mz	rtmins	mean_OB	mean_OBL	sd_OB	sd_OBL	VIP	pvalue	FDR	log2(OB vs.OBL)
Volatile compounds derived from fatty acid (6)
(E)-2-Hexenal	Leaf aldehyde	C08497	98.073	12.535	87.479	167.796	16.279	14.5652	1.45673	6.90128e-09	9.24771e-08	-0.9397
Hexanal		C02373	100.089	8.133	34.9646	53.349	5.14438	6.19095	1.33821	3.89032e-06	2.60652e-05	-0.60957
2-Hexen-1-ol, (E)-	2-Hexen-1-ol		100.089	18.19	2.37235	6.9937	1.05961	0.898158	1.43834	2.82078e-08	2.69989e-07	-1.5597
3-Hexen-1-ol	Leaf alcohol	C08492	100.089	17.599	7.29618	25.4246	2.71883	3.4171	1.47533	1.19866e-09	2.00775e-08	-1.801
1-Nonadecene			266.297	32.253	0.991314	1.24973	0.140254	0.0958095	1.16535	0.000318418	0.00112284	-0.3342
Z-5-Nonadecene			266.297	30.627	0.79452	0.434551	0.0656366	0.22967	1.16052	0.000348097	0.00116613	0.87056
Terpenoids in the scent of roses (17)
2,6-Octadien-1-ol, 3,7-dimethyl-, (E)-	Geraniol	C01500	154.136	28.748	121.517	6.34891	9.76159	1.49382	1.53952	1.51694e-16	1.01635e-14	4.2585
2,6-Octadienal, 3,7-dimethyl-	Citral	C01499	152.12	26.065	12.4157	0.196757	4.80105	0.0151414	1.37259	1.01064e-06	7.52364e-06	5.9796
.beta.-Myrcene	Myrcene	C06074	136.125	10.398	1.15099	0.196757	0.756999	0.0151414	1.06442	0.00163751	0.00457138	2.5484
6-Octen-1-ol, 3,7-dimethyl-, (R)-	Citronellol	C11386	156.151	26.914	1.10014	0.196757	0.1477	0.0151414	1.51363	3.89625e-12	8.70163e-11	2.4832
3-Carene		C09839	136.125	13.343	1.06847	0.196757	0.137822	0.0151414	1.51584	2.35802e-12	7.89938e-11	2.4411
1,3,6-Octatriene, 3,7-dimethyl-, (E)-	Ocimene	C09873	136.125	12.779	0.529531	0.196757	0.153947	0.0151414	1.31709	7.96826e-06	4.85339e-05	1.4283
Cadala-1(10),3,8-triene			202.172	30.943	0.399329	0.196757	0.164757	0.0151414	1.04806	0.00205596	0.00501088	1.0212
Naphthalene, 1,2,3,4,4a,5,6,8a-octahydro-7-methyl-4-methylene-1-(1-methylethyl)-, (1.alpha.,4a.alpha.,8a.alpha.)-	γ-Muurolene		204.188	25.706	156.563	127.474	18.687	8.78307	1.12543	0.000642004	0.0020483	0.29655
Copaene		C09639	204.188	20.317	38.4703	30.2446	3.69386	2.93983	1.23058	8.30166e-05	0.000370808	0.34707
α-Cubebene		C09647	204.188	19.407	21.1318	16.5409	1.95451	1.5897	1.25053	5.17249e-05	0.000266582	0.35337
1,6-Cyclodecadiene, 1-methyl-5-methylene-8-(1-methylethyl)-, [s-(E,E)]-	Germacrene D	C16142	204.188	22.792	10.3392	8.59829	1.11352	0.728912	1.08519	0.00121006	0.00368519	0.26601
γ-Elemene			204.188	26.154	6.09106	4.44921	0.768143	0.289299	1.28936	1.84941e-05	0.000103258	0.45314
1H-Cycloprop[e]azulene, decahydro-1,1,7-trimethyl-4-methylene-, [1aR-(1a.alpha.,4a.beta.,7.alpha.,7a.beta.,7b.alpha.)]-	Aromadendrene		204.188	21.268	3.46008	2.52429	0.393214	0.357458	1.23538	7.43128e-05	0.00035564	0.45493
1H-Cycloprop[e]azulene, 1a,2,3,4,4a,5,6,7b-octahydro-1,1,4,7-tetramethyl-, [1aR-(1a.alpha.,4.alpha.,4a.beta.,7b.alpha.)]-	α-Gurjunene		204.188	21.268	3.46008	2.52429	0.393214	0.357458	1.23538	7.43128e-05	0.00035564	0.45493
1H-3a,7-Methanoazulene, 2,3,4,7,8,8a-hexahydro-3,6,8,8-tetramethyl-, [3R-(3.alpha.,3a.beta.,7.beta.,8a.alpha.)]-	α-Cedrene	C09630	204.188	27.278	2.79538	2.00395	0.264343	0.13712	1.38502	5.7933e-07	4.85189e-06	0.4802
α-Cadinol			222.198	35.345	2.0056	1.39807	0.132827	0.478567	1.04754	0.00207072	0.00501088	0.5206
1H-Cyclopropa[a]naphthalene, 1a,2,3,5,6,7,7a,7b-octahydro-1,1,7,7a-tetramethyl-, [1aR-(1a.alpha.,7.alpha.,7a.alpha.,7b.alpha.)]-	(+)-calarene		204.188	25.363	0.853386	0.196757	0.404761	0.0151414	1.19677	0.000172563	0.000642318	2.1168
Carotenoid derived volatiles (1)
2-Butanone, 4-(2,6,6-trimethyl-1-cyclohexen-1-yl)-	Dihydro-β-ionone		194.167	28.295	7.28035	8.23756	0.551867	0.641114	1.00265	0.0037016	0.00800024	-0.17821
2,6,10,10-Tetramethyl-1-oxa-spiro[4.5]dec-6-ene	theaspirane		194.167	20.544	7.43385	15.1951	1.35171	1.75688	1.4481	1.38023e-08	1.54126e-07	-1.0314
Volatile compounds related to the shikimic acid pathway (2)
Benzene, 1,3,5-trimethoxy-	1,3,5-Trimethoxybenzene		168.079	34.634	200.852	275.729	44.4489	44.9466	1.02915	0.00264639	0.00611408	-0.45712
Benzyl Alcohol		C00556	108.058	29.228	1.09977	1.35617	0.0903879	0.185761	1.05577	0.00184902	0.00495536	-0.30233
Others (5)
9-Tricosene, (Z)-			322.36	38.148	0.514151	0.280935	0.0682769	0.178306	1.04672	0.0020941	0.00501088	0.87195
2,4-Hexadienal, (E,E)-			96.058	17.874	0.801673	1.42536	0.168351	0.337561	1.20621	0.000141817	0.000558925	-0.83024
3-Octadecene, (E)-			252.282	28.175	0.877508	0.671263	0.0759515	0.0930526	1.22389	9.65958e-05	0.000404495	0.38653
Bicyclo[4.4.0]dec-1-ene, 2-isopropyl-5-methyl-9-methylene-			204.188	22.365	5.30329	4.33367	0.784114	0.307848	1.01258	0.00327189	0.00730721	0.2913
