# Supplementary material for: Identification and Characterization of Transcription Factors Involved in Geraniol Biosynthesis in Rosa chinensis
Source: Int J Mol Sci. 2022 Nov 24;23(23):14684. doi: 10.3390/ijms232314684 (PMC9739587; doi:10.3390/ijms232314684)
Supplement: Supplementary file 1 [file ijms-23-14684-s001.zip › Table S5.xlsx]

## Sheet: Table S5
Table S5: Analysis of the read quality for 6 samples. Error (%) represent the error rate of sequenced bases.
Sample name	Raw reads	Clean reads	Clean bases	Error rate(%)	Q20(%)	Q30(%)	GC content(%)
OB_1	65330736	63798978	9.57 G	0.02	98.19	94.66	45.73
OB_2	61269012	59978602	9.0 G	0.02	98.14	94.49	45.75
OB_3	62414948	60900120	9.14 G	0.02	98.26	94.8	45.53
OBL_1	73557870	71910602	10.79 G	0.02	98.27	94.82	45.69
OBL_2	67244182	64930596	9.74 G	0.02	98.27	94.86	45.79
OBL_3	52356196	50987134	7.65 G	0.02	98.1	94.46	45.85
