# Supplementary material for: Identification and Characterization of Transcription Factors Involved in Geraniol Biosynthesis in Rosa chinensis
Source: Int J Mol Sci. 2022 Nov 24;23(23):14684. doi: 10.3390/ijms232314684 (PMC9739587; doi:10.3390/ijms232314684)
Supplement: Supplementary file 1 [file ijms-23-14684-s001.zip › Table S6.xlsx]

## Sheet: Table S6
Table S6: Number of RNA-seq reads sequenced and mapped on the R. chinensis genome.
Sample	Total_reads	Total_map	Unique_map	Multi_map	Read1_map	Read2_map	Positive_map	Negative_map	Splice_map	Unsplice_map	Proper_map
OB_1	63798978	57467667(90.08%)	55266869(86.63%)	2200798(3.45%)	27609892(43.28%)	27656977(43.35%)	27623464(43.3%)	27643405(43.33%)	20966166(32.86%)	34300703(53.76%)	52046282(81.58%)
OB_2	59978602	54183560(90.34%)	52109217(86.88%)	2074343(3.46%)	26093253(43.5%)	26015964(43.38%)	26042520(43.42%)	26066697(43.46%)	19544594(32.59%)	32564623(54.29%)	49097958(81.86%)
OB_3	60900120	54823301(90.02%)	52629042(86.42%)	2194259(3.6%)	26286478(43.16%)	26342564(43.26%)	26305231(43.19%)	26323811(43.22%)	19769429(32.46%)	32859613(53.96%)	49581394(81.41%)
OBL_1	71910602	64495103(89.69%)	62111784(86.37%)	2383319(3.31%)	30992236(43.1%)	31119548(43.28%)	31044109(43.17%)	31067675(43.2%)	23625177(32.85%)	38486607(53.52%)	58496914(81.35%)
OBL_2	64930596	58172552(89.59%)	56059202(86.34%)	2113350(3.25%)	28000944(43.12%)	28058258(43.21%)	28017994(43.15%)	28041208(43.19%)	21129500(32.54%)	34929702(53.8%)	52769032(81.27%)
OBL_3	50987134	45712508(89.65%)	44043509(86.38%)	1668999(3.27%)	22050782(43.25%)	21992727(43.13%)	22010121(43.17%)	22033388(43.21%)	16723017(32.8%)	27320492(53.58%)	41476480(81.35%)
