# Supplementary material for: Identification and Characterization of Transcription Factors Involved in Geraniol Biosynthesis in Rosa chinensis
Source: Int J Mol Sci. 2022 Nov 24;23(23):14684. doi: 10.3390/ijms232314684 (PMC9739587; doi:10.3390/ijms232314684)
Supplement: Supplementary file 1 [file ijms-23-14684-s001.zip › Table S7.xlsx]

## Sheet: Table S7
Table S7: Functional annotation and classification of DEGs involved in terpene biosynthesis pathway by RNA-seq analysis (OB vs. OBL).
		Homozygous annotation	Gene_description	OB_fpkm	OBL_fpkm	OB_readcount	OBL_readcount	OBvsOBL_log2FoldChange	OBvsOBL_pvalue	OBvsOBL_padj
MEP pathway (plastidial)	DXS	RchiOBHmChr6g0298741	Putative 1-deoxy-D-xylulose-5-phosphate synthase	7.19905	9.86929	489.844	671.536	-0.455542	0.000174235	0.00117832
	DXR	RchiOBHmChr7g0193571	Putative 1-deoxy-D-xylulose-5-phosphate reductoisomerase	82.999	112.887	4419.87	6011.48	-0.443586	1.26447e-06	1.32842e-05
	MCT	RchiOBHmChr7g0218881	Putative 2-C-methyl-D-erythritol 4-phosphate cytidylyltransferase	7.0399	9.64369	238.472	326.673	-0.453236	0.00220812	0.0109696
	CMK	RchiOBHmChr5g0050131	Putative 4-(cytidine 5'-diphospho)-2-C-methyl-D-erythritol kinase	19.9744	21.7987	801.555	874.763	0.126963	0.206522	0.405987
	MDS	RchiOBHmChr7g0196611	Putative 2-C-methyl-D-erythritol 2,4-cyclodiphosphate synthase	42.1841	49.8408	1274.78	1506.16	-0.240655	0.015292	0.0560619
	HDS	RchiOBHmChr5g0059471	Putative (E)-4-hydroxy-3-methylbut-2-enyl-diphosphate synthase (ferredoxin)	51.5233	43.2974	3388.26	2847.31	0.250662	0.0416063	0.124006
	HDR	RchiOBHmChr6g0262391	Putative 4-hydroxy-3-methylbut-2-enyl diphosphate reductase	121.835	155.708	5113.27	6534.9	-0.354122	8.21535e-05	0.000600323
MVA pathway (cytosolic)	AACT	RchiOBHmChr2g0155821	Putative acetyl-CoA C-acetyltransferase	73.063	71.4242	2980.34	2913.49	0.0330482	0.779845	0.891279
	HMGCS	RchiOBHmChr7g0199551	Putative hydroxymethylglutaryl-CoA synthase	210.861	231.212	11637.4	12760.6	-0.132911	0.20026	0.397277
	HMGCR	RchiOBHmChr2g0096771	Putative hydroxymethylglutaryl-CoA reductase (NADPH)	397.104	369.693	25685.6	23912.7	0.10326	0.219363	0.423759
	HMGCR	RchiOBHmChr6g0281491	Putative hydroxymethylglutaryl-CoA reductase (NADPH)	0.0476379	0.0314899	2.48891	1.64523	0.600895	0.690273	0.836583
	HMGCR	RchiOBHmChr6g0281521	Putative hydroxymethylglutaryl-CoA reductase (NADPH)	172.05	88.0715	10905	5582.19	0.966047	1.85502e-15	5.92003e-14
	MVK	RchiOBHmChr3g0454501	Putative mevalonate kinase	15.598	14.5997	648.507	607.004	0.0962695	0.429986	0.6457
	PMK	RchiOBHmChr7g0212251	Putative phosphomevalonate kinase	27.6906	26.2332	1436.55	1360.94	0.0785357	0.468821	0.678773
	MVD	RchiOBHmChr1g0332421	Putative diphosphomevalonate decarboxylase	38.172	41.6646	1741.54	1900.89	-0.125915	0.210313	0.411322
	IDI	RchiOBHmChr3g0447851	Putative isopentenyl-diphosphate Delta-isomerase	38.9871	39.9377	1379	1412.62	-0.0340054	0.718416	0.85353
Sesquiterpenes	FPPS	RchiOBHmChr5g0000321	Putative transferase	56.9041	65.0413	1908.05	2180.89	-0.192698	0.045372	0.133125
	GDS	RchiOBHmChr5g0038101	Putative lyase	3780.8	3432.08	208754	189500	0.139621	0.146678	0.318953
	TPS	RchiOBHmChr2g0160561	Putative lyase	6.16297	3.58493	319.423	185.805	0.782729	0.00161066	0.0083608
	TPS	RchiOBHmChr5g0059501	Putative lyase	0.329794	0	16.2113	0	6.51233	1.7356e-06	1.77182e-05
Norterpenes	GGPPS	RchiOBHmChr2g0102671	Putative geranylgeranyl diphosphate synthase	230.806	115.277	12347.5	6166.99	1.00145	8.6957e-31	8.3419e-29
	GGPPS	RchiOBHmChr6g0279181	Putative geranylgeranyl diphosphate synthase	26.1174	26.9307	848.193	874.605	-0.0432752	0.757115	0.878025
	CCD1	RchiOBHmChr1g0316311	Putative carotenoid oxygenase	74.0748	83.6832	3906.48	4413.2	-0.176241	0.0738267	0.193033
	CCD1	RchiOBHmChr1g0316181	Putative carotenoid oxygenase	0.157023	0.197285	5.71959	7.18615	-0.311834	0.713396	0.850543
Acyclic monoterpenes	NUDX1	RchiOBHmChr2g0142071	Geranyl diphosphate phosphohydrolase	72.532	25.2558	1382.38	481.347	1.52137	2.41925e-16	8.2447e-15
	NUDX1	RchiOBHmChr2g0142081	Geranyl diphosphate phosphohydrolase	314.184	61.316	5664.32	1105.45	2.3565	9.39319e-129	2.74426e-125
	NUDX1	RchiOBHmChr2g0142111	Geranyl diphosphate phosphohydrolase	241.686	68.5071	4072.72	1154.43	1.81861	1.55234e-09	2.57817e-08
	NUDX1	RchiOBHmChr2g0142121	Geranyl diphosphate phosphohydrolase	3278.78	505.509	54045.4	8332.48	2.69739	4.84731e-140	1.73087e-136
Degradation	G8H	RchiOBHmChr4g0430851	Putative geraniol 8-hydroxylase	41.9577	12.226	1926.61	561.394	1.77978	4.22295e-34	4.98945e-32
	CYP82D47	RchiOBHmChr1g0359751	Putative cytochrome P450	40.908	17.0035	1425.87	592.663	1.26696	2.48878e-22	1.36255e-20
