# Supplementary material for: Identification and Characterization of Transcription Factors Involved in Geraniol Biosynthesis in Rosa chinensis
Source: Int J Mol Sci. 2022 Nov 24;23(23):14684. doi: 10.3390/ijms232314684 (PMC9739587; doi:10.3390/ijms232314684)
Supplement: Supplementary file 1 [file ijms-23-14684-s001.zip › Table S8.xlsx]

## Sheet: Table S8
Table S8: FPKMs of the 3,574 DEGs across 26 samples used for the WGCNA (|log2Ratio| ≥ 0.5 and p ≤ 0.05, OB vs. OBL).
Gene_id	OB_1	OB_2	OB_3	OBL_1	OBL_2	OBL_3	FB_GP1	FB_GP2	FB_CP1	FB_CP2	FB_PP1	FB_PP2	OF_PP1	OF_PP2	Le_1	Le_2	Ste_1	Ste_2	Pri_1	Pri_2	Sta_1	Sta_2	PO_1	PO_2	Ro_1	Ro_2
RchiOBHmChr5g0059511	165.275	253.56	151.325	0.100876	0.044514	0.0287981	1.95869	2.46172	1.75988	2.36341	61.8132	55.7204	3993.79	3754.25	0	0.0963944	0	0.109504	0.658303	3.26294	2142.78	2101.15	624.614	679.602	1.92073	4.66712
RchiOBHmChr1g0347201	12.2211	24.4763	16.1473	0.0270618	0.0298543	0	6.84114	6.89474	7.58314	6.43997	12.2765	11.9173	66.4657	62.7351	6.97091	3.56281	2.22753	2.60037	1.71094	1.43552	21.8521	22.0244	5.51399	6.78536	8.66451	10.1586
RchiOBHmChr2g0170151	0.863482	9.90701	2.82382	0.029522	0	0	0.0389716	0.0321433	16.6186	14.7844	62.5269	64.1773	0.0333294	0.0264394	0	0	0	0	0.157177	0	6919.93	7178.07	0.0358051	3.603	0	0
RchiOBHmChr6g0279691	10.8352	19.3301	14.2141	0.0536365	0.0394475	0.0510408	0	0.0486402	0.0741819	0	17.0908	18.4614	136.88	135.27	0	0	0	0	0.237845	0	2322.9	2289.63	7.58539	15.8167	0	0.359866
RchiOBHmChr4g0443231	2.92411	3.93299	5.57262	0	0	0.0914763	0	0	0	0	0	0	0.795857	0.803516	0	0	0	0	0	0	0	0.0373346	0.0388625	0.154878	0	0.206496
RchiOBHmChr2g0161431	1.02815	2.05759	1.97629	0.0303034	0	0	0	0	0	0	0	0	9.58345	8.61867	0	0	0.337128	0	0.0604203	0	0.550745	0.211563	0.0550552	0.0548525	0	0
RchiOBHmChr4g0400921	10.6161	19.3932	14.5575	0.0406905	0.0448894	0.29041	0	0	0.033784	0	0	0.140129	52.0481	50.6905	0	0	0.151098	0.0630638	0.0541599	0	38.6167	48.1691	1.13507	1.86842	0.430173	0.655564
RchiOBHmChr6g0285861	11.6422	13.5843	12.455	0	0.249497	0.107607	29.0242	37.1421	29.6404	27.9449	46.061	36.7851	44.2703	41.8175	0	0	0	0	0	0	0	0	0	0	0	0
RchiOBHmChr3g0484171	3.26078	6.20821	3.93742	0	0	0.156013	0.288566	0.119003	0.181494	0.156687	0.469239	0.0940996	443.355	469.753	0.421262	5.51725	15.8286	18.2946	35.6421	38.6068	1.62075	2.61065	20.348	20.5372	0.57774	2.20112
RchiOBHmChr7g0214261	13.0309	8.63228	11.3811	0.143715	0.158545	0	4.99069	5.21393	4.70834	4.45621	6.13162	10.3071	0.426815	1.01575	3.56186	0.171927	2.33977	2.53902	1.67734	4.56141	1.52893	0.146831	0.917039	1.52277	4.18707	5.88784
RchiOBHmChr2g0097691	4.07951	10.6672	5.19782	0.0996258	0	0.142207	0	0	0.041358	0	0	0	14.4529	16.3724	0	0	0	0	0	0	0.805809	1.27687	0.906219	1.74557	0.451382	0.0802534
RchiOBHmChr2g0106941	13.5432	12.7614	13.6334	0.106038	0.155974	0.302719	12.6915	13.1521	10.7262	11.401	12.9238	13.2907	2.8432	2.83315	0	0	0	0	0	0	0	0	0	0	0	0
RchiOBHmChr5g0049571	5.19114	5.3799	6.74214	0.0792332	0.131114	0.0282745	17.0589	16.8322	16.9824	16.4039	23.0691	24.9815	25.7772	25.6315	0	0	0	0	0	0	0	0	0	0	0	0
RchiOBHmChr2g0159371	13.6397	10.6718	12.6907	0.120189	0.265183	0.171559	0	0	0	0	4.52929	3.72514	7.12371	5.97398	0	0	0	0	0	0	0	0	0	0	0	0
RchiOBHmChr7g0209851	13.2464	11.2813	12.9539	0.290002	0.186624	0.206975	3.12979	3.52969	0.080346	0.277456	62.2263	60.528	3.11367	1.47333	0	0	0.239563	0.14998	2.57609	2.95921	11.6756	4.79199	9.21331	6.25602	0.292299	0.389769
RchiOBHmChr5g0009441	10.0108	29.0791	17.8797	0.283332	0.250055	0.566201	0	0	0	0	0.162187	0	7.29309	6.14068	0	0	0	0.0878238	0	0	17.2641	19.2132	0	0.273894	1.45487	0.821654
RchiOBHmChr3g0462151	16.5619	15.947	23.2587	0.354611	0.422499	0.364445	0.0842611	0.0308878	0.0588844	0.0271125	0.311249	0.225922	45.9275	46.3227	0	0	0	0	0	0	0	0	0	0	0	0
RchiOBHmChr2g0168141	7.35166	6.92738	8.67945	0.168178	0.134932	0.196411	90.7044	93.1979	103.823	103.789	130.412	132.349	101.239	105.603	0	0	0	0	0	0	0	0	0	0	0	0
RchiOBHmChr4g0420841	4.13634	2.36899	2.54266	0.0930389	0.0513198	0.0664022	5.40406	4.35591	3.47613	5.77971	8.07746	7.00887	4.46411	3.6246	1.31485	0.444264	0.172743	0.0720977	1.23837	1.33545	3.76266	2.05968	3.66731	3.37275	5.12872	6.07074
RchiOBHmChr1g0376521	3.8684	12.3075	4.50744	0.214705	0.11843	0.21453	108.226	94.6901	0.0356753	0.0821309	0.0409937	0.147973	106.382	107.518	0	0	0	0.0665941	0.0571918	0.0536306	2.37488	1.60206	60.1909	31.5163	0.129787	0.830714
RchiOBHmChr4g0443451	33.4614	47.7888	38.1202	1.08665	1.24673	0.806569	0.459624	0.663412	0.86724	1.16465	19.3492	18.2854	87.0673	75.3048	0.11183	0.593769	0.754192	1.48395	0	0	104.551	100.912	155.61	207.838	1.18313	3.64615
RchiOBHmChr7g0212441	4.15803	11.3555	5.40147	0.218404	0.153326	0.198387	0	0	0.057697	0	0.0662985	0.0598288	260.233	264.44	0	0	0	0	0	0	0	0.0809686	0	0	0	0
RchiOBHmChr3g0462071	14.6251	14.4814	18.7352	0.286821	0.71194	0.375292	0	0.0260056	0	0	0.0227872	0.123381	6.1211	5.45466	0	0	0	0	0	0	0	0	0	0	0	0
RchiOBHmChr1g0379051	11.8949	12.2075	12.049	0.58431	0.257842	0.16681	6.24786	4.58059	5.19094	5.36096	6.74524	6.74098	26.7165	26.8975	0	0	0	0	0	0	0	0	0	0	0	0
RchiOBHmChr4g0400931	63.584	107.292	88.6496	2.32918	3.21191	2.67822	0.085409	0.0704444	0.026859	0.0618342	0.185179	0.584878	167.672	159.374	0	0	0	0	0	0	0	0	0	0	0	0
RchiOBHmChr3g0462161	2.27561	1.87597	3.10261	0.0221028	0.146302	0.0630995	3.1325	3.36475	0.962183	0.527409	1.73741	1.99547	0.560718	0.395381	0.141797	0.301154	0.478148	0.513166	0.734522	0.137757	0.371963	0.0642986	0.267719	0.333417	0.750091	0.266724
RchiOBHmChr2g0153231	1.00561	5.55694	1.61461	0.0209641	0.161892	0.0897728	0.663774	0.387794	0.03479	0.0200232	0.0399765	0.0901885	21.7372	23.9234	138.38	159.581	3.99366	4.38356	3.06749	4.21014	0.197703	0.0244111	1.11804	1.82279	0	0
RchiOBHmChr1g0377551	3.47263	7.1579	4.05255	0.213923	0.176999	0.0763389	1.05899	2.70767	4.16282	4.29344	16.7993	17.9917	4.75478	5.60389	1.2883	2.02474	11.6177	10.6302	16.3901	24.5813	545.528	571.894	18.1941	22.3923	30.7127	23.3932
RchiOBHmChr1g0383261	20.1707	12.981	11.9771	0.354073	0.300469	0.894181	0.539317	0.0889644	3.77646	4.16483	46.0709	47.2029	7.65651	7.34213	0	0.0371585	0.741681	1.81512	0.181261	0.305954	249.744	269.489	11.1322	15.1064	2.55031	2.06238
RchiOBHmChr4g0443461	32.0141	43.3271	33.6243	0.739558	1.63175	1.33716	0.130361	1.18272	0.983886	0.0943785	13.5668	16.6639	78.8218	67.7454	0.126871	0	1.22233	0.765248	0	0	114.619	104.13	166.24	196.295	3.2811	0.159099
RchiOBHmChr6g0304521	9.5095	10.4401	9.56119	0.33176	0.512392	0.142067	67.5328	62.2086	59.1007	55.7	59.0719	61.4987	40.547	37.5629	0	0	0	0	0	0	0	0	0	0	0	0
RchiOBHmChr3g0490631	1.62135	18.9669	6.9498	0.615923	0.226494	0.146529	3.62495	4.4987	93.4124	97.47	104.89	99.8686	0.289732	0.344757	0.0329711	0	0.127063	0	0	0	6672.31	7421.74	138.446	198.035	0	1.075
RchiOBHmChr1g0376511	2.61019	10.9496	4.06159	0.115398	0.466788	0.0549066	39.8103	38.9498	0	0	0.0366982	0	52.1122	53.6378	0	0	0	0	0	0.048011	2.74829	3.80958	21.4136	16.1289	0.290468	0.24789
RchiOBHmChr4g0410371	1.27461	10.1793	2.07514	0.145261	0.213667	0.138231	0.527332	0.237238	0.241211	0.138828	0	0	9.5117	9.9196	39.5175	46.6215	3.64098	1.12566	0	0	0.244775	0.253876	0.484486	0.526584	0.219381	0
RchiOBHmChr3g0484161	3.21713	8.00975	3.59104	0.141015	0.388916	0	0.0465381	0.0383841	0.204891	0.13477	0.235436	0.242812	306.423	306.95	0.0452923	3.84772	11.9564	11.31	20.5994	26.005	0.712864	2.2181	12.485	15.2506	0.159727	0.738364
RchiOBHmChr2g0133471	0.604427	2.98936	0.591431	0.0405197	0.0894018	0.028919	8.83637	10.8494	21.0937	22.6087	166.838	161.101	1.11638	1.83932	0.19545	0	0	0	0.101245	0	15031.2	16169.1	13.7459	29.7805	0.689273	0.367647
RchiOBHmChr6g0251771	2.6457	4.84647	2.5954	0.0983206	0.189816	0.105258	2.49849	3.29181	0.734692	1.01014	0.773868	0.698351	12.4321	13.054	2.52635	3.52113	5.26351	4.11429	12.1052	12.0571	15.6068	14.4057	35.9229	34.0977	19.8976	18.8897
RchiOBHmChr6g0304531	0.628738	0.689625	0.506439	0.0370624	0.0102217	0.0264516	1.44291	1.52292	1.34589	1.2394	1.44049	1.19625	1.02486	1.22778	0	0	0	0	0	0	0	0	0	0	0	0
RchiOBHmChr5g0003391	21.9292	37.8964	27.0393	1.38202	1.42934	0.739765	0.912194	0.705345	0	0	7.58143	5.61457	11.6532	10.83	0	0	0	0	0	0	772.466	840.405	2.98565	7.46275	4.43532	9.74124
RchiOBHmChr4g0441041	27.22	70.1675	32.1335	1.45099	1.54552	2.92819	0.990744	1.14402	0.498502	0.358638	0.143205	0.646151	1298.58	1327.49	0.0964222	0.204784	0	0	0	0	1.01174	1.74892	0.637172	0.453447	467.897	503.974
RchiOBHmChr2g0175251	22.0467	31.2932	19.3558	0.968901	1.52697	0.846745	0.70395	0.677378	0.959289	0.679525	222.071	215.015	132.949	125.762	0.799289	0.363762	4.51041	8.26468	3.90379	1.55303	8067.96	8332.72	130.537	133.493	0.268454	2.86378
RchiOBHmChr6g0274211	5.41273	14.4985	10.1532	0.616861	0.170129	0.660384	0	0.167145	1.01966	2.20073	0.878756	0.264334	116.293	96.6518	0	0	0	0	0	0	0	0	0	0	0	0
RchiOBHmChr2g0159361	11.1919	10.5108	13.6223	0.466641	0.77219	0.499565	0	0.190528	0	0	8.4309	14.5384	15.6071	13.6345	0	0	0	0	0	0	0	0	0	0	0	0
RchiOBHmChr6g0259871	0.953704	0.972652	0.942783	0.0281091	0.0620195	0.0601848	0.0556598	0.0765126	0.00583453	0.00671607	0.248061	0.332755	0	0	0	0	0	0	0	0.00877105	0	0	0	0	0	0
RchiOBHmChr6g0254851	2.02524	11.071	1.84316	0	0.662541	0.100854	0.20964	0.172909	0.0879021	0.404733	7.32297	7.47428	23.188	20.4805	0	0	0	0	0	0	0	0	0	0	0	0
RchiOBHmChr5g0040211	2.45253	4.79859	2.44329	0.181159	0.228403	0.073882	0.0341374	0.0281562	0	0.0741442	0.0740147	0.267168	0.963438	1.29695	0	0	0	0	0	0	17.0469	17.6265	0.156819	0.0312483	0	0
RchiOBHmChr1g0325451	16.6822	22.1003	17.4728	0.927409	1.32151	0.606737	43.5147	58.81	58.2902	59.0279	44.0281	48.4945	158.913	162.42	0	0	0	0	0	0	0	0	0	0	0	0
RchiOBHmChr4g0416691	1.04164	5.39943	1.59754	0.0791403	0.13096	0.225931	0	0	4.7694	4.49612	96.6632	93.3697	13.5296	14.192	0	0	0.0612959	0.0767492	0	0	8038.07	8908.38	6.48651	18.5501	0.897469	0
RchiOBHmChr5g0046101	7.65303	11.8528	8.06692	0.474009	0.679798	0.372132	0.484943	0.232244	0.0590332	0.0113254	1.24362	1.48955	7.09062	7.33348	0	0.177839	2.34688	1.45091	9.25868	8.77092	44.5538	45.992	14.8035	13.9757	129.735	127.324
RchiOBHmChr2g0086891	3.85567	8.77862	3.14408	0.237282	0.494449	0.150532	7.81253	6.87326	2.4896	2.26244	2.93603	3.87237	356.433	357.023	6.28546	8.28946	14.6509	8.31617	0	0	942.371	996.732	29.2853	49.964	0	2.03409
RchiOBHmChr6g0247671	87.0071	121.008	106.466	7.97488	4.5579	5.55455	0.253676	0.209229	0.618253	0.918277	2.4521	1.63376	225.952	241.435	46.044	75.8656	0.0594649	0.0372283	32.1319	34.9282	6.92962	8.4243	12.2068	3.65725	33.0125	24.4582
RchiOBHmChr7g0213861	4.00351	7.31757	2.9571	0.247967	0.218844	0.42474	0	0.216306	0.0824728	0.284801	6.91805	6.92711	274.303	74.0153	0.127618	0	0	0	0	0.495926	40.4398	35.7629	3.37327	5.88148	1.50018	0.800173
RchiOBHmChr5g0038141	21.0446	21.5646	30.4995	1.18357	1.68527	1.82695	0.00908384	0.059938	0.0571328	0.0328825	1.77255	1.85433	85.5956	84.6203	0	0	0	0	0	0	0	0	0	0	0	0
RchiOBHmChr1g0357541	2.29893	3.10034	4.32252	0.245623	0.270969	0.116868	0.701677	0.311627	0.271581	0.547075	1.05323	1.19686	6.0009	8.6419	0.210121	0.278913	0	0.126738	0.326533	0.0510335	4.3544	3.28717	1.09097	0.444664	0	0
RchiOBHmChr7g0195411	6.65201	14.106	7.34545	1.13714	0.250897	0.48695	0	0	0.0472067	0	0.379709	0.195803	0.19257	0.865645	0	0	0	0	0.075678	0.0709658	3.98564	3.51109	0.206874	0.274817	0	0.641216
RchiOBHmChr2g0152101	255.623	247.1	287.587	16.5597	18.5089	21.8491	0	0.0296548	1.22113	0.728845	179.606	166.347	26.0752	26.2707	0	0	0	0	0	0	361.068	366.311	30.6217	29.39	0.452474	0.526566
RchiOBHmChr1g0382811	213.153	383.486	302.413	20.8191	21.7424	22.5851	0.488586	0	0.038412	0.265294	0.5738	0.398312	694.832	698.242	0	0	0.229062	0	0.123158	0.0577448	525.009	451.94	38.4922	22.4736	0	0.596293
RchiOBHmChr5g0031031	45.1796	87.7129	47.5078	4.25178	6.40715	2.72167	0.0289315	0	0.0909823	0.0628373	0.700458	0.952873	20.982	22.8273	0.211178	0.388705	0.501863	0.475536	2.49413	2.11999	13.0144	8.40129	1.8075	2.18485	351.499	336.057
RchiOBHmChr7g0177411	4.95575	12.3984	6.92168	0.483286	0.940863	0.365212	0.900677	0.43334	0.28324	0.271696	0.271221	0	86.7847	76.9915	10.2266	3.87849	18.1572	17.3595	50.0988	45.2052	60.4744	58.7611	21.6528	19.6494	95.1428	94.2588
RchiOBHmChr6g0304151	43.7369	54.3425	43.4216	4.03702	3.25873	3.37315	0	0	0	0	2.31716	1.65305	0.0555813	0.0881826	0	0.022389	16.1081	10.7077	3.80067	3.83029	27.5868	24.4938	0.975264	2.32012	0.17349	1.03113
RchiOBHmChr4g0394531	16.2812	18.2775	16.9837	1.22072	1.52624	1.2778	0.857375	0.0883941	0.606651	1.00867	5.34436	4.05397	20.8975	20.3583	0.834423	0	0.904409	0	0.864475	1.21597	12.8048	7.47285	4.92321	5.19939	0.122611	0.130798
RchiOBHmChr7g0238571	11.7768	3.93089	4.36289	0.752605	0.345944	0.492375	0.662336	0.956003	2.6036	2.35263	21.7948	21.9223	0.0177014	0.0982946	4.41152	5.13387	11.5863	10.4492	0.292172	0.469679	21.1366	18.561	7.41635	9.11316	48.4014	51.0268
RchiOBHmChr6g0246941	0.972898	2.71459	1.57298	0.151195	0.145947	0.134885	1.29952	1.07183	1.44605	3.47381	3.75672	2.60778	46.3359	44.7596	0	0	0	0	0	0	0	0	0	0	0	0
RchiOBHmChr2g0153261	3.41392	6.77371	4.29607	0.162111	0.596131	0.462797	0	0.0588351	0	0	0.0515537	0	29.1304	31.8437	1.28434	1.47445	0	0.0418744	0	0	1.85755	1.79439	0.0655377	0.261186	11.7926	10.36
RchiOBHmChr2g0167481	6.74759	7.46302	7.16443	0.259793	0.515883	1.18666	0	0.338912	0	0	0	0	14.0567	15.6112	0	0	0.0963221	0	0	0	0	0	0	0	105.891	94.7818
RchiOBHmChr2g0173271	2.40737	1.86286	2.65833	0.137178	0.272399	0.195808	4.92156	6.8649	5.50801	5.13505	7.5322	7.93003	5.07559	5.64669	0	0	0	0	0	0	0	0	0	0	0	0
RchiOBHmChr1g0348141	2.25487	3.83373	2.03616	0.288197	0.317937	0.0771328	0.0831782	0.0686044	0.0523148	0.240876	0.0601139	0.108495	255.164	245.98	2.18569	0.9456	0.0779922	0.585929	0	0.393225	0.849407	3.52394	0.687779	0.304554	0.475804	0.507573
RchiOBHmChr2g0136401	8.07103	30.3136	11.1032	1.31973	1.91916	1.11315	0	0.0653143	0.0996119	0.0859967	1.43078	0.645577	142.763	132.564	0.0385346	0	0	0	0	0.0374367	227.196	219.19	30.9936	50.2698	3.66918	2.99603
RchiOBHmChr7g0214861	66.3643	95.1432	58.1791	6.11089	9.41747	4.1949	5.51136	4.97742	5.32542	4.07926	102.226	103.094	70.8595	75.8046	0	0	0	0	0.0310447	0	249.651	270.998	10.2403	9.46979	0	0
RchiOBHmChr2g0140071	29.1882	36.4661	43.5265	3.31401	3.94353	2.65755	0.295255	0.243523	0.0464251	0.320637	5.65469	4.33263	195.126	190.894	7.32745	8.00999	0.899751	1.03993	26.3465	30.9871	224.852	251.74	39.4691	51.0804	0.168895	0.540514
RchiOBHmChr6g0273901	5.3497	5.9243	6.10693	0.533073	0.548875	0.524184	39.1083	44.836	48.0628	43.7161	65.3466	68.0499	79.6022	80.0209	0	0	0	0	0	0	0	0	0	0	0	0
RchiOBHmChr2g0163921	24.9196	43.0894	32.0685	2.96837	3.11791	3.20034	192.417	198.775	217.748	220.06	83.8049	81.7139	116.952	111.856	138.28	184.005	24.0274	66.6761	58.8166	58.1484	972.73	1065.12	50.6846	54.5408	275.862	198.781
RchiOBHmChr1g0364651	3.19989	1.43491	2.15381	0.244202	0.215521	0.174288	249.262	240.57	144.21	152.27	60.4668	57.1151	13.1222	14.2395	1.40877	10.7711	18.7303	16.3147	5.40016	6.84313	18.6252	13.7983	10.1073	12.4551	1.98725	8.65642
RchiOBHmChr3g0462841	2.25894	3.47176	1.73006	0.189915	0.139675	0.406628	10.5197	14.392	51.9857	52.3451	44.4699	44.2686	5.49797	5.72081	1.46258	2.416	2.11368	4.3129	9.3441	8.13077	198.056	225.124	162.694	139.55	0.0955172	0.203789
RchiOBHmChr2g0151381	8.10422	12.5072	7.04034	0.928016	1.02378	0.662328	0	0.0540764	0.0824728	0.0474668	0.0473839	0.04276	4.03717	4.93732	0.255235	0.271038	2.88938	3.61782	3.30535	2.23167	29.3925	23.4947	5.60203	4.08103	17.4771	17.2837
RchiOBHmChr2g0153271	3.20722	5.87041	2.81509	0.182755	0.806454	0.156519	0.0482505	0.119389	0.0606943	0.0523984	0.104614	0.0157342	23.8099	22.4886	3.14624	2.86731	0.180969	0.283241	0.0243251	0.114052	7.04604	7.32503	0.376806	0.795005	12.8619	10.8941
RchiOBHmChr4g0416721	9.73826	9.68586	10.7008	0.888767	0.999334	1.09785	1.41087	1.76878	14.2333	15.485	118.117	121.607	13.3692	16.6931	120.778	97.9271	12.647	13.0526	23.2161	25.6657	4373.59	4489.37	48.1682	57.5477	839.6	751.847
RchiOBHmChr2g0105181	13.4	10.405	11.1147	1.03767	1.31754	1.08992	26.3553	20.8757	6.7181	7.39691	59.1559	66.0285	5.26257	6.06508	1.46893	3.35974	17.5271	28.2161	16.9743	14.0512	14.2276	9.3253	32.4275	26.7817	12.2202	17.8539
RchiOBHmChr6g0278471	3.13473	3.07196	3.10108	0.379033	0.24512	0.298502	46.5159	44.798	6.07694	5.49616	9.57654	11.1626	1.77069	2.01332	0	0	0	0	0	0.0652534	3.73529	3.89852	1.07792	0.442217	0	0.168458
RchiOBHmChr2g0120451	5.43564	6.41662	4.32857	0.536082	0.689966	0.382603	0	0	0.111273	0	0.767168	0.923072	10.7426	16.0835	0	0	0	0	0	0	0	0	0	0	0	0
RchiOBHmChr5g0035351	14.8923	28.6721	15.9785	1.69423	2.68062	1.65466	12.9104	12.5646	1.33175	1.19231	0.488842	0.421959	102.565	102.392	67.3174	42.3685	59.7276	56.8315	6.138	5.83923	410.024	395.376	51.3905	68.3222	26.176	31.1181
RchiOBHmChr5g0062941	2.0823	4.59135	2.58841	0.434102	0.239448	0.247856	1.54724	1.98512	5.40632	4.68811	1.24246	0.934344	3.9452	3.55729	1.36639	4.23454	53.9742	44.3368	84.7919	80.623	15.9173	16.3118	39.7502	36.1155	107.323	91.5489
RchiOBHmChr2g0113251	2.31347	1.93651	1.95394	0.314587	0.173524	0.128298	1.60074	1.36917	0.969494	0.944287	2.52798	2.86128	1.01406	2.09152	1.73098	0.673991	1.22298	1.94894	1.49444	2.46644	5.26723	2.14545	1.41621	1.35672	6.30794	6.07791
RchiOBHmChr2g0087761	31.6358	84.2999	36.2881	4.34381	5.39106	6.04538	0.323069	0.621748	0	0.467789	1.01177	0.421403	989.322	974.322	0	0	0	0	0	0	0	0	0	0	0	0
RchiOBHmChr5g0033461	8.61442	24.8357	10.3505	1.54799	2.01957	0.960702	0.49814	0.719005	0.234978	0.811444	0.990033	0.24366	286.498	279.528	526.134	393.903	19.6174	26.3908	36.2259	37.5615	239.341	226.706	102.403	124.996	22.4399	18.1626
RchiOBHmChr7g0213931	362.72	612.768	376.613	43.7279	55.7723	42.554	33.9971	35.4232	29.3399	31.9659	729.763	684.202	7196.48	7382.17	0.670116	1.51216	3.4702	2.5262	2.3431	1.87169	1768.13	1756.73	230.584	178.446	88.4238	143.382
RchiOBHmChr6g0300211	2.48172	6.26375	2.8417	0.388197	0.44355	0.395796	0.164717	0.226428	0.258997	0.0795011	0.436492	0.787794	81.1176	81.353	8.09554	3.83025	17.5041	17.8559	6.64326	9.50015	12.4754	13.4238	1.74034	1.85958	54.461	54.2108
RchiOBHmChr6g0265761	7.0733	12.2499	13.5314	1.19874	0.919955	1.41351	0	0	0	0	0	0.0448716	18.7702	16.5703	0	0	0	0	0	0	0	0	0	0	0	0
RchiOBHmChr7g0230541	5.3182	6.08271	3.31337	0.563512	0.331552	0.697112	28.8307	25.0866	73.0306	74.7043	10.0601	10.9523	1.1015	0.201644	26.8054	43.7215	359.281	260.901	217.172	202.572	12.4444	4.76581	256.689	291.023	904.623	913.937
RchiOBHmChr1g0334581	2.80693	4.33767	2.8657	0.322967	0.305395	0.461006	0.365439	0.150705	1.22583	0.793708	3.30134	3.61474	5.31303	4.75186	0.0592759	0	0.114218	0.0715068	0	0.057587	63.8764	74.9921	5.59578	6.74596	2.02074	0.817663
RchiOBHmChr4g0402951	11.4799	18.5574	10.0265	2.18402	0.803129	1.26506	0	0.051646	0.0393831	0	0	0.0408382	4.06993	5.90489	1.15788	0.905999	123.239	94.8349	21.7187	17.5246	34.1462	38.0243	107.695	119.622	20.9183	21.4743
RchiOBHmChr5g0077171	13.2216	46.2199	15.1679	3.50721	2.22116	2.31769	0.600162	0	1.59077	1.92423	30.703	26.7842	134.954	129.712	0	0.487348	0	0	0.302566	0	5628.6	5763.22	7.1288	15.814	0.4414	0.941742
RchiOBHmChr1g0371621	1.06681	4.48782	1.87333	0.210425	0.309518	0.300361	0	0	0	0	0	0	14.0017	13.8683	0.180041	0.286783	1.12749	0.325786	12.9635	11.5442	25.22	17.3894	124.413	192.621	65.1863	70.5547
RchiOBHmChr5g0038131	5.36827	4.87674	7.29056	0.586895	1.00061	0.304632	0	0	0	0	0.152706	0.206707	12.3783	13.3554	0	0	0	0	0	0	0	0	0	0	0	0
RchiOBHmChr6g0303541	1.03514	3.796	0.785065	0.176955	0.334654	0.108252	0.0333709	0.0550478	0.125932	0.120799	0.0723527	0.326461	17.2379	14.8064	0.552118	0	1.72097	1.72387	0.201883	0.0631043	19.0837	22.7386	1.10374	1.52733	1.33624	1.09964
RchiOBHmChr2g0094021	13.2513	19.6746	10.254	2.9174	1.04126	0.881854	16.1751	17.4798	61.4531	61.0532	12.3121	11.6795	1.81151	1.73672	5.19225	14.9725	284.969	224.612	147.775	147.484	32.3186	24.2343	224.755	258.755	623.011	660.393
RchiOBHmChr2g0111661	99.9209	174.276	133.912	16.3198	17.8858	11.907	1.35529	1.30414	1.05663	1.00164	4.16282	4.5208	311.019	309.583	32.2059	61.0317	136.928	147.614	205.305	200.597	587.369	675.691	158.449	153.471	140.033	133.031
RchiOBHmChr1g0382801	56.7333	102.527	72.2723	8.13553	8.91598	9.24432	45.1143	46.2276	39.1235	35.0441	13.809	13.5692	1610.4	1566.92	0	0.109706	5.97197	4.23729	11.8804	9.23366	383.846	390.134	129.905	134.674	9.22969	14.3803
RchiOBHmChr3g0464341	1.10074	3.28312	1.28965	0.243322	0.250535	0.138928	15.2252	14.9949	7.79808	5.81366	3.08746	2.95376	19.861	18.087	0.125043	0.099589	0.030118	0.0377111	0.161933	0.182221	71.9989	67.5596	68.0521	67.2429	0.734959	1.05844
RchiOBHmChr2g0142051	206.103	244.21	271.962	25.3723	30.4244	27.6166	0.0560094	0.23098	0.176135	0.0405495	70.3925	69.4774	330.418	325.607	0	0	0	0	0	0	83.7353	79.7396	11.2694	16.3549	0.384469	0
RchiOBHmChr1g0325221	12.4679	11.2666	11.7583	1.64197	0.923463	1.56251	6.8786	6.25123	5.44792	6.0866	68.2626	73.1489	86.6068	84.2585	1.98354	5.33171	2.09019	3.29013	1.73389	2.04746	20.6828	20.1251	11.5276	15.3913	113.452	91.0231
RchiOBHmChr3g0484271	28.4023	48.4897	31.2417	4.54093	4.35923	3.70831	0.144283	0.119003	0	0	0.521376	0.0940996	78.6021	79.4831	1.75526	2.68407	0.270575	0	0	0	3.31516	1.33716	0.39768	0.132072	0.0825343	0.70436
RchiOBHmChr0c38g0503041	1.19505	1.92972	1.21488	0.108665	0.16783	0.248175	0.90372	0.899186	2.50815	2.36784	0.29028	0.346152	0.883292	0.544985	1.45192	2.54992	20.2428	18.2224	21.218	18.8525	5.40538	4.17817	22.2202	26.117	10.7986	8.63095
RchiOBHmChr2g0142061	275.224	271.393	367.03	38.1275	34.2119	36.0802	0.280399	0.346905	0.529071	0.304504	115.509	146.664	634.88	689.966	0	0	0	0	0	0	0	0	0	0	0	0
RchiOBHmChr7g0213981	17.3751	28.9404	21.7261	3.16623	2.99396	1.93693	0	0	0	0.0360239	0.143844	0.584132	38.6394	37.7408	29.7338	19.3357	0	0	0	0	6.14834	5.70937	1.1886	1.27532	0	0
RchiOBHmChr3g0467851	1.16337	2.20267	1.27935	0.195323	0.235067	0.12673	0.0234403	0.00966666	0.0221142	0.0509108	0.0592922	0.0382187	14.4938	13.3422	0.672978	0.702533	0.0989049	0.12384	0.508141	0.354605	2.96819	3.74473	0.0753753	0.214565	28.5066	24.4166
RchiOBHmChr4g0441051	3.72373	4.36764	3.93546	0.633615	0.325115	0.504796	232.05	226.263	36.3906	33.8195	3.50046	4.01518	9.88155	9.58074	9.74003	5.066	16.3604	15.8605	6.91354	6.12442	0.893879	0.695333	98.9714	80.7926	3.40486	4.20196
RchiOBHmChr6g0265751	6.92164	10.897	8.90668	1.25376	1.03735	0.950738	5.01694	3.94595	3.93612	3.22025	0.971865	0.978221	12.5622	11.439	0	0	0	0	0	0	0	0	0	0	0	0
RchiOBHmChr4g0402981	6.16178	11.7824	6.13066	1.1049	0.731349	1.15657	0.218547	0.300425	0.0458182	0	0.473839	0.237555	12.2735	12.0097	0.0708987	0.677596	70.2878	37.119	6.53724	4.47711	139.337	129.047	24.0278	34.0086	26.5032	28.7173
RchiOBHmChr4g0402961	18.4522	34.0381	15.5189	2.72152	3.2194	2.48061	0.129981	0.107207	0.0408757	0.0941033	0.798481	0.762948	29.3469	31.3048	0.189752	1.41051	136.441	80.7272	10.6157	6.57499	145.013	162.049	52.7837	56.6347	44.017	51.5564
RchiOBHmChr1g0344031	8.33877	6.94427	7.76419	0.986877	0.544357	1.40868	0.0361879	0.0298474	2.2988	2.30553	51.4439	55.227	0.216641	0.368263	0.316972	0.486197	13.403	5.09834	0	0	6.54099	6.2284	0	0.198751	0.289808	0
RchiOBHmChr7g0227961	6.98007	8.97483	8.49479	0.662902	1.11621	1.34464	24.9631	27.465	20.654	25.0083	25.1644	26.4034	22.7276	23.8724	34.3803	34.8906	24.3136	25.09	19.9687	23.6461	15.3329	13.1711	25.4314	27.0663	75.4554	82.5732
RchiOBHmChr2g0133031	1.10878	2.65498	1.41273	0.155081	0.285139	0.221363	0.181973	0.140709	0.0500728	0.0741064	0.00821966	0.0370877	5.4567	6.19593	17.8541	15.5273	1.87691	1.77592	0.596312	0.494661	13.3681	13.1905	1.3375	1.37422	18.9061	18.1002
RchiOBHmChr4g0440841	6.24828	3.88529	4.01215	0.635789	0.757508	0.399313	0.889656	1.66138	0.0105575	0	0.109183	0.0875807	0.244047	0.227761	0	0.0173481	0.0157394	0.0197074	0.016925	0.0158711	0.377116	0.400026	0.0154221	0.0460959	0.0768165	0.102432
RchiOBHmChr3g0475651	28.9364	42.7696	23.646	4.83838	3.47649	3.9984	15.1131	14.4733	90.1423	87.8056	15.2003	16.2359	5.95987	5.06959	1.71599	9.11117	336.359	267.432	295.96	275.626	108.762	88.9652	237.59	253.662	871.62	851.119
RchiOBHmChr2g0091391	4.64149	10.1924	4.96022	0.824363	1.10837	0.625123	0.18704	0.112195	0.139027	0.196964	0.466972	0.543388	7.59086	5.56021	0.0330969	0	0.3667	0.459149	0.0171444	0.144692	8.45624	8.05924	0.952947	2.07009	14.551	15.3772
RchiOBHmChr1g0317141	4.37252	6.28535	5.59061	0.704422	0.777112	0.642401	63.9951	60.1432	119.417	120.76	23.3817	23.3827	20.5334	20.2667	0.326807	0.680736	8.77977	6.97502	7.95658	7.11923	2.37401	1.20834	6.62117	6.07662	0	0.0945744
RchiOBHmChr2g0130471	6.93209	4.73878	5.98026	0.740639	0.571946	1.05719	0	0	0	0	5.40551	5.61131	0	0	0	0	0	0	0	0	0	0	0	0	0	0
RchiOBHmChr2g0119241	2.06326	2.96521	2.04067	0.217424	0.266511	0.48277	0.222917	0.919299	0	0.0806936	1.28884	1.16307	22.3053	21.5507	20.6102	14.5141	23.3056	32.4526	42.4803	51.2167	227.186	225.381	25.4983	36.9333	40.2949	34.6875
RchiOBHmChr3g0480671	2.50695	0.922055	1.81487	0.292197	0.161175	0.243299	15.6332	16.0778	23.9742	25.9896	79.0881	80.1814	1.32048	1.76766	20.9436	8.67674	10.9486	5.55153	8.85432	5.4745	44.05	31.9405	15.4269	19.6985	53.8767	60.3005
RchiOBHmChr6g0296941	3.8943	4.02834	6.90827	0.405927	1.07476	0.521481	0.0535859	0.0662956	0.0168514	0	0.0580909	0.017474	31.3004	29.3196	0	0	0	0	0	0	0	0	0	0	0	0
RchiOBHmChr5g0068321	241.998	140.641	174.455	27.9065	21.3189	26.3837	668.865	627.259	663.702	708.392	10720.7	10635.1	56.5192	50.1056	863.417	504.747	2068.13	1718.33	552.487	555.981	320.767	216.131	431.746	410.576	132.41	160.212
RchiOBHmChr5g0053121	4.04767	4.73265	1.97831	0.219663	0.302912	1.01903	0	0	0	0	1.57176	1.18198	0	0	0	0	0	0	0	0	0.111044	0	0	0	0	0
RchiOBHmChr5g0080061	1.11005	1.89789	1.25385	0.121123	0.289514	0.172892	0.0133244	0.0109898	0.0838038	0.106112	9.60084	9.05499	10.7002	10.2148	0	0	0	0	0	0	0	0	0	0	0	0
RchiOBHmChr5g0031081	2.55396	3.27635	2.71173	0.301098	0.636655	0.214895	0.298107	0.109278	0	0.0239803	0.311199	0.388843	0.594877	0.202244	0	0	0.0931734	0.427766	2.4046	2.41147	6.02082	3.94677	5.69073	3.09261	4.77472	9.33813
RchiOBHmChr1g0358491	8.34162	20.4573	12.3531	1.50103	2.0699	2.14258	0	0	0.233673	0.179319	0.716024	0.726919	158.129	179.211	0	0	0	0	0	0	0	0	0	0	0	0
RchiOBHmChr4g0426181	3.77068	9.40699	5.58487	0.947923	0.866469	0.773184	0.160758	0.0883941	0.0337028	0.038795	3.408	3.38996	23.2806	23.7393	3.07693	2.04908	1.20588	1.57281	3.07969	2.22928	627.874	670.381	4.82474	6.42566	295.063	318.165
RchiOBHmChr4g0429781	2.00722	2.46676	1.38888	0.385538	0.318991	0.082548	0	0.104943	0.06402	0.0368464	0.312647	0.481294	1.61046	2.17527	0.173362	0.131497	1.40778	0.92616	8.33883	9.2151	41.5263	46.0664	1.3794	2.84181	26.4056	22.9821
RchiOBHmChr2g0126321	12.1158	18.8825	13.7915	1.67933	2.98477	1.55366	12.1517	11.2415	9.81168	10.4917	20.4719	19.4648	20.5039	20.3037	257.303	135.344	129.415	129.17	150.919	155.379	65.3158	58.3014	78.4522	76.4347	805.202	808.511
RchiOBHmChr7g0197451	5.19987	7.65924	6.29147	0.878567	0.883706	0.922112	30.404	31.2618	1.32915	0.542893	0.246338	0.489059	104.009	105.678	2231.53	2119.45	112.819	95.4019	33.6114	25.7821	6.33497	4.63304	31.3158	24.9604	3.19763	0.915183
RchiOBHmChr2g0089061	3.60338	7.6273	5.07932	0.716883	0.673694	0.909585	0.525749	0.476995	0.85974	0.913512	0.303972	0.582907	34.3968	34.0631	2.91654	0.978039	0.295782	0.246901	4.92996	3.1317	75.9162	74.061	3.52613	4.52378	397.824	307.478
RchiOBHmChr2g0099411	22.7863	20.6246	22.2265	2.78232	2.40832	4.15481	27.4056	25.0506	28.716	31.1933	47.0248	46.029	5.55743	5.30946	5.33438	9.05178	30.3329	22.3569	39.4832	34.4602	14.5702	13.89	17.2099	15.6207	56.0809	46.2397
RchiOBHmChr3g0474421	3.08172	3.30614	3.2721	0.387962	0.608205	0.349756	74.3058	83.4612	66.0232	70.0323	61.4153	65.9074	44.7147	44.7284	0	0	0	0	0	0	0	0	0	0	0	0
RchiOBHmChr4g0439931	6.02474	25.3027	8.34923	1.80569	2.10269	1.81377	0.0772486	0.0728158	0.0555263	0.0159789	0.23129	0.230311	19.6779	19.4507	15.6591	22.7303	2.90764	2.69489	1.35748	1.21035	2.93003	2.62987	6.54972	6.78824	0	0.0134683
RchiOBHmChr7g0179471	5.63595	1.50417	3.6425	0.628337	0.404352	0.523188	13.1677	13.198	121.879	121.003	56.7241	50.3096	0.0591144	0.281364	612.27	1247.85	673.787	654.206	3754.28	3335.21	7.55275	4.88071	178.736	179.818	0.158159	2.15116
RchiOBHmChr4g0401341	21.7208	20.2221	21.3528	2.67977	3.19838	3.2936	106.284	109.777	124.527	129.977	52.2775	55.7033	17.334	17.8449	0	0	0	0	0	0	0	0	0	0	0	0
RchiOBHmChr1g0371181	1.37377	0.977437	1.18514	0.132098	0.14573	0.251411	31.6074	29.3441	16.3104	16.0967	12.4293	11.6838	1.65633	1.70811	0	0	0	0	0	0	0	0	0	0	0	0
RchiOBHmChr6g0294021	46.4998	82.4356	53.4963	8.32737	11.7237	6.5654	59.5424	66.125	3.32062	3.25606	21.4807	19.3208	600.194	633.986	10.2766	7.37628	11.3677	8.49425	5.52051	10.2611	469.56	495.94	193.757	228.931	29.6417	28.3991
RchiOBHmChr6g0301061	19.8826	37.5101	22.3968	2.88991	6.28107	2.46273	12.4697	12.1164	7.03705	5.44141	5.80226	6.2944	90.8663	93.753	0	0	0	0	0	0	0	0	0	0	0	0
RchiOBHmChr5g0064491	228.617	103.094	110.395	23.671	32.8991	8.08788	53.7364	50.8354	64.763	74.5481	26.2996	28.3065	0.568144	0.500772	12598.8	13570	11996.2	5049.97	2803.96	2084.3	3006.6	2553.04	13914.7	14662.9	1340.35	1153.55
RchiOBHmChr5g0084141	0.54048	4.11482	0.901793	0.313478	0.218416	0.282607	0	0.0808767	2.59028	2.76867	33.3549	36.5165	0.922471	0.709599	0	0.0337804	0	0	0.0659131	0	5003.63	5240.66	5.43545	11.4293	0.0747891	0.239348
RchiOBHmChr1g0357531	12.564	15.5467	14.9835	2.10109	2.06036	2.22157	0.102727	0.677824	0	0	1.18787	0.401983	29.8705	30.0376	0	0	0	0	0	0	0	0	0	0	0	0
RchiOBHmChr4g0392901	2.8115	3.47709	3.38858	0.627834	0.358252	0.432636	0.0571583	0.20036	0.116836	0.0517267	0.206545	0.149112	5.78042	5.76819	1.05694	0.354435	0.20098	0.0671064	0.0720396	0.16213	5.53051	6.55845	0.971513	1.02026	0.114437	0.331354
RchiOBHmChr2g0142091	1.22166	2.5565	2.59425	0.391573	0.143993	0.4192	0	0	0	0	0.0155657	0.0140468	2.7077	2.9516	0	0	0.343316	0.733307	0	0.0203641	0.857778	0.47525	0.217668	0.216866	3.10472	2.07658
RchiOBHmChr7g0214051	5.46114	3.65053	3.75197	0.399387	0.550749	1.03328	0.3622	0.488844	1.32541	1.28728	18.7996	16.8362	118.554	116.117	3.26867	11.7063	0.370492	0.850476	1.162	1.5255	1.10962	1.24969	0.605038	0.693232	0	0
RchiOBHmChr3g0449301	47.6542	26.6182	35.7845	6.28494	4.48075	5.74265	1.89258	1.98003	19.4048	18.4377	133.373	134.184	0.217258	0.249901	0.173065	0.065636	0.0119099	0.0745626	0.0256141	0	4.21558	2.04041	3.25588	2.48815	0.0581267	0.170521
RchiOBHmChr5g0053311	6.0479	19.1999	7.13501	1.43593	1.71084	1.72171	0.303289	0.125075	0	0.0548936	0	0.0989006	75.4146	77.5713	0.0737925	0	0	0	0	0	0	0	0.0696617	0.277621	0	0
RchiOBHmChr2g0095581	5.87668	8.15542	3.11986	1.42098	0.510386	0.613213	4.27513	3.65201	13.1698	14.3227	4.11433	3.98312	0.018654	0.118382	0	0.743897	64.3828	51.2418	37.8051	30.8522	10.3129	7.48896	66.9325	69.9405	114.265	127.937
RchiOBHmChr7g0228391	2.10597	8.75012	4.0072	0.552489	1.00273	0.686869	0.823442	0.194047	0.110979	0.0425824	0.127524	0.0383599	360.664	328.763	18.2032	23.5245	88.2402	82.1053	255.483	258.594	20.9622	19.0524	18.0488	23.6355	1375.42	1104.17
RchiOBHmChr7g0202891	12.3547	26.6461	16.3088	2.56866	2.57134	3.25913	0.125235	0.103292	0.157532	0	0	0.408382	145.982	145.966	9.62868	12.0368	0	0	0	0.118409	0.255777	0.884286	14.1523	23.8442	0	0
RchiOBHmChr6g0260301	2.09206	2.63619	2.75871	0.432619	0.540896	0.123505	0	0	0.059865	0.027564	7.74571	8.26863	9.24729	8.74337	0	0	0	0	0	0	0	0	0	0	0	0
RchiOBHmChr2g0167951	11.1655	19.3881	13.7544	2.0616	2.93875	1.71935	0	0.0504416	0	0	0	0	11.5066	10.9535	0	0	0	0	0	0	0	0	0	0	0	0
RchiOBHmChr2g0172191	1.69402	3.59226	1.43893	0.398183	0.399337	0.20668	0.453958	0.610895	13.3892	11.9181	1.81308	2.13479	0.510836	0.632165	2.95312	5.43238	123.082	95.6816	112.647	115.505	16.6888	17.8196	52.7928	56.0977	193.692	193.182
RchiOBHmChr3g0455241	14.346	9.2408	11.4894	2.31227	1.85518	1.10018	0.184994	0.0381452	0	0	2.54025	2.83529	8.74114	10.0718	0	0	0	0.217191	0.0466314	0	0.61397	0.285742	3.2293	1.82038	1.64024	1.29821
RchiOBHmChr2g0164751	2.35766	2.31479	2.10804	0.287882	0.317589	0.45418	8.38937	6.98535	5.578	5.0325	6.29408	5.263	4.37319	3.52335	1.39968	2.06436	111.776	103.466	290.42	337.154	20.3164	17.8418	54.2477	53.7555	12.9801	9.36117
RchiOBHmChr2g0142121	2984.81	3329.79	3521.75	448.298	567.855	500.373	4.90949	4.10401	4.17273	3.36223	1308.21	1292.4	6503.23	6657.77	0	0	0	0.623131	0	0.501829	1988.95	1937.91	185.483	240.125	1.13853	2.67201
RchiOBHmChr2g0095841	9.74791	14.5447	9.07709	2.13867	1.4746	1.52637	0.64699	0.824701	0.295945	0.340659	4.2508	4.56482	7.24346	6.26481	0.915883	1.09416	1.2133	1.17392	6.99792	6.06168	610.727	627.691	1.62115	2.0459	0.471033	0.574267
RchiOBHmChr6g0266031	5.57768	12.5667	9.18778	1.29211	1.86782	1.08118	0.117635	0.291071	0.258952	0.127747	1.19022	1.22752	444.014	436.182	34.8608	20.1205	3.30901	2.76216	1.00817	0.667341	415.941	405.24	36.4759	43.8791	80.1429	84.3454
RchiOBHmChr2g0093301	3.84341	15.3521	4.46267	1.07582	1.6425	1.00091	25.9532	29.0445	41.1129	39.7621	27.707	30.4112	1256.68	1291.55	0	0	0	0	0	0	0	0	0	0	0	0
RchiOBHmChr1g0319101	5.81624	5.57004	5.53807	0.577319	1.55685	0.503597	0.0423395	0.0523817	0.399441	0.38316	63.264	60.7906	33.4215	32.1281	0	0	0.0396997	0	0	0	0.064855	0.0934253	0.194497	0.232537	0.0968778	0
RchiOBHmChr2g0156651	2.11627	1.8336	1.59655	0.238007	0.367593	0.271786	3.36183	5.0014	3.90278	3.96928	2.79295	2.9712	1.46443	1.17235	0.947914	0.860484	6.51067	7.30367	20.5914	22.5325	13.235	14.6005	16.9589	17.5579	2.2286	2.33905
RchiOBHmChr6g0283581	4.79992	3.81426	4.52563	0.590784	1.05004	0.421644	18.5006	19.3866	31.3789	30.4111	50.1947	44.3075	11.9315	15.9464	0	0	0	0	0	0	0	0	0	0	0	0
RchiOBHmChr4g0394921	8.78942	8.18944	7.52287	1.38923	1.33915	1.23215	17.2077	20.6439	21.3995	23.9249	101.044	107.635	50.0022	36.2164	6.66074	2.42508	7.88405	7.11681	5.12619	4.807	187.504	159.474	2.51515	2.86388	1.56598	0.238648
RchiOBHmChr5g0031251	1.23603	6.54153	1.31238	0.613437	0.413562	0.437812	0	0	0.113068	0.0650755	18.4816	19.4627	1.38371	1.18913	0	0	0	0.0527651	0.0906305	0	3112.58	3161.98	2.76652	8.55699	0	0.383954
RchiOBHmChr2g0088191	19.8927	24.1281	19.1605	3.93373	3.42604	2.84446	0.512062	0.506811	2.42619	2.84219	6.09388	6.03354	1.98527	3.14973	0.797366	1.02314	20.9659	23.4862	3.61412	4.97065	0.522912	0.451961	18.9437	18.5302	3.20253	4.54126
RchiOBHmChr6g0286881	28.3338	18.4791	23.5809	3.76676	4.01459	3.67559	3.64519	6.35993	11.9041	9.94714	273.271	246.513	9.47225	11.4138	0.818679	4.34684	7.49314	6.09022	11.4502	6.23026	58.9863	57.4174	26.5345	27.9769	0.320794	0.513319
RchiOBHmChr2g0102851	24.3306	15.7499	27.5903	3.70174	3.02837	4.39334	78.4055	79.6122	68.7896	76.639	170.708	169.089	11.6452	12.3669	31.6341	35.4085	54.1596	62.2701	29.1196	25.3337	83.3189	88.006	120.966	138.011	27.2619	32.9687
RchiOBHmChr7g0213921	27.8435	54.6817	32.7978	6.82063	7.03901	4.92025	21.2014	25.9802	17.9065	15.7002	39.8385	37.2151	490.908	507.124	21.3413	17.0283	26.9226	23.1845	25.7745	22.6805	122.852	119.228	36.2862	34.9327	45.7392	53.0811
RchiOBHmChr4g0437871	14.2361	34.9832	18.7944	3.46785	4.50281	3.41683	3.85039	4.01149	0.254916	0.33011	0.366148	0.264334	96.0586	101.601	24.9492	12.3569	18.6217	17.9037	19.769	21.0768	3.20767	2.19112	55.856	46.7463	6.08596	3.89539
RchiOBHmChr1g0343411	1.9713	4.3032	1.60059	0.396456	0.437367	0.495167	0	0	0	0.0473623	0	0	14.6025	13.6254	0	0	0	0	0	0	0	0	0	0	0	0
RchiOBHmChr2g0157361	9.188	31.3194	9.13085	3.13359	2.38999	2.8715	0	0	0	0	1.47465	0.898253	4.40619	3.97982	0	0	0	0	9.77233	11.3825	13.9085	4.63744	7.12367	9.75898	0	0
RchiOBHmChr7g0178121	2.47442	3.26536	2.04895	0.372449	0.454905	0.512649	0.0702102	0.0868629	0	0.0254153	0.177596	0.137371	0.0600453	0.0714488	0	0.217684	0.197498	0.24729	0	0	0.035849	0	0.0322528	0.0321341	1.04422	0.342751
RchiOBHmChr7g0243471	91.6724	131.759	109.446	20.6104	19.3423	16.906	0.477924	0.29564	0.429414	0.531367	0.604453	0.690184	61.9666	58.6984	0.0498354	1.0055	8.56242	5.67116	2.16847	1.56543	14.1709	10.7868	9.39345	8.34329	14.3919	13.9779
RchiOBHmChr2g0116041	11.0396	11.1622	10.7351	1.44809	2.37051	1.86698	1.94243	1.06807	1.51257	0.669656	12.8349	13.4525	883.528	908.466	0.450104	0.86035	0.433649	1.41174	4.66314	0.787102	22.1029	34.1257	5.60878	6.94283	0	0
RchiOBHmChr2g0173671	1.30673	8.47269	1.8169	0.718012	0.938789	0.341632	0	0	0.0110397	0	3.56461	3.78914	0.150113	0.404876	0	0	0	0	0.0176979	0	743.186	798.618	1.04822	2.6832	0.120487	0.021422
RchiOBHmChr3g0462061	300.582	401.044	350.975	59.473	69.8851	54.0852	0.106574	0.0293004	0.122888	0.115736	45.3534	42.1555	198.999	200.206	0	0	0	0	0.0179094	0	26.8272	18.0135	20.8069	28.0306	0.0203212	0.130068
RchiOBHmChr6g0264551	10.2695	5.87632	7.39038	1.53261	1.12205	1.51147	5.1683	5.05918	3.54558	3.45544	5.44993	6.04567	0.212351	0.274516	5.9518	6.47238	5.71698	4.12438	1.28887	1.82596	2.49804	2.06169	21.4437	17.1642	0.578659	0.639742
RchiOBHmChr6g0277421	4.04651	6.2873	3.45403	0.610358	1.04742	0.871229	43.6918	37.0661	4.82301	4.51884	0	0	17.5392	13.3085	0	0	0	0	0	0	1.4569	1.25922	0	0	0	0
RchiOBHmChr2g0121021	3.6936	5.46452	4.469	1.02788	0.971953	0.4192	12.3574	13.5896	7.92456	8.24478	10.682	12.8001	21.7583	22.3562	0	0	0	0	0	0	0	0	0	0	0	0
RchiOBHmChr4g0429831	3.89638	4.90321	3.77612	0.871709	0.715081	0.701903	42.4015	41.3441	23.9978	25.8305	11.9337	12.8076	4.13566	3.04067	6.48554	14.8103	121.264	158.414	79.797	59.1601	9.27427	6.14204	43.9411	50.689	0.539748	0.287893
RchiOBHmChr2g0162351	320.203	264.452	302.892	58.5252	43.7146	61.7233	1632.44	1609.93	16499.9	16363.5	6430.11	6255.15	32.2369	28.5774	0.215513	0.0254285	1.89178	1.35768	0.545784	0.488536	1379.21	1350.89	167.823	172.43	0	0.4204
RchiOBHmChr7g0213971	52.4306	69.9537	64.4752	11.1711	11.9554	11.6282	0.0367446	0.0909197	0.046221	0.0532046	0.424893	0.423371	107.777	109.303	51.0428	45.8107	0.0229691	0.230079	0.0246993	0	22.6265	22.2915	2.80201	4.26041	0.798723	0.852053
RchiOBHmChr7g0198121	2.452	2.56559	3.17298	0.545784	0.28901	0.716732	1.72916	2.04421	1.48632	2.18034	1.66625	1.2969	1.47882	1.32952	0	0	0	0	0	0	0	0	0	0	0	0
RchiOBHmChr7g0192621	113.71	203.862	136.82	26.0682	31.4314	27.7791	14.8737	12.8238	35.4397	35.9392	16.4896	18.57	668.664	660.546	221.435	59.3574	63.4083	67.606	62.4049	51.2575	123.5	133.594	62.2333	66.3253	90.5681	103.611
RchiOBHmChr6g0252981	6.5056	15.7444	9.96131	2.1657	1.93717	1.92164	7.19838	7.56507	4.38137	3.95062	8.05527	8.78361	153.111	146.35	2.48588	5.39959	10.8864	10.4959	2.10716	1.42708	258.349	261.928	17.3871	16.0478	8.89951	8.92693
RchiOBHmChr5g0006751	12.9494	28.8503	18.376	3.72451	3.94635	3.63437	22.1665	18.4893	53.8761	57.4829	61.5458	60.2771	757.542	735.775	35.5895	26.6622	97.1117	109.097	15.5314	16.6957	1463.3	1483.61	161.313	218.266	14.3276	9.93474
RchiOBHmChr1g0381731	4.03627	10.3136	6.54119	1.72497	0.901408	1.29591	0	0	0.263824	0	1.90555	1.83684	3.84363	2.92709	0	0.619308	0.786631	0.492474	0.241681	0.113316	363.92	378.698	2.14715	1.48102	1.23402	0.731341
RchiOBHmChr3g0463631	20.3787	19.4455	22.4635	4.45433	3.37377	3.9857	2.98393	3.76406	3.4499	4.00291	16.6814	17.0569	8.7441	7.97845	0	0	0	0	0	0	0	0	0	0	0	0
RchiOBHmChr4g0442131	7.40056	6.71397	5.56015	1.47966	0.938596	1.32004	37.9351	34.4334	42.2456	50.0442	15.1213	15.4949	1.5887	2.58688	2.56914	6.77001	85.8078	70.9385	0	0	0.499213	0.94925	33.6851	39.1098	50.1113	56.6789
RchiOBHmChr6g0251961	2.45283	1.84163	3.69345	0.57178	0.756938	0.163233	20.3796	23.9059	25.6038	28.9258	12.692	11.8801	3.16305	3.17487	0	0	0	0	0	0	0	0	0	0	0	0
RchiOBHmChr4g0423411	1.06463	0.967545	1.03351	0.181995	0.157752	0.259781	23.0649	29.6514	28.2839	29.6654	11.7337	11.0088	0.440795	0.611926	0.250809	1.59803	3.62461	2.57176	7.01574	3.77677	150.006	163.658	0.947077	0.471795	1.47417	0
RchiOBHmChr4g0394191	3.98707	6.7319	5.91587	1.13597	1.10859	0.935472	8.92822	6.08115	3.87644	3.8783	1.4154	2.06618	60.4445	57.7578	8.74527	9.04862	1.56629	4.12522	0	0	1.11762	0.508407	12.3307	17.1888	2.89958	6.60815
RchiOBHmChr4g0434161	2.57819	2.52183	3.2911	0.495207	0.655569	0.45946	1.12684	1.53553	0.61628	0.673925	4.5676	4.72897	0.293298	0.0332381	0.858263	2.12661	164.229	146.79	88.0283	98.2042	1.65102	1.47025	0.945256	0.807236	1.06496	0.239173
RchiOBHmChr4g0387631	18.1713	26.1923	21.6748	3.99858	4.95804	3.86796	1.09059	1.51118	0.685928	0.884313	14.5972	12.5184	196.8	202.463	18.9354	30.0264	20.452	18.7963	29.47	27.0575	1339.12	1349.98	102.403	117.639	1.09798	1.75694
RchiOBHmChr1g0359481	6.37238	8.09469	5.43063	1.29001	1.42312	1.15085	4.72283	2.18139	3.20805	4.65014	26.6233	27.7215	141.69	125.857	0	0	1.59421	1.55255	0.76191	0	410.14	393.174	12.6702	25.5929	0	0.230558
RchiOBHmChr2g0142081	323.146	283.318	336.087	61.8485	63.9219	58.1776	1.63554	1.74867	0.457186	0.438552	235.835	187.616	1048.7	782.015	0	0	0	0	0	0	137.574	165.85	19.4788	34.8218	0.346509	0.369645
RchiOBHmChr1g0321551	1.36369	5.66941	4.01801	0.990756	0.514349	0.665512	22.2917	20.196	69.3754	68.7359	60.1015	67.1176	36.6471	44.508	0	0.716215	0.9747	1.22043	1.51395	5.46032	1464.33	1367.69	407.913	321.83	0.924982	0
RchiOBHmChr2g0175241	1.14133	2.59859	1.6481	0.370705	0.430482	0.250648	34.0181	34.9525	13.5092	10.507	63.6869	61.7124	17.4757	17.0137	23.2769	22.9183	142.939	168.206	33.1292	34.2499	3295.46	3457.33	333.769	308.84	9.03234	14.8782
RchiOBHmChr4g0430311	6.14131	6.72488	7.50494	1.78275	1.20188	0.989607	4.30192	3.65569	5.32938	4.05827	23.2708	23.2104	5.12843	5.21799	0	0	0	0	0	0	0	0	0	0	0	0
RchiOBHmChr6g0303551	22.0388	18.9453	24.0439	4.45025	3.42991	5.17757	0.302056	0.14948	3.19163	2.84286	89.0227	87.1515	0.154995	0.368862	0	0	0.113289	0	0.0609115	0	41.2098	31.6725	10.4345	17.7508	9.19217	9.28982
RchiOBHmChr7g0209361	4.76272	7.18588	5.05694	1.05541	1.82964	0.430429	0	0	0.563319	0.396263	52.9706	49.3916	53.4484	53.4717	0	0	0	0	0	0	0	0	0	0	0	0
RchiOBHmChr2g0108341	1.49751	2.125	1.93074	0.292566	0.363101	0.469813	11.4354	10.6257	14.4983	15.3003	19.5105	19.2822	5.29223	5.6958	0.176096	0.336598	101.252	99.6301	208.344	217.612	248.964	278.202	105.661	143.465	109.713	122.736
RchiOBHmChr2g0108571	16.4153	22.0498	13.3419	3.60081	2.12317	4.78535	3.19624	2.83901	2.835	4.15335	16.8213	17.3178	40.0212	41.8671	42.7519	37.0984	27.8948	35.7933	46.8533	41.3013	133.739	112.989	45.6294	53.1134	95.1678	98.3213
RchiOBHmChr4g0433921	1.16142	1.82025	1.07574	0.14785	0.349514	0.331637	2.17073	3.37421	1.05022	0.544002	1.81017	2.83145	5.71218	5.94737	0.406273	0.862856	0.234853	0.882185	0.673449	1.18409	14.5793	12.9695	11.8127	9.62939	1.24172	1.73221
RchiOBHmChr3g0469001	15.8725	11.3321	15.1482	3.0584	2.49445	3.02233	45.3861	44.7798	47.3859	49.3534	125.61	127.232	3.60917	3.88183	9.60022	9.73975	8.32678	6.07932	26.7837	24.9201	45.9248	45.9092	24.8335	21.4953	1.83646	1.5483
RchiOBHmChr4g0403691	5.46577	6.86277	6.52884	1.07062	1.50321	1.25035	0	0.158957	0.0404045	0.0465093	0.23214	0.502769	6.26323	5.6658	0	0	0	0	0	0	31.2925	31.696	0	0.411631	0	0
RchiOBHmChr2g0151401	28.2653	44.5197	27.8804	8.18418	6.42654	5.71354	0.0707675	0.116736	0.0445091	0.051234	0.56259	0	153.06	146.72	0	1.38961	6.10468	8.39149	13.5572	15.2556	202.781	197.753	2.99081	2.72068	3.31945	3.10924
RchiOBHmChr6g0303741	1.36759	1.52635	1.184	0.233786	0.317429	0.282368	7.24006	9.42871	6.47094	7.03483	8.95029	8.3254	12.8725	11.1163	201.189	74.0375	71.4595	80.5276	4.99475	8.10648	86.1923	79.8786	118.682	115.804	141.248	151.144
RchiOBHmChr3g0453761	14.3402	24.986	18.8409	3.26268	5.05855	3.52434	2.20595	2.48977	1.09534	0.672447	0.755181	0.454325	77.2505	78.0584	0	0	0	0	0	0	0	0	0	0	0	0
RchiOBHmChr6g0246791	2.6142	5.26135	2.47992	0.769236	0.686973	0.653579	6.17607	5.49192	24.5812	25.6403	38.6374	36.9439	59.0088	58.7911	0	0	0	0	0	0	0	0	0	0	0	0
RchiOBHmChr7g0190281	3.31028	2.09287	1.9504	0.408876	0.487153	0.630323	4.0177	4.06202	7.17322	9.00766	64.0675	61.0274	0.11084	1.75853	0	0.535773	0	0.30432	0	0	344.241	350.839	2.02424	4.62675	0	1.26539
RchiOBHmChr6g0292431	6.98809	13.0951	7.14498	1.47481	2.03374	2.10515	0.0973439	0.20072	0.765304	0.775222	4.0804	4.66625	4.20416	3.46714	0.426321	0.855132	8.16909	3.25715	8.68628	5.89047	27.9333	29.0405	4.78476	5.21267	16.7051	15.1474
RchiOBHmChr2g0160821	1.44871	1.52177	1.47789	0.388476	0.267852	0.2426	1.15302	1.78312	1.69211	1.91299	1.77077	2.03663	0.123261	0.260747	0	0	0	0	0	0	0	0	0	0	0	0
RchiOBHmChr5g0038161	2.85021	2.04258	2.54845	0.435948	0.650674	0.439253	20.3622	21.3177	12.8387	11.3228	13.2114	12.5514	0.0434269	0.137798	9.63673	14.3792	11.9031	11.6848	7.01426	8.69	0.829672	0.134456	12.8295	11.8991	0.290468	0.185917
RchiOBHmChr2g0138231	11.3029	22.3134	13.6726	2.63726	4.48286	2.57365	4.33056	3.01554	1.76371	2.46707	3.15541	3.31049	100.452	99.1445	10.2257	13.7569	5.55831	8.37654	3.54325	3.59112	47.8119	52.1334	5.41365	5.19876	38.4983	30.8016
RchiOBHmChr7g0208891	29.2739	45.938	35.3552	7.86637	8.40591	6.42221	12.7998	11.0316	20.0205	21.9348	39.1503	43.0837	110.942	107.034	54.3541	17.9847	36.0502	23.3011	0.0483363	0	1108.1	1141.51	6.91494	9.47852	128.777	128.775
RchiOBHmChr3g0475641	11.9931	24.6193	12.9235	3.29494	2.62524	4.35483	2.47686	2.67402	11.8166	11.5027	2.56139	1.79924	2.10104	2.52738	1.70503	2.49737	74.4878	53.0049	45.7852	43.2199	47.5229	40.6482	68.7495	73.5654	229.712	216.984
RchiOBHmChr1g0360721	535.73	993.129	652.958	146.863	158.183	146.349	1.79208	1.92873	1.80066	1.56641	1.64264	2.46582	3740.42	3747.75	4.16884	5.10455	37.48	27.2235	0.0440713	0.268626	486.862	485.615	611.364	564.962	6.55079	7.36159
RchiOBHmChr3g0485761	2.34412	1.02597	1.33393	0.353577	0.187808	0.44862	209.853	218.28	153.963	156.921	77.7052	76.2082	0.620701	0.492387	31.3316	29.2532	92.5517	95.4955	41.0324	41.5165	11.4879	7.41258	90.9241	93.0095	30.7816	31.0021
RchiOBHmChr4g0442421	2.49253	1.40876	1.35718	0.355075	0.391716	0.350887	50.9616	53.5433	74.1134	76.6703	61.0192	61.8602	0.270034	0.599792	6.20735	4.43796	32.3299	30.3233	11.3974	8.59792	19.8622	17.0557	75.5981	68.5566	3.03436	1.77262
RchiOBHmChr1g0360491	31.8313	52.6731	41.1542	8.96898	8.9003	8.33074	13.511	13.0127	16.372	17.5127	6.40736	8.55308	15.7457	16.9681	66.9044	102.955	28.6837	56.8324	9.42465	5.27591	2.14046	2.42504	62.4565	66.3232	8.84669	11.6152
RchiOBHmChr2g0085131	5.21154	13.5013	7.57919	2.07876	2.02523	1.34875	6.19611	6.37342	2.95637	3.50618	2.41915	2.57789	8.74039	7.9482	123.655	142.867	51.7873	47.3679	40.4287	35.6555	0.618195	0.597175	29.9683	33.3784	0.448137	0.17384
RchiOBHmChr3g0469541	24.4444	73.624	24.9768	9.03956	9.70923	6.97927	45.8429	41.0828	18.9315	20.0138	12.0601	10.3494	352.422	349.673	413.614	387.355	17.4183	15.5255	7.6191	5.00128	51.38	59.304	29.1009	28.1291	560.275	481.252
RchiOBHmChr2g0123301	5.03048	8.92551	8.85642	2.02124	1.33789	1.41634	0	0	0.229091	0.0527409	1.21092	1.14027	130.709	127.757	186.251	126.183	3.0055	3.50664	1.24869	0.895421	293.776	264.91	7.63001	10.6027	0.0833434	0.0889081
RchiOBHmChr5g0066401	10.329	23.5261	11.1817	3.47093	3.59077	2.44638	34.1268	33.0869	45.1103	47.6591	21.641	20.6761	56.5835	57.8169	102.646	16.505	61.8144	63.6709	65.9914	59.8151	226.67	241.306	65.5901	70.5696	249.43	276.526
RchiOBHmChr5g0077141	7.51072	19.043	8.66815	3.27962	1.30866	2.8885	0.138172	0.0379876	0.811096	1.06702	20.4377	22.7688	5.98717	5.8431	0	0.428397	0	0	0.603704	0	4209.29	4127.27	6.47422	11.4673	0.0526923	0.674526
RchiOBHmChr6g0294811	343.805	476.699	369.997	85.9419	88.7855	79.0816	39.3132	33.5999	59.0379	57.8003	141.495	143.898	521.134	537.53	19.1997	49.8303	237.534	203.184	67.2855	53.4665	49.601	30.1102	68.3121	67.6694	1.87403	0.347679
RchiOBHmChr4g0442711	1.07728	1.03057	0.558295	0.208273	0.133022	0.234703	4.1399	2.84147	5.66278	5.67999	2.19689	1.96363	0.321866	0.117844	0.112701	0.299198	5.56479	6.05003	0.11676	0.0821176	0.0591276	0	4.86745	5.93604	1.85477	1.55462
RchiOBHmChr6g0289711	6.31188	10.8986	7.45312	1.74188	1.78818	1.76118	1.91072	1.36582	0.801164	0.829991	0.0920602	0.0830765	130.074	146.912	14.3807	22.2484	7.04693	20.0399	0.256873	1.20439	12.6178	11.9176	1.75547	2.56522	0	0
RchiOBHmChr5g0064941	19.0784	21.0843	21.8458	4.59634	4.40925	4.33587	15.8098	12.5181	12.2803	10.0152	24.5086	25.9319	52.4609	54.4332	0	0	0	0	0	0	0	0	0	0	0	0
RchiOBHmChr4g0436791	18.6453	14.0725	17.6718	3.67773	2.97233	4.26892	62.7155	65.5385	59.0332	54.2076	87.6444	91.6823	33.9328	34.3712	25.2243	24.2508	49.2045	45.4557	22.799	19.9675	80.6002	76.4421	73.6908	65.6089	10.25	14.4491
RchiOBHmChr6g0286011	44.7102	55.2783	45.5535	10.8409	10.7588	9.82637	1025.96	1012.32	742.64	725.961	696.458	693.638	397.961	426.984	520.529	407.143	803.012	1139.05	815.336	852.547	531.982	536.239	1326.6	1317.3	896.962	883.86
RchiOBHmChr4g0394211	2.15169	3.68017	2.04725	0.429927	0.764135	0.5114	2.01507	3.22014	3.96056	3.28245	5.82528	3.90155	43.4065	43.5757	1.16442	0.846037	2.47989	3.69654	0.0634925	0	1038.15	1062.91	4.39695	3.74671	0.432256	1.92132
RchiOBHmChr7g0230701	7.15589	9.95426	4.95518	1.77287	1.17349	1.89795	0.40956	1.0134	1.32476	0.889536	2.49481	1.60266	3.60272	3.88999	4.66926	4.29322	41.5844	36.1318	4.48347	2.87663	4.06289	3.8731	12.0411	12.4252	15.998	15.4238
RchiOBHmChr4g0420181	0.692657	1.65154	0.902593	0.215287	0.26719	0.230477	0.0888117	1.09876	0.167574	0.385786	2.75997	2.60648	52.1802	51.6965	0	0	0	0	0	0	0	0	0	0	0	0
RchiOBHmChr2g0092361	3.50877	8.88423	5.22685	1.38763	0.913554	1.59735	65.8419	72.8134	46.5179	46.7061	20.805	18.2933	21.9682	21.6334	0	0	0	0	877.471	874.479	525.685	515.468	17.361	22.7024	640.448	503.94
RchiOBHmChr6g0291351	4.17684	4.98802	4.39052	0.892525	1.22093	0.866317	18.6354	21.6935	20.1033	16.6511	29.0671	27.4614	11.0957	10.8024	11.1345	5.11961	2.7648	2.0771	5.70828	4.12615	87.4431	90.0486	4.55123	6.69375	414.256	380.882
RchiOBHmChr5g0036121	8.46706	17.5618	9.57354	3.15956	2.56709	2.1331	1.6909	1.90601	3.11958	3.4685	3.42171	3.45539	21.9084	22.121	5.40318	6.93186	142.957	127.913	163.103	169.308	546.655	590.335	5.69623	6.1654	8.09264	7.70432
RchiOBHmChr4g0440171	73.8456	63.3983	83.0732	17.2225	15.3614	16.3454	1.10854	0.847816	1.02681	0.437759	8.43399	7.45322	0.948049	0.943498	0.608087	1.45812	0	0.0236632	0.264189	0.36208	0.0205824	0.0355793	0.296283	1.16232	0	0
RchiOBHmChr7g0196641	5.73988	22.3644	7.78132	2.54065	2.7545	2.68864	1.56129	1.21619	3.98244	2.32347	10.8448	10.126	305.253	315.059	164.949	215.502	7.97038	14.3587	215.668	237.832	689.035	721.634	144.4	141.327	195.987	182.29
RchiOBHmChr6g0296521	40.3536	70.1002	48.7896	11.7431	15.1035	9.01538	158.752	150.332	237.797	234.043	643.474	647.044	735.362	727.758	319.044	107.693	174.346	237.596	27.3242	20.333	5426.52	5228.32	947.486	1033.54	31.9039	49.5041
RchiOBHmChr4g0438411	65.0691	56.328	69.9705	13.9901	15.5348	13.629	17.4319	17.1661	20.2664	23.9404	284.568	275.954	223.261	224.198	18.4048	19.8719	22.1897	41.7999	23.222	23.5741	289.892	298.301	133.366	129.781	23.9318	23.3378
RchiOBHmChr3g0486641	1.42363	2.82108	1.51157	0.397331	0.76708	0.106341	40.3515	37.8272	8.60412	8.33656	7.11282	9.56389	98.7308	100.121	138.024	60.9268	240.118	194.004	58.6469	61.0903	834.433	930.388	6.37474	7.7026	1.85784	1.56149
RchiOBHmChr6g0247641	2.15155	4.31586	1.51268	0.447326	0.657981	0.709463	1.0826	1.28526	0.804702	0.688775	0.296367	0.727454	6.00409	6.77712	0	0	0	0	0	0	0	0	0	0	0	0
RchiOBHmChr1g0348541	4.57799	3.57163	4.38887	0.911761	0.670564	1.30145	0	0	0.015771	0.0363076	0.779249	1.03028	12.6953	13.15	0	0	0	0	0	0	0	0	0	0	0	0
RchiOBHmChr3g0470831	13.9573	17.1133	15.7737	3.81658	3.23063	3.56335	1.4576	0.797118	1.08616	1.16997	1.9351	2.20091	11.2869	10.6841	0.200451	0.458473	1.8421	2.1205	2.31633	1.75266	54.4268	55.4602	3.85739	3.95921	2.44699	1.37286
RchiOBHmChr3g0450201	2.38136	2.03436	1.62321	0.603092	0.360384	0.39456	0.0829306	0.0410401	0.062591	0.024016	0.227753	0.378604	0.0141848	0.0112525	0.193705	0.291406	0.186624	0.681549	0.38464	0.235233	0.0169376	0	1.1886	1.62452	0.417461	0.384607
RchiOBHmChr3g0456351	2.37078	2.62078	1.53431	0.559669	0.53226	0.385664	6.11431	6.703	9.37362	10.6423	4.06906	4.6689	2.37488	2.81726	0.619857	1.00052	10.2718	11.1565	0.154124	0	0.104065	0.314806	9.31572	11.3336	5.91672	4.75714
RchiOBHmChr3g0480971	271.297	425.926	329.847	77.6454	85.3683	72.078	6.27632	6.39047	4.92755	5.17066	5.09906	4.14979	31.0953	28.7196	0.842524	2.86301	58.4442	54.4773	3.49147	4.01074	114.307	79.1217	12.9246	12.1638	8.36897	9.50885
RchiOBHmChr4g0437821	76.0213	54.5495	51.6726	14.214	16.4713	10.9971	2.06953	2.48723	2.38012	2.99658	32.1356	30.735	39.039	38.1894	2.12922	3.66657	72.2973	73.9327	144.755	104.713	556.604	488.544	42.0476	49.362	4.66767	3.46388
RchiOBHmChr7g0197531	3.30611	2.35437	2.3184	0.769728	0.616511	0.421425	43.4132	43.8046	25.7975	27.5569	16.3522	18.8636	8.34067	5.74686	54.9968	30.2377	29.2104	22.3112	8.14768	5.21652	1.93495	2.1151	36.0458	28.3631	14.728	14.8272
RchiOBHmChr7g0210241	47.3647	22.0971	27.4394	8.35276	6.52484	7.37421	8.34348	7.14427	7.97159	9.17601	124.696	121.167	2.12432	1.77159	19.1536	9.54442	150.613	117.622	94.9787	104.481	28.8129	25.2969	35.3436	31.5988	331.759	340.074
RchiOBHmChr2g0091201	0.955038	1.87726	1.52862	0.304592	0.241936	0.469558	0.418171	0.424496	0.343934	0.209594	2.23176	2.20279	4.07147	4.62647	0.250447	0.332442	2.20179	2.0771	0.681102	0.912417	34.4911	37.3917	2.1574	1.26612	0.588816	1.64884
RchiOBHmChr6g0284881	8.60627	22.6369	10.5297	2.8304	4.2446	2.54612	11.0875	11.7439	3.74366	4.39379	0.253045	0.279096	72.1652	71.4729	15.107	19.6609	69.3082	77.2812	52.0526	55.3589	1.82749	0.480724	13.0103	12.4995	17.1801	17.5675
RchiOBHmChr2g0151371	104.799	157.962	101.179	33.8001	22.6647	27.8227	1.33644	0.793639	6.32094	7.12116	2.74304	1.77808	81.4694	86.3879	11.3417	27.0161	77.4924	51.276	30.0763	25.3225	85.2699	69.2176	62.1292	70.9531	100.3	102.495
RchiOBHmChr6g0278121	8.98568	7.36487	9.30651	1.93724	2.11823	1.88427	74.4871	69.1716	84.3787	90.7311	200.498	174.549	62.0755	54.1304	22.2241	18.6835	34.4117	30.3206	41.5264	34.0571	29.288	29.873	85.9184	82.2427	52.8723	61.3791
RchiOBHmChr4g0391931	6.65592	9.93422	7.68406	1.78347	1.79317	2.12682	0.893457	0.773759	0.618133	0.388105	1.74342	1.19454	34.6139	30.7316	0.0434769	0	0.293213	0.681822	0.135128	0	0.410575	0.197148	0.205216	0.0817841	31.0228	33.7484
RchiOBHmChr7g0177421	4.41478	3.80672	2.54089	0.881652	0.80404	0.838984	58.9472	59.8506	90.7512	93.5911	41.1863	38.2621	7.25883	4.74581	3.44941	2.12068	93.4027	105.124	0.56426	0	2.00019	2.96365	68.4684	72.4852	51.0062	53.7288
RchiOBHmChr7g0181991	20.804	31.4299	25.5034	7.24602	5.55887	5.40928	0.109812	0.815142	380.484	350.6	1060.12	973.642	1.59653	2.38397	0.106872	0	0.20593	0	0	0	900.472	891.885	66.6879	67.146	0.251262	0
RchiOBHmChr2g0100881	3.24855	6.1414	3.23805	1.07666	1.06273	0.808859	0.0748045	0	0	0	0.0540622	0	22.519	21.2133	0	0	0	0	0	0	0	0	0	0	0	0
RchiOBHmChr4g0421181	6.55137	11.3105	12.1731	2.18738	2.22005	2.74761	0	0	0	0	0.188061	0.452557	33.9747	35.1308	0	0.268929	0	0	0	0.082011	10.0091	8.57448	1.11567	2.06433	84.3487	80.4532
RchiOBHmChr5g0027261	2.31251	3.59707	1.74002	0.653674	0.618108	0.533176	0.606089	0.516841	0.19383	0.327237	0.393483	0.361785	2.50385	2.13957	0.569868	0.679469	0.500875	0.578908	0.0207155	0.233108	11.3296	13.8634	3.0013	2.35082	7.19258	8.26207
RchiOBHmChr5g0077971	2.19384	6.0148	3.26617	0.815284	1.23669	0.669152	0	0	0.110397	0.127077	9.51409	6.5251	28.0712	25.8406	0	0.362807	20.4082	12.5706	10.2648	11.2852	2492.76	2402.1	25.1572	28.4387	24.0974	40.7017
RchiOBHmChr5g0063321	53.2566	83.2233	66.6224	15.3832	23.3731	9.73143	181.38	173.315	168.143	167.836	257.151	247.92	257.231	265.973	4.94089	4.29284	28.0856	31.5629	93.8144	88.9766	26.0397	25.8468	2.01413	3.08401	1.10883	1.26736
RchiOBHmChr3g0472721	2.36057	4.93689	3.1838	0.854326	0.942484	0.700547	0	0.0197912	0.166011	0.121605	0.0693672	0.211268	3.18082	2.80001	0.151795	0.706771	6.38982	6.08508	0.157262	0.192845	5.72166	6.8832	0.253527	0.42831	5.90222	5.35918
RchiOBHmChr5g0008671	2.67981	10.1817	4.05614	1.55951	0.645163	1.87823	0.032167	0.132655	0.687868	0.558917	12.6002	13.0069	15.9008	17.5893	0.907871	1.49599	1.9605	5.09834	4.80015	3.22387	2775.88	3049.06	30.2627	53.4715	1.50884	2.82659
RchiOBHmChr1g0351471	1.96248	5.23533	2.31242	0.777334	1.12835	0.350391	21.5622	18.854	3.18645	2.31811	0.820172	0.898737	10.3294	11.5212	1.93283	2.97403	0.152014	0.0475845	0	0	13.4515	16.0622	5.54836	4.34073	0.0463692	0
RchiOBHmChr5g0038171	15.397	11.0399	15.141	3.23653	2.86991	3.90994	125.134	133.654	119.016	127.419	332.134	337.175	4.13617	4.86511	23.1016	17.1207	46.912	45.229	26.7923	25.4919	9.36678	9.42062	83.863	72.4611	4.26111	4.54562
RchiOBHmChr3g0478781	1.96713	5.21427	2.5104	0.743688	1.19497	0.369233	365.316	323.657	0.423029	0.626071	1.94437	2.13063	35.417	43.3492	0	0	0.0900944	0	0	0	13.0501	7.37826	5.29669	5.18924	0	0.117267
RchiOBHmChr2g0158821	36.3362	40.7905	35.8824	8.09417	10.2417	9.0067	0.546199	0.577202	1.52442	2.5209	7.3768	6.86844	28.7572	29.0423	0.332236	0.617411	3.84109	4.22832	3.11502	3.17928	16.158	13.8451	1.78773	2.87484	0.644412	0.937416
RchiOBHmChr3g0463161	90.1361	74.4328	88.7278	21.188	18.6432	21.5351	36.8445	35.9394	90.5769	92.2039	122.744	112.247	68.5599	63.575	63.1201	69.0278	43.7757	41.3806	88.5484	65.6166	349.537	331.289	76.4349	95.7116	110.481	104.82
RchiOBHmChr6g0249631	3.25512	5.38318	3.67065	0.984965	0.996987	1.0146	16.8593	15.9139	23.7993	23.2587	19.292	20.0972	81.2239	69.5164	523.323	327.666	100.294	64.9888	0.377754	1.59405	7.17357	7.68827	213.239	193.935	45.8627	56.4694
RchiOBHmChr6g0284001	11.5596	9.76676	10.671	2.87431	2.59438	2.30783	16.9021	17.0346	12.1627	12.6425	5.61687	6.06704	0.663751	0.599668	1.00712	2.20579	13.8268	14.5285	15.8574	13.3208	0.462327	0.218827	15.3109	12.8075	0.628945	0.60516
RchiOBHmChr2g0088121	10.0764	16.6374	10.9393	3.16119	3.84325	2.11802	0.55304	0.596492	0.989989	0.862374	1.35279	1.80343	5.27545	5.71454	1.65611	0.527594	0.718004	0.849075	1.28681	0.844682	1.91149	0.788516	1.71974	1.09035	9.14996	7.9437
RchiOBHmChr2g0092311	8.24932	19.0517	8.63756	2.78457	4.41924	1.58059	6.68752	11.0316	6.48443	4.74075	19.1313	22.5345	213.76	214.09	0	0	0	0	0	0	0	0	0	0	0	0
RchiOBHmChr2g0130461	10.5164	8.77435	8.239	1.39631	2.40686	3.11421	0	0	0	0.0831893	18.2697	18.735	0.884431	2.10479	0	0	0	0	0	0	0.117341	0.101419	0	0	0	0
RchiOBHmChr1g0348531	16.0342	27.8757	31.29	3.84042	9.92721	4.78318	57.6613	46.7004	20.7502	34.8596	55.2054	24.9091	59.0996	48.0922	29.7945	13.6694	23.8282	23.3799	26.8218	34.4255	140.986	154.648	23.894	18.3646	14.9618	6.71079
RchiOBHmChr6g0260891	3.52463	3.58871	2.69187	1.21562	0.233228	0.980758	0	0	0	0.0252562	0.151273	0	0.119339	0.0473343	0	0	0	0	0	0	0	0	0	0	0	0
RchiOBHmChr5g0027011	5.51795	9.40793	6.06491	1.77753	2.35315	1.08257	6.38248	3.90944	3.30586	2.75208	1.52626	3.12193	35.52	32.3798	3.33418	1.74606	0.924084	1.59784	15.1893	16.8615	5.75094	4.63924	6.46754	6.61556	111.73	107.621
RchiOBHmChr6g0254281	24.6204	18.3002	20.6575	5.40027	5.67384	4.83304	8.26039	8.49302	9.67904	11.1415	36.4736	36.2353	1.8387	1.15152	7.54369	3.56684	6.57826	4.84903	7.41606	3.31666	5.31548	3.89512	8.73282	8.85604	6.01976	2.96917
RchiOBHmChr6g0249071	2.24669	1.72534	2.25417	0.528531	0.485892	0.553248	1089.53	1067.06	585.786	611.387	74.2025	79.2714	18.5078	17.1103	0	0	0	0.382065	0.164061	0.153846	38.2171	29.8721	15.5473	18.7668	0.186154	0
RchiOBHmChr7g0196251	18.4512	43.1614	32.4167	7.52615	9.13723	6.90999	0	0.020589	0.282606	0.650609	3.31953	3.01187	23.5476	24.5902	1.14184	7.40423	25.4427	21.7754	66.3216	70.3348	410.009	434.51	67.8633	76.2736	374.921	343.41
RchiOBHmChr7g0242321	2.31246	3.75913	2.45531	0.644526	0.711034	0.797333	0.482137	0.538012	1.76593	0.780243	0	0.0739867	2.81358	2.50131	1.24208	6.24319	25.7418	22.1425	7.37774	7.96415	1.4481	0.951226	10.6572	12.2275	205.744	179.157
RchiOBHmChr2g0169841	1.56622	1.39608	1.4286	0.503138	0.317175	0.269318	1.0793	1.40377	3.42024	4.20749	2.64009	3.3571	1.77508	1.52078	7.31246	6.43527	65.7028	56.3881	0.209277	0.0392492	68.5043	49.3899	241.457	278.642	186.12	183.855
RchiOBHmChr3g0471771	592.332	369.852	466.197	122.573	98.8152	139.66	0	0.0841464	0	0	110.562	102.301	0.523507	0.24225	0	0	0	0	0	0	30.057	13.5071	0	0.280162	0	0
RchiOBHmChr3g0456581	1.42904	4.46579	1.97251	0.519117	0.774809	0.697403	0	0.0498716	0.0126767	0	0.029133	0.0657251	25.8214	28.9476	0	0	0	0	0	0	0.0205824	0.213476	0.0370353	0.202944	0.392	0.172189
RchiOBHmChr4g0402921	139.171	214.386	154.056	50.9727	36.9279	40.4388	0	0.0444106	0.0677313	0.389824	1.67332	1.86119	35.2277	34.5937	1.25768	4.28489	551.578	365.958	76.5499	71.7325	281.417	280.825	176.756	178.027	132.998	127.355
RchiOBHmChr4g0392711	3.98232	3.69421	2.25145	1.14935	0.926578	0.378597	1.69231	2.09369	21.104	19.9833	21.0027	19.2386	2.17095	2.63272	0.227173	1.29666	0.629246	0.41107	0.147097	0.2207	3.57552	4.94459	41.1219	47.4606	986.542	1095.22
RchiOBHmChr2g0096741	15.1928	18.6328	15.886	4.34508	5.33816	2.81918	0	0	0.0204976	0.0235946	1.3661	0.701414	28.513	28.2567	0	0.0673633	0.336142	0.114787	0.985805	1.01687	12.0477	9.80891	0.628789	1.16345	1.71512	1.71031
RchiOBHmChr1g0332441	3.94636	4.18424	4.66154	0.885438	0.930292	1.50462	0.11132	0.344307	0.24505	0.322371	1.50848	1.12532	5.42657	5.02223	0	0	0	0	0	0	0	0	0	0	0	0
RchiOBHmChr5g0081281	16.2464	10.6332	16.1852	3.77162	2.55323	4.77186	1.0184	0.699974	1.6369	0.901147	8.01438	6.53121	1.16128	0.460609	0.0550634	0.350836	0.318303	0.0664251	0	0	28.8307	25.3183	5.14613	6.73266	0.258915	0
RchiOBHmChr5g0006761	370.087	440.248	388.155	100.73	108.526	96.4603	14.0935	13.2956	15.3529	15.6719	778.232	750.89	2041.94	2050.52	0.537892	0.666396	1.8138	1.18961	5.29402	2.61283	2183.85	1956.56	851.889	680.452	11.0654	10.0055
RchiOBHmChr6g0254301	110.963	129.941	129.629	31.8306	30.1524	32.8846	787.267	755.901	524.831	514.845	430.242	397.783	78.0641	88.819	10.4976	19.4153	67.7626	74.9264	29.6362	24.3913	106.661	89.4912	545.542	452.574	2.62229	4.2235
RchiOBHmChr2g0086191	11.2613	14.1377	10.0036	3.05497	3.37021	2.6132	15.0858	15.5639	21.3892	21.1305	60.0211	55.0768	96.5634	101.291	5.65079	5.08985	8.94407	8.15576	9.51325	11.0286	217.847	220.364	34.9598	35.97	17.0811	16.6399
RchiOBHmChr2g0086811	28.1482	40.5139	30.9562	9.18105	7.86763	8.4247	0	0.178505	0.476421	0.156687	10.0104	14.7501	37.8512	40.3778	75.3006	74.7066	0	0	0	0.511574	66.0822	77.8418	147.639	192.561	0.619007	1.98101
RchiOBHmChr7g0199231	1.59612	3.12736	1.73239	0.818559	0.535127	0.259648	0.0200105	0.181549	0.188784	0.0869231	0.0144619	0.0391519	3.28578	2.83732	0.0973743	0.248168	3.1897	2.7722	12.6909	13.1494	0.388257	0.141295	3.93432	6.33768	2.3809	2.88177
RchiOBHmChr2g0150981	4.06582	3.83475	2.55371	0.881038	0.647968	1.18773	25.8455	23.3156	33.3238	32.0435	19.6128	15.9079	4.28258	2.52055	1.41489	3.50582	29.2324	40.3951	0	0	1.81453	0.85545	37.8445	48.0556	26.7967	21.6859
RchiOBHmChr5g0036301	7.51746	14.1764	7.86389	1.9941	2.72365	2.89158	0.417448	0.172153	0.0262554	0	0.211187	0.0544509	84.7545	86.3219	155.765	149.835	23.133	20.5353	0.462996	0.157879	5.20079	5.15833	11.1607	14.7116	72.9274	83.5027
RchiOBHmChr3g0481001	3.19804	6.81406	2.8624	1.08435	1.42055	0.806154	9.11935	9.48795	6.50411	5.56656	4.24301	5.05345	3.61918	4.20542	1.74024	1.75559	11.8481	11.0564	0	0	0.0608666	0.026304	10.9522	10.0935	2.96627	5.7467
RchiOBHmChr6g0254291	21.2444	13.765	16.9395	4.63497	4.3338	4.51824	42.9912	50.596	43.8532	47.4454	158.198	151.669	11.3956	11.0866	38.9042	34.4708	35.9104	35.5184	29.8276	23.137	22.2506	17.8262	43.9639	42.8815	27.8041	26.6945
RchiOBHmChr7g0192371	5.68702	9.653	4.08846	1.31649	2.0668	1.66234	0	0	0	0	1.20588	2.82933	13.5848	10.9123	0.0649551	0.0689768	0.250322	0	0.60565	0.252417	10.6323	14.6092	10.2403	15.6399	77.5019	53.5972
RchiOBHmChr4g0389611	46.2237	89.6452	59.8633	16.6983	15.9294	18.24	2.06243	2.71447	1.21436	1.08015	0.507418	0.25757	931.754	940.176	235.271	381.718	28.7607	34.0023	12.6983	16.7619	18.0141	21.1471	3.42686	1.72721	11.4965	11.9963
RchiOBHmChr3g0488651	6.34035	5.56226	4.23026	1.40365	1.31959	1.48091	102.251	106.119	169.921	184.104	101.917	86.9143	13.8839	12.8219	8.37144	10.6427	132.114	118.056	0	0	13.7327	5.66736	107.412	115.112	62.7875	83.0963
RchiOBHmChr5g0000691	2.56013	8.8415	3.53889	0.949611	1.86746	1.06081	0.0545031	0	0.0856991	0.0197295	0.590851	0.995293	9.76526	13.2375	259.332	175.35	19.7009	56.0863	155.851	162.792	132.689	147.637	12.3935	14.119	5.67428	4.72278
RchiOBHmChr5g0007621	4.30452	1.86741	4.03899	1.01454	0.741658	0.907281	3.1223	3.08762	20.7946	19.9412	17.0959	17.5955	0.062099	0.125891	79.7053	27.2157	12.4216	8.86591	10.3312	7.97914	4.17713	3.80262	10.9704	12.5917	44.9142	47.1549
RchiOBHmChr2g0124881	6.34664	7.46419	7.31837	1.69157	1.86613	1.99826	0.0385004	0	0.0242148	0	0.52867	0.652847	1.84388	1.22763	0	0	0.0361	0	0.0388193	0	0	0	0	0	0	0
RchiOBHmChr2g0150941	2.987	2.5941	3.05935	0.574652	0.778854	0.937443	3.92109	3.82371	1.41703	1.59976	4.68129	4.69071	0.889301	0.925918	13.3881	5.73158	3.08755	3.45901	1.70375	2.31456	5.61913	3.09758	6.28946	6.18698	6.04738	6.90062
RchiOBHmChr6g0265771	31.7875	57.0422	35.8759	13.0382	11.3368	8.32484	16.615	15.3026	6.61832	6.31515	17.3113	15.7123	783.653	787.916	0.94326	2.14642	26.3546	21.4574	5.02577	9.16384	2866.16	2884.21	39.3074	30.4176	2.37606	3.21063
RchiOBHmChr7g0192941	10.2535	8.99754	9.85087	2.88714	2.60468	2.12467	9.74734	9.99694	11.0084	11.9046	53.079	52.7362	26.9294	30.9079	18.7666	13.8843	3.41742	3.28387	5.81138	5.00875	44.0135	39.6874	16.8595	19.0086	0.339395	0.568944
RchiOBHmChr5g0011151	1.34468	0.940045	1.11396	0.341015	0.167202	0.396625	29.5445	29.6761	20.3542	22.2828	13.5801	15.1256	0.242404	0.644749	1.44417	1.48189	3.84583	5.52009	0.353032	0.173407	10.7095	10.1835	23.4982	18.589	10.6438	8.68879
RchiOBHmChr5g0035251	1.31241	1.33398	1.11976	0.320504	0.30938	0.371711	5.65888	5.97599	8.84797	9.35203	2.78064	2.75936	0.237457	0.313948	0.437503	0.532913	2.41748	2.93381	0.0133312	0	0.0270037	0	0.911056	1.41601	2.26896	2.33977
RchiOBHmChr2g0136391	12.1368	23.4757	13.7585	4.0559	4.86163	4.11939	2.83152	3.48187	3.78842	5.0317	5.28336	4.06269	150.27	154.656	0	0	0	0	0	0	0	0	0	0	0	0
RchiOBHmChr0c22g0500691	0.457326	3.16456	3.49615	0.859964	0.632469	0.371975	5.16013	4.99372	3.07237	2.98865	2.83426	2.28845	11.2386	14.0498	3.54887	1.56433	1.54829	4.03881	5.41098	2.01661	9.20401	4.43303	8.72319	2.20426	2.3614	2.51906
RchiOBHmChr6g0284011	2.2415	3.19984	3.32089	0.668334	0.786452	0.890385	9.95639	14.0257	10.1966	10.7804	10.1885	12.1824	9.41917	9.2055	0	0	0	0	0	0	0	0	0	0	0	0
RchiOBHmChr7g0189041	39.989	32.1449	32.35	9.86745	6.50896	11.7616	0	0	0	0	15.965	16.6841	0.918766	0.865491	0	0	0	0	0	0	0	0	0	0	0	0
RchiOBHmChr2g0089611	1.53841	1.5965	1.60479	0.438313	0.458092	0.362219	2.3449	2.7378	1.20667	1.45513	0.220089	0.297918	0.963638	1.34292	13.2185	6.20018	4.22607	3.78986	3.43901	2.24589	0.901857	0.72573	2.71395	2.75971	0.139361	0.0371665
RchiOBHmChr2g0111261	1.33303	2.30183	1.20173	0.429957	0.569189	0.276176	12.5276	5.77411	13.5569	11.3371	30.8896	29.9178	15.4406	14.7484	0	3.42718	26.2569	27.4692	17.6467	22.9929	1938.71	1981.52	32.1595	37.1002	1.26462	1.79874
RchiOBHmChr7g0230451	2.86166	1.57236	1.77632	0.545638	0.581186	0.537137	12.8587	9.62295	7.65032	5.46344	11.0513	12.6604	2.46266	2.59353	18.9892	14.3155	30.8641	33.341	22.4263	30.9346	1.72379	0.832588	34.8032	26.9039	3.97598	5.27152
RchiOBHmChr4g0444641	4.72944	9.23077	7.44582	2.42944	1.82337	1.44965	1.44581	1.82125	1.93442	1.61768	3.36269	3.77175	10.3191	9.13106	0.767511	3.80348	14.5672	10.9562	0.0265051	0.0248548	145.175	144.943	1.06267	1.01063	0	0
RchiOBHmChr7g0229211	5.29555	4.92522	2.81134	1.01552	1.60044	0.869732	28.1278	28.0919	36.5854	40.1736	22.1952	16.4727	2.12736	2.85591	3.35202	1.97753	95.0902	105.248	0	0	1.954	1.60443	58.8925	56.9242	49.1454	51.1424
RchiOBHmChr6g0256461	1.79604	1.57933	1.64695	0.465195	0.538858	0.332011	0.153524	0.0379876	0.241398	0.0778037	0.854346	1.0313	0.170687	0.135402	0	0	0	0	0	0	0	0	0	0	0	0
RchiOBHmChr7g0188071	1.7401	3.12629	2.47848	0.652972	0.700342	0.621371	105.275	103.436	55.3579	52.0604	11.2254	12.4749	5.65782	7.1226	0	0	0	0	0	0	0	0	0	0	0	0
RchiOBHmChr4g0432561	8.07253	7.76091	5.84948	1.93681	1.85623	2.07346	272.362	284.499	363.195	363.708	81.764	83.0401	8.40936	8.26287	72.4798	99.7169	1099.84	742.706	0.957639	0.158472	2.9097	1.52866	284.52	279.893	140.682	182.941
RchiOBHmChr1g0363241	4.00151	5.63943	5.06512	1.23397	1.12455	1.6465	11.6324	9.66723	13.0467	12.4563	11.3157	11.1346	56.0206	57.9427	12.0958	9.46214	3.98132	2.95987	4.45959	5.18557	11.2917	10.5013	13.6537	14.0083	12.5997	12.8472
RchiOBHmChr2g0140091	39.682	24.692	31.1811	8.93711	7.91936	9.0433	85.351	83.9828	109.263	108.896	162.346	166.621	5.76555	6.19172	1.1451	2.07048	21.8561	26.7688	8.84946	8.62918	22.5693	18.3843	35.2347	35.6872	5.96649	8.57704
RchiOBHmChr7g0224561	0.923016	1.11783	1.00089	0.251788	0.203698	0.383364	7.69596	7.44194	1.89164	1.66511	0.575376	0.86538	1.05913	0.540119	12.9998	23.4954	24.9662	21.6019	4.3704	2.67642	50.8579	59.8849	6.50176	6.2349	0.101203	0
RchiOBHmChr7g0233721	0.422107	1.63863	1.05226	0.235298	0.276884	0.335866	4.64411	3.70273	18.207	18.044	8.95029	10.399	55.6045	73.5161	104.407	23.9982	262.145	562.505	131.893	125.729	185.433	243.346	64.855	71.7014	3.36499	6.80147
RchiOBHmChr3g0471781	18.7187	13.396	15.426	4.48523	3.4341	5.06447	35.1626	37.1003	23.6177	24.4963	57.4417	53.6536	2.61001	3.15069	28.6684	17.6901	25.3809	26.6388	19.9344	18.5677	20.0541	10.6575	37.6696	28.4214	23.985	23.3193
RchiOBHmChr6g0260861	11.6097	14.7677	9.83051	3.25581	3.47147	3.1353	2.7659	2.68836	8.0255	8.00981	2.23675	2.34706	9.90153	9.87759	4.97344	8.39493	0.96411	1.59347	2.6022	3.7915	34.3037	37.5901	4.82729	4.89422	22.2446	24.6208
RchiOBHmChr2g0136681	1.5654	7.16921	2.0633	1.15345	0.916185	0.856153	0.0913596	0.30141	3.84986	3.83625	52.8874	57.4386	2.18772	1.79744	0	0.188838	0.685308	0	0	0	10403.9	10970.2	10.66	26.51	0.627125	0.891996
RchiOBHmChr4g0434191	14.4065	9.99072	11.1382	3.28765	2.94548	3.49828	26.2874	26.4949	48.7407	47.3123	164.107	153.613	6.65455	8.88138	1.17685	1.57573	0.591563	1.79003	0.530103	0	25.6096	20.4642	5.21674	6.01567	0.0601488	0
RchiOBHmChr3g0468871	3.22311	4.57429	3.71796	0.680224	1.23819	1.26224	0	0	0	0	0.0648964	0	0.307181	0.411208	0	0	0.084197	0	0	0	0.481416	0.396281	0.0618747	0.246588	0	0.0273977
RchiOBHmChr7g0181211	3.67807	3.67497	4.57475	1.10781	0.891818	1.28213	11.8363	12.0404	5.95556	7.99795	13.6868	15.3103	9.78527	8.69926	4.99177	1.63103	2.21967	2.54767	2.18796	2.42477	12.2886	4.70119	5.61856	5.59787	1.12846	2.4076
RchiOBHmChr1g0375671	1.27584	1.55146	1.294	0.406905	0.305248	0.41819	3.38242	4.75591	2.99858	2.75198	1.32702	1.17652	1.32239	1.09273	2.91566	1.76449	3.11112	2.0801	2.11122	1.85793	1.11847	0.369624	3.90669	4.3641	1.95327	1.80848
RchiOBHmChr5g0083851	4.7478	4.14851	3.74766	1.3616	1.14867	0.914618	7.11364	6.97099	7.24275	8.43905	6.59183	6.04044	1.8974	2.07856	2.53622	3.56674	16.5432	15.0083	1.06523	1.09879	0.611359	0.466241	11.6153	11.6693	2.05475	2.40684
RchiOBHmChr2g0096501	1.8481	1.77212	1.13314	0.511714	0.34362	0.444606	8.32636	8.32093	10.7231	10.3658	6.04941	4.05121	1.20565	1.04608	0	0.591892	8.88124	10.3962	0.0444197	0.0416538	3.37413	1.7109	11.0903	12.2189	7.96341	6.82836
RchiOBHmChr6g0311741	10.6923	7.80829	8.36274	2.59504	2.40643	2.36208	1.71475	3.99695	6.61162	6.69298	58.2996	55.2848	0.828887	0.708115	0	0	0.419436	0	0.0751718	0.352455	17.7393	18.0961	0	0.409468	0.511768	0.818906
RchiOBHmChr2g0167701	1436.7	1246.7	1340.37	384.86	326.33	395.426	1231.6	1223.88	3113.26	3074.59	6263.36	6016.38	130.711	132.074	198.118	434.687	31.1996	71.4535	142.24	110.143	306.414	155.383	920.483	914.76	0.598313	0.0797827
RchiOBHmChr2g0111001	3.3434	2.67142	2.29939	0.681958	0.680678	0.950254	4.1154	2.82861	6.74057	6.26927	261.672	285.568	2.71301	3.25733	0	0	0	0	0	0	0	0	0	0	0	0
RchiOBHmChr6g0291361	3.77651	3.62272	2.94936	0.853665	1.11833	0.875817	69.7277	71.4526	134.689	140.659	95.4415	89.1596	10.3002	9.60438	7.50585	7.86139	1.2878	2.60474	3.30221	1.9978	140.684	142.203	42.2229	41.0037	371.668	353.548
RchiOBHmChr1g0347501	4.40893	3.30125	2.6073	0.715533	1.31561	0.817085	21.662	24.4108	38.3382	32.7333	12.3787	11.1707	1.61563	2.64872	3.30941	6.7683	56.3289	61.954	0.25397	0.714469	1.80055	0.22232	44.4324	51.5316	24.6386	24.9003
RchiOBHmChr2g0165561	6.07173	7.34995	6.19885	1.75652	1.8497	1.82347	0.395244	0.45639	0.298306	0	4.74175	3.76348	0.202813	1.44798	0.692393	1.55222	1.92713	2.50578	18.81	15.9197	745.242	762.595	0.871512	3.03906	0.542619	0.0964748
RchiOBHmChr6g0249291	19.8873	13.1423	15.0034	5.59158	3.08429	4.62925	0.147627	0.121761	0.0928502	1.28255	29.127	26.2846	0	0.100154	0	0	0	0	0	0	15.0756	22.2814	0	0	0	0
RchiOBHmChr2g0162061	15.3974	24.4431	14.9302	4.65733	5.73458	4.80364	46.783	44.4696	26.3209	31.3306	11.5996	11.8246	42.6026	39.7239	28.7531	17.2633	8.80667	6.97906	12.4669	12.8147	17.3614	18.0489	34.5165	30.1996	21.9667	22.2
RchiOBHmChr6g0301201	1.55893	6.55807	1.97355	0.819985	0.961137	1.02415	0.0675508	0	0	0.0489052	28.7549	27.1824	1.09765	1.28319	0	0	0.0633391	0	0	0	6066.78	6386.8	6.5786	16.6333	0.38641	0.329768
RchiOBHmChr2g0115361	2.91489	2.47867	1.81767	0.632752	0.654418	0.733845	108.542	104.817	67.8088	74.6604	40.0505	50.4767	4.4543	6.00693	13.5847	28.3134	22.074	25.9269	8.50741	6.50033	4.36135	0.551646	102.594	97.4488	10.1297	8.00921
RchiOBHmChr6g0301491	16.3634	47.8723	22.2412	7.77023	10.2623	6.21736	13.0361	14.8378	27.3848	27.181	12.2478	11.9878	503.59	473.422	14.3365	17.245	154.992	161.773	0	0	20.7673	20.826	39.5239	32.4573	6.11478	6.20485
RchiOBHmChr1g0345321	7.08544	5.21263	6.03948	1.70716	1.40354	2.05692	41.5827	37.373	37.3967	39.0123	68.005	71.8532	19.431	18.9623	127.124	70.8869	30.3078	28.9899	31.4669	31.9395	74.5525	72.1178	39.1493	34.9242	128.791	127.972
RchiOBHmChr6g0286501	8.80894	21.652	10.5425	3.17711	5.61754	2.67132	0.114906	0.521252	0.325215	0.54073	0.498264	0.599521	140.182	156.924	0	0.0593769	0.0538709	0.0674523	0	0.0543218	8.27253	7.80929	1.47798	1.36735	0	0
RchiOBHmChr6g0300501	2.5221	7.2898	4.25718	1.38188	1.55497	0.986252	3.94028	3.46054	0.206519	0.528272	0.237307	0.356916	39.6577	40.7414	4.86451	5.91981	3.86566	7.71009	1.94967	3.03562	59.9468	66.8189	10.6257	9.75172	1.54438	1.20222
RchiOBHmChr6g0257581	5.01589	5.36965	3.42369	1.09369	1.54438	1.24891	7.04558	6.95428	3.99544	5.05903	3.46418	2.71182	4.7414	4.54483	6.96938	9.78827	14.1873	10.5093	8.09382	6.00635	5.18975	4.38363	8.43629	7.50655	5.41775	5.3566
RchiOBHmChr5g0049611	3.79406	2.36521	2.03237	0.613526	0.837987	0.875751	7.05777	8.81127	12.1769	13.6537	7.41419	6.81644	1.05547	0.968102	0	0	0	0	0	0	0	0	0	0	0	0
RchiOBHmChr7g0212221	3.15762	2.0637	1.90287	0.8267	0.456004	0.728847	0.86851	1.31328	0.728331	0.419188	2.71996	4.24823	0.618974	0.196407	0	0	0.81436	0	0	0	0.147819	0.511048	0.398972	0.265002	13.7452	13.073
RchiOBHmChr6g0303061	5.39775	6.06371	4.9071	1.41727	1.59678	1.63563	0.0199033	0.0328321	0.287918	0.230553	0.12946	0.220672	0.885133	0.945208	0.154964	0.329118	5.33745	5.42124	4.79629	5.17512	6.19916	3.68913	0.548586	0.255064	4.21256	3.95943
RchiOBHmChr2g0142111	197.22	323.077	204.762	60.1231	85.4715	59.9267	1.03683	0.694819	0.366812	1.50128	322.913	286.161	1468.29	1387.3	0	0	0	0.0760799	0	0.0612699	228.303	239.994	36.3172	36.1835	0.148274	0.316348
RchiOBHmChr3g0460991	1.77627	4.20768	1.42412	0.743629	0.649455	0.70764	1.94286	2.19282	1.73647	1.80635	0.0147803	0.0266759	13.1527	11.9599	4.69726	8.94053	2.07101	0.792348	0.144344	0.154692	0.313268	0.180508	4.24642	4.64264	16.7291	15.6496
RchiOBHmChr5g0050441	0.807592	1.80268	0.627425	0.404065	0.22288	0.288383	1.86505	3.80905	3.18391	3.08629	9.75618	13.4958	7.82324	6.5675	0.172868	1.19322	0.0832745	0.104269	1.88049	0.0839715	1414.64	1480.04	2.77426	4.22736	0	0.10839
RchiOBHmChr7g0191751	0.948702	0.698609	0.945	0.200633	0.249003	0.298317	76.3579	73.1754	31.2882	26.9937	13.9936	15.5745	0.849194	1.1452	0.869732	0.820962	2.2345	2.73955	5.90693	5.53912	32.1435	39.0878	29.0103	24.7225	1.47679	1.93895
RchiOBHmChr4g0404641	6.2505	9.60831	6.82166	2.1251	2.27865	2.0695	1.94611	2.20502	1.11273	0.896596	1.39227	0.871791	71.2982	67.9216	3.25234	2.49886	8.95796	8.00838	10.9805	11.096	32.3395	34.7008	9.6804	10.9943	420.936	412.911
RchiOBHmChr2g0101031	23.1079	16.1262	18.9138	5.77376	5.75473	5.09127	10.2636	8.90192	11.8193	11.4121	75.4517	70.6589	6.43864	8.0006	1.14485	1.15495	2.04056	2.72763	0.682	0.667341	14.2651	17.8324	6.72778	7.2414	2.18694	2.26118
RchiOBHmChr2g0105531	10.9228	12.0072	12.2264	3.3745	3.53658	3.13091	92.4179	93.6153	67.4731	64.8911	96.9988	96.7409	42.8155	42.0932	0	0	0	0	0	0	0	0	0	0	0	0
RchiOBHmChr2g0173421	7.64993	4.59535	6.85569	1.9796	1.45591	2.05505	9.94838	11.5482	10.1966	6.53551	78.5555	83.3855	3.93892	4.74947	6.27541	1.52319	12.783	17.0872	10.0308	10.2771	251.91	245.861	20.142	15.8519	0.843077	0
RchiOBHmChr2g0143591	2.59151	2.75623	2.16891	0.625428	0.316235	1.26472	3.81849	5.13559	2.79109	1.54414	2.73481	3.49998	7.03147	6.13801	5.32331	2.77312	2.03213	2.706	1.07526	1.82146	3.61837	1.97361	4.45641	3.49532	6.49384	6.59155
RchiOBHmChr5g0014411	223.478	265.587	219.058	67.3002	72.2817	63.854	267.176	283.037	279.589	267.761	1287.31	1239.37	2814.29	2824.86	0.791788	0.336325	132.124	128.947	80.3899	89.0766	5176.93	5151.35	1024.03	1003.58	1399.51	1439.93
RchiOBHmChr5g0009331	3.37627	6.50603	3.97693	1.24	1.2436	1.51253	35.0682	34.856	47.1748	50.195	28.7665	28.2901	26.0942	26.8219	39.651	48.3849	139.36	190.648	209.044	231.465	165.918	176.999	28.2787	27.5612	72.3695	53.1033
RchiOBHmChr6g0278971	3.55526	1.53194	1.52907	0.38466	0.827488	0.713786	8.80238	8.95727	62.193	58.4029	51.7189	42.7702	0.423653	0.361926	0.556282	0.630106	41.3036	37.7138	0.422632	0.0720576	0.350217	0.0336331	2.2056	1.39522	0.34876	0.744093
RchiOBHmChr4g0401601	1.61538	0.759112	1.21867	0.436017	0.240505	0.363051	4858.09	4592.49	3335.8	3184.79	148.871	143.744	11.754	9.8927	11.2553	39.1477	250.037	167.065	6.08383	4.43723	0.684635	0.88761	135.51	110.31	23.9691	34.979
RchiOBHmChr3g0482161	5.99113	10.1095	4.6952	2.43849	1.81583	1.74036	2.1326	1.6262	3.54306	3.00052	1.13413	0.866005	1.9615	1.93819	2.27132	10.1468	28.6741	30.5649	19.1495	17.6148	80.7428	73.3031	25.3974	24.9724	117.25	111.132
RchiOBHmChr4g0430851	33.4129	48.6463	43.814	12.6108	10.7277	13.3396	0.0476319	0.0392863	0.0898742	0.0517267	4.92266	5.11018	89.9245	92.2426	2.27148	1.23068	0.669933	0.531259	1.00855	1.7564	118.733	120.406	4.02609	4.94868	0	0.203463
RchiOBHmChr5g0067021	1.00457	1.86863	1.03107	0.415009	0.442046	0.265553	2.11583	2.15022	2.8516	2.05153	1.47452	1.70025	90.4105	88.3817	0	0	0	0	0	0	0	0	0	0	0	0
RchiOBHmChr2g0147241	2.75214	2.46827	3.28743	0.966147	0.509751	1.01932	0.13863	0.320154	0.0348766	0.0802921	0.661253	1.10304	0.308255	0.545493	0	0	0.155984	0.488274	0.223645	0.15729	0.113254	0.220247	0.254733	0.228416	0	0.0676763
RchiOBHmChr4g0439461	3.92895	5.73587	5.27883	1.48016	1.31685	1.59027	213.976	210.66	8.27757	7.33993	7.14507	6.32461	13.6251	11.8338	16.118	13.016	6.67208	5.39694	5.46036	5.41806	7.0736	7.22541	7.75252	7.78162	20.0999	20.2123
RchiOBHmChr3g0458281	11.0423	14.106	16.8098	3.63886	3.76345	5.03181	0	0	0	0	1.40562	1.56117	2.30308	3.85695	0	0	0	0	0	0	0	0	0	0	0	0
RchiOBHmChr7g0203041	43.7255	127.816	50.1366	19.2032	35.1643	10.8767	356.521	343.833	440.68	440.707	446.648	440.189	542.185	561.038	34.8554	20.3346	2.38385	1.38428	3.15784	1.77673	7.78871	8.06527	1.32023	0.94437	4.42616	6.92514
RchiOBHmChr4g0445461	2.51895	2.83892	2.91055	0.970978	0.721877	0.72312	1.50281	1.37723	0.315065	0.846225	3.25831	3.3215	4.28413	5.89073	0.812546	0.345142	6.88902	14.0169	15.6577	12.4724	51.5816	61.3105	11.6593	15.9726	7.35482	8.96674
RchiOBHmChr4g0445761	34.8864	29.1672	29.3854	8.69266	9.39315	9.50938	4087.81	4072.65	1426.32	1452.93	49.4532	47.0504	7.96361	4.94539	32.2679	59.88	512.714	560.423	230.359	189.113	28.3351	12.4943	207.268	216.665	144.787	143.606
RchiOBHmChr5g0039691	1038.06	1561.58	1134.32	362.623	404.716	333.851	41.9515	44.215	82.0952	87.538	799.393	771.831	3735.34	3728.06	274.612	221.445	101.639	98.8841	29.463	28.7458	858.235	776.015	300.151	290.146	30.4193	29.7626
RchiOBHmChr7g0243481	2.13078	3.296	4.28668	1.02246	0.881225	0.957775	0.210896	0.278312	0.955031	1.17567	0.335319	0.385123	0.414835	0.314771	0.0615752	0.501305	7.11891	3.7883	4.35918	4.20739	1.1199	0.85626	5.42531	5.23159	7.26247	6.94947
RchiOBHmChr7g0223661	12.5662	8.09161	10.0423	3.29377	2.70535	3.12292	21.3795	23.2606	11.5007	9.79235	65.3308	68.6822	7.66647	7.15801	22.0424	14.0197	16.9967	18.2548	13.4378	11.8885	8.50617	4.93634	26.5664	24.2538	0.317654	0.387272
RchiOBHmChr4g0393021	1.20667	1.12637	1.21133	0.375049	0.4965	0.160604	9.02816	9.46878	11.7771	11.5392	11.6801	8.57765	85.6945	93.8402	1.19322	2.53421	10.0329	18.4509	33.1526	36.5683	53.951	62.5676	4.30091	8.16205	7.77844	8.2978
RchiOBHmChr7g0182751	25.1704	24.5837	30.573	7.61295	8.46028	7.83047	55.6185	52.3747	18.9159	17.2087	35.5144	37.3339	19.9702	19.418	22.6539	13.7211	17.068	18.5948	17.7576	11.2022	42.0319	42.7858	16.8823	18.6465	9.21493	10.221
RchiOBHmChr7g0189541	2.07868	2.21911	2.51416	0.61799	0.749936	0.661592	19.3522	19.4635	10.0146	9.57682	4.72103	6.55026	12.8493	9.80523	9.37732	8.10136	12.3268	10.4494	9.3034	9.88218	21.3466	18.0898	18.9801	18.985	25.6899	21.1269
RchiOBHmChr2g0161961	1.30564	4.83179	1.97001	0.734199	1.00435	0.67072	10.3601	11.4252	6.516	7.28981	3.07068	2.12572	21.4039	21.3622	0.736383	1.3835	12.0063	11.9582	13.791	14.308	69.0056	72.5882	19.7319	18.9134	17.6457	12.715
RchiOBHmChr3g0497601	4.35768	3.38808	4.15899	0.878855	1.24656	1.49343	0.165738	0.0911325	0.173735	0.11999	0.798539	1.26107	0.118119	0.0749607	0	0	0	0	0	0	0	0	0	0	0	0
RchiOBHmChr5g0072121	3.26067	5.20604	5.0008	1.56769	1.28108	1.16031	0.204277	0.31591	0.7227	0.332757	0.572081	0.482948	22.4274	22.1046	0.124255	2.37508	0	0	0.0514922	0	51.8646	49.0644	0.680339	1.77639	11.2471	16.9219
RchiOBHmChr5g0033171	87.3389	114.526	82.6113	25.9571	27.3374	32.0753	74.7015	69.0109	1.63156	2.03723	51.3186	53.5368	214.033	217.006	119.13	87.1546	104.922	133.129	85.3392	82.2288	618.942	642.884	270.327	397.357	402.466	457.456
RchiOBHmChr7g0236431	3.79254	2.60857	3.93317	1.16849	0.665325	1.29129	9.23018	10.3421	7.996	7.81719	19.7606	18.6273	4.17034	4.48974	3.55933	1.79986	7.51162	3.68036	3.68753	4.28123	7.46948	7.22455	14.4004	7.3331	6.77426	8.07675
RchiOBHmChr1g0348951	0.637305	1.1262	0.761259	0.261016	0.250391	0.242984	0	0	0	0	0.0324809	0.0293113	2.29336	2.42908	0.10206	0.0928962	0.0421409	0.0703534	5.83056	6.65733	1.45335	0.991702	0.0412914	0.0685656	0.582732	0.676491
RchiOBHmChr1g0383321	57.212	63.9791	57.9334	17.1034	20.0376	16.5737	20.9562	22.7661	31.5609	31.4947	65.1546	59.8749	630.104	634.403	54.3767	177.667	49.3476	43.3453	173.43	172.042	272.13	308.35	39.4418	42.7314	133.336	156.793
RchiOBHmChr6g0298561	4.65039	7.04632	4.44717	1.52677	1.94567	1.35268	177.115	179.407	170.107	181.182	36.6263	34.4151	204.049	199.675	46.1019	42.6568	160.52	164.185	94.1198	78.3795	36.8138	44.8844	157.444	150.647	41.4425	33.5823
RchiOBHmChr1g0366521	1.15006	1.13687	1.20367	0.449372	0.325331	0.260584	19.8458	21.1981	10.6755	10.5847	9.18689	9.19677	7.32149	6.80109	2.05588	0.612821	2.50197	1.10951	2.82122	2.04987	31.1469	35.589	0.493712	0.576704	0.148397	0.339226
RchiOBHmChr7g0233811	4.59129	4.96898	5.02264	1.38739	1.48683	1.52772	11.6168	10.3583	16.8508	19.6241	27.1534	20.4766	44.3941	45.157	13.2411	7.89574	10.5	10.5669	7.28107	7.02561	6.09181	4.80337	12.596	9.19668	5.02878	3.19318
RchiOBHmChr1g0318501	2.81532	7.69053	2.19489	1.16111	1.59651	1.0809	1.39879	1.42839	3.63078	3.63282	2.19835	2.34584	67.6748	66.3378	5.14284	1.21616	7.41143	15.7967	1.49992	0.923686	44.3265	53.8133	5.44652	10.4668	10.1352	6.88277
RchiOBHmChr1g0382431	3.52897	10.008	4.29981	1.60707	1.69107	2.11748	0.228466	0.296114	1.37535	0.992425	1.79268	1.61774	46.1677	44.4843	4.38347	1.9564	16.0972	16.2853	9.9383	13.5781	121.786	135.135	45.8788	41.826	240.058	233.54
RchiOBHmChr4g0419021	9.44606	13.3677	7.40748	3.219	2.79436	3.16365	31.6264	29.3027	37.5045	44.4823	19.0306	16.9917	35.984	40.833	51.2544	41.6128	63.7508	77.533	3.23098	1.71249	3.27234	2.45942	56.1935	49.8651	32.9946	40.8088
RchiOBHmChr4g0427991	38.3119	20.7429	34.7171	10.6503	8.32364	9.52438	31.2017	32.2733	30.342	30.5606	100.238	96.709	6.22925	5.69998	6.09966	17.5413	2.92245	3.06262	9.76936	9.16106	5.0856	4.12644	15.6872	12.6524	0.426343	0.496156
RchiOBHmChr7g0232641	2.01477	5.34872	2.30538	0.936285	0.977566	1.02621	0.353137	0.0910197	0.138816	0.0159789	0	0.0287889	31.8243	31.3098	14.7784	12.249	3.74579	2.69489	0	0.0626045	1.89325	1.5	2.33194	2.586	3.56033	5.3065
RchiOBHmChr5g0081291	22.1798	17.8171	19.625	5.40651	5.86113	6.98231	4.85945	3.9444	9.0235	9.04662	48.4988	52.3684	40.9654	39.1427	6.15567	5.1019	8.02807	8.05973	4.82192	2.91721	213.542	225.211	42.9454	68.276	0.264738	1.03552
RchiOBHmChr6g0276741	12.0347	9.84922	11.4487	3.56758	2.98928	3.63742	1.23345	1.60924	0.176313	0.332841	4.82992	4.59992	0.469897	0.418402	9.47246	19.3646	14.0993	11.9536	6.91928	7.62286	0.389326	0.188044	0.782958	0.636378	0.269399	0.191591
RchiOBHmChr2g0104051	1.26582	3.15153	1.53011	0.599228	0.422345	0.807823	113.39	114.659	241.934	243.224	38.1198	37.548	30.1728	28.639	54.2375	108.57	1422.4	1106.83	23.5382	28.8769	153.075	163.755	64.8282	56.6363	26.2059	29.5623
RchiOBHmChr1g0382491	6.5055	11.3076	8.88901	3.00813	2.46377	2.66738	2.7075	2.38199	3.51929	3.83322	1.21753	1.58922	6.45771	7.04122	0	0	0	0	0	0	0	0	0	0	0	0
RchiOBHmChr6g0274591	6.91101	16.6003	9.89026	3.06361	4.29046	2.85425	0.121019	0.0399261	0.060892	0.17523	0.279879	0.615632	59.0148	59.0811	0.0706677	0	0.113474	0.170498	0.0244043	0.0228847	43.6003	39.5857	30.176	38.063	143.133	148.85
RchiOBHmChr1g0380071	18.4232	38.0574	19.5613	7.94256	8.83834	6.40802	0.27296	0.15009	0.057226	0.263489	0.789087	1.24615	8.87078	8.51844	0.088551	0.0940337	0	0.106822	0	0	575.793	539.587	0.501564	1.08272	0	0.111044
RchiOBHmChr6g0249641	54.3556	54.533	57.224	15.9016	16.6384	18.4014	31.658	32.8579	41.4917	40.053	103.59	109.975	343.747	347.095	26.3439	18.4564	25.2345	24.9252	21.6579	22.9956	232.36	249.028	43.8008	49.7268	51.8277	51.5921
RchiOBHmChr4g0435001	5.71552	18.063	7.49286	2.96605	3.90455	2.70392	2.91191	3.13444	11.5267	11.3626	2.86542	3.06862	21.2311	21.9874	8.03755	8.55221	4.0724	5.09909	9.55453	9.19292	52.6851	60.6524	15.6438	20.0287	152.68	145.486
RchiOBHmChr4g0439731	2.1902	2.19501	2.56279	0.993328	0.46362	0.654407	14.4241	11.7304	23.4096	23.4413	13.7049	10.065	1.38023	1.57392	2.94502	4.69105	18.9158	16.5792	0	0	38.9359	42.0216	13.1594	11.0797	3.69275	4.43173
RchiOBHmChr5g0049201	1.42483	3.10288	1.21766	0.594075	0.688146	0.466392	1.49004	0.80853	3.44036	3.98855	0.63762	1.21473	1.32462	1.31681	6.02957	6.07869	46.6019	42.4452	69.3664	67.8648	195.147	219.769	28.226	34.6187	103.067	99.0371
RchiOBHmChr2g0156411	3.03045	3.2661	3.60433	0.956053	1.11603	0.967968	0.0146753	0	0.04615	0	0.137878	0.239276	2.13361	1.81201	0.0285648	0	0	0	0	0	1.18391	0.893746	0.0674146	0.228366	1.20884	1.50447
RchiOBHmChr4g0445431	1.18487	3.24854	1.72301	0.704524	0.728648	0.439969	0.696617	0.383041	0.109534	0.714475	6.92249	6.81487	12.0145	11.5	0	0	0	0	0	0	0	0	0	0	0	0
RchiOBHmChr6g0261381	2.7724	1.89556	2.83759	0.768542	0.918501	0.609456	14.1012	16.227	13.3831	13.3878	13.9747	14.3181	17.909	15.2952	8.2178	4.71237	7.20482	4.85759	5.8745	8.62234	5.43235	3.05564	11.7142	6.9563	5.11994	5.97705
RchiOBHmChr7g0193381	1.42252	1.55929	1.15977	0.401673	0.455098	0.418392	19.9079	21.7869	8.91469	10.075	6.05309	6.63892	12.4525	11.4955	17.7447	10.5869	31.7153	57.4109	18.7086	17.6656	27.1722	25.3619	16.929	21.1718	3.61171	3.53834
RchiOBHmChr2g0109921	2.32809	1.91267	2.23159	0.746215	0.60979	0.631201	3.06466	3.5809	3.02895	3.19605	4.2188	5.16339	2.43375	3.26723	1.52682	3.2427	46.4563	35.4236	4.48791	3.967	12.7792	10.691	16.3911	16.3308	47.5835	41.2318
RchiOBHmChr2g0115841	5.78238	27.3758	20.6303	6.48359	4.01603	6.06867	25.972	26.7551	92.4221	95.9188	136.446	137.155	32.6882	30.96	1.58619	0.869368	0.147891	0.740702	49.5116	44.6392	2400.81	2702.25	69.2184	129.361	1.56387	5.26152
RchiOBHmChr6g0292011	1.1587	0.610276	0.981457	0.278197	0.2578	0.31768	46.1259	46.1013	24.6223	28.502	15.9778	17.9395	1.13067	1.44506	28.879	21.3683	13.464	12.5037	9.92366	8.50713	5.13787	5.83454	21.7964	22.7247	28.6962	26.7129
RchiOBHmChr2g0138251	83.504	97.4439	87.7923	24.4668	37.0098	21.5329	103.186	100.646	105.849	109.181	306.339	300.062	217.857	220.599	3.0373	3.5496	8.62397	11.8256	15.9832	19.0941	30.7737	33.1275	8.85973	10.1119	3.4193	3.56699
RchiOBHmChr6g0258391	3.62454	4.44368	3.41112	1.38472	0.957994	1.20604	4.27259	3.80488	5.82235	5.51406	4.83316	4.74517	3.28331	3.1717	0	0	0	0	0	0	0	0	0	0	0	0
RchiOBHmChr7g0192601	2.05111	3.31143	2.60243	0.915172	0.814985	0.723986	2.81925	3.46089	0.206182	0.806936	3.69595	3.07872	173.374	162.264	1.14856	0.0677596	0.737714	1.00067	1.45435	1.85972	14.8636	11.8052	6.26464	9.72245	0.150018	0.720156
RchiOBHmChr5g0014321	72.1847	112.269	93.9401	27.7422	30.2867	28.2586	0.519218	0.685192	0.631352	0.476142	2.05134	2.61872	118.768	125.096	1.24645	2.7188	1.59036	2.1945	1.91956	1.14548	19.4768	19.2476	2.9894	3.70714	0.0792021	0.675923
RchiOBHmChr1g0331581	4.3031	4.05626	3.61192	1.31713	1.15147	1.24156	11.572	10.0041	14.9482	14.3824	6.56267	6.54228	1.20554	1.17873	1.94617	2.06667	24.3138	20.9757	11.0729	10.7554	0.535626	0.0868031	11.5956	12.9333	8.40102	9.44204
RchiOBHmChr7g0201601	26.4502	21.9263	27.4103	8.4149	7.33473	7.77955	64.4428	63.018	77.7722	76.1825	130.642	126.956	12.9946	11.9585	5.96693	7.67942	58.769	55.9812	17.0001	20.4782	37.2597	36.1744	114.373	117.642	5.41321	7.6453
RchiOBHmChr4g0403391	4.97183	4.08871	5.46419	1.19287	0.986972	2.44765	0	0	0	0	0.995794	0.513497	0	0	0	0	0	0	0	0	0	0.0434335	0	0	0	0
RchiOBHmChr7g0243531	6.25621	8.59025	6.8612	1.89974	2.36745	2.51083	0.0464411	0.0957603	0.0730228	0.0504335	0.0671272	0.0757208	1.64828	2.28425	0.0677968	0.52796	1.08864	0.517977	0.280954	0.285416	1.18563	0.67634	1.15203	0.552639	1.03606	0.736826
RchiOBHmChr4g0432611	0.976784	0.881097	0.838225	0.33167	0.227107	0.277527	35.8675	33.1122	36.0809	37.6698	5.61196	4.4442	0.993878	0.752582	8.94533	17.0876	398.226	274.925	0.213046	0.599341	0	0	31.8856	30.8978	24.2944	50.0924
RchiOBHmChr2g0160131	5.37249	9.45204	7.5309	2.42045	2.64526	1.87278	0.716201	0.344583	0.0750757	0.0648141	0.129402	0.0389247	40.6554	40.3289	89.0163	81.9755	1.34309	1.26128	0.78231	0.846459	3.35215	3.39775	2.76912	1.63897	0	0
RchiOBHmChr2g0152071	116.375	285.275	135.366	64.183	65.8898	37.7263	0.499069	1.14341	0.906791	0.602191	1.84349	1.44661	2094.85	2030.51	0	0.573091	4.47155	5.07805	0.279557	0.0524299	377.137	414.406	29.3962	21.8771	5.0118	3.18079
RchiOBHmChr2g0101611	41.5263	35.158	33.091	12.2437	11.0153	11.1052	167.543	163.015	261.565	258.579	566.126	563.062	170.365	173.918	116.628	150.262	156.365	132.524	190.906	178.952	243.373	218.058	236.505	254.739	215.883	185.243
RchiOBHmChr3g0462851	22.2567	17.5523	15.0118	5.31319	5.76901	6.12469	219.644	211.658	501.395	486.339	198.824	197.941	19.14	20.7646	16.1852	20.9356	27.8692	23.5751	33.5362	37.8045	249.141	254.218	653.508	676.608	30.2596	33.3596
RchiOBHmChr2g0164041	11.6252	9.35877	8.09399	3.20356	3.23463	2.63516	52.4428	51.8579	81.7855	77.9004	40.896	40.5397	6.47701	5.71972	9.874	14.0297	176.728	172.631	0	0.135108	2.91848	1.13512	126.822	134.988	76.0188	67.1427
RchiOBHmChr6g0273281	3.0161	2.57549	3.07346	0.986203	0.992534	0.716205	1.142	1.29983	1.49397	1.58742	4.25873	4.52835	0.742261	0.666294	3.84553	2.62013	2.65557	2.11839	1.01328	1.18773	2.42568	2.43926	4.65848	4.95494	2.27333	3.73523
RchiOBHmChr2g0090921	2.27695	2.9575	1.56311	0.637546	0.75886	0.742398	41.5633	48.0408	61.0565	56.2252	24.1138	25.6063	20.1714	14.4403	37.7913	33.7399	349.669	466.021	6.09037	3.26351	424.294	446.186	75.5798	88.5978	54.4614	72.1395
RchiOBHmChr3g0454551	5.32566	6.77473	4.92502	1.61524	1.29594	2.5152	17.2519	20.3045	23.5299	24.5589	7.65834	6.57388	0.828887	1.57809	1.9494	6.21031	40.0468	35.047	0	0.244369	0.263932	0.22812	18.759	17.2113	9.68378	13.6424
RchiOBHmChr4g0443311	407.376	407.896	397.933	126.73	119.034	136.127	22.813	25.0988	34.2945	33.4095	387.203	391.961	460.014	473.039	33.557	46.2008	307.551	322.483	702.588	717.901	1419.97	1540.73	48.365	61.6191	58.1158	48.0507
RchiOBHmChr2g0173621	3.79343	5.28565	4.95341	1.99376	1.39968	0.977383	151.789	139.104	142.049	141.001	52.9952	55.0928	70.8644	63.1797	5.28102	3.18292	33.278	28.582	171.53	132.701	67.244	70.2876	100.516	103.368	0.335567	2.86378
RchiOBHmChr2g0099111	3.66717	3.76101	2.98167	1.04482	1.15264	1.08831	95.1115	81.0515	113.331	126.689	47.6603	52.0959	10.3265	6.93152	24.9492	23.8062	137.604	161.827	1.68573	0.17564	9.48505	8.68995	103.939	122.091	58.6571	73.0025
RchiOBHmChr3g0461021	1.26263	1.55426	1.16319	0.444383	0.420205	0.38512	4.79775	4.04353	3.03072	2.80607	1.34759	0.737851	1.7201	1.32187	2.8546	1.29915	2.73061	2.28754	2.04907	2.13938	0.74882	0.647216	4.81216	4.02733	2.58866	3.57972
RchiOBHmChr3g0469131	4.72167	4.21582	5.1189	1.95417	1.12478	1.33406	1.17325	2.58049	0.983886	1.13254	9.75111	8.03437	1.50508	1.06129	0	0	0	0	0	0	0	0	0	0	0	0
RchiOBHmChr2g0174421	174.742	140.991	150.009	50.2173	48.0857	49.607	12.9076	14.4419	19.7416	19.1843	217.518	225.111	70.323	65.323	43.11	58.9705	60.0424	61.7985	69.4229	60.035	141.725	111.102	64.1834	70.4965	60.467	64.9431
RchiOBHmChr2g0136241	0.592271	0.481602	0.745647	0.180798	0.17552	0.227104	0.0429605	0.00393704	0.00900667	0.020735	0.134542	0.0778286	0.747063	0.618534	0	0	0	0	0	0	0	0	0	0	0	0
RchiOBHmChr2g0111181	0.570878	0.955721	0.591712	0.243975	0.256334	0.165834	0.168645	0.177031	0.0964263	0.321886	1.03045	0.699922	6.8443	6.36552	2.80513	2.42425	0.560643	0.863983	0.618332	0.275419	50.1781	51.0152	2.14102	2.61029	1.63122	1.53431
RchiOBHmChr7g0236511	2.57893	2.8269	2.10258	0.708527	0.998763	0.674238	0.909337	0.428578	1.17654	0.827627	0.544528	0.711669	0.377733	0.56404	0.733281	0.187958	5.91977	3.87387	5.47501	4.96215	2.94501	3.25629	3.38955	3.49599	6.7176	6.02461
RchiOBHmChr4g0391501	4.33761	5.1437	3.67006	1.27446	1.6616	1.24034	1.29781	0.88152	0.19206	0.331618	0	0.149367	0	0	0	0	0.286327	0	0.153948	0.072181	0	0.202144	0.561111	0.349403	0.0873393	0
RchiOBHmChr1g0378071	31.4776	39.0918	38.6238	11.1534	11.6783	12.038	4.693	4.98729	2.49756	3.33229	5.67456	6.82775	594.778	592.993	47.6938	47.3823	7.02372	5.40383	1.63795	2.81593	20.3679	22.782	34.079	39.0754	78.884	77.322
RchiOBHmChr7g0199801	8.54531	5.9506	6.24267	1.90403	2.30712	2.4505	0	0	0.0776752	0.0894112	16.8692	13.9343	7.4462	7.87586	0	0	0	0	0	0	0.0630585	0.272512	0.283664	0	0	0
RchiOBHmChr3g0490231	3.66433	9.60831	4.35945	1.77356	2.58101	1.23886	8.65796	7.63347	14.7089	12.2481	13.2336	13.3052	43.4055	46.5852	143.245	71.2746	47.0293	31.1955	16.2552	14.8667	25.7113	32.9387	22.2177	16.7614	120.343	141.495
RchiOBHmChr6g0311061	49.1478	33.7011	37.229	11.869	11.052	15.5846	38.0159	39.5359	28.4496	27.2711	34.5862	37.0659	1.15019	1.04168	5.25741	8.49021	21.4589	19.1845	9.13067	7.96872	2.78114	1.54317	19.8009	19.2561	3.53889	4.56851
RchiOBHmChr5g0075821	5.63947	4.41405	4.27704	1.90932	1.31215	1.34035	0.247686	0.510722	0.467346	0.717276	12.5304	15.023	4.87201	7.7297	0.602639	0.12799	0	0	0.124869	0.351281	77.0186	89.4136	2.16183	0.566809	9.6345	11.1846
RchiOBHmChr3g0449921	25.759	40.539	33.9746	10.544	11.2087	10.4374	20.2919	21.5749	7.54685	7.64466	18.0762	17.1817	249.319	252.881	126.044	172.649	153.789	153.804	173.412	192.087	115.073	110.874	116.808	120.429	198.442	208.633
RchiOBHmChr4g0438751	5.38351	5.29045	4.13427	1.85217	1.21321	1.69368	29.8499	23.1206	38.872	38.0957	25.0992	22.7747	5.48204	5.582	2.04845	2.17529	29.0653	25.1606	0.675255	0.63321	32.7295	30.8219	24.5239	35.1179	21.1249	17.9816
RchiOBHmChr5g0037831	10.0766	11.6005	9.98299	3.69606	3.25448	3.19451	24.3508	24.4777	41.0195	37.8515	22.063	17.8081	4.97665	3.73528	2.00395	4.11728	44.5739	45.3534	0	0	1.78273	0.869193	34.2987	36.9177	30.2657	33.4337
RchiOBHmChr4g0427611	25.6682	35.1143	26.8962	8.78159	10.3866	9.04157	2.16462	1.87932	0.501581	0.879794	0.768475	0.916389	16.8234	18.0862	6.54176	1.05968	6.83674	10.745	3.1398	2.01074	23.2295	26.5467	3.62858	6.50044	64.5615	77.8635
RchiOBHmChr5g0061851	16.3217	12.2136	15.4076	5.0068	4.29323	4.87278	14.9012	16.0815	12.3576	11.9192	30.115	30.4483	10.4828	11.1896	9.03471	9.09731	34.1135	29.1696	10.6323	11.9019	46.2032	51.0976	33.7018	34.5127	20.5537	20.3861
RchiOBHmChr3g0491071	5.2159	4.66809	5.64261	1.89264	1.53116	1.56091	1.49907	1.05324	1.88568	1.46716	1.50472	1.15873	4.84326	4.72722	0	0	0	0	0	0	0	0	0	0	0	0
RchiOBHmChr2g0160761	14.7181	21.5386	15.4976	6.94255	5.3555	4.24707	3.34204	1.84712	3.72721	2.69394	1.17032	0.943759	7.92631	6.59162	8.51704	23.5012	10.3379	9.74857	12.5409	9.96833	6.68498	6.65982	8.98991	9.30373	41.7037	33.7656
RchiOBHmChr1g0365901	73.1721	101.776	95.95	29.317	26.1325	32.3619	416.422	401.555	478.445	483.825	317.959	303.893	216.46	221.179	0	0	0	0	0	0	0	0	0	0	0	0
RchiOBHmChr7g0208781	3.7906	5.8631	4.17789	1.47912	1.76772	1.20646	65.5749	59.6012	30.4943	31.5377	18.7285	19.8691	61.8004	64.1481	105.673	101.464	33.2689	28.7886	13.7668	17.564	487.247	493.688	262.919	289.583	63.4389	60.5331
RchiOBHmChr5g0041351	9.03753	9.30472	13.0176	3.71265	2.57636	3.93186	3.3991	4.2379	0.0994353	0.228918	10.2833	9.33138	1.01406	0.375402	0	0	0	0	0	0	0	0	0	0	0	0
RchiOBHmChr2g0089801	21.2131	10.4868	15.1173	6.10231	3.90766	5.20626	6.78445	6.79482	48.7665	53.4449	266.641	258.952	0.138148	0.876714	5.97398	7.17859	14.389	13.8443	2.76883	1.06912	17.1556	11.406	72.5724	70.2351	491.396	563.241
RchiOBHmChr6g0283821	25.3795	20.8663	15.3093	6.88564	5.88199	7.26273	91.1369	91.4989	374.669	375.644	106.251	108.94	4.55551	4.25471	11.5028	11.8411	2.43133	2.19472	1.86459	3.17388	17.0166	12.9158	14.5524	21.1043	7.47385	9.1504
RchiOBHmChr7g0183391	3.25962	3.10561	2.78567	1.04196	0.849617	1.09931	52.9989	54.6411	140.598	130.212	85.7934	89.0403	8.42202	8.44234	53.9325	77.6269	2579.66	2630.18	4090.61	4406.08	7.4052	7.50666	50.9957	46.7925	4.81384	8.52233
RchiOBHmChr2g0119351	7.97191	19.8393	8.93754	3.4281	4.90239	3.62466	1.34086	0.760323	1.265	1.57747	1.02962	1.58501	102.131	95.1177	40.4538	24.5106	4.95045	4.82106	11.6607	18.1451	14.7197	20.6369	4.38869	4.8328	6.80721	5.42072
RchiOBHmChr7g0182001	42.5066	63.947	49.6077	15.9254	18.7625	16.2086	101.221	101.414	131.988	125.824	531.757	532.164	206.387	210.768	101.849	83.6049	96.2339	95.6858	90.4648	85.4041	675.353	656.053	233.441	240.891	205.64	208.353
RchiOBHmChr6g0283201	2.99714	2.37118	1.79256	0.956608	0.715472	0.648019	30.3511	31.9633	31.0605	35.6914	15.4909	18.2848	2.49304	3.19916	1.33508	1.77217	41.8038	44.8942	0.69158	1.05384	1.05065	0.454047	29.618	36.3368	29.2305	33.1703
RchiOBHmChr6g0245291	39.7454	52.6602	40.2263	15.0986	12.9308	15.3131	0.49173	0.594841	2.57728	2.30214	8.81341	8.76579	74.0708	77.8629	14.357	12.4339	47.6748	54.3443	112.944	118.588	96.8145	102.977	22.3479	19.985	51.7938	52.1713
RchiOBHmChr7g0199791	7.58385	4.84544	4.72637	0.845503	1.65822	3.21834	0	0	0.155782	0.0448298	5.50443	6.82497	4.60723	4.32695	0	0	0	0	0	0	0	0	0	0	0	0
RchiOBHmChr3g0480981	1453.63	1569.18	1433.08	485.958	479.914	492.009	6.22236	7.5238	11.7026	10.4311	90.9437	87.8016	54.1191	53.9767	2.49875	4.58892	31.2396	34.7535	3.95925	4.36959	121.84	61.9854	51.2291	41.6398	0.552912	0.58983
RchiOBHmChr3g0463181	12.5867	8.93307	14.2612	4.35025	3.42512	3.94218	54.9426	60.89	60.6175	56.2007	136.276	123.576	13.3451	10.4974	39.3062	57.5956	0.614762	1.07765	0.793283	0.991851	69.2297	78.5857	38.1902	29.1673	0	0
RchiOBHmChr3g0466801	3.27866	2.15028	2.36865	0.808937	0.924283	0.824773	2.97223	4.24292	0.862793	1.86216	2.7264	2.5349	0.391065	0.0387777	0.667538	0.23629	1.44705	2.01319	0	0.0540432	0.233478	0.0504496	7.19445	5.49369	0.52314	0.348793
RchiOBHmChr6g0285121	3.54856	5.37494	4.09671	1.85355	1.46058	0.893377	8.24033	9.58585	12.6423	14.1386	6.43733	6.80322	167.506	174.371	2.22513	9.107	7.27994	5.36851	15.3685	19.9509	27.9687	30.522	8.79613	9.94096	30.1351	33.1935
RchiOBHmChr4g0429311	25.7944	43.0812	28.2276	10.7377	12.4481	8.6099	19.1366	19.2346	50.042	50.5514	57.527	58.5338	168.089	178.036	85.812	35.2662	31.7709	35.0295	42.0135	37.6141	36.4576	37.0502	19.4723	22.1631	242.515	247.029
RchiOBHmChr3g0492391	15.3412	22.1612	11.7863	8.91236	2.9402	4.32168	0.703654	1.14912	9.33807	8.45653	4.95317	4.57078	1.73313	1.95725	0.753298	6.1668	50.4997	42.1321	91.8636	87.4742	21.0683	18.2593	45.1374	49.248	453.501	444.724
RchiOBHmChr2g0129921	1.91092	1.83003	2.64421	0.811398	0.511501	0.782158	4.25797	3.63244	2.13981	2.85601	1.04085	1.04818	2.78469	2.88872	1.05631	1.38057	2.38767	2.74457	1.97826	2.5458	1.17231	1.1422	4.46813	4.70006	1.55215	1.35011
RchiOBHmChr7g0213351	893.183	703.026	687.422	262.133	251.168	239.377	677.437	678.138	1480.78	1476.59	3412.52	3417.1	203.51	187.093	220.477	318.931	689.442	750.142	667.327	725.858	3117.36	3022.22	1037.66	1091.99	269.895	296.344
RchiOBHmChr5g0036891	1.62466	3.81467	2.34343	0.655026	1.06947	0.84149	50.4224	47.6238	2.20344	2.70544	2.94453	3.65575	10.2535	9.17259	0.656659	1.42145	2.67661	1.12729	14.2342	16.2432	399.313	419.619	29.4452	29.3843	21.0497	17.261
RchiOBHmChr6g0294511	8.45975	9.69851	11.3704	3.29867	2.96427	3.49243	1.22482	0	0.30814	0.177349	3.1867	5.27216	12.9889	14.4586	0	0	0	0	0.246993	0.231614	1074.92	1092.52	1.1253	2.01809	0	0
RchiOBHmChr6g0308221	1.30207	1.19239	1.38251	0.413782	0.330554	0.549901	0.188354	0.209726	0.112542	0.109091	0.0952883	0.0675633	0.0885967	0.0447247	0.128318	0.0875979	0.123628	0.0442273	0.00949572	0.00890445	0.0192346	0.0249371	0.233618	0.0689654	0.0646466	0.160914
RchiOBHmChr7g0214811	59.3177	58.9432	55.1938	17.9672	21.1318	18.1339	58.8206	60.6881	20.565	19.8582	69.2249	66.7857	136.504	131.384	324.705	169.142	50.7443	66.2977	119.098	105.837	153.391	153.598	53.6414	57.9474	2.09205	1.80664
RchiOBHmChr5g0063361	4.60614	9.16679	7.01195	2.18197	3.40138	1.21874	55.2911	53.2729	62.2253	62.2429	121.53	116.593	40.137	35.578	0.365646	0.873642	11.4197	14.8869	58.8426	51.3008	26.5368	26.8602	1.63959	1.77685	0.537284	0.076421
RchiOBHmChr5g0031681	6.92229	6.33423	4.97603	2.02124	2.7974	1.15405	24.9872	32.2656	35.0051	30.537	40.6449	41.7622	12.9588	13.8383	0	0	0	0	0	0	0	0	0	0	0	0
RchiOBHmChr2g0129041	5.21381	6.13163	5.85615	1.93358	1.9909	1.76114	12.9326	9.75439	9.41827	7.57657	27.4863	26.2468	72.11	76.7133	19.4592	17.4985	5.90359	3.29641	1.3726	2.17204	19.7231	15.9956	10.8656	12.2275	7.49518	12.0454
RchiOBHmChr3g0453441	206.558	151.893	133.023	52.3361	57.1954	53.7525	263.885	261.945	89.0447	89.2905	121.668	121.376	52.3463	57.4906	49.4835	68.6685	179.058	173.188	64.4359	54.861	103.844	109.667	176.043	134.091	52.4882	47.1657
RchiOBHmChr7g0237711	6.97137	6.04844	6.48353	2.5444	1.43947	2.51439	1.72137	1.2068	0.460128	0.623117	8.30408	7.46566	1.47215	1.19702	0.293176	0.933983	0.887726	1.56625	2.777	2.88891	15.1175	13.5221	6.44465	7.5239	23.9276	23.2668
RchiOBHmChr7g0209491	2.98317	7.85251	3.04793	1.53952	1.48608	1.57946	0.0952639	0.366672	0.19972	0.206907	0.160646	0.14497	1.81954	1.46494	0.370855	0.886087	12.4756	14.2415	61.6659	58.9071	0.0972826	0.11211	1.19616	0.81388	2.17975	2.48031
RchiOBHmChr5g0043941	4.56689	7.3819	3.98258	1.88444	1.82241	1.572	0.856132	0.772744	0.772137	0.725073	0.49032	0.337122	0.594036	0.536988	0.0393025	0.0834719	0.14389	0.113789	0.0732925	0.0763654	0.635086	0.670103	0.378445	0.177436	0.147844	0.0591432
RchiOBHmChr1g0346851	0.482922	1.1747	0.53905	0.285765	0.268549	0.166182	0.349182	0.334081	0.377742	0.262911	0.605659	0.50101	3.03406	3.4397	1.94385	2.3096	4.16467	4.26352	2.78842	3.63166	3.23775	3.2669	3.11828	2.88945	10.4186	10.2278
RchiOBHmChr2g0084361	64.8705	87.7163	78.9879	25.4169	26.5513	25.0359	11.1171	10.7331	14.8153	13.0607	21.8406	19.8404	136.448	137.416	2.48821	3.38449	5.36015	5.32873	4.31569	5.89391	49.3125	53.803	23.8852	26.2953	66.5512	61.3184
RchiOBHmChr7g0228631	1.57535	1.46999	1.34362	0.309035	0.633146	0.535644	1.18015	1.33388	1.23709	0.791114	2.9378	1.99547	5.30813	5.48591	0.765706	0.722769	1.0246	0.718433	0.35257	0.537253	9.19492	8.17878	1.2449	1.44036	2.80034	3.52076
RchiOBHmChr1g0323431	1.84322	2.63639	1.78608	0.718903	0.573722	0.807833	0.191822	0.124905	0.0698479	0.0804012	0.313747	0.355558	2.14129	2.28768	0.00982563	0.05217	0.0189329	0.0237061	0	0.0477283	0.195887	0.142575	1.27076	1.0258	0.0808522	0
RchiOBHmChr7g0205641	1.19678	1.22798	1.3117	0.445469	0.546041	0.235506	3.5427	3.82105	1.61114	1.22323	1.89072	2.20386	1.86449	1.95975	1.69741	0.901252	5.41712	2.68754	0.769362	2.11284	4.5083	3.12689	26.7399	36.819	25.0042	38.3809
RchiOBHmChr5g0063331	31.9833	75.1226	49.8365	16.1197	25.8452	10.5173	118.823	118.895	97.2188	98.1976	117.809	120.463	177.368	177.009	2.33757	2.76951	7.27751	7.73725	25.2384	21.0018	21.6695	24.4059	1.78726	1.68983	1.33988	0.532974
RchiOBHmChr6g0300561	15.059	11.9072	13.574	4.91917	3.86095	4.80137	31.1418	31.3133	18.9412	20.1316	28.1981	29.2775	4.23409	3.98532	10.5105	12.8049	56.6925	51.4997	37.064	35.8476	17.525	17.2074	31.6753	33.5311	14.5271	12.2411
RchiOBHmChr2g0127101	9.93738	18.4262	10.5234	4.31433	5.23052	3.43197	15.2616	12.7711	16.2032	17.1373	17.2039	16.6277	106.319	100.4	20.266	25.4754	5.54881	2.50745	8.20993	9.21323	8.76941	9.54314	2.49364	2.1179	3.00336	2.55225
RchiOBHmChr7g0179911	11.9822	13.6294	11.5893	4.49154	3.6685	4.30164	112.792	111.982	121.965	112.806	61.4954	66.305	57.7146	60.4416	44.3913	69.1541	444.014	509.74	848.646	875.896	567.196	598.467	118.927	117.373	10.9423	14.7888
RchiOBHmChr4g0387801	332.169	867.455	358.785	170.845	209.356	142.093	7.33997	8.52033	7.01019	7.28211	6.75856	9.04217	14229.2	14933.4	15.4511	27.7021	0	0.255332	1.80907	1.33658	62.0183	79.7092	7.54283	12.1435	0	0
RchiOBHmChr3g0452991	0.717293	1.49069	0.84039	0.221983	0.454795	0.347037	12.8727	15.2497	10.4001	10.6329	12.9338	13.378	17.4832	14.65	0	0	0.0654207	0.368612	0.351743	0.131936	46.6326	44.4312	82.5632	80.7903	10.9356	11.9212
RchiOBHmChr4g0446271	0.838916	2.21591	1.30642	0.69315	0.500995	0.238822	0	0	0	0	0.307845	0.308671	4.9786	5.07322	0	0.831529	0.355022	0.111132	0	0.178997	2.89989	1.87981	6.56595	9.57438	4.81905	3.87005
RchiOBHmChr2g0142131	40.6444	44.7019	41.3994	14.5507	13.4261	14.5473	59.1045	65.2897	54.2549	51.1154	118.532	115.283	119.69	111.614	28.532	26.3642	27.9673	30.3184	23.0699	26.4945	91.9382	89.8554	49.7591	51.875	57.6064	55.9445
RchiOBHmChr4g0428421	2.0226	2.86204	1.22717	0.74091	0.442739	0.881316	8.47657	6.7729	9.4708	9.32328	4.25589	2.99007	1.62065	1.31327	0.178478	0.484351	5.42609	4.5214	0.657444	0.924761	10.9243	9.78373	6.571	5.74477	4.47586	4.60063
RchiOBHmChr2g0114511	1.7941	2.35993	1.26995	0.620696	0.503489	0.703576	4.41015	4.54183	1.91738	2.02388	1.38463	1.60315	0.463729	0.498661	7.07139	8.79189	25.4664	28.3218	24.7604	25.3036	1.62425	1.22306	46.12	44.1192	6.29995	6.64706
RchiOBHmChr5g0004111	2.71681	2.8726	2.73282	0.977751	1.12359	0.668748	6.04659	6.41681	8.0877	7.73374	4.71954	3.65431	1.41345	0.875129	2.7462	2.99956	5.29162	4.16472	1.30062	2.02002	1.31727	1.38759	5.88862	7.49049	2.49036	2.06627
RchiOBHmChr4g0447081	1.76859	1.15545	0.984725	0.516183	0.447424	0.342087	0.949103	1.32475	0.811223	0.845697	0.536431	0.968168	0.655599	0.404499	5.90928	8.21178	46.3447	50.2001	1.66855	1.48412	1.80175	2.73866	4.41584	4.82283	22.2456	21.0133
RchiOBHmChr3g0466201	2.81178	1.89942	2.23911	0.695701	1.04658	0.586802	0.250469	0.964059	0.892683	1.02756	6.6373	7.07862	2.71328	3.22857	0.487528	0.431428	2.81823	3.52874	0.505087	0.473637	0.426294	0	7.59391	8.55946	0.191034	0.101895
RchiOBHmChr3g0488571	0.586562	1.28946	1.03799	0.288659	0.368727	0.32529	0	0	0.21434	0.0290265	0.173855	0.196111	14.624	14.0625	0.390198	1.01517	13.2893	11.6736	3.19358	2.27448	31.5668	30.1146	22.0645	26.6808	0.435754	0.709506
RchiOBHmChr1g0315691	3.39717	2.8281	3.13397	0.999628	1.23406	0.917277	18.2616	18.386	17.9809	24.2537	16.2016	18.8917	3.66209	5.29743	9.07022	12.7556	23.1456	19.5177	2.28573	3.8105	6.30193	1.44508	22.679	20.6357	11.5268	12.6039
RchiOBHmChr4g0433191	0.987823	1.38484	0.613959	0.370681	0.352135	0.279254	7.56655	6.19034	3.6943	3.8538	2.28466	2.07501	16.6748	16.8391	0.396981	0.021078	1.01354	1.3409	0.925376	0.771339	1.39542	0.450031	3.09176	3.37908	7.90992	8.43806
RchiOBHmChr7g0243641	5.60656	5.66144	4.49506	1.79298	1.4745	2.09398	0.279723	0.248459	0.730792	0.514071	0.0155507	0	1.36174	1.54737	6.15669	20.1251	12.872	9.44801	3.49295	3.64165	2.2852	1.42437	9.40998	8.82384	7.85278	8.87605
RchiOBHmChr2g0146371	25.2514	46.8293	35.9171	13.6559	11.8004	11.0057	34.9787	35.8852	65.9544	63.7505	18.7784	18.4652	46.4043	48.8226	8.61521	18.5565	392.633	330.299	364.97	321.473	168.389	156.011	693.243	778.282	1361.26	1345.03
RchiOBHmChr2g0118761	0.809564	1.37268	0.61162	0.252833	0.528485	0.151956	0.430377	0.391191	0.54137	0.527783	0.234866	0.223403	2.64408	2.53247	0.333375	0.381248	0.0494135	0.11343	0.203686	0.0664361	0.215264	0.108532	0.072626	0.209036	0.0502425	0.0321583
RchiOBHmChr3g0470941	1.03981	4.27071	1.8548	1.13762	0.431411	0.86267	0	0	1.37108	1.01822	44.9773	41.1845	1.08252	2.43309	0	0.218028	0	0	0.85084	0	7792.58	8176.69	7.17142	19.7614	0	0.343292
RchiOBHmChr0c28g0500921	4.33924	6.9918	4.57678	2.33342	1.68001	1.36735	0.0486365	0.0133716	0.0917697	0.117373	0.0117167	0.0317201	1.41423	1.17687	0.0631127	0.268081	1.47453	1.04686	0.784629	0.383215	1.02645	0.572374	1.40012	1.46917	1.96606	1.46417
RchiOBHmChr5g0074001	29.982	36.3831	27.7177	9.9414	13.7091	8.43542	2.00171	2.1763	6.75267	4.08408	85.2872	82.9578	160.452	159.875	0.442755	1.41051	2.38879	3.63196	22.6598	19.6144	262.391	277.704	53.4166	56.8012	0	0.222089
RchiOBHmChr4g0420971	117.202	212.301	136.46	52.3822	61.0374	46.3927	55.3945	56.552	55.1789	54.3499	68.1759	72.0264	1604.74	1572.39	198.793	149.6	221.488	241.384	290.746	290.915	1603.58	1547.82	488.251	513.982	3524.68	3453.82
RchiOBHmChr5g0041291	2.34353	6.5085	2.89337	1.02484	2.05562	0.930913	0.429868	0.1013	0.270365	0.489052	0.221908	0.0400507	35.0302	32.9547	50.2033	27.9252	17.6774	18.1686	1.23837	1.16126	1.00338	1.84287	6.77043	3.93487	43.559	44.2189
RchiOBHmChr5g0022651	12.9137	11.4843	12.2912	4.8373	3.54147	4.20565	146.29	144.215	145.571	144.492	149.903	152.994	67.1722	75.7348	65.2545	50.2162	89.1597	97.3252	69.7118	65.5358	41.0821	35.3542	109.443	117.967	40.8448	43.1468
RchiOBHmChr6g0303091	49.4636	68.8451	58.9303	19.5703	19.8133	21.5698	2.6434	2.98941	4.43922	6.47127	10.8717	10.1662	110.191	114.497	36.8125	37.8244	137.651	127.146	135.023	128.084	40.0181	40.1685	28.142	27.4147	347.784	360.029
RchiOBHmChr2g0156581	0.541618	1.44797	0.65532	0.247619	0.439449	0.215146	0.29836	0.316394	0.884651	1.09546	0.246433	0.180687	0.382746	0.260248	0.933341	1.18936	2.31799	1.57629	0.150415	0.402999	0.805232	0.489062	6.69631	5.83283	6.02224	4.3956
RchiOBHmChr4g0406221	2.82528	9.87102	3.43456	1.53992	1.38994	2.64769	0.553832	0.456795	2.96083	3.2077	7.47155	7.76585	260.152	264.079	23.8959	41.736	0.216376	0.325112	0.884163	3.44735	3744.25	3941.67	820.324	1264.23	2426.75	2179.57
RchiOBHmChr2g0127121	21.063	28.5455	17.9922	9.13702	6.64525	7.43891	1.60501	2.42695	12.7866	10.6516	13.2751	14.6547	39.5014	38.2318	0.60746	4.60765	6.10336	5.86241	17.8912	12.6461	29.5023	20.2263	10.0764	17.4668	30.6037	28.9471
RchiOBHmChr7g0191831	32.372	60.6545	37.6973	15.2054	16.8453	13.0226	20.0272	23.5807	11.2163	12.0912	6.18849	4.19998	285.724	283.118	26.2406	122.651	411.933	406.364	421.771	438.8	232.628	233.481	133.026	136.747	2162.26	2003.39
RchiOBHmChr1g0356851	32.2275	54.2716	33.7026	14.9452	14.9787	11.503	3.5944	4.1744	6.42727	7.46839	2.37639	2.17603	31.388	32.6852	3.87467	6.9298	13.451	13.1141	6.50075	6.03502	7.2753	5.76176	54.7036	66.6155	15.0474	13.298
RchiOBHmChr7g0187591	47.4155	66.7795	44.8416	21.3166	15.8226	17.718	2.51868	3.74883	14.075	15.8034	10.0639	9.45939	43.7491	43.8969	16.1726	40.8106	99.3248	86.7058	82.4912	72.2361	36.393	32.2216	93.0136	105.338	413.812	387.984
RchiOBHmChr4g0433571	1.82905	1.65111	1.37085	0.689717	0.659437	0.295352	2.80542	2.62657	2.95668	2.36042	2.84948	3.06592	0.972673	0.874478	1.9186	2.19412	136.858	169.937	126.907	123.665	106	117.651	344.547	361.393	25.4163	23.782
RchiOBHmChr2g0152411	26.0062	31.1488	27.9692	9.18476	10.8362	9.37757	31.58	30.9219	57.2499	54.7738	303.781	295.173	429.96	424.026	13.6415	11.5191	29.4527	23.1974	44.1013	34.0104	129.859	135.939	34.2894	38.6461	30.3332	28.4425
RchiOBHmChr4g0431401	3.96368	2.76487	4.86612	1.24399	1.31396	1.47344	0.838561	1.585	1.01087	1.01183	2.80293	2.41547	0.627511	0.355564	0.238033	1.01108	0	0	0	0	9.20555	10.0536	0	0	0	0
RchiOBHmChr3g0460861	10.538	17.8087	10.9648	4.93214	4.5453	4.12108	1.35974	1.43257	3.58937	3.66462	3.4	2.96464	11.5184	12.4838	6.69396	6.06216	15.132	13.5751	8.36609	7.51672	37.7138	37.3797	9.36488	11.3927	65.6653	68.4629
RchiOBHmChr4g0399741	88.3909	59.6491	67.278	25.8277	24.1863	24.6528	270.626	276.477	437.056	430.466	1520.94	1599.9	24.9441	33.5681	225.06	206.914	642.782	573.938	339.876	322.357	42.9753	27.1226	374.009	350.32	90.3334	93.0594
RchiOBHmChr6g0276171	9.48897	15.8448	11.8062	4.22751	4.38738	4.26877	25.4985	29.0934	11.2553	9.66076	6.46664	5.7344	101.692	94.5646	20.3862	36.8826	165.857	174.396	113.738	129.102	60.0529	58.5239	44.2874	41.0943	21.3611	21.3355
RchiOBHmChr7g0180641	3.67372	3.69016	2.5571	1.36069	0.885267	1.19524	11.9288	11.3963	10.6891	13.7046	7.08996	6.75855	1.49679	2.06227	0.672365	3.71278	18.2676	26.0633	0.139316	0	2.16353	3.9432	16.1221	18.508	14.9119	13.3781
RchiOBHmChr7g0187321	20.9062	23.4702	24.9934	8.25199	7.81247	8.0311	44.3063	45.0995	28.3147	32.0481	15.4238	16.6559	76.9348	74.381	0.154138	0	0.297008	0.0464858	2.79457	9.95815	11.6044	8.31747	45.1445	33.5978	2.85381	2.36783
RchiOBHmChr4g0423641	112.911	132.615	107.464	40.0018	44.2059	38.4775	78.0668	78.5172	219.155	217.972	86.6271	90.4925	50.5128	52.1569	0.711311	4.13083	136.098	269.625	1.03631	1.05816	51.5691	49.0674	16.8083	18.4817	313.275	269.467
RchiOBHmChr2g0100891	261.361	424.198	286.112	109.541	129.354	98.9876	52.2819	57.1456	79.4488	80.4513	108.371	104.825	2671.65	2685.32	14.2679	19.9942	26.9277	28.4507	0	0	1187.9	1201.97	519.394	575.817	67.7785	63.8889
RchiOBHmChr2g0142071	52.1245	96.0885	69.3831	27.6879	22.3933	25.6861	0.171916	0	0.180211	0.165951	16.7318	17.603	137.715	451.756	0	0	0	0	0	0	8.25126	11.785	2.26392	3.30469	0	0
RchiOBHmChr2g0086671	5.15386	6.2123	4.23187	2.23196	1.49033	1.6768	0.0387683	0.223829	0.390132	0.308741	1.17677	0.60682	3.48132	2.73535	0.113191	0.0400665	4.65295	9.28519	10.515	8.90726	77.6355	81.3704	1.03293	2.4841	2.7499	3.31202
RchiOBHmChr1g0383231	2.7041	11.3329	4.5118	2.26412	1.45702	2.76051	0	0.0256787	0.0783261	0	20.5657	20.2847	2.10347	1.5419	0.0303003	0.546998	0.11677	0	0.0313916	0	4332.15	4408.43	5.89245	10.801	0	0.493962
RchiOBHmChr7g0178031	80.8692	101.651	84.3594	29.7333	32.5786	30.7355	4.85299	3.6508	10.2637	8.89946	33.3195	34.4504	177.053	184.483	41.1841	53.2139	71.4315	73.4116	71.1662	61.4405	87.5983	88.0919	65.1899	78.6672	267.66	254.225
RchiOBHmChr2g0088731	4.58446	2.03332	2.64788	1.02111	1.05607	1.16603	59.1414	58.0347	59.8012	62.9447	54.5055	55.714	11.7153	9.6364	7.92039	8.98544	33.5568	29.0794	29.9685	30.1098	14.0405	4.05999	83.5476	78.613	3.00717	3.26964
RchiOBHmChr7g0233781	7.03482	4.88952	8.09557	2.05231	3.05851	1.8502	11.6202	10.9534	22.4475	17.1689	54.673	45.2391	65.1029	66.1243	5.65455	5.39193	15.5652	24.0833	14.4662	16.0319	22.1587	23.5476	18.0839	19.7539	6.24012	7.52503
RchiOBHmChr5g0003061	6.14916	4.14496	7.30475	2.49786	1.83708	1.78273	11.9715	18.3009	20.5113	21.2941	25.21	23.3557	7.23741	6.09134	0.502199	0.639951	0.967681	1.33281	1.66492	3.22007	9.59044	7.10499	20.4805	19.9328	0.472279	0.125953
RchiOBHmChr4g0419601	1.84715	2.1512	8.44193	1.57883	1.66602	1.07782	8.15552	9.56669	6.72522	7.47892	8.64467	5.55532	13.9496	8.60677	0	0	0	0	0	0	0	0	0	0	0	0
RchiOBHmChr7g0243541	13.2222	20.6771	13.1004	5.81502	5.29153	5.29913	0.650537	0.822719	2.45493	2.30777	0.54851	0.890971	1.01998	0.764993	0.0633122	0.470626	13.0739	8.83415	7.0184	6.78641	4.03022	1.97136	10.4196	13.0013	14.8603	13.3118
RchiOBHmChr4g0435491	1.40607	2.52682	1.82188	0.590724	0.674153	0.755976	0.537151	0.398732	2.5338	3.92774	0.854052	1.36626	5.92604	5.61203	14.5853	18.6527	25.0823	32.604	120.181	79.2286	10.4221	7.25381	16.4831	17.4058	125.856	126.917
RchiOBHmChr5g0036541	119.821	163.419	116.333	50.2097	45.461	44.0743	24.7456	24.117	39.9816	40.7115	29.4209	30.6603	41.818	43.3021	14.7818	53.044	252.373	191.146	98.4741	89.8269	56.1058	45.5748	233.212	234.151	416.738	407.08
RchiOBHmChr6g0258921	15.986	13.6092	15.5333	5.57275	5.26758	4.92935	284.265	280.947	206.943	196.026	139.232	130.136	66.9579	69.5919	154.599	136.076	280.561	300.546	226.408	233.559	88.743	87.2594	278.735	263.027	37.8399	45.6749
RchiOBHmChr2g0170351	39.419	60.6698	37.5639	14.6578	17.6766	15.8783	10.4965	10.7999	26.7738	26.4821	25.478	27.3827	123.137	126.076	4.41123	10.711	102.944	100.267	75.0726	68.9947	94.5753	91.9665	66.2878	64.5394	72.3244	73.4656
RchiOBHmChr5g0056431	8.8926	7.33365	7.3489	3.5196	1.61094	3.1533	15.0754	17.591	19.2586	18.6615	8.87687	7.47873	1.56404	1.57604	1.03424	3.24374	18.6773	14.5945	0	0	0.504748	0.174504	16.2573	17.1702	14.8721	13.3315
RchiOBHmChr1g0369681	112.965	129.29	99.039	41.8485	36.1045	41.8227	8.34662	8.91889	22.6304	22.0797	44.6735	41.9646	41.8564	42.0921	0	0	0	0	0	0	0	0	0	0	0	0
RchiOBHmChr2g0168851	47.1735	39.9678	42.4074	16.7101	14.8361	13.8804	18.6046	20.0159	16.294	16.4877	35.2864	37.9727	13.5615	15.1233	11.1641	10.087	20.9245	31.8585	137.045	138.059	72.1807	56.3885	90.1808	89.3855	6.42402	6.70588
RchiOBHmChr5g0012871	8.77735	8.70039	5.62333	2.8992	2.66531	2.54108	28.6704	28.6312	38.0493	36.4093	18.7794	19.0926	29.7451	30.0189	4.63959	6.66166	34.123	32.872	0.270799	0.126969	3.35976	2.252	56.6299	60.2935	43.3245	48.8395
RchiOBHmChr6g0291081	2.70715	2.60355	2.2934	0.516936	1.00478	1.19466	6.02787	6.66023	4.41458	4.42286	6.31739	6.01881	0.736453	0.992055	0.806446	3.79493	0.3961	0.572263	0	0.0153621	6.65336	8.73345	6.80694	5.57721	0.371765	0.277611
RchiOBHmChr4g0399751	85.0268	60.767	70.2043	24.1237	24.6752	27.3134	140.605	137.564	218.578	222.187	822.976	827.722	16.0014	16.045	111.6	132.933	325.803	293.106	162.814	166.571	17.5303	14.4976	167.135	182.177	51.642	54.7132
RchiOBHmChr3g0470231	38.3268	35.5776	44.8662	14.7639	12.8621	14.2001	64.1986	66.9553	11.8634	9.47733	68.9156	63.1997	1.64533	1.67406	0	0	0	0.294613	0	0	264.2	281.583	69.9336	71.3223	0	0
RchiOBHmChr2g0115021	6.28507	12.7587	7.47917	3.38542	3.1533	2.77789	22.1441	19.6036	21.077	21.162	11.3094	11.7462	138.88	127.597	138.503	107.563	78.0707	46.97	93.9244	83.1907	69.4984	82.6104	105.522	105.539	101.506	115.67
RchiOBHmChr1g0317351	7.86148	8.05722	7.71973	2.21787	2.85856	3.32253	8.12584	5.94946	6.91453	6.92109	9.95524	9.94732	10.5542	11.0256	0	0	0	0	0	0	0	0	0	0	0	0
RchiOBHmChr3g0493101	1.75518	2.34115	2.77268	1.09772	0.524763	0.783445	3.37754	2.10921	3.7327	4.61106	1.25537	1.10139	0.412649	0.392814	0.375671	0.797861	25.6976	15.0118	65.4831	53.5133	3.84329	3.23664	38.4343	29.636	10.3779	20.1394
RchiOBHmChr6g0276971	35.6654	65.1845	41.7702	15.4824	18.8737	15.9814	0.584063	0.802881	2.2653	1.55044	14.211	13.5226	693.644	690.059	18.9476	46.6801	94.6519	76.1144	427.443	502.439	375.558	337.402	104.102	119.758	739.255	706.284
RchiOBHmChr5g0012331	1.93335	6.33849	1.88172	1.58365	0.531717	1.47425	0	0.037446	1.65618	1.67632	38.4225	39.4106	0.931865	0.893231	0	0.42229	0	0	0.457767	0	6046.63	6738.95	8.46752	21.0285	0.259706	0.831137
RchiOBHmChr5g0002761	70.7197	98.7629	74.9363	28.2092	31.3042	26.8599	160.155	158.568	227.49	221.741	295.802	293.331	2368.04	2384.18	395.156	796.736	105.336	85.3268	69.4656	76.5989	515.174	567.603	166.172	155.509	205.411	239.295
RchiOBHmChr2g0095331	2.36713	3.1703	1.23735	0.840438	0.995841	0.533176	0.369477	0.05079	0.348573	0.133746	0.31153	0.803226	4.21313	5.59814	1.01883	0.0636416	2.71378	2.53039	0.869251	0.0582233	8.48938	9.23981	5.48788	7.27144	27.5462	18.6383
RchiOBHmChr4g0401291	5.14332	3.16426	3.95031	1.62154	1.26215	1.45306	12.7806	14.1695	8.77115	9.25287	22.065	20.0979	0.477881	0.637196	0	0.0245741	0	0	0.0119874	0	3.67868	3.04312	7.90822	6.95407	0.136016	0.246667
RchiOBHmChr6g0278421	25.7341	30.7002	30.0131	10.9113	9.69668	9.95063	5.91589	5.89294	5.55423	6.02098	14.107	14.8366	47.6365	49.5967	10.7919	11.1352	15.4353	14.4614	20.4881	19.6447	15.9349	18.061	8.66484	10.6996	34.3311	28.043
RchiOBHmChr7g0180651	0.957889	4.42482	1.55385	0.864228	0.501794	1.10375	0.0600856	0	0.0377908	0	48.8093	43.6152	1.18189	1.63055	1.05259	2.11132	0	0	1.0905	0	8250.61	8683.83	8.55656	16.6101	0.756156	0.659981
RchiOBHmChr6g0278431	37.8014	49.8303	45.5257	15.0579	16.1387	16.1293	51.236	45.5318	41.4739	44.6138	111.002	116.916	385.979	381.25	145.845	91.188	164.37	179.775	238.767	244.535	207.857	186.143	106.048	125.422	385.35	382.164
RchiOBHmChr1g0334441	4.87906	4.1228	4.16024	1.69733	1.78187	1.17231	15.8367	15.4855	17.747	15.6941	30.8546	29.7365	5.11886	5.0983	0	0	0	0	0	0	0	0	0	0	0	0
RchiOBHmChr1g0342491	3.59208	1.93029	4.28485	1.81943	0.669058	0.973899	37.5282	34.8529	25.9165	24.7786	33.0347	33.7271	0.12838	0.101841	0	0	0.492638	0.440597	0.302712	0.0709658	1.1497	0.132494	18.136	15.9394	0	0
RchiOBHmChr7g0216771	2.18002	2.20498	1.73602	0.582295	0.481787	1.16364	7.85409	8.19272	6.46536	7.60945	12.1038	12.5045	4.54385	6.73889	0	0	0.1083	0.135604	0.698747	1.09206	48.359	40.5741	1.9101	0.634357	183.543	170.565
RchiOBHmChr4g0416811	25.7815	35.5573	27.9692	9.79062	10.0908	12.0306	19.5386	16.7012	13.4618	16.3316	16.6882	19.288	221.633	213.414	49.2675	65.6269	100.346	89.7755	44.3259	47.024	28.9313	29.0819	55.2403	54.1427	46.6371	43.7896
RchiOBHmChr6g0282601	3.60594	6.68864	3.61299	1.34572	1.72403	1.92088	0.0286526	0.307221	0.450526	0.331902	1.24246	1.55101	5.31745	5.30677	0.0278856	0.0592243	4.51352	3.46486	4.56461	4.95766	209.12	217.314	3.4222	4.09152	41.4671	38.8855
RchiOBHmChr1g0375701	1.69687	2.36116	2.31647	0.715772	0.664954	0.914151	11.4068	10.6995	7.83078	10.3093	4.74156	4.52197	273.341	285.016	5.65956	4.70011	61.5173	73.2626	38.7886	49.0618	15.4552	16.8458	12.9459	12.0111	2.38825	1.09188
RchiOBHmChr1g0371291	8.57683	9.79378	6.7642	3.24171	4.02033	1.66339	0.0279696	0	0.387012	0.404987	2.00118	1.65997	9.75944	9.05122	0.381091	0.0289062	1.04903	0.164187	1.15625	0.899137	86.9149	76.1093	24.3608	22.2741	30.7509	25.4309
RchiOBHmChr2g0135161	1.27027	0.333583	1.58676	0.408752	0.35229	0.382893	7.98788	18.8456	10.8074	14.9956	8.86079	7.14804	15.0132	11.6576	4.339	4.99162	4.79002	14.2853	2.52859	2.54678	5.97558	5.4927	4.77879	3.14579	4.5693	6.57476
RchiOBHmChr2g0119391	12.6071	28.3221	11.8357	5.64536	7.12385	6.16384	0.679467	0.538862	0.624589	0.416239	1.77537	2.65884	178.62	183.182	29.8847	24.3076	3.23453	4.93975	15.7835	16.2092	43.5	48.8539	3.52947	4.90393	47.9267	40.3464
RchiOBHmChr1g0346561	144.172	206.601	143.501	56.202	65.3522	55.9524	49.179	49.6704	46.0731	42.5566	176.324	178.576	562.077	557.655	9.94632	14.4609	22.5741	31.7279	26.7642	22.6981	1207.06	1286.77	152.06	179.879	66.8573	57.1742
RchiOBHmChr7g0242341	2.85337	4.36151	3.35894	0.954343	1.22829	1.66495	0.489161	0.806908	0.131853	0.556508	1.46459	1.4584	4.72128	6.1157	0	0	0	0	0	0	0	0	0	0	0	0
RchiOBHmChr4g0446771	3.83712	3.30069	2.8221	1.29589	0.970725	1.32452	2.38539	2.73352	4.10255	4.14166	6.19401	6.82864	3.48431	3.09341	1.31485	0.392697	4.43374	6.14633	135.284	170.79	217.811	241.563	20.3642	37.4094	15.1425	15.3291
RchiOBHmChr7g0196631	1.40272	2.72446	1.81819	0.638404	0.807347	0.689003	8.34912	8.48062	2.8196	2.29277	0	0	5.87409	6.83619	2.36163	6.92848	3.62505	5.891	18.7856	16.7215	2.14201	2.32329	12.243	12.1979	11.7164	10.2901
RchiOBHmChr7g0177841	3.80375	3.21614	5.11573	1.65516	1.06514	1.65944	15.7407	13.2079	12.9331	10.5396	14.9927	15.3692	12.3724	13.3332	60.3918	29.9027	6.05729	4.59336	3.30265	1.97864	1.39372	0.803076	10.7	9.41135	5.72518	3.9976
RchiOBHmChr5g0040581	2.16016	1.547	1.24237	0.723161	0.729887	0.307477	171.235	179.41	108.144	113.999	51.3074	51.4863	18.093	18.3984	3.73099	8.65769	62.1732	60.011	8.58969	6.17538	39.1485	50.3789	70.0513	64.8545	30.0514	37.4298
RchiOBHmChr7g0234781	2.28438	1.96239	1.5582	0.816519	0.509134	0.777004	8.39843	9.78526	8.30619	8.29539	6.88195	7.47281	1.62875	1.39795	80.2775	48.077	10.5095	10.3733	6.07554	3.24713	6.28086	4.46416	13.7971	14.0321	12.4301	12.0407
RchiOBHmChr7g0191981	1.37321	1.59853	1.08177	0.719383	0.334154	0.396329	111.459	112.241	119.063	119.519	30.1967	29.9521	0.449161	0.870977	48.3878	62.9029	293.885	210.948	7.41367	7.7245	0.476735	0.412049	127.172	118.745	116.099	136.172
RchiOBHmChr6g0279721	5.39886	6.70345	5.94734	2.10541	2.60903	1.77023	16.0615	10.513	10.1378	9.89014	8.2205	6.00175	7.77241	6.74733	0	0	0	0	0	0	0	0	0	0	0	0
RchiOBHmChr5g0003381	0.793995	2.39785	1.58691	0.39921	1.05697	0.256426	6.2638	3.19096	16.5116	14.0047	4.79322	3.84486	4.09648	4.87446	100.765	58.8332	7.51432	4.00142	4.27237	3.83215	2.16353	1.38215	2.70817	2.27661	11.3815	13.0408
RchiOBHmChr2g0135631	3.05012	2.1663	2.14921	1.04282	0.836675	0.778094	10.6531	10.1026	13.1644	13.0809	6.64771	6.51932	0.72244	1.01883	0.8678	0.679022	12.7612	12.2868	0	0.0443723	4.3132	4.22502	18.0229	16.5819	8.37575	6.98762
RchiOBHmChr1g0356941	0.432143	1.9502	0.83788	0.369369	0.513784	0.275081	1.35615	0.489361	0.159928	0	0.551311	0.884465	6.52394	6.84287	0.659924	0.43799	0.3179	0	0.854614	0.721261	25.0146	25.0618	0.934473	1.55172	6.01213	9.20656
RchiOBHmChr5g0065871	3.24233	3.88876	2.38929	1.15817	1.27768	1.00372	0.437093	0.360509	1.71818	2.29423	4.97531	6.48526	46.4461	45.5182	59.7676	30.3789	2.35659	1.28292	0.110178	0.206636	30.5753	25.4622	9.13593	12.2031	3.00036	1.20026
RchiOBHmChr2g0153201	1.91788	1.36683	1.64381	0.632012	0.54471	0.62022	22.1744	21.6761	29.9839	27.4358	11.3056	10.0238	0.769265	1.03475	13.5879	6.46688	44.7741	29.7069	11.9085	9.83586	1.99685	1.93302	16.3485	16.7179	12.4383	14.3189
RchiOBHmChr6g0299441	23.7375	41.2813	29.1784	11.6555	10.4491	12.1789	39.2616	38.0143	63.4706	72.5515	69.1592	71.7096	119.968	119.76	52.8693	65.6901	398.266	404.125	549.253	444.417	354.177	328.189	247.796	280.8	136.591	158.578
RchiOBHmChr2g0088491	3.32309	5.08061	4.10838	1.20618	1.50235	1.88833	1.20704	0.466004	0.403813	0.687941	0.167045	0.184242	6.74282	6.22008	0.699838	0.743169	2.81742	3.34681	1.26883	0.898437	2.20298	2.0174	1.25054	2.65643	0.528866	0.344775
RchiOBHmChr7g0218061	8.60751	12.9193	7.0514	3.52002	3.28852	3.62126	19.1609	21.6913	6.77389	4.44268	4.43492	4.8189	76.2576	79.1001	939.466	888.914	39.6901	49.6964	34.2196	24.3923	1.66255	0.884286	48.555	51.3567	0.859655	0
RchiOBHmChr6g0298001	1.15421	1.27146	0.636629	0.435617	0.296822	0.384055	24.9641	21.455	6.51022	6.71018	3.9604	3.24301	1.01252	1.0786	0.724264	0.524391	6.851	5.67909	8.79955	13.1131	0.552695	0.119426	3.4186	2.8177	4.91486	5.36687
RchiOBHmChr3g0462421	52.9696	48.2131	46.5042	16.2639	19.1544	18.6139	0	0	0.152065	0.210048	36.7292	36.1094	0.620317	0.984164	0	0.0499745	0	0	0	0	0.790078	0.170719	0	0	0	0
RchiOBHmChr7g0193431	20.4071	17.8996	16.9837	7.07111	6.18476	6.95692	194.39	197.694	204.31	194.184	394.993	412.918	58.6031	53.3936	84.757	84.7452	228.375	359.669	176.631	171.597	933.109	924.362	1202.1	1300.61	578.453	557.852
RchiOBHmChr2g0091061	3.88397	7.45591	6.04839	2.47876	1.70909	2.14819	0.818046	0.915684	2.44392	2.45359	1.14019	1.73394	3.0483	3.58758	0.938315	1.81166	7.67042	3.22427	21.6221	17.1267	11.5163	12.1714	21.0442	21.769	140.016	136.885
RchiOBHmChr2g0160371	29.4283	30.7616	31.0939	11.9019	11.9118	9.50149	44.0971	39.1789	35.6882	36.4442	49.679	48.4789	50.33	57.5786	30.1363	25.1326	36.5593	35.9739	27.789	26.7484	24.2541	24.1828	40.2908	35.2452	16.9711	22.6551
RchiOBHmChr6g0270211	63.4474	72.7542	67.8986	24.8511	25.4022	24.5703	141.181	146.107	124.164	116.285	159.516	167.017	69.6486	71.866	25.1662	32.9293	237.334	297.448	38.7193	36.0273	733.065	744.621	440.632	407.613	49.442	72.4765
RchiOBHmChr4g0429301	4.76511	5.01948	4.49099	1.46442	2.37281	1.37177	7.24935	11.5847	16.3001	14.3674	16.307	15.7795	6.50979	9.09858	26.2809	24.3494	21.7516	21.7032	12.426	10.6241	38.8656	28.3133	37.7142	39.649	18.6608	19.1326
RchiOBHmChr6g0274441	26.8712	49.1776	27.591	12.5932	16.2681	9.20199	221.023	212.675	332.74	328.861	385.283	381.975	1615.79	1583.91	10.4954	9.25803	5.29816	5.13722	16.9875	15.9624	42.3265	47.2574	4.36834	4.03687	14.6633	15.6003
RchiOBHmChr2g0121071	7.6445	7.31081	6.88061	2.7335	2.85686	2.41297	46.5632	42.1604	27.2688	27.3183	26.3835	25.3066	29.7648	29.602	0	0	0	0	0	0	0	0	0	0	0	0
RchiOBHmChr7g0181731	1.77558	1.7584	2.65531	0.705388	0.589528	1.00688	1.947	1.72223	1.29555	0.970366	0.693365	0.395665	12.1747	11.1606	0.590433	0.787383	1.2303	1.83863	0.839307	1.56075	0.345784	0.336224	1.77584	1.6789	0.936189	0.688757
RchiOBHmChr7g0193541	5.41239	6.69185	5.93127	2.06904	2.20061	2.37784	9.99141	11.9457	20.3837	21.1536	27.5487	26.0103	41.4678	39.7308	14.8719	9.6752	11.4941	11.336	4.65612	5.91422	32.6243	29.4945	31.5115	40.9256	121.32	116.099
RchiOBHmChr1g0357031	15.0185	10.2766	11.2003	4.6801	4.61513	4.11731	1.05971	1.46713	5.28442	3.04142	44.2561	46.9968	5.63193	7.44612	2.65202	3.91142	34.7064	31.6368	52.5084	60.4751	16.0392	15.2325	8.4843	6.65159	17.4928	14.6422
RchiOBHmChr2g0149371	10.421	10.5869	9.61073	3.88263	3.68488	3.70831	15.3315	17.1447	23.5448	21.1097	36.9115	30.8557	13.8358	13.9747	276.634	290.943	55.4738	69.4593	105.459	101.916	34.9626	29.5545	26.6161	25.7432	55.4181	60.381
RchiOBHmChr5g0064811	15.7583	15.8724	14.9894	5.25409	8.59615	3.33674	4.64044	4.38454	60.8289	60.3448	318.963	311.11	153.193	152.628	0	0	0	0	0	0	0	0	0	0	0	0
RchiOBHmChr6g0267861	1.64809	4.2996	1.31242	0.704341	1.02955	0.955112	151.723	159.326	16.9559	15.9874	2.01382	2.95311	148.881	160.922	28320.8	22891.7	482.769	496.113	479.308	456.643	2.27641	3.68913	434.827	451.719	13.5485	8.84191
RchiOBHmChr7g0186971	200.246	200.794	168.853	70.3235	68.3888	72.409	243.544	248.507	235.8	232.546	547.943	547.329	289.713	305.317	55.7836	58.1252	86.2744	82.9967	38.9849	39.2708	1037.42	1097.18	386.965	455.293	378.853	357.773
RchiOBHmChr7g0217081	3.28568	1.86903	1.8231	0.851576	0.839508	0.905193	381.237	380.669	447.446	433.663	209.177	211.041	9.63469	9.26913	64.0352	93.02	117.208	114.676	38.4273	33.7683	13.7074	10.8955	123.984	132.085	0.137113	1.17015
RchiOBHmChr7g0232221	9.72475	8.79801	8.77406	3.27446	3.12608	3.76016	2.76916	2.44385	1.49783	1.70409	18.432	17.6086	12.1017	12.418	2.23687	1.31647	2.233	1.78811	0.418814	1.25676	5.20323	6.03704	2.92579	2.88967	0.316809	0.371758
RchiOBHmChr7g0241671	1.88556	4.53623	1.64612	0.787921	0.948247	1.27805	4.25957	5.03565	4.73299	3.7006	1.02615	1.11121	8.13576	13.0041	26.3933	46.9569	73.2232	66.1788	88.0443	62.8278	42.1934	45.2408	38.8739	57.7062	829.094	828.827
RchiOBHmChr7g0186941	13.0473	12.0774	16.5452	6.02525	3.96488	5.58277	0	0	0	0	4.46254	5.27841	0.745868	0.520678	0	0	0.0654207	0	0	0	0.0712492	0	0.0320509	0	0	0
RchiOBHmChr5g0070731	9.03898	9.72448	9.38973	3.3801	3.985	3.12815	11.011	11.8932	6.97163	7.15501	31.583	27.0136	22.7347	21.2126	8.85461	6.1334	39.7803	29.0218	30.7845	35.3599	10.1174	10.9308	11.7386	12.3239	20.5652	22.3872
RchiOBHmChr2g0158571	10.5259	8.38472	10.0903	3.58942	3.30412	3.97575	70.3756	75.6712	44.1468	36.6122	109.978	120.212	113.992	117.862	0.627541	0.666396	27.7253	20.4397	8.73049	8.01268	421.042	414.646	62.034	76.0555	18.0208	14.8396
RchiOBHmChr1g0360631	1.56939	1.13076	1.34995	0.441479	0.655624	0.412034	4.37093	4.59418	6.4498	6.81575	1.70096	1.68847	0.239623	0.395381	0.283595	0.637056	7.66088	7.82908	0.497215	0.402675	0.034335	0.0395683	4.07757	4.92432	1.28221	1.5046
RchiOBHmChr4g0425901	2.17724	1.19999	1.19868	0.781147	0.278803	0.655891	0.955361	1.01311	1.08729	1.84443	1.90696	3.17471	1.63409	1.5432	0	0	0	0	0	0	0	0	0	0	0	0
RchiOBHmChr4g0421171	13.1858	31.4892	14.8253	7.05821	7.80747	7.3937	0.150366	0.18603	0	0.0816461	0.815035	0.80905	388.425	394.864	1.35365	1.55401	62.7762	122.56	392.711	454.947	136.853	120.673	19.5826	27.2183	681.358	672.073
RchiOBHmChr1g0363391	11.7511	13.607	11.2293	4.64538	4.08593	5.01793	0	0	0.260602	0.0299976	3.05441	3.72918	0.212614	0.140551	0.322602	0.21411	0.505065	1.1675	2.0471	1.84129	1.18475	0.365713	4.30168	3.48935	0	0
RchiOBHmChr3g0462411	58.7628	59.7247	55.8407	21.0984	21.3648	23.0365	0	0.0428578	0	0	19.9035	22.0279	0.444392	0.599292	0	0	0	0	0	0	0.424506	0.0458633	0	0	0	0.063417
RchiOBHmChr1g0326431	2.28188	2.48869	2.02035	0.952967	0.841043	0.743615	23.8013	27.0187	26.5216	27.7236	37.3488	35.2794	13.2117	10.5146	2.39967	1.87218	17.2688	15.8329	4.76925	4.13924	32.5789	29.9794	37.2626	31.4598	87.1595	88.2503
RchiOBHmChr5g0001831	23.3647	9.67954	12.5758	6.80442	5.03489	5.29064	26.3847	26.0418	88.0756	85.0325	182.287	183.708	1.56266	1.68588	591.242	548.008	3.08389	3.77556	0.73693	1.31298	36.5719	37.867	152.899	161.234	203.607	207.122
RchiOBHmChr2g0090341	14.1525	15.5833	12.5055	4.95231	5.19465	5.79423	0	0.176788	0.269623	0.46554	4.80218	5.03252	0.0916558	0	1.14733	0	3.11519	3.14561	1.29671	1.41863	8.09877	7.66204	0.492321	1.47152	5.64011	7.58626
RchiOBHmChr5g0018011	3.72005	6.58316	3.45167	1.83332	2.1489	1.14489	0.964274	0.51462	1.12972	0.766555	0.819874	1.12213	3.34718	3.24529	6.14599	9.67255	138.619	140.802	337.584	346.454	5.23246	2.8203	52.6171	62.7211	105.257	102.916
RchiOBHmChr6g0295151	15.515	13.3806	16.559	5.32172	5.07289	6.78501	395.792	403.216	201.207	193.665	114.22	109.127	26.3789	27.0368	105.996	176.501	341.426	340.122	263.111	271.848	16.5388	13.7326	175.715	164.574	250.243	249.961
RchiOBHmChr1g0370711	6.42755	5.33427	5.86216	2.21867	1.9037	2.56372	25.7748	25.4531	36.7597	34.9504	48.1806	45.5688	14.7153	13.2329	0	0	0	0	0	0	0	0	0	0	0	0
RchiOBHmChr1g0359731	17.3638	17.0142	17.0574	7.12859	6.63943	5.50472	0.925609	1.08153	2.42567	1.73114	21.4064	17.1543	18.0749	17.5305	0	0	0	0	0	0	0	0	0	0	0	0
RchiOBHmChr3g0465561	5.11285	4.09972	5.74494	2.63057	1.17017	1.81688	1.1762	1.33968	1.91988	2.18968	7.95407	7.34225	1.19751	1.31094	0	0	0	0	0	0	0	0	0	0	0	0
RchiOBHmChr2g0156921	0.735809	4.07874	1.64065	1.00628	0.670694	0.748107	0.0553145	0.0456228	0.869751	1.1213	40.776	42.0639	2.36531	1.76376	0	0.686002	0	0	0.22309	0	7096.47	7107.39	7.26729	17.6709	0.0632831	0.540067
RchiOBHmChr2g0134771	2.82887	4.88865	2.51917	1.20897	1.41977	1.22468	2.52262	2.59017	2.7037	3.01902	0.799945	0.738671	3.30215	3.80703	7.716	10.8008	43.0348	44.8179	18.7909	23.9001	0.972601	1.43135	14.3316	16.0932	46.3237	46.1181
RchiOBHmChr5g0062431	5.12639	9.30747	5.28975	2.56114	2.7233	2.13622	1.0489	1.1255	4.09275	4.38672	1.43515	1.25526	3.67527	2.9915	3.48864	3.98881	23.8142	22.3575	24.9201	24.235	37.8223	36.3307	26.8708	28.5802	110.04	121.389
RchiOBHmChr5g0026101	9.23692	21.1082	11.1953	4.81044	5.97823	4.89101	21.8294	22.9076	6.02357	5.78603	1.52752	2.02461	212.307	206.013	75.9807	59.1827	25.8255	27.2959	9.62321	11.0849	8.36371	6.41271	22.4224	25.6651	1.51129	1.93464
RchiOBHmChr7g0236481	3.73178	5.96162	5.43846	1.93883	1.72492	2.0533	0.247686	0.374529	0.908728	0.328752	0.328177	0.403844	0.176522	0.336074	0.321407	0.0426634	4.18038	2.52022	2.66386	3.47378	2.52935	1.82179	2.35147	2.41839	4.81725	2.56945
RchiOBHmChr2g0098121	4.82553	5.77038	5.52287	1.7141	2.57055	1.79681	6.04103	5.53619	7.51012	7.13582	10.9531	10.5985	9.27539	9.25135	0	0	0	0	0	0	0	0	0	0	0	0
RchiOBHmChr5g0005301	13.4677	13.2901	13.7187	5.21466	5.24449	4.83276	2.54236	2.30964	6.32655	7.36246	210.103	202.504	80.9843	74.3667	0	0	0.207292	0.173035	0.037151	0	7.93922	7.41485	6.2965	7.08277	0	0
RchiOBHmChr3g0454321	6.29563	7.76403	7.5709	2.8838	2.49263	2.80082	1.17738	2.00692	2.07344	2.84132	20.1382	20.579	24.2333	22.9512	2.75007	2.19026	2.42874	3.04105	0.474853	0.371071	20.8404	16.6963	12.0431	12.861	1.34699	3.35284
RchiOBHmChr1g0357671	3.1375	3.79352	2.8108	1.59228	0.986155	1.07661	7.02494	7.11715	9.01062	7.64887	4.83716	4.76195	16.1787	15.2359	15.7194	31.6704	58.2453	41.7575	26.1574	21.0245	8.36002	6.78629	20.1248	19.9494	108.151	99.7099
RchiOBHmChr1g0350201	25.9716	25.6716	24.8196	9.54336	10.0717	9.31413	214.875	210.804	195.63	201.968	273.843	282.187	144.533	140.758	0	0	0	0	0	0	0	0	0	0	0	0
RchiOBHmChr4g0423331	21.2618	27.1683	18.536	10.0142	8.23069	7.0333	16.2481	16.7244	46.8561	46.7575	9.09726	8.36408	19.9202	18.5625	19.8369	38.0614	142.535	143.41	105.08	100.616	34.0588	29.7629	160.215	172.727	315.527	337.977
RchiOBHmChr3g0481981	0.905322	1.40154	0.702848	0.432669	0.367166	0.332551	9.12085	7.74004	7.72467	8.55805	3.56954	3.37153	3.18209	2.70299	64.7004	29.1296	66.7811	64.9841	43.7575	33.8724	14.0216	15.6938	33.7006	39.2128	21.0203	22.0219
RchiOBHmChr1g0350321	5.64115	11.33	7.54642	3.17552	3.47977	2.60748	6.06364	9.2219	9.30283	9.38888	11.2216	11.1552	55.0649	56.0467	29.8136	20.4664	6.73725	7.40702	8.79971	6.79364	34.2536	30.039	19.1281	20.6297	28.1095	28.8742
RchiOBHmChr5g0017431	19.4355	28.7267	25.2839	9.37866	10.8417	7.47687	6.35496	5.86613	1.05619	0.405256	0.190376	0.150323	11.8554	11.2811	0.22432	0.884778	24.3907	30.6558	31.1747	27.8638	2.11837	2.38313	3.69073	2.83321	0.52739	0.40186
RchiOBHmChr6g0244061	8.87532	21.6338	9.27282	4.12682	6.22644	4.72118	45.4247	44.8499	30.6105	29.8849	6.42684	12.8142	38.283	54.7048	13.4497	11.7365	209.413	192.794	340.78	326.435	8.71295	6.364	78.8308	72.1605	165.117	128.916
RchiOBHmChr3g0456481	20.959	30.2227	26.9394	9.56294	8.73745	11.3577	1.78334	3.46707	8.01164	5.80994	59.655	61.892	1065.65	1045.32	4.09106	1.71141	10.2718	14.3569	4.10996	3.25186	107.056	100.513	5.26642	7.11265	6.55794	10.2605
RchiOBHmChr2g0170361	2.80642	2.987	2.21017	1.06435	1.15665	0.793641	2.00269	1.68639	1.58933	1.66246	1.32613	1.15569	3.43446	3.91243	1.31639	1.1595	7.07873	9.74968	6.19527	5.85908	6.11398	6.33017	5.48139	5.16367	7.53337	8.76577
RchiOBHmChr6g0311161	8.23186	9.24937	7.42442	3.43107	2.66877	3.36282	14.9308	12.9176	46.855	46.8287	68.0642	68.47	50.764	51.6743	13.4641	9.01028	18.0628	11.3389	12.9489	11.0567	125.283	124.918	78.4688	79.3268	103.028	103.981
RchiOBHmChr5g0007051	2.00817	1.29426	1.74182	0.701089	0.746764	0.448607	2.31706	2.63598	2.96488	1.56181	8.14188	5.8362	3.55322	4.77008	0	0	0	0	0	0	0	0	0	0	0	0
RchiOBHmChr3g0482021	4.97205	5.34053	5.11676	2.04862	2.11576	1.67987	61.3695	62.3019	76.542	76.3916	102.85	89.9453	45.9096	40.9742	0	0	0	0	0	0	0	0	0	0	0	0
RchiOBHmChr5g0049981	1.98165	2.71434	1.40271	1.15486	0.792727	0.32969	4.4719	5.58844	23.5022	20.6026	5.23959	5.30276	6.46103	6.73425	1.7145	2.41587	71.9496	59.9001	109.478	104.712	38.8166	34.0282	81.7043	85.0317	197.475	191.351
RchiOBHmChr2g0146061	29.8475	29.4111	24.898	10.8334	11.6074	9.58598	1.55185	1.2163	2.4266	2.42081	13.9356	13.5543	22.21	22.9176	18.1737	16.2154	45.8797	58.8959	57.0208	59.534	82.3798	87.8353	15.4864	17.4385	13.703	14.1889
RchiOBHmChr1g0363161	46.0945	53.0546	49.0655	18.7651	19.6269	18.0745	43.5607	42.9799	39.0756	41.467	60.8599	63.0624	83.3451	84.1213	23.4051	26.1552	41.4104	42.367	40.2723	35.8058	39.6631	37.1517	55.8516	51.541	30.3337	28.4862
RchiOBHmChr4g0435971	97.1717	189.137	122.761	51.1122	53.7695	51.1998	39.4915	39.8518	21.5999	21.6685	37.1278	37.084	1974.28	1919.93	2337.33	1344.93	58.9922	53.605	41.1306	47.7706	264.618	277.053	92.3704	115.802	7.31434	3.93588
RchiOBHmChr1g0379521	169.889	218.09	171.352	74.4585	72.7384	66.2029	98.2348	97.3834	179.71	184.98	357.231	368.142	218.352	206.215	48.0783	53.0075	231.427	352.65	150.001	153.522	925.805	880.889	202.896	215.551	30.9063	37.9269
RchiOBHmChr4g0428361	4.55073	8.09136	4.72078	2.61994	2.48585	1.49334	57.3806	52.5314	33.7157	32.4055	15.1303	17.923	36.2123	39.4487	52.1139	50.2209	116.066	156.267	293.263	258.609	42.9387	31.4389	358.518	389.641	202.81	222.037
RchiOBHmChr4g0432151	2.45804	1.57744	2.41414	0.997962	0.840192	0.599789	1.24709	0.38572	1.40531	1.39192	11.6041	10.4039	14.0872	14.7355	0.252855	0.161107	7.89303	14.8854	15.9273	14.7882	4.29812	3.30216	1.57543	2.42579	0	0
RchiOBHmChr4g0423401	89.1115	76.4221	86.1513	31.6789	31.2807	33.1984	381.077	396.788	578.36	580.814	1345.18	1351.34	656.284	653.344	372.936	311.338	476.774	465.969	637.877	699.775	1400.57	1343.97	617.734	642.933	598.111	586.523
RchiOBHmChr3g0472451	1.382	1.90135	1.07053	0.586907	0.516337	0.562038	3.63346	2.67285	9.88221	8.74477	15.4718	21.2632	7.05467	9.06067	972.069	584.075	401.924	325.933	547.354	543.448	407.448	400.701	25.8037	22.0232	870.7	806.349
RchiOBHmChr6g0302251	44.5222	80.7295	50.2961	22.9004	19.5993	24.7507	0.269706	0.454572	0.54577	0.449949	0.635607	0.856549	67.5728	69.1488	7.13276	7.99855	1.82521	2.12015	4.00815	4.73425	10.3223	9.88425	10.4288	9.71418	30.051	27.0914
RchiOBHmChr1g0316801	39.4023	27.2998	27.9692	9.08185	12.0019	15.5292	0	0	0	0	35.4612	30.7824	0	0	0	0	0	0	0	0	0	0.109918	0	0	0	0
RchiOBHmChr5g0008501	3.36097	2.42059	2.92808	1.08035	1.13765	1.13905	1.55524	1.92411	17.444	17.3116	49.3151	48.0105	1.1084	1.23097	0.126134	0.0669717	0.182284	0.0760799	0.0653383	0	16.279	5.54799	5.23921	2.25406	1.4086	1.34448
RchiOBHmChr6g0257461	1.53448	6.23879	2.21116	1.68631	0.620109	1.53784	0	0.0766083	0.408928	0.268979	39.6722	47.1892	4.68666	3.15069	0	1.82386	0.174183	0	0.561909	0	14424.9	14915.1	18.2618	35.9641	0	1.02022
RchiOBHmChr7g0183861	7.50746	10.2532	9.38717	2.95515	4.14497	3.37456	0.752347	0.861843	0.771121	1.03893	0.825665	1.15398	21.2211	23.4222	0.596612	0.460765	1.09735	1.145	0.0140477	0.250287	12.3353	11.2273	1.58724	1.6069	0.0956366	0.153033
RchiOBHmChr2g0096531	24.0848	24.476	21.0382	9.37229	9.03339	8.40237	15.5413	15.253	20.6551	21.1516	14.7614	13.0237	3.69407	3.76979	15.252	21.8045	52.2039	51.9352	150.878	141.566	28.3499	25.7676	49.3567	43.6515	145.966	151.977
RchiOBHmChr6g0245601	139.2	148.051	140.573	54.7954	54.547	55.8982	252.262	247.977	255.579	241.993	730.364	735.431	563.474	550.846	70.844	65.5124	67.9122	68.95	51.9408	52.1939	845.873	866.288	272.987	224.902	39.8776	44.2219
RchiOBHmChr5g0027451	7.74763	5.99113	10.3416	3.21649	2.29602	3.84854	0.0624419	0.0515013	0	0.0452065	0.0451275	0	3.73812	4.32095	0	0	0	0	0	0	8.28945	6.99936	0.401579	0.342943	0	0
RchiOBHmChr7g0232341	277.979	481.885	309.538	134.492	154.538	124.214	90.1592	88.6019	70.9756	67.093	102.017	104.573	6411.01	6266.04	717.48	581.63	191.466	151.127	1.33391	1.00068	995.812	1018.74	760.211	782.661	211.895	227.658
RchiOBHmChr6g0280881	73.7738	54.4828	58.9645	22.3414	26.2784	23.8184	3.35352	2.60492	3.12046	2.76046	40.5129	42.1471	52.2822	51.5486	3.71084	5.49547	2.81061	3.41133	1.56327	1.922	109.962	108.118	12.8201	11.5745	11.6413	12.2504
RchiOBHmChr6g0300331	1.20067	3.12677	1.97021	1.11955	0.789078	0.488295	0	0	0.0774607	0	0.801076	0.240968	16.1152	18.1313	0	0	0.11548	0	1.61432	2.67827	18.7395	21.1972	2.3762	2.81839	17.8944	10.6719
RchiOBHmChr3g0462251	11.6994	15.1269	13.6409	5.84898	4.70411	5.06319	11.258	12.7572	6.78304	6.31123	9.0903	8.52811	8.90382	9.29366	0	0	0	0	0	0	0	0	0	0	0	0
RchiOBHmChr1g0376471	3.8712	3.65014	5.3151	1.76853	1.63634	1.54722	0	0	0.0236831	0	0.21771	0.540278	0.0644067	0.229915	0	0	0	0	0	0	0	0	0	0	0	0
RchiOBHmChr2g0163911	4.45892	4.59372	4.66154	1.46585	1.42306	2.51083	0	0	0	0	0.559393	0.580526	0.562664	1.129	0	0	0	0.0454366	0	0	0.237126	0	0	0	0	0
RchiOBHmChr7g0223711	3.10608	5.46663	3.86876	0.970052	1.91501	1.96767	27.8352	20.6234	22.7738	22.543	16.1105	14.6153	18.6609	18.7241	37.9949	33.7651	23.6667	19.5248	20.8114	18.6235	12.7672	18.322	31.967	21.8087	7.2866	7.62917
RchiOBHmChr3g0465231	12.843	12.0219	9.7874	5.09032	4.39481	3.9173	37.9135	37.9301	27.1576	23.1279	52.5178	47.9652	18.3138	15.0042	97.3712	69.8404	33.5747	39.9785	30.9714	23.2343	38.3584	41.8295	26.4473	31.4914	44.3794	42.8439
RchiOBHmChr4g0422281	3.12179	3.93214	3.97757	1.94405	1.30362	0.979395	0.10064	0.12451	0.0316487	0.0364305	0.690971	0.492271	1.37711	1.29726	0.636648	0.416041	0.0471826	0.118156	0.30442	0.19031	9.14676	8.08333	0.832166	1.88851	10.3624	9.21193
RchiOBHmChr7g0228601	31.9532	36.8397	26.227	12.6227	12.1017	12.2263	27.6418	28.2327	28.9131	29.6594	52.0907	52.112	44.9496	43.2527	18.7059	23.8574	15.4674	14.3071	14.1851	16.6273	71.1758	68.514	22.2555	19.7703	2.15359	1.63235
RchiOBHmChr3g0455111	4.2946	3.42366	3.76989	1.71822	1.26779	1.48112	153.853	143.257	106.238	100.291	28.4811	31.1104	20.0857	18.9492	10.7829	12.2048	38.1335	43.6191	120.141	144.025	80.6907	81.9221	45.2888	47.9156	1691.86	1306.04
RchiOBHmChr4g0445101	95.0331	98.3488	97.1206	38.0914	39.1136	35.7505	0	0.0247456	2.79275	2.97578	73.0069	71.244	3.64353	3.52131	0.175195	0.248057	0.928348	1.0215	0.181505	0.113469	3.98295	2.80698	1.73657	1.37316	5.83516	4.83335
RchiOBHmChr1g0379531	105.978	143.21	113.191	50.9515	46.1157	44.0768	78.8667	75.8263	147.552	143.245	257.546	256.678	139.236	127.557	31.7196	32.5713	209.596	279.223	122.612	109.745	757.182	735.994	160.313	173.514	18.6436	24.2039
RchiOBHmChr2g0105601	2.93729	4.87462	3.3357	1.28805	1.8304	1.21533	6.73937	5.84361	22.1899	23.7285	13.8417	16.6046	37.316	35.5418	47.9588	41.9987	463.65	518.358	381.575	394.197	336.58	355.097	93.8559	119.294	984.274	996.917
RchiOBHmChr2g0106631	2.80315	4.24283	2.97632	1.34567	1.37591	1.17123	0.043327	0.0536034	0.109002	0.0470517	0.0469695	0.127158	0.0370542	0.176365	0.0843343	0.0671669	0.0406257	0.101736	0.174743	0.0819313	2.78744	4.24483	0.11942	0.158641	0.0991374	0.158635
RchiOBHmChr4g0396081	11.4397	14.2841	10.1685	4.47686	5.14547	4.38498	1.16219	1.00955	4.11358	3.60727	8.30099	9.11976	37.4309	38.5171	22.4049	25.1338	12.0797	17.5057	19.0233	22.164	12.9792	14.4373	41.654	50.0792	34.5699	37.2704
RchiOBHmChr4g0427041	3.00642	3.26826	2.2801	0.967807	1.28857	1.09564	17.0156	17.5156	26.5475	25.5928	10.8675	12.6458	1.46649	1.52128	1.79722	2.04482	24.1176	31.7465	0	0	0.808194	0.232844	33.084	37.7918	19.4669	20.6056
RchiOBHmChr2g0159931	34.8432	36.4825	36.6143	14.7885	14.8468	12.4903	17.0566	19.7789	29.4216	27.0201	116.191	113.003	221.118	218.601	96.3126	89.3605	34.6782	27.3611	175.554	168.136	391.991	386.353	65.4757	78.9926	100.08	112.533
RchiOBHmChr2g0114521	23.2386	42.9542	19.6148	10.9026	11.1982	11.5377	0.206788	0.307002	1.04047	1.07791	1.25537	1.8881	48.2092	45.5664	2.41503	4.44523	27.378	20.0535	31.1083	28.6629	4.68797	3.79636	15.0469	15.3322	185.43	178.226
RchiOBHmChr1g0329711	9.18143	11.3451	10.7931	4.62454	3.09197	4.60076	3.23739	6.10323	3.54873	4.62063	7.01911	4.5244	1.10748	1.88257	0	0	0	0	0	0	0	0	0	0	0	0
RchiOBHmChr1g0377541	53.4137	37.4506	46.8737	19.2803	15.4362	19.5068	699.625	680.388	652.666	668.68	450.846	453.671	28.0988	24.4255	126.477	195.847	2113.4	1911.38	2083.3	2244.38	126.193	116.302	303.801	292.303	16.2786	19.3125
RchiOBHmChr2g0088211	292.255	209.293	251.872	102.161	98.3033	96.3474	72.4482	68.0831	121.66	123.316	807.523	797.375	143.879	146.871	256.121	129.959	228.849	230.846	100.471	91.6933	1066.85	1052.76	399.196	382.858	84.4109	99.9293
RchiOBHmChr4g0443271	2.62327	2.6533	2.69828	0.966949	1.03581	1.16019	10.8686	12.0744	6.81256	7.65452	2.83203	2.98965	1.64403	1.50481	19.8961	7.71762	2.80772	1.77949	3.16831	2.23701	3.51088	4.69859	6.72495	7.27546	3.84872	2.52658
RchiOBHmChr6g0290041	3.92596	4.84107	4.06764	1.78608	2.03009	1.19747	52.5142	55.2905	42.8363	50.7827	75.247	73.1113	30.9796	29.4105	120.209	23.3152	8.59189	8.61897	8.64475	8.56247	2.40774	4.30398	10.5849	12.1156	27.097	40.4818
RchiOBHmChr7g0209741	31.662	44.0997	41.7893	16.6438	15.3903	14.3049	0	0	0	0	1.41099	1.65339	18.4165	19.5121	0	0.120461	0	0	0.235047	0	250.703	244.386	5.62211	7.14847	0.300036	0.0355633
RchiOBHmChr6g0281291	2.23041	2.42495	1.16368	0.887469	0.634568	0.774143	3.21088	3.22985	4.5643	5.30104	1.34842	1.30881	0.315421	0.654976	4.18064	9.95521	57.1319	46.3191	35.6122	37.3332	2.65858	1.9819	53.1597	58.6635	367.158	358.257
RchiOBHmChr6g0312171	1.05319	3.52635	1.50386	0.993328	0.479425	0.930485	0	0	0	0	14.3929	12.7478	0.210269	0.389203	0	0.211749	0.0384226	0	0.537119	0.232465	3628.24	3655.71	5.7978	8.17706	0.0468807	0.850184
RchiOBHmChr2g0117531	1.99634	1.6303	1.49927	0.728318	0.642778	0.653466	0.0274529	0	0	0.0198753	1.52772	1.03846	0.0234783	0.204873	0.026718	0	0	0	0	0	328.538	322.463	0.403557	0.829273	0.0628155	0.134019
RchiOBHmChr2g0135471	15.4937	16.6975	13.9266	6.34122	6.10663	5.75095	8.8797	10.0322	10.2971	8.70553	14.4727	12.9398	39.9878	42.0127	42.2197	76.8579	202.905	235.38	178.039	172.769	48.0313	50.8212	76.9932	81.2819	36.4027	41.2039
RchiOBHmChr3g0492661	5.42149	6.39432	4.49954	1.8212	2.18772	2.48406	15.5027	17.1514	6.4218	7.43078	9.27225	9.02984	12.801	11.0252	48.0724	87.3465	21.3029	20.1464	25.7104	24.0084	3.60295	2.17042	31.3347	30.3386	3.66951	1.82677
RchiOBHmChr7g0241761	0.677067	1.84072	0.866358	0.363551	0.441991	0.540116	31.7964	32.4886	4.37559	4.64653	0.601932	0.671003	14.2878	13.262	1.62116	2.27851	27.2873	28.7599	13.0412	13.1093	6.10379	5.7945	36.5049	30.8992	19.3936	19.7915
RchiOBHmChr5g0037811	0.858625	2.16973	0.395629	0.636968	0.336072	0.375544	0.146175	0.120564	0	0	14.4731	15.4679	6.46939	6.29725	0	0.0755352	0.0342654	0	0.147386	0	3749.92	3902.11	3.39104	7.9279	0	0.758197
RchiOBHmChr3g0466961	9.19732	12.7321	10.5199	4.31864	4.6154	3.90095	1.13461	1.81658	0.335817	0.579834	1.20588	1.04467	37.7863	37.9441	4.74172	6.06996	0.250322	1.09701	0.538356	1.26209	11.1094	7.42244	2.75935	2.99357	2.74884	3.17674
RchiOBHmChr3g0449161	2.46956	3.2156	2.67674	1.05541	1.16432	1.09849	0.0870771	0.1197	0.25558	0.378251	5.6219	5.4519	5.11363	5.35618	11.017	9.11931	0.353808	0.443007	1.31697	1.53685	2.16378	1.30657	0.666684	0.504815	1.06263	2.72767
RchiOBHmChr7g0178621	74.3277	62.8859	59.0175	28.0958	24.243	25.6358	123.609	123.981	127.004	121.913	447.249	458.221	33.2339	34.8109	38.1128	42.4443	69.673	74.1525	112.989	99.213	1006.95	1001.05	188.476	196.055	16.3128	20.7108
RchiOBHmChr1g0352551	1.68689	1.90486	1.7911	0.52585	0.767245	0.871667	12.8916	11.0759	11.571	10.4027	7.13328	7.61952	4.24929	2.64203	138.208	94.7899	80.5227	85.7668	71.288	84.4343	13.2334	15.2899	55.8897	70.9878	57.1515	55.3132
RchiOBHmChr1g0320841	1.04223	1.13764	1.08229	0.362205	0.518375	0.4192	3.61837	3.99695	3.27549	3.54584	2.41891	2.85711	2.4093	2.62138	0	0	0	0	0	0	0	0	0	0	0	0
RchiOBHmChr2g0127061	6.38049	6.09159	5.38707	2.69397	2.39206	1.96959	0.0433692	0.107311	0	0	4.0433	3.45075	2.63341	2.26556	0	0.089643	0	0	0.437283	0.0410055	0.620034	0.114837	0.0398454	0.119096	0	0
RchiOBHmChr3g0467811	2.24718	3.28434	3.80624	1.2119	1.0847	1.43612	4.52471	4.13	3.85134	3.7344	6.21313	6.7872	10.6544	9.90486	0	0	0	0	0	0	0	0	0	0	0	0
RchiOBHmChr6g0279531	211.768	300.067	280.188	109.227	93.843	112.566	31.9218	30.8884	134.988	135.242	139.646	127.88	337.364	314.202	43.8239	64.5993	72.9058	83.1206	41.7161	30.5193	1779.97	1761.18	120.262	114.269	37.1325	38.7412
RchiOBHmChr3g0466461	1931.45	1281.47	1418.72	604.401	638.797	603.15	1489.18	1450.94	2426.36	2394.63	9657	9932.63	3262.88	3434.75	191.894	495.506	303.72	429.177	102.091	99.3348	1848.35	1656.67	955.588	1057.49	49.0891	77.3416
RchiOBHmChr1g0357141	7.49652	7.32089	14.261	3.20378	5.30156	3.04873	0	0	2.09754	0.889536	15.0957	11.6765	37.5283	47.0371	0	0	0	0	0	0	0	0	0	0	0	0
RchiOBHmChr7g0214801	2.87554	3.15202	1.93549	0.658346	1.08942	1.47224	0.738713	0.800429	0.245972	0.356541	0.596686	1.01079	1.7838	1.82777	0.789421	1.30236	2.85211	4.69352	0.0876271	0.328684	0.798741	0.920485	1.22431	0.636418	11.7324	14.3542
RchiOBHmChr3g0494731	453.956	370.103	435.256	164.201	166.246	172.771	809.342	820.057	3433.48	3513.75	16568.8	16373.1	5566.8	5372.13	264.654	454.089	2595.64	2962.58	2802.39	3058.3	4323.63	3963.02	3546.74	3555.94	172.581	168.336
RchiOBHmChr1g0364201	14.2225	15.5699	20.0385	6.78717	5.33359	7.86325	9.85627	11.2443	2.02774	1.26709	0.133145	0.360456	20.4824	15.0608	0.71719	0.951994	1.12283	0.432586	0.74302	0.261283	4.5152	3.57734	1.26946	3.20411	3.68846	8.76884
RchiOBHmChr7g0199881	5.69965	6.0881	5.82899	2.51057	1.48373	3.11432	0.650998	1.18777	0.471482	0.214231	0.0285142	0.0128658	0.253067	0.120451	0.364783	0.163103	7.71336	7.15663	0	0.0186521	0.42305	0.313413	1.26871	0.523672	0.24826	0.192608
RchiOBHmChr2g0130261	5.48578	4.70967	3.95099	2.22968	1.55544	1.87216	0.0649274	0.178505	0	0.0156687	4.77059	5.37779	0.0185091	0.088097	0	0	0	0	0	0	0	0	0	0	0	0
RchiOBHmChr7g0241971	8.20476	5.15238	8.266	3.08496	2.67119	2.91859	60.7344	61.394	45.9681	44.9725	33.2985	31.7391	0.607146	0.55388	1.86549	7.74056	1.3979	1.25023	0.93055	1.34247	10.1134	8.17718	36.7541	36.3913	0.36549	0.389893
RchiOBHmChr2g0118741	1.51545	1.87757	0.930011	0.665481	0.629273	0.424068	1.60796	1.46208	1.84998	1.93642	0.833303	0.659906	2.13988	1.97955	1.19849	1.67801	0.338314	0.690662	1.32074	1.61673	1.22551	0.740768	0.490034	0.868762	0.0538418	0.0382912
RchiOBHmChr2g0118751	2.75241	2.93899	2.30423	1.19891	1.16042	0.823378	1.38857	1.34847	0.539968	0.637766	2.66531	2.56102	2.58576	2.1981	6.36464	6.0026	3.07299	3.55848	7.00034	8.03969	3.12568	2.5039	2.96988	3.12979	0.666189	0.601336
RchiOBHmChr2g0112841	1.0148	0.593269	1.43666	0.440579	0.334154	0.452011	6.37946	6.91067	1.49749	1.94744	1.95717	1.62986	0.00777187	0.0801481	6.1733	8.55599	8.61469	7.75649	2.66638	3.29943	0.148482	0.0721884	7.48087	7.81934	0.374281	0.310544
RchiOBHmChr6g0306431	28.3283	16.1153	17.278	7.83599	5.92154	11.1852	10.758	9.47027	24.2022	23.9647	70.9835	71.7137	0.265398	0.385978	1.1074	1.22942	29.7767	32.1223	1.40803	1.85828	19.7536	17.6667	10.5491	12.262	1.77516	0.757473
RchiOBHmChr6g0298701	10.4628	14.9899	10.4725	4.53554	6.13431	3.74911	23.2037	24.5704	66.0232	68.0027	132.619	135.075	188.738	191.241	1.87366	1.57079	53.2049	61.0271	82.1409	78.4633	681.164	741.493	112.643	130.964	8.92608	15.0869
RchiOBHmChr4g0415821	14.5971	35.673	19.1331	8.94881	10.5842	8.35196	0.0283971	0.0234216	0	0.0205589	0	0.0185202	63.2647	65.4445	0.994929	1.70219	1.3047	0.63345	18.1529	21.5601	0.956963	0.275706	25.829	28.3332	1.10459	1.00506
RchiOBHmChr1g0368001	3.92379	7.34654	5.50948	2.60155	2.26488	1.85674	3.82558	3.30879	2.05493	2.45524	0.179338	0.18881	15.2268	18.1255	17.2674	8.61263	15.0463	17.043	9.40337	11.4769	61.556	67.4401	19.3026	23.3202	1.30118	3.02849
RchiOBHmChr5g0027901	2.67995	6.62042	2.96696	2.36049	1.07861	1.49529	0.359544	0.509454	1.10168	0.994487	0.379777	0.23449	7.01709	7.22392	101.225	56.9001	38.7783	34.5814	10.8757	12.9181	16.5223	20.131	24.597	30.1098	48.401	52.6341
RchiOBHmChr4g0415371	3.86624	4.74654	4.92609	2.18104	1.45825	1.79247	0.218119	0.395784	0.0823114	0.505322	0.409857	0.284509	17.9078	17.0766	1.27368	1.57796	0.899886	1.5877	0.615791	1.44362	0.846415	0.269525	1.12222	1.59727	3.89284	4.09952
RchiOBHmChr4g0444161	18.6638	23.1853	17.6297	7.5791	8.90596	7.44726	387.128	386.527	351.312	366.078	252.603	240.216	525.362	539.937	272.181	241.726	722.951	770.161	736.83	723.048	180.028	178.28	828.993	802.81	460.418	484.514
RchiOBHmChr5g0026721	65.801	63.3735	74.5464	26.5138	26.5803	29.1616	47.729	51.9996	37.3303	34.9012	111.39	108.77	53.6844	52.1894	11.4464	9.39904	3.97521	4.25487	8.82507	8.46953	27.7219	33.3757	41.2752	36.554	25.8942	22.449
RchiOBHmChr5g0068331	61.5521	64.9546	61.172	27.1083	22.6673	25.9525	20.3087	21.6007	15.1386	11.9308	103.582	103.999	9.41524	10.3915	34.539	34.416	14.2979	16.7786	18.8222	28.7705	26.884	14.5453	29.7785	28.7299	108.505	112.245
RchiOBHmChr3g0462401	34.4472	39.3882	34.2444	17.6082	14.0912	11.743	0	0	0.119832	0	24.751	19.8816	2.32195	2.10046	0	0	0	0	0	0	0.680978	0.0840827	0	0	0.0544938	0
RchiOBHmChr1g0324421	37.8476	37.0708	30.7662	15.8126	13.5329	13.4096	0.615416	1.12797	8.38642	9.60402	104.224	108.057	134.386	130.126	7.45349	12.2965	0.320581	0	0.275784	1.0991	256.341	262.901	168.933	198.105	1170.01	1105.18
RchiOBHmChr3g0458081	64.2288	103.972	79.4163	33.5238	34.2476	32.5473	3.19759	3.84297	5.91844	4.96067	18.4875	20.1392	770.624	771.351	29.6972	20.3945	30.8389	23.1682	28.556	21.336	542.887	625.58	72.7731	100.604	1087.23	1051.66
RchiOBHmChr0c28g0500931	3.01329	4.39369	3.45745	1.9109	1.42067	1.00804	0.137096	0.158305	1.31064	0.774182	0.217978	0.679531	0.257944	0.204621	0	0.396723	4.24208	7.21084	3.04108	2.9295	0.672003	0.193607	8.06122	3.41341	5.14453	4.55105
RchiOBHmChr4g0391471	9.06777	8.49482	7.93182	4.13631	2.79104	3.38201	1.91072	2.36391	0.267055	0.384255	16.5708	12.6692	0	0.0720158	0	0	0.398132	0.498504	0	0	0.433602	0	0.0975264	1.06884	0	0
RchiOBHmChr5g0021661	5.68405	4.4435	4.65268	2.11885	1.84166	2.04685	4.57701	4.89361	5.49087	4.90912	19.9697	22.8302	8.11868	10.4656	8.41403	7.79621	18.4382	12.7375	15.8958	10.4983	29.7751	27.0069	14.3286	12.0258	7.75759	10.8617
RchiOBHmChr4g0428311	1.42034	2.17966	1.59186	0.775619	0.78125	0.529494	7.47141	6.76847	5.16135	7.18262	4.33745	3.11537	5.23747	7.72785	17.6421	19.2407	138.504	136.897	267.864	300.519	822.01	800.203	18.5675	17.2659	35.5922	35.1285
RchiOBHmChr2g0153701	9.32033	15.3104	6.27217	3.7588	4.02289	4.80478	3.36968	2.5044	15.2314	15.2808	2.56912	2.00446	4.78193	5.32582	0.756802	3.17637	83.7118	62.9941	43.0486	36.5168	21.5919	16.0475	36.3342	40.8442	174.158	172.183
RchiOBHmChr7g0231911	0.855847	1.34799	1.21445	0.485403	0.550576	0.341555	66.3701	74.794	24.6647	24.5967	2.60142	2.30637	34.1323	35.9875	16.6554	16.1855	33.5733	37.4408	29.162	26.5102	9.73763	6.24261	55.3497	57.4581	56.1357	63.5061
RchiOBHmChr7g0198701	12.2792	9.79993	7.86635	3.98711	3.10485	5.18906	0.038701	0.159601	0	0	14.2366	14.2103	1.29082	1.73288	0	0	0	0.0454366	0	0	0	0	0	0	0	0
RchiOBHmChr6g0273301	2.37726	1.70851	2.61973	0.908211	0.73022	1.12061	17.3064	20.8531	29.9669	27.9978	35.5667	32.932	0.121817	0.241587	5.54505	3.31221	2.87151	1.6723	3.51866	4.04029	0.509102	0	3.33709	3.45518	0.977754	2.08607
RchiOBHmChr6g0290031	1.48705	1.7387	1.50372	0.605253	0.667709	0.662356	13.3165	10.2364	8.9449	9.37087	13.6468	13.5657	8.19974	8.45605	29.4191	6.71605	2.42232	1.15692	1.79918	1.41016	0.407959	0.352605	2.52031	2.53541	10.7863	14.0417
RchiOBHmChr1g0325051	2.98336	3.96601	3.30844	1.26933	1.48783	1.43977	12.371	13.161	3.34534	2.72584	1.90044	2.0268	2.35111	2.14889	3.54797	12.8471	1.68112	2.03478	2.04878	1.46916	179.061	181.087	3.78863	3.39174	0.273492	0.145876
RchiOBHmChr7g0238501	33.4781	27.2801	24.1986	11.325	10.3954	13.1215	0.72277	0.737322	84.4572	89.7682	314.746	310.504	3.62744	2.684	0	0	5.95669	7.9497	4.39171	3.77657	165.778	162.171	68.1345	76.2755	8.29068	6.40685
RchiOBHmChr4g0417651	0.554837	0.933629	0.543796	0.299136	0.193173	0.343673	2.16846	3.21934	1.93667	1.9153	4.63883	3.39418	5.41518	5.38437	5.57148	5.60269	10.9389	8.70685	9.35786	6.31485	8.14902	7.38783	7.01279	8.65432	9.6753	11.0623
RchiOBHmChr5g0037931	8.00626	8.93565	6.36035	3.44624	3.31305	2.74069	71.061	68.8872	112.653	113.535	45.8693	46.726	28.1387	32.0958	213.539	257.143	132.166	151.772	226.628	213.714	118.294	109.203	102.224	112.362	327.754	299.502
RchiOBHmChr1g0345811	2.84412	2.15397	3.18159	1.12867	1.00568	1.23928	9.25965	7.73154	8.34033	10.9247	6.8573	8.87215	7.43023	5.50644	0	0	0	0	0	0	0	0	0	0	0	0
RchiOBHmChr7g0180581	1.46757	2.61239	0.946772	0.65101	0.858322	0.543955	4.09119	4.19633	4.15663	4.21505	15.1629	15.7015	26.6902	27.8981	7.8102	13.4977	3.49185	4.0027	0	0.148778	11.4088	11.8052	6.36102	7.72995	21.1226	20.2924
RchiOBHmChr6g0261451	0.615405	0.686843	0.622307	0.267179	0.30396	0.214523	8.79329	11.7696	5.40925	5.64018	8.83571	8.55199	1.51724	1.51757	6.79376	4.82289	23.9396	26.4884	14.5824	10.502	5.15934	2.79131	14.8112	13.9094	18.4434	20.8516
RchiOBHmChr3g0461231	2.72262	5.10341	2.85375	1.37241	1.84316	1.14984	25.0117	23.9944	43.6231	50.9418	29.1442	27.8042	12.4905	13.6391	172.294	292.592	1363.5	1255.88	60.7517	58.3666	98.3627	111.111	1168.8	1201.63	7.03533	9.23701
RchiOBHmChr2g0097591	14.7624	18.7429	13.0731	6.5148	5.62723	7.05109	78.7878	86.2876	113.721	82.2306	39.5518	33.6152	79.5863	94.1807	289.955	216.852	31.2976	33.3721	29.136	19.8501	49.6234	47.9912	128.518	92.8488	89.868	96.0123
RchiOBHmChr1g0344521	103.833	163.691	104.259	50.4767	59.4213	43.1782	428.356	432.976	544.135	542.214	733.75	712.197	1422.85	1413.31	227.376	115.774	7.34493	6.97433	64.2211	60.6792	23.0314	22.768	6.56783	5.67731	13.4312	11.4525
RchiOBHmChr2g0105541	8.72895	9.0152	8.33939	3.64298	3.82585	3.24717	39.6298	40.9962	30.998	34.8305	38.107	38.4952	16.2281	17.5157	0	0	0	0	0	0	0	0	0	0	0	0
RchiOBHmChr6g0284551	93.125	121.638	115.626	45.7037	44.5868	45.8643	32.532	28.3834	55.5996	54.4177	252.784	248.334	1434	1417.62	158.78	137.294	123.452	116.054	164.077	167.363	833.522	816.712	171.909	181.797	308.189	286.002
RchiOBHmChr1g0367291	6.21853	4.08453	6.31835	2.23798	2.46892	2.14177	18.666	20.1581	39.4429	37.3329	55.9016	63.4084	25.7255	22.685	15.6831	9.71492	15.6135	11.5091	29.9233	27.1713	12.6163	11.8526	31.5844	30.6077	58.0733	56.3785
RchiOBHmChr4g0424231	20.4326	20.5817	18.9536	8.84785	7.44236	8.42965	59.2458	60.9815	55.244	53.5581	48.6925	50.3099	4.41316	4.10315	4.4011	9.5479	61.0929	64.9971	34.4908	29.7069	6.68616	4.1628	71.9559	68.7705	12.6643	13.4252
RchiOBHmChr7g0196671	1.53283	2.3523	2.64472	0.873443	0.742755	1.09091	1.42927	1.55528	0.747854	0.49564	1.06767	0.650154	4.78664	4.72604	1.55465	2.20949	0.754541	1.00117	1.9134	1.63527	45.6386	46.835	1.87591	2.74854	8.72546	8.85364
RchiOBHmChr7g0200521	62.2152	42.4923	59.9142	24.3731	17.9995	25.5895	49.7243	47.6768	30.0012	30.9299	38.7656	38.5378	1.98351	2.08459	46.9555	40.2902	29.199	29.831	8.6986	8.40839	5.14418	3.18144	42.4405	35.7124	10.0728	9.30301
RchiOBHmChr6g0311151	8.25299	9.31393	7.14733	3.6847	4.91269	1.57506	615.073	607.961	634.305	655.3	676.473	687.735	80.0638	79.457	197.573	69.841	4.90518	7.47102	4.95976	5.79521	1.03654	0.516866	3.9096	2.85886	6.11895	7.38514
RchiOBHmChr2g0159041	452.989	450.764	435.344	186.933	184.344	181.303	63.1846	61.8548	331.259	318	1300.01	1261.53	2435.19	2467.94	6.13015	21.3091	38.6662	34.1443	22.8733	24.706	1102.28	1104.38	594.343	600.893	6.98098	11.2907
RchiOBHmChr7g0212101	114.051	171.284	123.139	55.4699	62.8732	50.178	0.964547	0.707153	5.12283	5.58648	38.3787	39.9456	797.543	809.752	284.642	286.815	503.053	535.949	781.27	805.834	1096.84	1096.48	198.307	231.618	643.095	644.57
RchiOBHmChr7g0189511	37.1898	66.6071	55.6552	19.5731	26.3237	19.8882	2.37779	2.09736	0.373877	0.430366	0.596686	0.495382	1086.13	1066.18	104.168	147.069	0.557384	0.581588	0.865756	5.52682	55.0049	41.8867	2.54869	4.71585	49.0793	45.061
RchiOBHmChr5g0026421	0.579625	0.768967	0.510924	0.186953	0.257806	0.333573	5.35693	5.39566	2.28239	2.69872	0.48171	1.41681	4.26468	3.28258	31.5935	18.548	30.7163	34.2577	36.5894	30.74	2.11759	0.915133	46.4044	47.1374	2.1182	4.70002
RchiOBHmChr6g0298911	7.31721	5.7363	5.20445	2.97644	2.0034	2.57066	79.6304	82.3928	62.6044	63.0877	91.5802	101.302	66.2666	59.2802	218.922	88.5802	414.35	469.267	505.778	533.12	564.234	577.214	135.697	131.706	135.698	146.941
RchiOBHmChr5g0066721	1.81967	1.83749	2.39211	0.715951	0.78983	1.02195	0.0977708	0.0672002	0	0.0235946	0.0235534	0	6.99585	7.49533	1.66519	6.73633	14.7138	19.4564	8.31362	9.04394	0.0332809	0.0287651	0.598846	0.850214	3.46752	4.21612
RchiOBHmChr6g0268031	4.83797	3.51819	4.72518	2.14684	1.82794	1.41909	2.49165	2.57278	5.67036	6.89889	19.6983	20.7532	19.7476	19.6139	10.0515	9.003	3.03185	3.81854	4.04651	3.47084	12.2173	13.7325	9.08693	8.32223	7.79019	6.80147
RchiOBHmChr3g0466771	28.1222	26.885	24.7837	11.428	10.3886	11.3002	6.88979	6.76006	10.3496	9.36595	13.4762	13.0268	2.73893	2.20132	1.27135	1.11054	3.02268	3.38893	4.3763	4.70145	9.29499	8.25696	4.54908	7.03958	0.843675	0.591432
RchiOBHmChr7g0178021	27.17	27.814	24.3504	13.0086	10.1837	9.63522	279.178	283.779	390.484	387.906	370.159	349.008	130.727	126.568	385.603	472.01	187.744	214.201	0.802727	0.627287	2200.26	2177.52	1066.21	1227.34	31.1198	36.2745
RchiOBHmChr7g0193441	9.06473	11.8031	10.6119	5.1653	6.57497	1.13431	0	0	0.0412364	0	0.379071	1.069	0.168215	0.0889607	0	0	0	0	0	0	0	0	0	0	0	0
RchiOBHmChr5g0014501	10.4568	7.39778	9.10062	3.10137	4.0949	4.04348	0.128854	0.106277	10.0493	10.1683	117.523	108.408	9.5873	10.2279	0	0	0	0	0	0	7.23715	10.5769	18.8232	19.6974	0.589667	0
RchiOBHmChr1g0377161	48.0276	45.6147	37.9707	15.99	19.6181	19.1206	0.0139236	0.0344522	0.175145	0.171367	34.9682	34.8794	38.6885	40.1557	4.30919	6.11571	0.691943	0.719266	0.842337	0.829382	3.6542	1.75739	1.47112	1.80982	0.0637179	0
RchiOBHmChr1g0359751	36.0093	47.979	38.7357	15.5675	18.0392	17.4037	0.094058	0.38789	0.0887366	0.204288	18.0139	16.5014	263.925	262.871	0.04577	0	0.573259	0.386499	0.521603	0.889318	233.836	232.493	84.6443	79.7264	0.053804	0.114793
RchiOBHmChr4g0436941	6.41461	8.68497	6.55965	3.3144	3.02428	2.63011	122.942	130.453	94.6224	94.2473	56.7007	57.3354	70.563	62.3919	82.2719	63.2305	61.9818	73.0762	103.917	92.8841	26.903	24.9562	70.5736	62.8938	2.53927	7.89089
RchiOBHmChr2g0160381	13.3951	14.6037	14.1677	6.14459	4.92549	6.49925	16.1724	18.3139	13.0307	16.9615	16.1737	13.8542	15.9991	17.0805	0	0	0	0	0	0	0	0	0	0	0	0
RchiOBHmChr4g0418311	84.7465	49.6663	63.2436	30.5175	24.3825	27.2518	403.49	393.492	405.259	413.088	452.854	462.483	3.85034	3.97895	12.6475	17.0272	234.325	240.429	19.9245	19.5352	130.397	110.04	610.235	606.34	50.2266	56.2829
RchiOBHmChr6g0269371	11.9212	9.60321	11.4327	3.98539	4.4873	5.3369	27.2695	27.8467	28.5852	28.752	36.1314	31.4763	14.252	15.3436	0	0	0	0	0	0	0	0	0	0	0	0
RchiOBHmChr2g0166331	4.86963	3.99552	4.63924	2.12864	1.32091	2.211	804.478	802.932	865.241	878.028	488.278	504.488	12.6292	14.8043	196.079	151.644	2390.14	1920.9	571.108	575.211	109.498	98.7089	437.177	408.189	86.0864	88.5052
RchiOBHmChr1g0319331	65.2411	80.3698	87.0733	32.3491	27.1705	37.8089	2.76793	3.66904	1.58545	1.86078	24.2194	20.5987	506.242	510.538	28.141	24.111	8.20319	10.0972	3.33906	3.78542	831.925	799.928	21.0255	21.9434	19.9048	20.3893
RchiOBHmChr5g0004131	6.93655	5.87725	8.17483	2.73165	3.45871	2.56991	81.6001	82.9899	77.9482	71.3657	42.1239	41.081	12.0683	7.76978	66.2792	41.0039	55.6106	54.0237	41.8596	32.8721	16.0811	16.7872	65.1995	64.0235	30.4165	38.4377
RchiOBHmChr3g0497471	1.26246	1.53261	1.31694	0.586865	0.292385	0.864718	2.43523	3.18278	3.32248	3.47186	1.97659	1.09954	4.19737	5.31223	13.7827	8.47962	14.403	10.5566	83.9369	97.5911	9.41172	7.07652	11.4622	11.1457	147.961	153.222
RchiOBHmChr6g0299121	37.0713	56.7289	48.9787	21.2288	21.5627	16.8808	18.1417	14.523	4.84747	4.29221	13.1112	12.1024	62.01	62.0619	7.55863	12.7446	3.00187	3.75867	2.15199	2.57855	34.0251	35.9494	34.806	32.7242	0	0.144712
RchiOBHmChr4g0426621	7.45807	11.6589	9.12496	3.71505	4.21483	3.88677	0.222917	0.344737	0.981426	1.81561	1.3694	1.56288	14.1791	12.1743	22.1018	5.87475	7.00214	6.05216	4.66384	4.08364	9.76012	8.82932	5.27374	7.9325	5.29189	6.39338
RchiOBHmChr6g0251711	10.7397	12.1787	9.93965	4.22164	4.92805	4.62461	10.7571	13.5757	18.0961	14.2621	17.1409	25.6958	40.2347	28.4002	0	0	0	0	0	0	0	0	0	0	0	0
RchiOBHmChr1g0313431	44.9563	40.7807	46.5666	18.6658	17.7513	19.0245	40.7771	39.2439	43.9736	47.4501	88.3629	94.3355	73.8067	72.589	39.579	28.0574	13.3124	16.4374	5.66872	5.87421	116.903	123.13	48.2569	58.3719	51.1063	57.0015
RchiOBHmChr4g0425141	3.5437	3.75183	3.71799	1.59228	1.65093	1.35003	1.97552	1.7076	1.30711	1.17851	3.24381	3.23133	2.43289	2.56791	0	0.0326668	0.0148188	0.0185548	1.23496	1.53164	19.0763	19.7312	4.03658	2.92949	0.117526	0.163949
RchiOBHmChr5g0076291	1.06218	1.82381	0.798129	0.488858	0.554712	0.498428	0.258455	0.692805	1.54427	2.71318	9.9932	10.6615	15.362	15.1672	0	0	33.746	33.0747	6.18914	6.65906	657.388	667.479	1.06855	0.591453	0	0.0788577
RchiOBHmChr6g0277081	11.0775	8.749	10.8781	4.66951	3.86709	4.35737	46.4611	44.7965	35.7273	33.9086	73.694	71.1557	7.29877	7.66588	20.4657	20.8861	33.0653	27.4139	21.4438	22.4647	23.6356	23.3814	41.1179	39.9666	17.8483	18.7483
RchiOBHmChr4g0437751	1.39565	2.0173	1.33611	0.625791	0.927679	0.418715	0	0.213171	0	0.233894	0.233486	0.379262	2.98399	2.93699	74.6433	67.9795	0.484682	2.0482	8.14361	7.20889	2.04547	1.02654	20.065	16.0875	3.25257	4.33717
RchiOBHmChr3g0460821	4.04092	7.17192	4.88736	2.40216	2.60707	1.7237	5.45309	4.94247	7.23632	7.98259	9.00804	6.95654	34.3877	34.8812	554.097	401.25	230.708	177.854	4.169	4.476	2.32537	1.05782	28.4635	32.4178	519.797	544.557
RchiOBHmChr6g0252631	1.19329	3.05753	1.55252	0.603348	1.07765	0.758697	14.4441	15.3842	1.2399	1.39979	0.0821966	0	34.9838	36.1622	1.40206	2.27248	18.2003	20.0737	0.649827	0.752744	11.5756	14.3884	16.6143	16.2061	0.867452	0.462685
RchiOBHmChr4g0388101	195.98	163.051	186.418	78.8571	70.9136	79.9677	106.559	91.2228	537.011	521.848	1280.17	1240.64	183.94	181.646	2.98008	1.64559	1.83753	0.718997	1.35846	0.926454	313.319	280.212	87.3236	86.7779	114.203	101.947
RchiOBHmChr2g0088501	2.3067	5.81639	3.80986	1.71604	1.732	1.5635	0.988067	0.874576	0.863958	1.06428	1.20176	0.565818	2.2259	2.20719	0	0	0	0	0	0	0	0	0	0	0	0
RchiOBHmChr7g0221021	134.37	148.719	139.009	58.6875	64.0516	55.616	94.4303	93.8451	214.103	214.398	1325.87	1275.14	766.415	730.54	66.7422	63.0352	4.06426	6.17938	0.312172	1.7564	233.49	178.581	81.3533	111.52	3.7192	8.12398
RchiOBHmChr1g0358841	95.8359	179.514	126.849	51.8526	66.6202	52.1434	119.508	118.34	216.182	214.794	21.6746	18.9204	354.622	374.023	664.848	523.297	82.3279	97.0851	400.305	354.104	125.792	95.3498	65.7178	78.0008	24.9426	24.6006
RchiOBHmChr5g0073661	29.6009	29.0783	29.8714	11.9426	12.5552	13.1806	103.214	118.04	83.6741	76.5668	413.724	435.753	350.82	338.928	228.243	191.88	128.179	148.664	763.991	723.446	284.915	226.042	363.413	390.493	847.075	863.135
RchiOBHmChr4g0434891	1.46871	1.32193	1.157	0.506192	0.625437	0.549132	0.561303	0.793639	0.100866	0.145132	0.376685	0.392223	1.92016	1.82241	0	0	1.1278	0.376568	1.01063	0.227448	1.63771	1.41549	56.3952	54.6461	0.366951	0.733972
RchiOBHmChr4g0391491	2.99998	3.21606	3.31104	1.07966	1.37718	1.63743	2.05084	1.39733	0.392571	0.387329	0.257768	0.174461	0.0762576	0.0604933	0	0	0	1.04686	0	0.168615	0.273169	0.236104	0.245766	0.244862	0.102012	0.108824
RchiOBHmChr7g0177251	3.84926	4.03729	2.9545	1.42703	1.61802	1.5843	13.7623	11.3941	15.4027	15.6462	9.3789	10.7161	5.37025	6.39014	1.88431	2.16322	15.6028	18.7992	0.0527614	0	1.12217	0.785167	17.7883	16.7648	11.9733	11.3677
RchiOBHmChr6g0311771	10.0326	5.42633	8.93158	3.56201	2.98357	3.90748	32.6205	32.7281	106.407	109.185	125.908	123.086	0.391351	0.354799	1.01795	1.08097	8.58143	11.1286	1.58191	0.803516	2.60352	0.634689	1.2012	1.3763	4.03861	4.1487
RchiOBHmChr3g0453971	4.98182	5.14708	4.38279	1.75192	1.63743	2.88276	9.18651	10.0143	9.07082	7.7903	7.84634	8.10714	6.7577	6.31954	0	0	0	0	0	0	0	0	0	0	0	0
RchiOBHmChr6g0264061	1.09953	1.43605	1.14262	0.699858	0.220593	0.656474	8.30012	9.64938	38.5809	36.4552	13.9967	10.2594	1.01406	1.60886	1.15399	2.0424	12.0075	19.211	0	0	0.242171	1.04656	2.90504	2.60491	2.9844	5.69201
RchiOBHmChr2g0167241	128.587	101.933	128.077	50.7325	48.9014	54.1301	0	0.197699	0.150757	0.347069	447.457	409.811	8.50723	6.74858	0	0	0	0	0.120841	0	40.0208	29.7246	8.03806	7.45994	0	0
RchiOBHmChr7g0201021	4.75077	6.5091	5.6089	2.84852	2.37356	1.98974	136.554	130.436	80.507	81.9116	29.8399	26.8366	7.55382	11.2712	47.9609	51.6549	296.57	244.596	306.965	309.657	23.7663	20.2941	146.906	149.83	128.799	132.436
RchiOBHmChr5g0029911	0.754285	0.751184	0.653026	0.317398	0.35015	0.254844	9.41905	8.93403	7.6026	6.59187	21.4429	19.6575	9.93497	8.73319	25.8201	24.9851	5.74066	3.31751	1.10799	1.18743	17.1532	16.2114	81.7779	57.3356	222.523	181.436
RchiOBHmChr3g0465261	2.85714	4.23966	2.3097	1.11005	1.37767	1.58449	11.8792	9.97923	5.30376	7.11378	0.423961	0.908649	6.83559	8.20838	5.13829	7.35102	2.95652	3.6158	6.28451	3.88258	0.37441	0.258886	9.16235	9.26286	6.71134	9.57576
RchiOBHmChr1g0364431	43.4742	41.194	46.8344	18.2175	19.8154	18.6023	526.018	539.307	644.337	650.061	170.926	164.976	242.843	237.364	0.81971	0.116062	11.3197	12.5254	23.6653	19.3249	80.5632	78.5032	62.8861	73.037	0.449677	0.959402
RchiOBHmChr7g0210651	23.4238	33.5369	29.2253	12.6059	11.0808	13.5675	0	0	0	0	0	0	29.9475	32.9634	0.866067	1.97733	0	0	0	0	0	0	0.245276	0.162915	0	0
RchiOBHmChr7g0217541	5.39857	5.89705	2.60179	2.22536	1.58853	2.19552	26.6983	25.637	29.4265	28.0395	7.66499	6.5789	2.45694	2.24212	33.2362	44.804	178.031	158.677	52.8804	48.9342	7.38952	7.62611	175.771	190.942	242.675	241.241
RchiOBHmChr4g0423121	41.0393	31.7216	34.117	15.0617	15.0672	16.1243	0.108953	0.449315	76.7215	78.1064	542.608	543.164	3.00036	2.3949	0	0.0225203	0.265616	0.358163	0	0	337.212	327.692	55.5958	80.0847	0	2.18073
RchiOBHmChr3g0459681	12.0969	17.2154	15.2559	7.35965	5.52896	6.38047	0	0	0.149951	0.129455	1.01229	0.660836	7.85005	7.86494	0.116016	0.954794	0	0	0.570924	0.225421	175.874	189.099	14.7854	19.3685	29.765	31.2431
RchiOBHmChr6g0249241	7.7675	4.27176	7.05207	2.59793	1.69838	4.12034	2.65981	2.08932	5.41696	4.67656	21.7858	23.6249	2.49137	2.92155	0	0	0	0	0	0	0	0	0	0	0	0
RchiOBHmChr3g0451261	10.2106	7.11195	8.65714	4.28865	3.33549	3.64238	27.2596	28.472	24.5156	21.3031	101.266	98.9441	18.1929	21.5183	88.5156	67.4033	28.6655	28.2652	18.8801	16.6206	57.8859	60.9374	32.6518	30.1996	3.6433	3.42017
RchiOBHmChr2g0157791	14.6681	15.7044	13.81	6.50166	6.21786	6.46152	130.977	136.327	302.504	285.44	81.1466	80.7316	12.036	10.4539	32.7924	20.0656	54.9036	68.7454	90.5269	98.1967	24.9671	24.5715	32.3725	29.3383	69.3402	76.4774
RchiOBHmChr5g0039421	93.1075	79.3551	78.9142	35.0627	36.4636	37.7604	91.7205	95.9335	74.486	74.7311	196.701	208.023	76.1002	73.1663	57.8533	52.0679	77.2874	76.2997	80.0474	80.6749	152.442	148.591	158.729	160.735	85.484	86.0537
RchiOBHmChr5g0050381	2.8657	5.34313	2.75635	1.09503	2.03458	1.64532	3.14371	2.90718	1.79748	3.37948	1.37697	2.23668	21.59	20.4876	2.6887	1.67372	112.995	130.41	115.359	108.086	19.8456	18.7504	54.8773	63.0466	123.701	128.705
RchiOBHmChr5g0014281	49.1483	53.0461	43.0715	22.9076	21.7594	18.2756	13.978	16.4645	15.7729	16.2379	6.93281	6.64357	22.7757	23.1498	15.6933	22.0469	52.5118	50.9486	58.2175	53.9014	35.2657	40.0764	26.6919	26.8445	10.8179	12.042
RchiOBHmChr1g0377351	26.015	35.8228	23.9558	11.6714	13.7267	11.9204	87.5747	82.135	57.3333	58.3588	70.1	66.3747	165.111	170.047	67.3449	85.8449	119.004	119.407	165.161	140.073	65.0403	61.017	154.396	182.614	59.4313	47.2055
RchiOBHmChr2g0159221	154.236	102.622	118.787	57.8386	50.1882	55.5729	224.212	226.277	564.713	566.061	1580.5	1542.16	42.0841	36.6474	81.9188	103.529	300.259	249.987	132.06	141.241	104.658	52.5765	159.765	165.019	179.686	177.572
RchiOBHmChr5g0049691	3.64912	3.18672	3.86095	1.23667	1.50916	1.95269	4.38905	3.28661	2.32462	2.67585	6.51099	7.60817	12.7425	12.6942	1.34891	1.19369	1.4079	1.89845	4.4254	1.85651	4.42308	4.58752	2.22845	3.4361	1.65175	0.986742
RchiOBHmChr7g0228651	5.89793	6.4387	5.6121	2.20379	3.25173	2.35928	10.1905	11.1066	9.78565	8.89276	14.0721	12.9955	31.6702	33.8269	3.71914	3.76135	9.38453	8.97308	7.43096	5.41976	67.7349	59.9898	12.6227	17.5734	25.1908	29.3157
RchiOBHmChr2g0175271	9.81807	13.0526	10.1691	5.30662	4.58353	4.46262	37.3156	38.1587	122.295	122.395	24.4598	27.6265	3.52529	2.79653	57.0087	85.3144	1108.06	630.854	85.3117	74.9741	7.36649	5.26591	50.2795	47.1155	6.01898	8.14191
RchiOBHmChr2g0153111	156.964	138.948	112.21	57.4726	64.3217	56.2691	34.8309	35.6228	41.5538	43.0012	247.699	239.979	597.832	577.223	0.499556	4.09232	0.137513	2.92707	2.36593	0.901312	382.272	360.305	145.856	170.826	0.251675	0.447465
RchiOBHmChr7g0198941	30.1872	26.81	27.4061	11.0499	14.2323	11.5397	96.6474	96.8657	98.0721	94.1245	123.721	128.992	55.7858	66.4817	55.5115	29.5709	19.6394	19.5847	20.0628	21.5719	42.3199	43.2462	27.8687	24.582	55.2424	45.6018
RchiOBHmChr6g0254271	63.0245	46.5801	52.4993	25.7556	21.3317	23.6552	83.6654	80.2434	106.532	114.136	219.452	228.942	28.7409	28.6093	36.394	42.429	57.4498	60.0817	8.00671	8.3424	66.0928	61.0188	93.1757	89.2695	42.3072	44.847
RchiOBHmChr7g0228621	225.64	248.073	241.18	99.1218	110.743	102.149	12.1455	14.4285	10.5939	12.7735	338.466	347.389	970.532	963.857	2.72403	3.25428	15.6999	17.4281	28.8766	32.1823	595.95	576.762	103.918	121.47	123.57	137.188
RchiOBHmChr2g0091081	3.05638	2.12857	2.7	1.06586	1.49863	0.865119	1.10355	0.659893	0.607318	0.739026	2.05369	1.52941	2.45383	2.00272	0	0	0.776061	1.13367	0.111269	0	0.507121	0.584417	0.0253472	0.202031	1.23097	0.269365
RchiOBHmChr4g0436721	71.7009	46.9244	51.7547	25.0944	21.9281	27.6097	13.7684	12.0632	51.2917	49.329	347.689	355.664	1.46649	2.42931	0.834423	1.1467	0.0472894	0.296057	0	0	6.38631	1.15737	0.324352	0.0923309	0	0
RchiOBHmChr3g0459571	47.7773	38.6003	47.4175	18.9524	18.5556	21.1552	0.492247	0.174	0.0442283	0.305465	81.5691	85.4876	101.456	100.091	0	0	22.0228	18.8237	1.20536	1.52923	213.351	213.326	6.33152	9.33358	0.321806	0.514938
RchiOBHmChr1g0374491	55.8325	62.8262	67.3927	27.3483	26.1139	28.0918	51.4166	57.3753	68.3405	71.9349	157.624	148.745	624.048	625.908	1205	1335.52	8.08767	12.4939	81.8862	68.9499	629.273	628.425	38.6969	47.0651	75.0995	54.4118
RchiOBHmChr4g0445891	6.71213	5.58313	7.32848	3.8969	2.38835	2.24044	8.78809	8.30905	9.79629	13.4489	17.5047	16.7751	1.16097	1.79347	0	0	0	0	0	0	0	0	0	0	0	0
RchiOBHmChr3g0473291	4.69741	4.17454	4.00252	2.09517	1.57468	1.9898	28.8498	28.3176	24.1761	25.7142	27.601	29.7237	5.82065	4.65477	26.4148	21.2157	39.9436	38.497	29.6166	27.9288	17.7554	16.0759	48.0748	46.561	8.63763	10.4923
RchiOBHmChr2g0090521	90.026	107.99	87.9562	43.8099	41.2672	40.5919	140.538	131.227	71.3156	68.8907	79.4946	71.4334	188.026	191.412	181.979	133.209	209.643	211.247	119.494	111.802	170.901	154.466	205.356	252.476	105.057	105.656
RchiOBHmChr5g0041341	5.31266	5.06467	7.81493	2.50697	2.24384	3.30839	3.93384	4.27461	0	0.0452065	7.67168	7.12666	0.160205	0.889607	9.78402	7.09862	0.46839	0.806404	3.46274	7.97023	15.6862	12.4004	1.77842	0.62873	0.428623	1.1431
RchiOBHmChr2g0097601	14.0497	11.2988	11.2254	5.53697	4.62752	5.98751	17.8587	22.0423	30.9086	30.3059	55.1511	53.8994	15.219	12.0299	6.71805	7.134	34.1437	29.5916	31.352	33.711	74.5654	86.3033	32.8154	37.564	29.1981	35.3213
RchiOBHmChr3g0449691	3.98274	3.15833	3.3756	0.925701	1.87773	1.87547	20.9157	24.6281	26.8291	25.4035	47.1382	49.3587	14.5925	14.9366	5.75855	6.39951	21.16	17.2861	20.2565	20.6865	25.5745	23.5619	23.1354	21.2868	10.8624	12.7633
RchiOBHmChr2g0101281	6.66719	4.92428	4.37236	2.17891	2.58866	2.27283	0.22071	0.364079	0.416447	0.798947	2.23314	1.43944	0	0.0748679	29.2131	67.0618	28.559	39.2572	0	0.626045	0.450775	0.584417	261.38	262.842	0	0
RchiOBHmChr5g0069021	6.01025	9.80731	4.69664	3.56042	2.91781	2.54108	4.87912	4.98415	2.43527	2.12266	1.15653	1.67133	11.3506	11.0236	70.7156	118.892	32.8114	32.8983	19.0124	14.7919	7.97658	5.61024	16.5633	17.3628	88.275	76.5097
RchiOBHmChr5g0080631	17.3583	13.1704	17.9456	6.83272	6.74811	7.89534	17.2664	15.8353	22.4488	21.6893	34.9217	29.7911	29.1476	27.2307	0	0	0	0	0	0	0	0	0	0	0	0
RchiOBHmChr2g0119531	16.9341	30.0373	18.1943	8.96022	11.5957	8.11665	0.113733	0	0	0.0823404	0.904162	1.18681	119.152	138.116	0	0	0	0	0	0	0	0	0	0	0	0
RchiOBHmChr7g0242851	2.4106	2.45648	2.11438	1.3139	0.658854	1.10823	3.42647	3.47579	3.81473	4.44813	3.13102	4.05842	1.48204	2.21773	1.34156	1.18041	4.39457	3.97659	0.158844	0	0.965263	0.48667	1.44739	1.94678	0.58576	1.00941
RchiOBHmChr7g0242001	222.662	284.321	246.115	108.651	113.984	110.176	35.734	34.3328	46.1193	45.9345	110.313	110.565	148.568	149.379	7.89305	7.77975	5.4618	7.25963	5.87322	4.74494	76.9633	74.7664	73.1536	68.0445	5.84392	5.85132
RchiOBHmChr4g0433251	65.4969	45.4772	59.7821	25.1415	22.37	27.9861	358.912	384.748	459.379	490.011	5121.31	5148.44	195.506	193.457	310.719	147.971	689.763	625.832	387.679	390.275	956.246	932.665	541.566	507.389	54.9429	61.3502
RchiOBHmChr2g0091861	108.909	87.3752	101.732	47.9161	38.5513	45.3214	186.678	191.136	227.175	230.257	780.284	794.247	207.465	209.543	67.9854	69.3611	182.976	244.64	106.372	117.67	546.095	536.18	181.477	164.987	203.752	188.986
RchiOBHmChr4g0444041	19.5546	26.2667	26.9485	10.551	10.3888	11.2603	0	0.0536034	0.0408757	0	12.259	12.631	211.654	212.256	0	0	0	0	0	0	0	0	0	0	0	0
RchiOBHmChr3g0460951	143.041	254.299	166.845	81.5333	91.8527	76.4937	48.3715	43.5931	41.0757	40.0883	64.0838	61.426	484.616	486.637	599.797	441.97	187.429	184.108	141.397	149.582	125.263	115.847	165.138	167.471	229.596	226.603
RchiOBHmChr1g0366291	13.5269	16.9249	12.3942	6.91476	6.00381	6.04998	21.937	25.4087	39.1976	39.9829	51.4084	46.8931	54.4625	57.6852	77.9178	34.5268	59.2128	55.4669	1.37124	0.447254	116.96	120.766	72.035	61.1613	6.83239	7.28858
RchiOBHmChr7g0195571	4.24074	8.33912	3.96668	3.36581	1.84069	2.09421	0.151903	0.0313219	0.358272	0.302429	16.9613	15.752	59.0444	57.7366	0	0.15699	0.427296	0	0.727514	0	3443	3597.91	285.611	504.601	0.0434465	4.07857
RchiOBHmChr2g0102831	255.238	257.671	241.255	114.375	106.91	113.649	74.8242	69.1256	21.7732	22.6025	195.595	185.261	348.356	364.015	36.8871	61.2865	57.8718	53.4588	37.054	36.299	71.1452	70.7957	204.461	210.695	54.4	48.4715
RchiOBHmChr6g0285001	3.65136	5.33659	3.64615	1.7834	2.25435	1.53799	4.68396	4.34872	4.31871	4.42084	1.3647	1.58339	7.63415	6.47192	10.931	13.3059	48.9551	48.3409	115.077	121.244	1.75301	1.08225	24.6487	27.0722	25.7836	26.1584
RchiOBHmChr4g0443291	37.3195	35.5849	31.862	17.7968	14.5076	14.156	164.057	161.342	220.86	218.235	193.236	188.264	102.926	100.256	241.204	254.586	450.918	501.816	150.137	144.933	974.893	1067.44	362.091	381.163	104.735	124.719
RchiOBHmChr7g0230611	9.48105	9.09449	7.61808	4.33663	3.52769	3.7516	2.82978	2.19108	6.17478	6.48057	8.72306	7.49518	3.65483	3.09519	2.4168	2.86486	22.4723	18.6455	19.9725	21.6229	23.4718	20.5419	24.6191	25.5857	36.0743	45.6721
RchiOBHmChr7g0181601	15.1471	19.8496	16.7153	7.15224	8.45196	7.37136	32.4768	30.749	26.3486	29.0775	41.1096	35.97	72.6419	77.0507	3.74052	7.34841	22.7038	22.5616	29.6455	23.0755	540.452	603.152	18.715	21.2847	3.29781	2.34534
RchiOBHmChr2g0085431	110.972	144.899	120.761	51.5323	67.4951	48.208	110.378	118.45	164.506	170.875	242.439	240.28	423.114	421.803	18.0134	5.72466	1.39346	2.53784	18.7984	15.3286	7.86397	5.36601	2.35837	3.46269	12.6743	14.3449
RchiOBHmChr2g0118771	0.817058	0.984856	0.884883	0.460924	0.385217	0.338931	0.00921909	0.0304152	0.052185	0.0200232	0.19322	0.114239	1.11958	0.963189	0.31403	0.352529	0	0.0108236	0.0185909	0.00871664	0.367163	0.105782	0.127051	0.0928273	0.495718	0.0675084
RchiOBHmChr3g0461011	110.512	173.674	125.993	61.3575	59.223	61.888	161.644	170.287	158.115	166.795	134.873	151.169	601.976	570.015	267.95	289.124	135.26	135.379	112.853	101.522	117.039	108.678	193.118	210.355	318.054	316.642
RchiOBHmChr7g0210521	23.5431	54.0221	32.8638	14.3536	18.4739	16.2702	0.464411	0.45965	0.350509	0.268979	1.34254	0.908649	45.834	42.4083	1.35594	2.11184	0.0870913	0	0	0	0.0948505	0.0819807	0.256007	0.170043	0.106263	0.226716
RchiOBHmChr7g0193021	5.41931	5.28277	5.75409	3.1076	1.229	3.013	0	0.0319201	0	0	2.62915	2.77643	0.297881	0.131279	0	0	0	0	0	0	0	0	0	0	0	0
RchiOBHmChr2g0136231	2.18405	1.52581	1.7702	0.940518	0.738875	0.752614	0.0094058	0	0.00591577	0	0.217526	0.220836	0.217189	0.16591	0	0	0	0	0	0	0	0	0	0	0	0
RchiOBHmChr3g0493331	59.5942	90.6762	70.3445	37.5668	28.4285	32.1607	21.1008	24.3299	46.0656	43.3645	11.6857	9.51966	42.7382	46.0847	156.011	143.579	131.768	121.679	123.204	106.9	81.3116	75.521	134.119	146.735	257.738	248.99
RchiOBHmChr2g0152501	2301.61	2305.68	2125.55	1004.57	1030.58	962.051	91.7213	90.8765	289.828	276.544	6489.27	6139.14	15303.1	15328.8	416.386	358.533	72.7212	98.9609	29.3832	36.7747	2704.31	1804.39	1655.62	1486.6	11.6889	10.769
RchiOBHmChr5g0067421	3.84279	2.82561	3.60016	1.4684	1.91833	1.15832	3.11166	1.725	2.08541	1.73574	0.516127	0.499029	0.0872512	0	0	0	0	0	0	0	0	0	0	0	0	0
RchiOBHmChr4g0438461	2.5865	1.50479	2.57099	1.08187	0.882158	1.00713	31.7657	35.0483	29.5304	33.4878	39.5715	45.5233	12.1536	5.57673	2.44069	3.8877	23.7759	23.2272	8.99054	9.22112	25.4674	23.4875	21.6326	14.5387	44.7898	41.659
RchiOBHmChr4g0394671	1.71022	1.71024	1.38006	0.678269	0.516041	0.968166	26.9876	27.1115	19.9952	18.1316	10.6883	10.0325	8.72438	8.49543	110.524	100.576	23.3312	22.4961	15.0205	12.146	73.9696	75.9383	31.2911	33.8933	14.4497	12.8454
RchiOBHmChr1g0374711	3.1206	4.41487	3.45338	1.95351	1.65776	1.23335	0	0.0204516	0.0623821	0.19747	2.06086	2.08615	0.3393	0.42056	0	0	0	0	0	0	2.30427	1.00675	0.546755	1.13488	0	0.0302624
RchiOBHmChr5g0014141	1.38439	1.18028	1.20451	0.525908	0.616437	0.539554	14.572	15.274	16.1753	16.9551	11.5344	13.5201	2.70759	2.61863	18.7826	10.6675	17.8927	18.3302	5.07249	4.51061	3.85307	3.33027	13.4677	15.681	12.6027	15.1908
RchiOBHmChr6g0277141	5.8032	5.33387	4.62127	2.73541	1.85084	2.44684	1.08329	1.29059	6.81336	7.9125	4.10592	3.45405	0.329406	0.212314	0.53886	0.845897	1.48977	1.15878	0	0	0.270416	0.0637431	2.14537	1.27808	1.21181	0.61698
RchiOBHmChr3g0483201	48.7464	60.354	51.5569	23.603	23.7849	24.3557	5.38378	4.92053	4.8687	3.87666	14.9748	15.5443	79.4184	72.3787	3.85185	4.66179	22.2663	15.3066	4.46006	4.70514	213.466	219.28	24.8119	25.3599	148.224	131.128
RchiOBHmChr5g0031161	278.913	250.704	249.424	117.965	112.498	117.851	547.021	542.646	511.854	522.004	1267.68	1274.73	1107.11	1092.86	557.609	342.468	330.892	310.202	243.224	240.567	1218.42	1175.22	801.887	726.653	485.118	633.155
RchiOBHmChr7g0235771	7.41017	12.5389	7.33494	4.33146	5.07144	2.74141	72.428	70.6982	115.249	111.956	45.0199	40.486	11.3418	9.83839	0.3148	0.835729	0.0505487	0.0316463	0.0815346	0.152915	5.78049	1.97467	42.125	37.9481	18.2253	17.6328
RchiOBHmChr5g0063641	19.5603	20.8539	20.3199	8.48844	9.5636	9.13337	4.76829	6.48917	4.57349	3.88365	75.7281	66.0058	96.9532	86.7771	7.30901	2.46398	6.03584	6.158	5.28855	3.60673	106.882	93.2212	30.228	35.6817	34.3678	42.3364
RchiOBHmChr4g0394681	3.25932	3.52574	2.92825	1.11434	2.22225	0.978843	4.10191	4.5965	4.50147	4.17804	3.45518	3.4132	4.95965	4.95154	0	0	0	0	0	0	0	0	0	0	0	0
RchiOBHmChr5g0063661	156.703	155.693	166.485	69.3585	70.5179	74.6048	496.869	547.943	130.138	127.041	242.071	258.07	301.399	319.085	345.213	384.393	270.729	266.604	93.528	91.2558	404.334	397.399	511.338	440.616	157.596	162.837
RchiOBHmChr6g0306441	23.5459	13.4681	17.5784	8.74202	5.75871	10.0546	14.9993	15.7887	30.5947	26.9979	80.4329	79.7179	0	0.0562205	0.725855	1.45595	30.537	29.2848	1.50399	1.09694	20.987	21.2114	7.76586	11.1508	0.284421	3.13525
RchiOBHmChr7g0195961	8.09139	5.92009	7.68438	4.34171	2.11935	3.2358	22.0889	21.1679	16.062	14.8168	14.2594	12.5205	1.77848	1.82375	0	0	0	0	0	0	0	0	0	0	0	0
RchiOBHmChr7g0181041	1.19736	1.05795	1.6951	0.490393	0.705647	0.578253	6.79729	6.22152	0.106215	0.0203772	0.0915371	0.0458914	0.180534	0.238689	0.0136963	0.0290887	0.0527826	0.0165224	0	0	0.0431139	0.0248426	0.0129296	0	0	0
RchiOBHmChr7g0214691	5.73037	4.90823	7.03947	2.24964	3.3614	2.31691	46.3706	42.1248	35.3763	38.1337	26.1711	28.0953	58.5607	64.0667	0	0	0	0	0	0	0	0	0	0	0	0
RchiOBHmChr6g0294071	12.041	13.1826	12.0163	6.17212	5.16087	5.36363	51.5665	54.0504	41.0476	39.3422	75.0531	66.8532	79.5498	76.6491	15.7703	18.8747	23.4202	23.5438	18.3241	19.2146	91.8793	84.0746	39.6451	46.3008	31.9557	28.2985
RchiOBHmChr5g0023931	2.95526	4.45883	3.19593	1.47348	1.78034	1.50233	17.9444	20.2932	26.8191	25.6478	10.5621	10.7982	116.522	113.017	20.4347	24.0898	47.7882	34.0989	13.9894	16.5291	149.809	154.464	94.4144	88.0554	62.7524	50.4607
RchiOBHmChr7g0186951	169.228	156.113	182.319	74.7834	62.3808	92.0084	0	0.105063	0.0400582	0.138332	72.0831	71.155	3.75841	11.2345	0	0.0658236	0	0	0	0	0.975605	0.224861	0	0	0	0
RchiOBHmChr3g0489011	2.45743	1.80441	1.47628	0.829128	1.03664	0.710102	26.4441	23.9138	64.8786	56.3273	10.3192	8.78955	3.1151	2.47113	6.45178	6.85124	65.0965	56.9615	0.807974	0.275514	2.67813	3.60072	14.6576	20.005	2.41696	2.48943
RchiOBHmChr7g0211721	18.2124	18.999	18.8972	9.17779	7.21292	8.9067	74.3962	81.7031	79.7329	79.4673	127.856	130.404	60.5541	60.0336	90.4727	86.691	83.29	77.1621	46.8656	49.3928	343.883	367.194	69.472	78.1473	42.4018	54.6599
RchiOBHmChr2g0085831	287.926	620.99	306.114	171.957	212.894	163.108	91.5728	94.4668	82.0728	84.3682	128.862	126.741	660.196	669.758	323.647	218.685	333.25	416.777	207.681	201.516	987.378	1095.35	423.703	453.661	417.689	457.384
RchiOBHmChr2g0107451	3.14509	2.42252	3.33938	1.47663	1.04423	1.51326	1.02462	0.845096	2.26338	2.04448	1.80611	2.08623	0.641179	0.712085	0.243217	0.361587	2.24953	1.64305	2.06621	2.3865	2.98588	2.44839	2.47971	2.40195	3.71682	4.48348
RchiOBHmChr6g0308491	2.44262	2.43751	2.16634	1.20355	1.30065	0.631087	9.92908	8.75141	6.73468	7.57604	7.35175	6.98351	2.49752	2.54257	10.7528	10.0101	16.5664	16.2857	2.9445	3.58951	2.83309	2.5346	19.0049	17.5983	37.9762	29.2255
RchiOBHmChr4g0387751	59.5623	53.8592	57.8046	27.319	23.468	26.5793	17.9606	15.3587	11.2809	10.0092	58.2349	57.6269	17.9553	18.6925	7.28723	7.58669	6.53902	6.63624	7.13026	8.95361	74.1895	75.181	19.1317	23.8769	1.11978	0.925777
RchiOBHmChr2g0121561	1.10042	1.38526	1.41295	0.546845	0.494684	0.733736	0.346504	0.202436	0.227014	0.198598	0.427806	0.367226	1.53108	1.24395	0.0421535	0	0.081225	0.355959	0.0873434	0.0409524	1.09103	0.841045	0.623436	0.607925	0	0.0352408
RchiOBHmChr2g0135261	6.79763	7.61694	5.75104	2.96296	3.473	2.64334	19.7232	20.0884	26.1368	25.2043	5.93371	7.59825	11.7681	10.9224	6.69598	11.5191	28.5143	33.3336	29.8297	30.9214	59.4865	53.1963	25.4532	32.1612	16.5298	25.3026
RchiOBHmChr2g0169521	4.75456	5.78127	5.92508	2.43834	2.66636	2.32033	1.73757	3.00607	2.07907	2.48524	4.77803	4.20121	20.2242	20.1548	9.69263	9.72337	3.61611	4.42825	17.135	15.7075	15.7098	16.4959	13.3162	17.1465	9.79396	7.75833
RchiOBHmChr4g0425991	18.3848	19.7014	17.6752	8.36042	8.78974	8.04343	2.96575	2.98747	1.93666	1.65435	2.52404	2.17732	1.47609	1.42932	0.70976	1.11381	2.08943	1.24626	1.21737	1.21052	0.719912	0.350452	3.38737	2.55157	1.27933	0.998835
RchiOBHmChr4g0399681	1.56722	2.06717	1.51276	0.832151	0.761285	0.724279	5.29229	5.55548	1.81559	1.16106	8.22912	4.70667	19.613	22.3042	0.780395	0	4.36083	10.1673	0	0	339.497	371.992	6.04102	6.60598	5.50426	4.69742
RchiOBHmChr3g0463771	1.26633	1.10774	1.29005	0.555816	0.484082	0.626349	13.1434	14.279	54.1514	52.3146	9.70816	11.5552	0.841805	1.45341	24.5125	26.2696	2102.51	3680.53	4679.4	5610.05	0	0	31.3326	30.8462	6.49169	9.3984
RchiOBHmChr5g0061891	2.08078	2.27343	3.30235	1.53514	0.86743	1.04219	15.7005	12.8885	49.5604	53.5098	7.76089	8.83895	1.83677	0.401949	0.79284	3.82695	1.6666	0.695588	0	0	0.0756283	0	7.55262	8.20273	0.847279	2.89232
RchiOBHmChr1g0368491	26.773	54.4137	25.8628	13.8798	20.7269	13.8499	95.5361	100.88	112.311	114.593	20.2021	20.6153	698.927	672.868	384.196	186.378	4.86605	3.04642	5.8272	6.13347	32.6406	38.3097	12.245	7.77339	13.6286	11.0839
RchiOBHmChr6g0278231	12.5998	14.1749	11.1306	6.63401	4.94241	5.53408	33.0122	26.386	34.2483	31.1687	56.9403	55.49	46.8606	49.0642	16.8923	8.79323	7.81827	6.39303	22.1332	17.859	9.03614	8.86142	9.22406	11.6823	6.42444	4.77661
RchiOBHmChr1g0379641	1.56405	1.30155	1.41303	0.680153	0.62097	0.636078	2.69359	2.41316	2.02517	2.36477	1.58308	1.85768	0.403795	0.519864	2.46329	2.08784	3.97717	3.44409	2.3647	2.23941	5.46971	5.58152	3.25698	2.73486	5.12718	4.63823
RchiOBHmChr4g0415351	4.06574	6.11749	5.43609	2.29101	2.35703	2.4251	2.82045	2.01797	1.38921	1.15628	0.859556	1.39622	22.7843	25.6128	4.69617	3.61729	2.54901	4.82736	2.43265	2.53822	1.31865	1.22971	3.02837	4.13702	8.86388	8.33595
RchiOBHmChr7g0200251	6.98719	5.32565	6.2556	2.93408	2.13494	3.38614	30.3953	29.2499	47.6244	46.5865	42.5544	43.1315	0.575573	0.503179	8.31441	5.09595	12.0672	11.1588	0.706281	1.06488	3.80103	3.52774	10.2213	9.5928	5.92401	6.36983
RchiOBHmChr4g0416841	15.3751	11.3205	11.9284	6.44735	5.32692	5.7176	1.62978	1.92672	2.31205	1.97965	8.70309	8.56241	1.71905	2.43251	7.0848	9.99385	8.37095	9.71598	30.6197	26.9667	3.86491	2.4774	24.3903	26.1405	92.9174	84.2034
RchiOBHmChr7g0198141	14.1913	13.3837	13.1264	5.66283	6.34714	6.4827	0.538231	0.221964	0.846301	0.649445	20.0328	22.261	4.75651	5.75112	15.9329	13.3038	0.714955	0.368612	0.633137	0.381673	3.57264	3.84006	0.824167	0.821132	70.1463	71.7644
RchiOBHmChr3g0462391	142.369	107.9	128.529	55.7083	55.0551	61.3782	0	0.0947731	0.07227	0	159.527	149.281	0.49135	0.233866	0	0	0	0	0	0	0	0	0	0	0	0
RchiOBHmChr4g0424531	1.54227	2.40982	1.67029	0.949128	1.07615	0.48923	6.73451	5.8129	5.18787	5.70713	3.47112	3.30263	4.46473	4.56887	7.36715	5.07165	1.86012	2.45166	1.78969	2.81354	5.59773	4.74605	6.57104	5.16102	1.43343	0.95571
RchiOBHmChr5g0065181	2.4292	3.15733	2.57926	1.26156	1.30476	1.12548	13.7501	17.9278	11.094	11.2116	3.86452	2.9892	2.13806	2.35566	0.0675856	0	0.065115	0	0.14004	0	4.04223	3.61634	15.823	14.0484	1.66843	1.69507
RchiOBHmChr3g0461091	56.0869	130.47	63.6333	32.1572	50.8066	30.6778	0.177765	0.557151	2.03486	1.57011	20.4015	19.8019	17.2096	17.9936	80.2057	93.4758	2.00018	6.42808	3.79983	2.79008	960.922	1008.37	124.451	149.898	0.0406748	3.81837
RchiOBHmChr2g0138021	8.35251	16.73	8.51375	5.59713	4.99856	4.64688	5.42232	6.52205	7.72068	8.17841	3.86435	5.20632	29.2407	24.882	3.95787	4.66992	17.0181	19.1865	22.932	20.8632	136.046	146.635	14.3225	17.3719	9.64982	11.8566
RchiOBHmChr7g0229381	3.70434	2.87873	2.88433	1.26649	1.91466	1.10477	30.6512	30.771	31.059	29.4756	44.0802	36.4469	30.1853	28.3562	108.475	46.5565	67.786	98.1431	88.3446	70.1098	27.1905	34.4319	66.9884	70.001	8.50103	7.36826
RchiOBHmChr4g0446451	41.3311	37.8308	39.6786	17.0114	17.5729	19.5684	394.359	414.773	489.145	481.295	657.14	621.038	174.339	184.664	165.852	162.632	379.397	335.753	427.642	375.362	393.28	361.923	371.345	422.735	302.681	308.214
RchiOBHmChr1g0367841	4.08191	4.28241	4.94085	2.30271	1.92449	1.79286	1.15143	0.759751	0.984903	1.2004	1.39802	1.41179	1.65435	2.06227	0	0	0	0	0	0	0	0	0	0	0	0
RchiOBHmChr5g0004101	2.01093	2.28373	1.98532	0.904638	0.931455	1.03303	0.796134	0.820803	1.52722	0.749298	0.690451	0.908649	0.374479	0.432095	1.00727	0.575956	1.82892	2.10307	0.521773	0.526921	0.650403	0.913499	1.28003	0.765193	0.227706	0.0971639
RchiOBHmChr3g0486881	59.9746	94.4232	69.301	34.9416	33.9641	33.1976	48.111	42.7525	108.743	106.622	152.678	143.147	338.634	329.389	212.277	224.509	159.36	176.24	239.929	205.117	110.218	104.301	166.59	194.634	495.208	470.034
RchiOBHmChr3g0454041	34.5216	43.1881	36.4422	17.9337	17.9702	16.1653	74.3058	92.6371	113.691	122.903	333.158	335.688	425.405	415.988	28.2313	37.8064	77.8462	101.834	91.4903	99.8448	1956.4	2044.22	137.062	136.557	131.766	104.289
RchiOBHmChr2g0098521	31.9104	30.9703	31.2477	13.9539	14.9976	14.0352	51.4512	41.7863	61.1798	59.4198	289.583	290.401	474.684	461.414	114.72	103.556	250.506	247.836	337.145	357.561	156.475	142.497	89.5765	90.3803	181.742	176.976
RchiOBHmChr5g0038151	176.212	146.201	167.538	73.8536	64.0051	86.3274	66.6394	70.5769	72.0306	68.3547	474.834	444.382	7.61567	9.08199	129.309	183.818	68.8436	66.3288	50.5421	47.7296	13.9114	4.73666	54.5064	50.473	11.6046	10.724
RchiOBHmChr7g0200261	6.55986	5.46241	6.52978	3.13201	2.41622	2.93875	65.0537	63.6951	112.108	111.255	86.7378	89.512	1.43416	1.39268	21.2166	18.7055	36.3547	27.0201	1.04948	1.88625	11.633	9.927	27.0152	26.4923	10.0888	13.4794
RchiOBHmChr6g0311461	2.1455	4.52304	5.94821	2.08853	2.80982	0.799831	146.258	140.515	151.687	141.378	353.338	335.764	96.7885	102.031	2.15968	1.56368	124.56	124.344	143.299	128.655	42.0261	51.6367	7.78446	7.84813	1.61558	2.21586
RchiOBHmChr2g0107651	37.8676	50.4712	46.3345	19.4968	20.2158	21.8837	34.5276	35.206	3.69306	3.92013	5.79369	6.12263	53.6449	52.8362	122.71	120.061	35.408	36.6566	33.8563	31.3825	18.635	17.9685	79.0794	94.0439	45.1734	47.9751
RchiOBHmChr7g0179391	17.1345	22.7942	19.414	9.8292	8.71816	8.55846	32.4374	36.5362	28.6699	26.1737	186.304	191.795	264.824	273.383	89.8395	77.6803	103.438	218.431	110.941	91.7383	260.766	282.14	51.0701	56.3757	22.5604	21.974
RchiOBHmChr6g0267921	13.5706	14.5572	14.7144	6.43493	6.60157	6.61105	115.527	111.121	110.935	108.259	86.55	88.1854	63.8727	58.7271	194.305	86.2673	84.523	98.9549	77.4368	61.3844	35.7247	45.957	85.0615	96.8127	112.623	127.093
RchiOBHmChr4g0436931	5.0123	5.03632	4.13928	2.28246	2.30255	1.89905	76.9308	70.2464	50.8239	53.7665	39.9261	35.7139	33.2591	31.3151	57.0673	29.2986	38.7367	45.2311	67.3069	54.6394	20.5372	22.7764	55.6536	38.925	0.138604	1.92216
RchiOBHmChr4g0444931	37.6632	46.3075	40.0989	19.6754	20.1189	17.1298	44.511	45.0531	6.42886	6.63918	15.0889	15.2949	83.4494	81.5676	13.7931	13.1487	137.817	140.815	96.7763	106.104	152.316	150.013	74.0297	83.4786	8.6669	9.8649
RchiOBHmChr7g0202081	0.995328	0.846375	0.872291	0.445627	0.446919	0.346959	10.5621	10.6449	28.1024	28.0701	24.1175	23.8974	1.26537	1.20334	1.21443	0.948796	1.32883	1.2348	1.15033	0.758463	6.8083	4.66513	4.38108	3.45117	3.30388	2.93706
RchiOBHmChr1g0351721	1.99366	1.84977	1.9893	1.21132	0.792727	0.644727	0.243922	0.514137	0.664796	0.549403	1.00874	1.13125	0.150661	0.202257	0	0	0	0	0	0	0	0	0	0	0	0
RchiOBHmChr2g0149701	12.4842	22.925	14.3982	7.33284	7.88656	7.72829	1.26638	1.50236	3.16413	3.74268	0.150449	0.101825	105.989	108.476	59.5641	90.8442	3.79	4.66402	5.56224	5.1667	3.41905	4.28724	0.653465	0.746336	0.0198468	0
RchiOBHmChr6g0262351	228.541	195.376	214.283	99.4133	90.9113	104.366	10.6937	9.69561	38.6735	37.7709	457.602	454.639	157.491	159.155	38.1862	43.6792	23.2612	19.7094	44.9527	45.4992	60.7846	48.1994	27.9214	26.2712	17.5868	16.7458
RchiOBHmChr2g0085601	8.27974	5.17949	7.30516	3.07257	3.15347	3.37923	164.773	164.994	200.825	213.68	250.197	267.613	6.37139	4.6594	45.5425	71.4005	248.804	216.615	226.465	283.96	110.611	106.134	104.114	96.9644	26.5019	29.0528
RchiOBHmChr1g0369571	12.9685	11.6158	10.6148	5.55636	5.21646	5.48774	49.0307	48.3262	59.945	60.0876	88.0254	88.7168	27.7884	26.7958	5.84304	5.22813	28.1472	25.1272	20.6827	23.6786	259.46	279.626	31.0528	24.705	33.7709	30.2589
RchiOBHmChr2g0135711	87.8159	64.2219	100.576	40.6622	37.3376	38.6829	153.048	149.636	391.883	394.521	729.611	718.612	57.4371	57.5912	157.555	253.47	443.753	445.417	345.484	364.014	25.191	14.6831	349.479	358.243	105.71	102.559
RchiOBHmChr6g0275461	59.827	43.2251	50.0182	25.7356	22.6221	22.3206	52.928	51.3234	113.438	112.194	224.255	220.719	93.7928	96.5628	55.6877	135.15	43.4804	21.6929	0	0	30.1898	8.73291	130.769	180.918	4.63692	5.67396
RchiOBHmChr1g0319461	2.36046	2.83371	3.18024	1.32244	0.972603	1.59725	8.13453	8.51561	16.0373	14.7797	19.8414	19.4865	21.6063	23.7197	36.9195	26.9992	5.5005	5.69345	4.25868	4.14141	1.67736	0.7594	14.516	16.3241	7.42721	6.49123
RchiOBHmChr3g0460651	3642.98	3271.79	3531.14	1567.68	1584.93	1681.94	5158.4	5154.16	13764.3	13172.4	17767.5	16751.7	1949.1	1985.06	3.08426	26.7601	7.69892	23.8038	81.0093	76.0673	8321.04	7963.53	1864.56	1860.72	5.93287	27.074
RchiOBHmChr2g0120131	3.96655	6.04455	3.91461	2.21677	2.25371	1.95438	1.40579	1.52625	1.15483	1.19431	1.88682	2.03014	26.6705	25.9257	0.37694	0.904333	9.29422	9.43116	6.1904	6.04908	13.2717	16.8519	4.79724	5.06846	15.9025	13.3754
RchiOBHmChr6g0255741	1.05476	1.22248	1.20607	0.554795	0.669423	0.371212	55.8896	55.5355	8.52163	10.0743	3.93666	3.97044	2.46624	3.29173	7.75139	15.895	195.414	180.245	24.2302	25.6211	2.1502	1.69685	80.4503	73.7434	23.6702	22.0105
RchiOBHmChr2g0091241	21.6572	20.2194	16.7446	9.5248	8.52084	9.14335	236.933	236.378	179.766	182.08	134.946	120.769	80.8821	89.9164	247.774	199.019	371.785	371.195	4.78457	3.33891	169.942	141.039	193.653	207.789	1149.53	1182.92
RchiOBHmChr1g0370451	1.19866	1.29002	1.09089	0.58545	0.383481	0.705101	20.7211	17.4393	48.9763	50.2093	8.99395	9.21947	0.51665	0.819692	12.0528	22.5388	675.488	663.436	1046.09	1210.63	1.85074	1.97287	12.5991	9.34544	12.9243	7.52033
RchiOBHmChr3g0458901	32.8329	46.3973	31.3817	15.6746	14.0832	21.6821	14160.2	14316.4	9761.57	9853.74	1505.29	1534.04	116.3	106.763	28828.9	52361.3	1059.78	834.763	2420.09	1715.69	356.356	485.228	14136.3	14879.4	1280.27	1298.7
RchiOBHmChr4g0436911	19.1018	34.6436	27.2332	12.2452	13.0004	12.3574	0.0651806	0.0716802	0	0.125838	0.722304	0.722668	42.4582	45.709	0.317178	0.583815	1.87424	1.73456	0.372415	0.267055	110.359	103.267	5.62915	5.46921	14.4667	15.2204
RchiOBHmChr4g0425451	17.2711	18.1476	20.7086	8.24525	8.50027	9.40519	54.3004	56.4544	37.4776	39.4157	48.2283	45.1063	61.1038	55.0644	0	0	0	0	0	0	0	0	0	0	0	0
RchiOBHmChr6g0303671	12.2197	14.4457	13.6147	6.52787	6.21601	5.93405	0.181418	0.0748158	0	0.0328356	0.245837	0.177478	2.48244	2.41542	3.08983	5.29669	3.35961	3.86049	14.8394	14.6016	9.03154	9.40734	5.43787	4.33843	231.5	235.692
RchiOBHmChr2g0124071	4.15926	2.88371	3.68016	1.6698	1.84211	1.46085	0	0	0	0.0257396	2.13265	1.9941	0.486492	0.458282	0	0	0	0	0	0	0	0	0.0326643	0	0	0
RchiOBHmChr7g0183741	42.0885	45.5201	50.1258	21.4967	20.2863	22.2925	15.1803	13.8177	12.2571	11.7823	200.542	186.68	185.205	184.495	4.99118	6.14824	64.5651	62.6189	120.035	130.146	27.5823	22.1499	19.4125	17.2755	1.17345	1.58562
RchiOBHmChr2g0090531	2.23658	2.06208	1.61758	1.02511	1.10032	0.593208	1.18865	1.20663	0.356548	0.211829	0.317188	0.357795	0.125115	0.23572	0.427137	0.359087	0.342935	0.236166	0.11063	0.0345805	0.373488	0.306671	0.638442	1.37262	0.0418426	0.0892728
RchiOBHmChr6g0245561	25.2422	40.5888	28.5531	14.9848	14.9394	13.9476	0.34628	0.446262	1.11619	0.908782	2.2367	2.3572	15.9364	16.2686	0	0	0	0	0	0	0	0	0	0	0	0
RchiOBHmChr5g0039751	3.06987	6.12568	3.01258	1.63002	2.71926	1.30522	0.551386	0.552229	0	0	0	0	11.4184	12.7987	1.80153	2.52362	0.0369292	0	0	0	0	0	0	0.0360515	0	0
RchiOBHmChr3g0459001	2.3997	2.86171	1.91969	0.842924	1.45685	1.04277	25.4074	24.9939	111.323	107.063	36.4564	37.1805	4.63128	4.22748	43.6427	68.1181	988.928	879.945	2067.49	2227.48	4.54525	3.07734	260.215	246.729	199.527	239.919
RchiOBHmChr2g0105691	11.0251	5.47117	8.17079	3.81055	3.26184	4.44615	6.25129	6.99803	8.74961	8.69647	12.5807	11.3802	0.919304	1.03371	1.99074	2.58857	19.4341	18.8567	8.57595	9.08791	7.0978	5.7018	12.4839	14.5969	6.22056	7.83316
RchiOBHmChr6g0263771	9.29716	7.39318	9.25453	2.88065	3.72582	5.67153	25.4388	28.7687	33.8139	33.4166	53.6386	62.7716	17.4944	19.2155	0	0	0	0	0	0	0	0	0	0	0	0
RchiOBHmChr2g0101021	196.171	147.955	183.565	81.8919	79.0131	85.0441	949.283	904.797	1301.62	1291.78	3063.27	3098.83	219.375	235.37	645.808	637.121	889.214	841.174	558.585	590.003	800.592	699.168	977.441	901.706	511.678	505.8
RchiOBHmChr2g0165151	4.33527	10.9212	7.39124	2.92206	4.60179	3.02245	31.9893	41.758	33.5063	32.551	51.0622	49.5291	16.264	14.6961	228.839	302.231	90.1026	69.6428	89.2705	84.7837	176.197	193.085	164.307	159.552	95.9608	114.511
RchiOBHmChr4g0398501	14.0259	12.5852	15.0887	6.02386	6.75441	6.70965	26.3981	22.1492	24.9661	20.7161	57.2348	52.2022	22.5763	19.9875	1.14184	1.48199	7.15065	9.64212	16.693	19.5361	26.425	27.4419	25.8702	24.343	1.19313	1.75009
RchiOBHmChr6g0276921	5.99402	8.7668	6.3643	3.51418	2.8566	3.48492	3.5281	3.24222	6.442	6.74362	2.241	2.65927	1.27374	1.68957	0	0	0	0	0	0	0	0	0	0	0	0
RchiOBHmChr1g0368571	9.66706	7.54199	10.3141	4.77316	3.93822	4.1223	23.7779	24.055	16.2403	14.9283	34.6376	29.8037	34.157	35.6658	2.35029	3.26375	3.48365	4.14382	1.49842	1.40512	5.88073	5.90261	13.483	4.08103	10.6263	19.0441
RchiOBHmChr2g0169951	91.2027	118.324	78.3854	47.5099	43.1386	43.8473	18.5927	19.2003	66.6121	67.2933	33.9397	37.3391	13.2844	14.0101	4.15494	15.6798	85.2636	67.6083	85.9935	83.9261	86.782	74.8719	114.464	118.447	214.143	189.593
RchiOBHmChr4g0434111	45.4793	68.1598	51.5757	22.9003	27.9702	26.3702	4.28687	5.18579	2.33673	2.64381	1.60646	1.4497	275.782	286.697	4.63568	6.76051	10.8678	24.3447	52.4128	59.1473	6.45308	7.28717	7.70208	9.62123	6.7209	9.88248
RchiOBHmChr6g0301241	1.75195	2.21387	1.29136	0.717787	0.928383	0.812594	11.7093	12.163	17.1634	18.2669	11.2597	8.9467	5.11177	3.85562	2.14566	1.62027	18.6969	18.2913	0.642182	1.436	72.3449	72.4745	14.2238	15.1581	8.85602	8.7298
RchiOBHmChr5g0001361	1.67872	5.24606	1.82699	1.11202	1.89951	1.07527	24.4215	24.5342	7.6353	8.06936	4.30982	5.23197	6.80004	6.9837	2.97097	3.37503	8.52052	6.08445	1.5032	3.35618	142.457	162.04	15.0017	10.6575	11.2896	3.98558
RchiOBHmChr7g0241681	2.70718	3.31862	2.96865	1.55526	1.46466	1.17316	5.32066	4.38842	4.21188	3.78563	3.51382	4.12818	4.07962	2.17826	3.83903	3.88711	8.94567	4.20036	5.8272	2.08166	5.33973	5.82974	11.4624	12.6797	5.98221	11.0839
RchiOBHmChr1g0383171	0.801247	1.45636	0.729209	0.450048	0.755525	0.181548	2.93312	2.83393	3.90041	4.00434	13.2034	7.92506	67.0837	68.7372	3.67021	3.4644	4.47898	5.01784	11.4072	9.50835	3.50876	4.06821	14.706	20.9421	724.058	760.026
RchiOBHmChr3g0471401	44.7284	61.8262	51.0579	25.6797	25.6876	22.5904	308.56	301.876	452.367	461.126	971.382	982.584	1337.52	1300.48	213.056	248.4	190.797	188.904	81.2607	79.2633	234.548	205.414	322.437	316.105	148.223	133.123
RchiOBHmChr6g0290441	2.33064	1.9268	1.87887	0.940705	0.854639	1.10581	0.401982	0.693242	1.44801	1.48159	11.3302	10.7489	0.593809	0.644601	0.569049	0.0377676	0.0342654	0.0429041	0.257925	0.138209	4.51551	2.19332	2.45095	3.88032	0.292658	0.267599
RchiOBHmChr4g0425401	6.52643	3.09818	4.20166	2.85229	2.33908	1.26105	45.1333	40.2348	57.5276	54.0249	66.6817	64.0211	7.13846	6.61221	22.3274	27.3773	4.17101	5.51596	203.144	228.065	1.68434	6.26435	142.951	194.581	0	0
RchiOBHmChr7g0189441	5.43261	5.23472	7.2013	3.08602	2.54539	2.75827	3.42365	1.88252	1.57909	1.81767	10.1722	11.2635	21.4068	21.1623	19.3996	11.1653	2.06879	4.10883	2.68489	2.30191	29.6788	34.4487	26.7715	28.4836	52.834	56.9188
RchiOBHmChr1g0371271	0.852596	0.701976	0.682659	0.382292	0.342665	0.324001	7.63027	8.21778	1.72528	1.67779	1.66346	2.05635	0.256169	0.288776	0.15343	0.407324	1.21213	0.888424	0.39739	0.53661	0.0482973	0.0695734	2.38988	1.89043	0.0901806	0.230885
RchiOBHmChr7g0213951	4.03487	4.47108	4.06992	1.79828	2.11972	2.00427	5.75166	5.41395	14.4496	16.1858	12.0946	12.1224	120.473	124.36	0.189752	14.4409	0.487508	0.343358	1.50716	2.21215	0.0331838	0.286813	0.23884	0.0892353	0	0
RchiOBHmChr4g0443781	9.40484	10.5318	5.69661	4.58581	3.74963	3.69646	32.5474	32.4545	46.3165	46.6115	7.15452	7.80335	2.1318	2.18636	22.8906	18.6588	184.461	149.065	125.613	131.596	15.364	13.7508	140.354	147.269	428.277	441.4
RchiOBHmChr6g0312211	11.9407	13.973	11.6026	5.87628	7.57447	4.06148	138.813	130.79	127.57	128.932	154.26	156.408	93.646	98.6617	11.364	4.47263	1.6844	1.72559	2.3876	1.6213	2.91848	2.95491	2.10057	1.12116	1.96178	1.49483
RchiOBHmChr5g0001911	9.54224	9.74993	11.416	5.16936	3.16821	6.23097	0.151645	0	0.0476884	0.164681	3.67145	3.01647	0.389069	0.462959	0	0	0	0	0	0	0	0	0	0	0	0
RchiOBHmChr1g0362441	16.8232	17.0607	16.7043	8.70107	8.19649	6.85517	15.5073	15.8033	7.54943	7.9884	45.9069	44.6849	42.4645	39.2498	58.6998	48.311	147.991	154.403	17.9661	20.1605	122.195	100.548	169.119	172.386	249.743	290.803
RchiOBHmChr2g0115711	2.07735	2.5117	2.7571	1.03576	1.26506	1.16164	0.0487784	0.20116	1.56464	1.02412	7.22682	6.20347	4.04649	3.40854	0.712089	0.25206	62.7972	63.9684	15.099	14.2972	6.67482	6.02746	3.22669	4.33107	109.658	109.717
RchiOBHmChr7g0210851	43.9321	74.2731	57.2265	28.3665	29.5778	24.5269	1.36879	0.846723	1.50658	1.02637	4.55758	4.49542	64.426	60.6923	1.99822	9.90241	0	0.516542	0.345032	0.138663	10.6332	12.1677	0.583875	0.581725	0.111856	0.059662
RchiOBHmChr7g0241131	9.99583	8.66244	9.78091	5.10953	4.28765	3.96951	271.993	289.236	294.533	295.074	219.296	215.797	35.5679	29.4566	204.16	202.53	215.102	189.255	231.305	204.162	50.115	44.343	239.5	231.918	192.605	199.375
RchiOBHmChr6g0292951	20.1301	35.0429	22.77	12.914	13.542	10.3381	11.9384	11.6547	3.9028	4.63897	0.121865	0.219945	73.9791	70.4687	6.92533	9.0968	89.3944	83.8992	3.7744	3.31617	1.92858	0.863215	34.2995	31.4875	5.86455	8.47869
RchiOBHmChr2g0146691	6.17168	7.36314	8.73725	4.30501	2.80941	3.37543	0	0	0.0251712	0.0289744	0.636323	0.600328	4.48373	5.29452	0	0	0	0	0	0	0.0817383	0.0353238	0	0	0	0
RchiOBHmChr1g0330061	0.999604	0.988139	0.697462	0.378376	0.538608	0.34845	68.6444	66.6857	75.6099	78.8364	22.7593	21.2307	1.21044	0.780171	16.6156	29.8035	293.622	312.188	316.096	310.465	11.1111	10.8527	43.2367	39.6767	20.3417	19.9726
RchiOBHmChr6g0298641	11.7377	21.0122	12.0514	6.85396	7.45164	6.90036	73.4931	72.9694	89.4894	85.1065	105.222	96.0897	69.7042	76.9163	51.5256	57.0557	116.43	109.184	72.8726	69.6524	167.352	145.413	101.923	113.663	75.1146	78.2169
RchiOBHmChr7g0227931	20.1996	24.7288	17.5657	8.45907	11.073	10.1372	18.4376	17.922	26.3898	25.837	10.1933	10.0953	120.997	133.439	0	0	0	0	0	0	0	0	0	0	0	0
RchiOBHmChr2g0096551	43.2958	36.8268	36.1489	18.5268	17.5746	19.1013	712.323	722.132	799.652	803.325	317.028	312.779	147.782	152.925	320.039	401.156	305.489	283.402	127.549	118.06	381.816	369.567	867.845	862.652	362.304	360.716
RchiOBHmChr3g0488981	16.0657	21.8075	22.2217	9.50101	10.6452	8.26423	0.0977708	0.0806403	0	0.212352	2.40245	2.80565	10.2847	10.2149	0	0	0	0	0	0	0	0	0	0	0	0
RchiOBHmChr7g0177521	0.845373	0.649426	0.944224	0.356593	0.331276	0.482214	23.0348	30.6433	17.0192	13.4938	10.6956	8.31919	0.47661	1.17626	3.07346	3.00777	3.01916	1.89016	4.99475	4.68374	0.379402	0.710499	14.9622	11.3929	0.425051	1.28472
RchiOBHmChr2g0128871	11.7715	10.5979	10.2072	4.62829	4.5509	6.41497	0.0221368	0.146065	0.0139229	0.0961592	4.31961	5.34181	3.12376	2.85346	0	0	0	0	0	0	0	0	0	0	0	0
RchiOBHmChr4g0441901	3.62816	3.73297	3.73191	1.91397	1.14928	2.24786	13.5189	11.9805	8.32177	8.74614	16.4223	14.257	35.5459	32.9786	13.017	9.6612	8.22591	8.44241	5.80035	5.84712	598.035	555.607	22.0661	21.195	7.07505	6.14327
RchiOBHmChr1g0319431	1.86814	1.14085	1.66543	0.78332	0.731204	0.709574	10.4598	9.2504	10.8061	10.9703	12.6901	12.0353	0.884343	1.37607	1.81921	2.40453	2.79687	2.56812	1.56392	1.82378	3.16789	1.89557	7.05218	5.49719	3.4808	3.76174
RchiOBHmChr7g0194461	3.13527	4.10638	4.6058	1.89668	1.83591	1.90387	8.77132	8.85991	2.32657	2.57284	9.40948	8.88106	0.911775	1.13973	0.817492	1.1853	15.0403	14.3564	3.63205	2.99352	540.829	544.252	6.01059	6.13633	4.41684	3.88374
RchiOBHmChr6g0310241	45.4535	71.4079	57.324	26.1664	31.0127	25.7146	17.4948	16.0586	15.7951	14.8109	23.3501	24.568	1597.43	1704.92	86.0934	64.303	40.2163	77.8519	174.832	180.487	584.951	624.257	111.087	114.295	484.72	493.666
RchiOBHmChr2g0107291	10.0492	9.13796	10.6095	4.80618	4.62145	4.77445	19.7625	20.1185	25.1019	24.984	52.4522	49.6542	4.87609	5.933	23.1552	21.6205	25.8862	24.1583	50.7015	42.9238	29.8998	25.4266	32.4144	33.1583	86.7595	81.8269
RchiOBHmChr2g0135961	47.3173	54.2892	46.5922	26.3892	25.7336	18.2651	64.2967	66.2719	52.5241	54.2574	71.1749	71.7697	104.783	96.2701	16.5141	22.6944	93.9806	102.928	8.05123	7.31398	21.5749	12.2604	147.873	141.465	1.33225	3.55301
RchiOBHmChr3g0465351	4.23717	7.86273	4.33632	2.57444	2.0699	3.23878	1.41123	1.52029	8.74915	8.71574	3.93397	3.85061	3.71928	2.7941	13.5383	12.7693	146.718	208.729	188.232	199.903	76.998	76.6678	5.31859	8.88441	275.657	242.814
RchiOBHmChr1g0359711	2.45132	3.86496	2.80932	1.51322	1.41255	1.42417	2.61094	2.66018	2.29073	3.16103	4.69362	3.70614	7.97477	7.23419	0.170827	0.566886	86.4261	111.924	556.954	606.747	9.63442	8.69511	60.0104	61.5368	1.88261	3.05263
RchiOBHmChr7g0240831	6.11063	7.65677	5.53281	3.26837	3.21679	2.69855	0.401844	0.418656	0.492176	0.352173	1.83422	1.13107	0.416016	0.688728	1.07034	1.98907	3.41094	3.35213	2.34573	3.09954	2.31097	0.76536	5.9071	7.16309	9.5818	10.3248
RchiOBHmChr6g0266721	4.8356	6.46971	6.68875	3.07143	3.52781	1.96657	2.05231	2.57349	2.10935	2.02942	3.37646	4.1787	19.7779	18.9494	0	0	0	0	0	0	0	0	0	0	0	0
RchiOBHmChr7g0208921	1.55801	1.90793	2.15973	0.739828	0.938596	1.02963	0.805726	0.584002	0.55283	0.547974	1.66752	1.52072	0.480264	0.273313	0	0	0	0	0	0	0	0	0	0	0	0
RchiOBHmChr6g0299521	83.9886	124.949	88.3756	45.5631	53.503	43.1892	0.489695	0.342432	1.22528	1.02505	15.7412	15.2743	115.879	112.457	55.7087	33.7872	44.2194	44.7315	55.8152	54.7152	46.4088	44.8098	8.96879	9.46198	42.9436	45.4081
RchiOBHmChr2g0145711	4.68914	9.23553	5.49134	2.71128	2.92604	3.70184	3.65694	2.7595	7.16923	5.80205	1.40581	1.16713	7.31966	8.47223	0.454345	0.763921	7.33208	8.03871	2.47122	1.5449	6.51538	6.73014	1.82288	2.06544	25.2805	21.3184
RchiOBHmChr4g0435381	57.4861	49.069	57.3246	24.2489	26.6193	27.8156	20.1349	20.1107	48.9845	51.5487	113.249	104.556	44.6973	44.3796	5.83653	6.83672	33.7143	25.7855	41.5978	39.9154	56.2724	55.1723	48.8391	50.9105	56.4228	56.1613
RchiOBHmChr2g0169621	5.7888	8.36964	6.70517	3.59847	3.26681	3.10329	6.07957	5.66663	32.4552	33.172	16.6106	13.3779	3.21263	1.64311	27.0827	32.0799	327.34	360.482	165.009	164.362	1.31234	0.567139	14.6679	9.95373	5.37205	5.1275
RchiOBHmChr1g0328471	6.3689	5.478	5.01758	2.70809	2.52169	2.88278	0.22419	0.169917	0.865079	0.886116	2.87704	3.24041	1.86032	1.48808	0	0	0	0	0	0	0	0	0	0	0	0
RchiOBHmChr2g0116841	7.19708	7.90042	7.74223	3.41981	4.64332	2.85955	93.7533	93.9532	141.21	127.643	263.01	261.969	105.356	111.869	0	0	0	0	0	0	0	0	0	0	0	0
RchiOBHmChr5g0008101	18.5313	12.1018	14.7652	8.692	6.32523	6.76407	171.491	160.257	76.6882	78.9671	175.717	173.852	9.22185	7.52649	75.1757	102.976	19.152	19.3547	29.3761	26.9587	58.022	57.7449	283.679	240.211	4.86338	3.16348
RchiOBHmChr3g0480801	43.8868	43.0601	39.6175	22.35	19.2592	19.1877	198.698	204.181	340.706	348.439	594.757	607.989	121.123	131.618	305.361	336.566	523.491	488.993	738.847	743.315	39.3665	15.1633	558.98	592.9	37.0082	44.0817
RchiOBHmChr1g0337011	12.0406	23.8344	14.2201	7.31965	8.9452	7.82955	19.2421	20.4222	13.1298	11.4075	7.29434	8.14529	255.755	252.417	15.7236	8.85509	3.02976	1.53448	4.28295	2.98646	47.9752	45.5674	16.1776	15.9519	0	0.487402
RchiOBHmChr2g0161001	0.847854	0.881015	1.3193	0.462303	0.675417	0.32103	0.330248	0.54477	0.311564	0.478184	0.298343	0.0538459	57.9699	60.8294	0.241055	0.341307	0.309658	0.193863	0.332983	0	12.731	18.728	0.227562	0.151149	24.2752	21.2609
RchiOBHmChr4g0434231	3.99716	4.31489	3.61791	2.24034	1.73007	1.75883	3.32162	2.92228	7.14946	8.17624	29.6604	29.6063	2.27258	0.600927	0.359189	1.83085	8.30539	5.37295	17.4155	14.5863	1.65831	2.41056	6.57819	3.4459	1.6045	0.810772
RchiOBHmChr5g0054031	17.9437	20.5067	22.3145	9.24428	8.69165	11.5459	1.62941	1.08657	1.00301	0.527081	3.83345	3.66286	6.8786	7.33822	0.134961	0.0716586	0.195041	0.162809	0.38451	0.0655578	2.08878	1.68296	1.01925	0.539483	0.475952	0.0423109
RchiOBHmChr7g0211771	1080.64	967.774	1053.36	504.023	481.172	513.292	198.186	196.666	242.741	238.869	3266.11	3179.21	192.825	196.227	310.098	364.142	270.581	271.61	278.438	266.03	423.231	203.997	513.236	477.541	119.903	124.524
RchiOBHmChr4g0446821	26.5471	32.1305	27.347	14.5386	15.2514	11.6364	72.3243	77.0985	83.5303	81.7695	108.621	108.198	119.428	119.743	33.8442	26.4172	11.9838	12.8531	14.1351	12.5524	15.2267	17.4455	12.2883	13.7395	7.65093	10.5196
RchiOBHmChr7g0218121	1.78945	1.61933	1.43783	0.806091	0.820866	0.708073	46.6793	52.3293	62.3128	66.2101	37.4535	35.414	17.435	14.477	13.7216	8.07323	76.4617	83.2119	9.41318	6.48518	2.33478	3.19514	65.4677	59.8202	20.0537	27.4384
RchiOBHmChr4g0441501	28.5346	26.0689	29.1009	13.7695	12.7783	13.9329	65.9321	64.2095	63.6309	61.3892	119.59	118.488	43.7748	40.3676	31.2909	36.2409	54.5057	63.3149	46.4223	39.9649	118.111	103.598	87.5937	92.2155	57.5781	59.3298
RchiOBHmChr3g0461821	77.0015	70.0407	75.708	36.2084	34.9251	36.682	0.422192	0.417863	0.690397	1.1615	82.5054	76.2164	31.774	31.3924	0.082178	0	3.00861	10.0126	4.5123	4.1515	40.6133	40.4686	22.6527	20.096	3.47769	2.37021
RchiOBHmChr1g0371051	14.664	22.3176	19.9861	9.75365	10.207	7.48167	0.841198	0.545137	0.604652	0.217503	1.65014	1.95935	4.83033	3.99484	0.818679	0.683075	5.46492	5.00856	13.9947	10.5668	0.0613588	0.424267	1.32489	0.605004	0.549932	0.293325
RchiOBHmChr7g0239801	79.5119	56.1417	66.2076	34.1055	28.3905	35.2814	358.782	365.659	471.254	456.962	667.684	624.587	44.7027	39.5683	555.093	273.679	544.531	671.434	204.031	161.074	107.639	90.4049	375.8	353.748	1106.31	1320.19
RchiOBHmChr6g0245341	1.00447	0.705393	0.659086	0.434102	0.340549	0.371784	5.35002	7.01294	4.90713	6.13271	4.55698	4.96382	2.94136	3.37034	8.77097	6.18742	4.2401	5.64556	8.09149	7.52744	6.37395	7.47664	6.64155	7.46245	18.9087	19.7437
RchiOBHmChr5g0002951	5.83714	7.51699	6.86518	3.7611	2.62501	3.39647	0.759946	0.292504	1.91187	1.65055	3.11226	3.86589	8.1457	8.76465	6.70572	5.91664	1.90017	0.535326	0.664074	0.670627	1.96599	1.8781	1.90841	1.62314	0.521654	0.989305
RchiOBHmChr3g0449051	21.3545	29.5725	26.124	12.3616	11.8189	13.1793	419.17	420.317	399.67	405.307	141.324	150.261	134.476	123.284	18.8801	18.8826	158.484	134.998	11.2382	10.5384	52.2998	42.0281	136.947	136.637	3.71247	2.15236
RchiOBHmChr1g0350821	8.32594	7.97994	6.69264	3.09587	3.50404	4.64863	6.316	5.64712	12.2845	11.4892	8.24706	10.9038	1.22557	2.23249	1.34302	2.02956	80.1737	76.3335	0.267576	0.301098	4.71542	5.01253	41.7413	34.0086	1.82165	2.00805
RchiOBHmChr2g0107731	9.07395	11.1005	7.77016	4.28082	4.95591	4.31327	28.3302	26.6575	27.1373	27.5398	27.1457	29.8054	15.6292	14.6	22.4717	21.9111	60.411	72.1121	49.3514	49.4476	23.6062	24.4885	40.79	43.854	7.27355	6.33073
RchiOBHmChr1g0318381	5.82523	8.53098	8.37768	4.2414	3.72001	3.0083	91.9535	91.9299	110.137	144.87	180.174	185.989	119.152	109.762	0	0	0	0	0	0	0	0	0	0	0	0
RchiOBHmChr5g0077961	136.379	254.513	176.627	92.9121	95.9061	86.6511	3.56049	4.34113	10.8074	16.587	98.1176	101.971	8885.99	8713.24	0.753298	0.319976	155.313	93.0542	13.1112	9.22112	2074.85	1971.36	333.662	271.502	8713.73	6017.23
RchiOBHmChr1g0368561	14.8577	12.4969	16.6901	7.17794	7.00495	7.22463	10.9036	12.7902	11.4297	9.47273	28.7188	26.5484	20.7222	22.5206	0.94326	1.75291	1.13597	0	0.244308	0.229096	3.71154	3.63566	6.45582	2.21795	11.6427	13.8987
RchiOBHmChr5g0000771	10.401	11.8541	11.6863	6.06788	4.51457	5.9085	22.5716	27.3097	25.7529	24.5119	19.0091	18.0665	9.49231	8.1628	1.08929	7.61515	44.0777	40.188	0.188087	0.440938	7.42929	5.43336	19.1095	18.2707	6.40245	6.26077
RchiOBHmChr4g0387381	13.2488	11.2106	11.2352	6.35554	5.35483	5.62545	534.725	548.461	406.75	412.096	189.661	200.44	20.5036	18.7047	65.4664	64.7787	350.728	381.34	457.105	497.431	43.5037	37.3771	202.412	184.237	10.9186	13.7295
RchiOBHmChr5g0018181	47.0875	63.6438	57.8938	29.1177	25.4401	27.3909	212.57	218.226	15.7167	16.5771	2.6652	2.76409	12.7096	10.1942	9.37438	18.4875	620.709	487.307	33.5203	29.5596	3.31625	2.28331	74.2862	61.2154	14.924	16.9953
RchiOBHmChr6g0289601	10.3589	6.36126	7.73276	4.19506	4.32937	3.33896	170.597	178.995	142.276	142.309	130.213	140.088	8.18917	7.17188	138.52	115.587	254.342	258.027	101.491	96.2581	87.6927	71.7373	180.384	154.967	544.679	571.043
RchiOBHmChr2g0144151	6.36062	5.80825	3.99073	2.88307	2.27184	2.70435	0	0.0448439	0.581333	0.275539	6.60139	6.31179	1.16246	0.737723	0	0	0	0	0	0	0	0	0	0	0	0
RchiOBHmChr5g0033411	3.23794	2.37156	2.60533	1.27568	1.45503	1.26538	25.7905	23.2504	20.4962	24.1719	24.5631	20.9927	10.4298	9.01974	0	0	0	0	0	0	0	0	0	0	0	0
RchiOBHmChr2g0098171	10.9175	15.0034	12.747	6.01076	7.32708	5.40385	12.0336	9.27434	8.60247	10.3307	10.3126	7.76238	45.2147	48.4036	215.542	357.603	24.1698	26.3259	84.0046	86.7943	148.806	151.367	27.9719	32.8649	84.258	82.34
RchiOBHmChr6g0285301	982.741	945.331	935.566	484.33	450.33	458.446	577.293	572.707	1171.26	1132.61	5212.69	5250.38	68.2202	73.595	0.223085	0.651467	16.3347	10.9665	1.56006	0.650185	2536.77	2244.76	345.168	323.65	2.29462	2.16808
RchiOBHmChr7g0182351	3.35843	4.93396	3.89338	2.16757	1.55108	2.21598	19.8792	20.137	26.6448	26.5485	14.8552	14.5384	15.9283	16.3018	8.54651	7.08102	7.69118	8.04405	0	0	4.23748	1.0221	18.0867	22.1718	18.5477	14.9574
RchiOBHmChr1g0356761	6.29495	7.7823	7.40362	2.73165	3.56144	4.25365	6.33785	5.04713	7.69746	6.2498	5.84402	5.7726	5.79408	9.85981	0	0	0	0	0	0	0	0	0	0	0	0
RchiOBHmChr3g0488911	2.9787	5.06227	3.73775	2.10238	1.38309	2.2576	3.3972	3.74646	4.51341	4.94663	2.48279	2.78818	1.79545	1.39839	1.6717	0.591736	5.5118	5.73622	8.62107	6.38801	12.0447	11.9265	9.50381	11.3207	10.2187	15.5595
RchiOBHmChr2g0085421	214.246	288.658	237.985	113.127	147.062	100.375	168.081	169.994	267.623	275.391	377.481	385.022	685.483	685.212	26.7991	11.2	3.95925	2.90062	29.0891	31.0047	10.9176	9.65431	3.74531	3.33061	16.728	17.9134
RchiOBHmChr3g0475621	2.36587	2.59068	2.67791	1.44351	1.05229	1.21632	5.71562	5.61409	5.75912	5.84542	6.08391	5.21652	1.9452	1.92458	0	0	0	0	0	0	0	0	0	0	0	0
RchiOBHmChr1g0348091	222.541	248.989	213.698	110.469	113.893	109.691	318.694	330.024	418.991	445.477	954.002	998.108	750.218	769.921	332.075	399.175	497.759	526.586	215.163	201.978	1126.88	1125.15	528.48	620.46	146.354	162.005
RchiOBHmChr2g0158591	1.57809	1.72741	1.61113	0.700365	0.8871	0.814575	12.3083	7.78302	6.45109	6.73272	6.02909	9.00845	7.71933	4.26793	21.2957	16.254	14.6185	14.1294	14.7544	8.79279	9.91566	7.00105	16.7111	17.6511	25.1902	26.2044
RchiOBHmChr2g0142041	37.5383	27.9157	31.9154	15.7699	14.482	17.3023	81.1172	89.8406	122.041	115.376	432.299	421.76	28.4522	30.9723	29.5841	27.1107	49.6156	50.3603	39.9012	39.9183	139.114	136.833	112.436	116.505	267.01	274.944
RchiOBHmChr2g0088011	41.348	58.0728	44.3737	22.4142	25.0342	22.6776	0.601126	0.0826336	0.53561	0.544002	14.5538	14.1463	466.371	461.924	200.228	89.9268	18.8822	14.3502	168.042	148.201	634.173	672.632	237.344	265.129	1496.43	1471.87
RchiOBHmChr7g0218271	47.5895	46.2076	44.4869	22.6854	22.683	22.1029	150.294	148.302	133.017	136.519	62.1117	63.6855	23.3209	22.5899	17.0558	62.0874	6.17855	6.41942	0.282721	0.596514	53.9753	45.971	61.184	62.9479	1.12278	2.13883
RchiOBHmChr5g0052011	16.682	23.0447	16.3605	8.76982	10.1208	8.45638	114.767	123.483	100.314	117.448	192.495	182.246	253.741	245.193	108.195	67.4798	20.4974	25.6649	73.2294	66.2221	1450	1485.43	170.847	166.006	67.9534	67.927
RchiOBHmChr2g0136011	2.38287	3.57243	2.22797	1.09436	1.878	0.998005	1.5062	1.40794	1.01048	2.03551	3.84621	4.06027	51.5254	42.0319	6.44986	3.83971	0.188305	0.589448	1.51867	0.949407	214.413	200.919	2.58313	1.8383	0	0
RchiOBHmChr7g0182641	5.01244	3.92791	5.63348	2.59793	1.93582	2.60232	0.0601667	0.111656	0.227051	0.261356	8.77274	9.09385	0.0257279	0.0102047	0.746589	0.621815	2.2002	3.07277	4.94419	5.41854	0.829462	0.49122	2.14203	3.07041	0.206503	0.807732
RchiOBHmChr7g0181181	28.2453	24.9813	24.4125	11.1276	12.3476	14.676	0.386562	0.212555	0.162085	0	14.0618	12.0173	3.30596	2.97221	0	0	0	0	0	0	0	0	0	0	0	0
RchiOBHmChr2g0138691	8.55435	9.88075	12.0816	5.26907	4.35319	5.30122	2.02652	1.8234	0.463484	1.60053	4.66007	3.48441	550.819	543.565	497.013	391.841	52.6866	56.0199	37.5225	35.0119	32.3589	32.8465	44.8541	58.8545	30.3508	42.0455
RchiOBHmChr6g0244771	72.5729	70.4844	74.7181	38.0601	30.9716	37.4619	532.623	546.247	864.97	850.26	645.879	655.847	21.1433	19.5445	0.805382	4.91768	77.5456	111.062	80.4664	74.6736	46.4261	20.0862	217.018	211.579	0	0
RchiOBHmChr7g0239811	42.3114	29.6004	35.275	17.5998	16.3655	18.4813	82.5663	78.5583	103.569	108.276	141.982	136.359	8.61612	9.23112	178.462	63.9087	139.636	183.54	55.1109	43.9603	32.9932	24.1726	107.988	112.573	260.529	321.171
RchiOBHmChr1g0378281	11.7471	12.8624	9.61442	4.58295	6.39851	5.7817	83.3747	82.0131	66.6244	62.331	62.0953	63.5911	145.16	155.222	706.625	754.367	92.2482	97.4733	83.0032	76.6732	211.688	184.902	295.033	286.234	502.23	470.962
RchiOBHmChr1g0359621	4.0883	4.77084	4.4456	1.96737	2.72848	1.79192	54.4786	52.682	46.8511	52.8432	55.8847	50.8662	40.078	42.6923	0	0	0	0	0	0	0	0	0	0	0	0
RchiOBHmChr5g0054631	1.16017	1.10718	1.11282	0.455099	0.655321	0.547041	120.128	132.532	41.477	40.3468	54.2612	64.0093	9.92937	9.66212	11.7515	10.3992	113.364	107.594	67.273	63.2305	14.5437	11.6139	110.367	84.8797	15.5852	16.248
RchiOBHmChr2g0100801	2.87674	3.77727	2.54538	1.42228	1.91477	1.13552	0.159113	0.0524939	0.100074	0.172791	0.206988	0.321692	1.91869	1.40331	0.154854	0.279551	2.13346	2.55924	0.0160431	0.0752207	0.406212	0.660058	0.350844	0.597152	14.2533	17.0692
RchiOBHmChr6g0284951	95.5627	119.435	104.951	52.4694	53.3475	50.8675	680.783	677.713	836.06	847.257	1105.49	1076.95	758.158	802.64	179.827	190.376	73.9198	80.9239	54.5141	49.2462	255.464	272.145	156.757	152.229	81.0431	65.726
RchiOBHmChr2g0108971	4.36775	5.02593	5.44645	2.48885	2.37852	2.39594	3.87766	3.88359	3.06358	3.02169	2.20191	2.33586	4.82736	4.95039	1.32921	1.28319	2.5702	3.19575	2.33045	2.88971	4.46699	4.15593	4.41376	4.16146	2.17443	2.31961
RchiOBHmChr7g0198961	39.6741	37.1574	34.9045	18.7598	18.8114	17.1441	0.272738	0.119974	0.640409	0.631859	12.1157	12.7596	3.42102	2.80016	6.70669	5.05489	17.2534	17.9315	21.523	21.541	28.3716	28.1489	6.38138	6.25802	75.4276	71.8093
RchiOBHmChr4g0391351	17.6411	15.4572	16.1459	9.04028	7.414	7.64511	0.945711	1.00287	0.594804	0	14.7436	15.3314	0.808793	0.733252	0.131485	0	0	0	0.13622	0.127738	1136.27	1229.29	3.72373	5.44137	1.39108	1.15419
RchiOBHmChr1g0381631	53.2745	46.3409	44.964	23.4746	21.9428	25.6533	116.398	107.894	80.932	91.2273	165.639	160.096	44.5216	39.7553	301.262	399.652	150.569	144.335	168.102	154.227	127.179	109.452	167.523	179.003	73.6077	75.9158
RchiOBHmChr3g0464841	6.52721	7.67516	6.55916	3.4869	3.40709	3.27075	0	0.108153	0.0824728	0.379735	0.0947678	0	86.2384	99.2802	0.127618	20.8699	0.737714	0.3079	0.528855	0	0.803439	0.347212	3.85516	3.24082	0	0
RchiOBHmChr4g0438601	1.85684	1.51038	0.584781	0.497653	0.667709	0.787148	2.37826	4.30372	2.43347	2.49276	4.8229	4.1902	5.88932	4.40696	0	0	0	0	0	0	0	0	0	0	0	0
RchiOBHmChr4g0444001	6.86664	11.5399	8.82906	4.73265	4.34149	4.28569	84.2406	71.9186	1.93652	4.19072	1.42414	2.57032	58.1411	56.6498	168.166	215.236	761.707	843.56	1552.11	1676.25	141.867	160.338	55.1051	78.1257	5777.93	5037
RchiOBHmChr7g0240581	9.53624	13.3649	11.4936	5.79549	6.09441	4.98286	19.8074	20.5458	14.316	13.4651	4.68273	4.31335	6.23038	8.99655	0.392078	0.312265	8.93997	8.7501	3.79119	3.90429	6.7881	4.05952	11.6283	11.0323	3.2647	1.96669
RchiOBHmChr6g0294001	435.419	510.129	386.363	207.324	246.119	201.805	64.2466	63.4688	55.1738	56.2336	108.769	114.425	221.015	226.588	0	0	0	0	0	0	0	0	0	0	0	0
RchiOBHmChr5g0022971	16.7272	19.4969	19.3922	8.83205	8.67748	9.91313	5.06449	8.15693	4.6651	5.25447	11.9028	11.1314	57.0909	51.2948	5.51107	4.78075	4.78613	4.96275	6.31268	4.26061	118.544	121.185	7.40084	7.4831	10.3107	11.1452
RchiOBHmChr2g0114921	22.8212	34.3414	23.2572	11.9545	14.5862	13.073	5.51904	4.90767	6.72544	7.42943	17.8244	16.8724	81.3095	82.0521	2.64368	1.42597	3.15348	4.65721	6.52119	6.31897	214.08	218.75	16.7172	17.4845	0.98658	0.578849
RchiOBHmChr4g0441481	1.90054	2.97647	2.24578	0.943237	0.924951	1.68298	5.32237	4.98844	3.49966	3.85328	3.54681	3.17816	1.6552	1.92265	0	0	0	0	0	0	0	0	0	0	0	0
RchiOBHmChr5g0008711	2.14147	1.58112	2.1455	1.04192	0.786999	1.07188	97.4892	102.43	85.8982	81.1957	56.2437	60.6089	2.71138	2.52055	29.2159	29.489	66.2358	61.1249	54.0432	60.3266	12.2926	8.21993	93.8464	84.1599	177.785	180.949
RchiOBHmChr5g0031811	22.4564	20.414	19.6573	10.9598	10.0702	9.788	27.9421	25.153	15.6512	15.4663	23.3547	21.1261	3.80626	2.80937	0.112995	2.99977	3.91911	3.45318	0.195107	0.0365917	197.17	201.912	30.0452	27.4194	1.1069	3.16457
RchiOBHmChr5g0051791	12.861	12.4855	11.1726	6.26859	5.66264	6.09489	24.9938	26.0623	21.1958	19.9425	33.9026	29.811	89.1598	90.027	68.7373	70.6661	41.3112	36.9221	51.1583	50.7405	9.19762	11.3945	11.9297	13.2599	2.06086	1.46564
RchiOBHmChr4g0439451	7.48598	14.3851	10.2638	5.42485	5.06392	5.36086	0.0550414	0.18159	0.346182	0.59773	0.87514	0.430767	307.007	319.382	22.6056	4.38011	2.27082	4.13574	25.2512	24.8759	21.3027	19.3839	35.803	38.5934	1391.02	1255.03
RchiOBHmChr2g0116241	5.36123	3.73002	3.06799	1.93414	2.16656	1.91133	42.2267	40.8217	27.4231	33.9126	36.4084	41.0533	10.498	6.72888	39.9494	42.0169	39.4098	39.1996	25.8429	30.0832	61.4731	62.7531	54.4043	55.013	24.9413	33.1984
RchiOBHmChr5g0068361	5.98259	5.04662	5.68741	2.82434	2.49263	2.97056	69.7059	70.1391	56.5266	48.5015	61.5439	57.1536	8.17046	10.1622	2.86971	3.65687	24.5514	28.8025	21.7628	28.437	30.7135	32.2718	43.4534	38.0032	1.21443	2.44709
RchiOBHmChr7g0190021	21.5451	24.4091	22.5739	10.4586	11.3844	12.1016	22.567	24.212	21.1171	21.1862	19.0277	18.9059	6.11944	9.64656	60.5317	82.0086	26.923	20.3556	25.7137	20.4697	12.6467	10.9308	23.3461	24.1839	0	0
RchiOBHmChr5g0024041	3.17886	4.11155	2.39736	1.62517	1.76486	1.37737	0.502066	0.414099	0.631549	0.726969	0.65313	0.196465	34.6938	33.2441	11.4338	8.82095	12.334	14.1467	0.708714	0.474704	6.46009	7.62199	25.1855	31.8945	122.231	119.73
RchiOBHmChr7g0200621	5.27906	4.10645	4.7559	2.59793	2.41349	1.95174	0	0	0.0567627	0.0653389	6.22897	4.85594	0.849022	0.979648	0	0	0	0	0	0	0	0	0	0	0.0516257	0.0550727
RchiOBHmChr1g0368541	408.552	334.051	370.899	179.046	183.672	189.035	1557.14	1517.11	1452.04	1482.27	7133.17	6976.08	2040.45	2024.41	1434.58	955.24	1171.74	909.267	671.977	651.367	2481.62	2065.33	2077.72	1816.66	883.232	903.996
RchiOBHmChr5g0034591	11.5549	14.55	12.4205	6.0325	7.05945	5.99428	45.8586	42.4292	25.7455	26.8979	21.576	25.263	75.0167	75.7061	125.72	93.1981	52.6876	47.2326	34.4017	40.6987	28.7807	24.9144	98.2824	92.3262	197.234	200.959
RchiOBHmChr6g0303181	56.7638	98.8064	66.5085	36.9732	37.7198	35.4181	2.22593	1.80912	1.09343	0.882219	0.211363	0.169544	434.993	444.099	10.8949	23.2733	0.898843	0.629489	1.27781	0.768106	8.99282	12.6054	1.31362	2.06728	14.6475	14.6341
RchiOBHmChr7g0238561	12.485	10.5591	9.35405	5.11578	5.12882	5.85465	25.296	24.2654	86.8391	87.5017	225.702	226.887	20.4175	20.0559	0.173006	0.349064	79.7239	105.082	87.0914	86.3747	153.703	155.253	91.6398	97.1766	29.6519	20.1766
RchiOBHmChr3g0484891	4.59939	3.65553	1.70183	2.14433	1.33613	1.44539	7.24711	4.99372	54.5814	53.0652	76.0444	70.4185	3.37354	4.66769	0	0	0.258048	0	38.2006	40.6792	7.307	4.77714	8.25964	7.89335	0	0
RchiOBHmChr4g0443761	1.7726	2.87763	2.32697	1.0468	1.09404	1.33693	1.30701	2.7549	6.16531	5.20434	3.56846	4.02529	3.53964	2.61087	0.565342	0.150086	7.35311	8.01342	44.7331	35.2196	65.0297	71.4594	8.53912	11.0999	28.2445	22.8636
RchiOBHmChr1g0339351	2.57413	1.628	2.73315	1.13677	1.4968	0.785147	106.623	102.459	61.6471	64.8349	9.33083	9.42945	0.578962	0.623304	16.0006	26.8363	92.0863	92.8208	73.1335	62.9105	4.14791	6.27392	36.8739	36.5168	23.1243	29.0354
RchiOBHmChr7g0220681	5.58852	4.83964	4.12066	2.3972	2.4494	2.38641	20.1548	21.3235	18.9044	19.588	13.8657	14.1119	2.32687	1.95676	5.19361	6.07032	10.8615	10.337	1.31868	0.894303	1.40711	0.968823	6.87691	6.48817	8.884	9.90471
RchiOBHmChr2g0097351	14.8299	22.8634	15.1055	8.44328	9.17234	8.61733	5.89909	4.84211	4.60211	4.29134	11.7242	11.5419	51.1294	46.967	438.068	495.821	13.2432	11.5874	2.14469	2.2793	4.31534	4.85626	25.8743	25.3117	4.57498	5.50348
RchiOBHmChr1g0336391	2.5142	1.91322	2.00214	1.05007	1.0776	1.08058	3.76898	4.03854	3.89005	3.63821	5.00544	5.42038	3.52636	2.70996	0	0	0	0	0	0	0	0	0	0	0	0
RchiOBHmChr2g0147001	18.5845	23.3205	20.337	10.3609	12.7246	7.80316	132.088	133.189	134.144	128.426	259.844	252.574	102.075	106.555	20.6286	10.8553	2.12562	1.64126	1.86668	0.893086	3.89691	3.30146	1.87449	1.97134	2.07483	2.07503
RchiOBHmChr2g0120151	0.90051	0.692665	0.47807	0.332843	0.413087	0.282092	54.4635	60.4547	31.5361	36.748	19.5915	20.6195	21.7049	24.2979	2.46397	3.19089	8.4534	8.62716	8.34303	5.02108	6.74726	9.1564	18.2112	17.6355	0.918394	0.979714
RchiOBHmChr6g0305951	1.44015	2.49023	1.52912	0.745506	1.0137	0.96515	6.80087	6.82746	16.3967	17.3821	2.6313	3.00176	2.99625	4.54399	3.61026	4.33077	12.6893	18.3079	0.207794	0.0324759	13.2235	15.6433	6.43764	6.31962	0.432256	0.880314
RchiOBHmChr5g0073771	44.5787	66.5735	50.2236	27.4948	25.9135	26.9625	66.1608	68.8885	90.4584	85.0386	165.804	154.517	364.545	358.985	5.70189	10.0423	6.09639	5.70404	1.87303	3.78302	234.646	254.834	14.1788	19.8165	33.1867	37.6697
RchiOBHmChr1g0345711	2.06489	1.48431	2.30393	0.867512	1.15504	0.896694	19.2088	15.941	11.4102	15.1944	27.5936	26.6022	6.49001	4.42438	26.7725	23.0383	20.0125	18.3757	8.72752	9.52942	5.56994	4.39556	16.7766	19.7539	37.4407	38.3487
RchiOBHmChr7g0217441	10.4752	14.4452	11.3421	6.09604	6.01955	5.96288	54.1576	51.6467	32.2209	32.9407	13.9166	14.2689	10.0468	9.82224	15.5938	33.0258	56.137	58.7118	20.792	19.6842	0.917168	0.840285	45.9616	46.598	0.287706	0.526141
RchiOBHmChr6g0301251	12.2141	10.7723	11.8845	5.8292	5.57692	6.01719	28.4187	31.8529	21.8505	20.4093	16.8407	15.8137	13.6572	12.3596	4.56737	5.6922	34.8365	36.1197	20.4719	20.3373	395.21	406.423	30.092	29.6531	6.63677	6.08553
RchiOBHmChr7g0201691	7.85474	6.80853	7.91662	3.37391	5.4515	2.38364	165.461	160.554	190.756	195.824	352.503	370.524	52.897	61.8778	26.7368	27.4188	43.1286	37.4142	33.5563	32.9511	16.8326	17.7355	43.9899	49.7196	22.8091	14.3693
RchiOBHmChr2g0087281	44.2145	63.8289	35.0045	24.5145	24.7804	22.1251	740.589	745.695	492.213	475.253	512.464	534.475	242.493	235.548	320.283	209.608	890.627	850.724	1726.98	1928.04	874.576	885.96	594.409	641.641	988.576	1017.31
RchiOBHmChr2g0102671	238.962	243.61	209.846	117.331	116.455	112.043	15.6993	14.7273	16.4696	16.1239	74.3182	76.0316	164.989	164.027	31.0056	41.8724	22.3395	20.3756	19.4362	21.0575	179.587	172.513	77.9218	71.6753	13.4356	10.3285
RchiOBHmChr6g0283681	17.5982	22.7405	20.416	10.6299	9.7913	9.90676	12.7479	15.8558	16.5072	15.5958	23.8456	22.3633	84.6529	78.8078	88.704	55.7991	13.1676	16.4072	17.8024	18.0474	105.119	107.041	38.2679	36.879	26.9069	24.1275
RchiOBHmChr5g0061961	2.63694	2.7821	2.40611	1.49672	1.01013	1.40753	50.0171	43.0347	209.561	216.612	24.3168	32.3025	2.20432	3.96987	6.23731	16.6307	199.221	132.902	3.51193	2.8322	0.142276	0.245942	20.0325	18.6835	2.94879	6.20634
RchiOBHmChr7g0179381	41.0509	30.7713	41.0653	18.6748	17.4454	20.4201	61.2641	62.9836	149.187	153.226	341.307	348.589	9.94664	11.5242	3.37588	6.22085	49.361	54.7385	27.6197	30.2407	134.657	120.619	60.1762	60.6084	10.2713	13.4473
RchiOBHmChr2g0133691	71.4645	85.1434	97.9072	41.1363	42.2829	43.9937	0.214001	0.676604	0.42622	0.903768	2.16526	2.41919	173.715	175.213	6.03989	2.4697	4.18038	8.83549	9.92556	10.3529	25.5322	26.2548	4.62041	7.14996	37.2141	38.2188
RchiOBHmChr2g0094901	3.46225	2.6083	2.849	1.88656	1.67315	0.844828	41.2946	27.0264	24.8996	23.3703	19.632	22.1651	5.72974	5.28903	29.2823	44.9435	56.0811	51.3419	40.7768	36.5102	16.1712	18.3852	51.8169	39.3607	36.652	38.5045
RchiOBHmChr2g0173951	6.13305	15.5415	8.16659	5.11324	5.78308	3.98667	0.141805	0.233918	0.0713505	0.164262	0.0409937	0.0369934	2.54677	2.65524	0	0.0293108	0.106371	0	0.0571918	0.187707	0.463392	0.125161	0.104227	0.33749	0.0324467	0
RchiOBHmChr4g0409531	2.40933	2.60627	3.34529	1.48906	1.53786	1.13058	16.4475	16.1824	13.0227	13.6	14.24	10.1823	7.85425	8.04312	0	0	0	0	0	0	0	0	0	0	0	0
RchiOBHmChr6g0266761	4.43875	4.65959	5.39494	2.57833	2.41178	2.25297	8.27536	9.3423	4.94454	4.79294	19.8859	19.2271	18.3124	22.0007	0.201346	0.320718	3.29775	4.67565	0.573643	0.146707	15.6338	19.0363	11.4045	9.7528	27.1007	29.9202
RchiOBHmChr1g0364341	2.68217	3.48027	1.52812	1.65884	0.986972	1.19722	7.54149	7.59222	12.6951	7.46717	7.61443	9.11362	1.51756	1.35433	749.61	603.121	113.661	98.3058	57.1414	47.8161	2.37834	2.25141	23.4354	22.7401	174.081	161.882
RchiOBHmChr3g0464261	61.7543	62.3148	47.6215	27.2178	29.1297	29.8306	26.7224	25.6661	28.5197	29.7464	57.4375	49.7782	34.7244	37.503	7.71452	12.02	48.7819	54.253	30.2942	28.3097	84.6585	88.9057	48.8162	54.815	57.0255	60.4106
RchiOBHmChr2g0109251	2.11807	3.17909	3.14072	1.24854	1.8939	1.06931	0	0	0	0	0	0	3.78821	3.21475	0	0	0	0	0	0	0	0	0	0	0	0
RchiOBHmChr4g0434171	149.883	221.192	201.756	96.3863	96.1177	95.441	0	0.247623	4.53184	3.20601	7.05175	5.7762	534.06	528.247	0	0	0.0703768	0.0881195	0	0.0709658	253.624	257.966	38.6165	35.3826	0	0
RchiOBHmChr1g0354261	5.33238	6.36797	6.90738	3.05371	3.4191	2.86255	6.859	6.77378	4.82483	4.76974	4.95709	4.82651	13.8931	14.6335	8.69556	8.67432	15.5707	14.0923	11.4657	10.1544	31.9804	27.3225	13.5155	10.5743	40.5778	42.6262
RchiOBHmChr5g0017411	13.8835	12.5536	12.075	6.45663	6.34015	6.60835	13.7216	14.1564	37.0539	35.0237	33.5918	32.5434	16.1607	15.1869	24.9766	27.0312	257.366	239.062	119.536	126.461	70.2292	65.5156	190.435	205.573	380.885	416.119
RchiOBHmChr5g0070231	5.16992	3.8696	4.11697	2.17439	2.05055	2.42792	2.33797	1.77559	0.844426	1.08094	1.42201	1.21531	0.425633	0.424018	0.473099	0.538277	0.705412	0.611483	1.12032	0.853579	3.56945	3.94324	2.84984	2.95588	8.48779	8.58836
RchiOBHmChr6g0272531	1.13639	1.8089	1.08791	0.573236	0.86075	0.590951	2.56565	1.8386	1.0846	1.49207	0.972711	0.685773	1.29494	0.99871	3.31565	2.17342	2.99725	3.90103	4.53768	4.41421	2.57707	4.00932	6.49195	7.62305	4.37883	3.59323
RchiOBHmChr6g0292061	2.61276	1.88422	1.60048	0.876109	1.28869	0.907272	14.7023	13.7263	8.7119	8.79622	6.05067	5.17167	2.59043	3.11702	17.8859	12.4512	26.3587	27.0106	31.5012	28.0274	20.1228	20.9069	34.301	42.4925	31.1488	26.9567
RchiOBHmChr1g0369771	17.2212	21.0647	19.1424	10.4979	10.6781	7.69862	58.4893	55.1579	42.7955	42.5755	92.7506	82.1073	1141.5	1146.71	110.541	105.976	1464.73	1645.56	2305.65	2651.67	3513.15	3475.7	989.113	1245.88	709.593	860.743
RchiOBHmChr7g0236361	2.07071	2.89936	2.81824	1.19067	1.38453	1.35506	3.88513	4.33384	3.14457	4.28829	4.48793	5.00536	1.8792	1.12345	0.8678	0.36203	2.14991	2.01894	3.11458	1.86681	5.07315	4.89073	5.76381	4.89723	3.6433	5.44118
RchiOBHmChr2g0093031	6.05074	5.0989	4.23982	2.72749	2.49923	2.53166	29.5651	29.3787	17.8037	21.2052	12.5588	13.6666	4.37103	4.61435	41.2473	32.1398	154.018	147.105	24.7755	22.9355	5.98211	6.00324	58.877	63.2307	56.0888	61.1293
RchiOBHmChr2g0137891	2.83329	3.33311	2.72375	1.83265	1.2275	1.4014	1.90085	1.88848	2.39107	2.25191	3.93397	2.19766	5.28335	7.0341	1.80792	2.85746	6.11664	7.86159	6.96941	6.61715	23.9994	30.8476	7.97789	7.11807	18.3859	19.3499
RchiOBHmChr3g0459021	9.36962	8.45747	7.70904	4.18774	4.27668	4.44051	21.7654	23.1399	70.8137	69.89	134.077	136.287	15.6882	13.8913	30.455	23.3646	65.2969	62.4469	81.4403	86.8207	17.0395	13.8215	45.3619	47.869	154.614	165.901
RchiOBHmChr2g0098851	13.1226	8.48943	10.4808	7.29559	3.88733	4.99436	50.0745	51.7782	34.3809	38.4481	149.259	154.951	27.5452	27.2442	1.11665	2.54098	30.7381	25.2093	23.2201	20.7669	1.0043	0.289344	21.2335	21.6054	0	0
RchiOBHmChr2g0126521	10.7403	12.3025	10.5635	5.45975	4.05096	7.58638	0	0.210125	1.92279	2.35164	3.68241	3.11537	0.0544697	0.172838	0	0	0	0	0	0	0	0	0	0	0	0
RchiOBHmChr1g0340371	2.8408	3.4588	2.70291	2.04972	1.53068	0.900243	9.81502	10.5651	7.84723	8.06936	9.73845	11.7175	22.1944	15.4619	18.6188	12.2068	8.89111	4.1015	4.86429	3.30309	14.27	13.068	16.201	10.2026	7.80318	7.7151
RchiOBHmChr7g0194661	65.8919	73.9864	71.7291	35.897	35.1244	35.9733	111.008	118.766	121.722	114.846	262.65	239.59	199.598	196.756	445.295	368.263	60.1722	67.147	21.4547	35.7668	237.184	239.384	302.864	311.23	779.776	812.055
RchiOBHmChr6g0301261	19.7951	16.5697	17.3645	8.49285	9.8067	8.91518	39.4191	40.2766	23.6825	23.3325	20.5043	20.7204	19.8471	17.9617	8.01633	10.6071	74.2293	78.2842	50.0939	46.2949	870.377	932.762	50.7509	58.1038	4.7865	6.86131
RchiOBHmChr2g0174791	12.1627	9.84682	12.4456	5.60192	5.11037	6.84292	0	0	0	0	4.62503	4.05776	0.152029	0.120601	0	0	0	0	0	0	0.0726128	0	0	0	0	0
RchiOBHmChr0c32g0501601	3.28437	5.72286	3.48726	2.46352	1.80129	2.04444	0.737386	0.561404	0.606479	0.246393	0.0409937	0	15.3776	18.0479	0.883257	1.34829	0	0	0.0571918	0	0.057924	0	0.62536	0.623058	0.0648934	0.138452
RchiOBHmChr2g0166581	225.164	238.685	184.289	109.569	117.406	101.515	289.793	264.654	220.213	209.498	367.747	380.612	468.491	467.392	760.009	719.128	106.092	87.9263	75.7957	71.2091	886.293	916.797	1101.1	1147.45	27.1121	37.4188
RchiOBHmChr6g0304481	1.39215	0.920741	0.894188	0.631685	0.583425	0.398413	1.27991	1.47152	1.54291	1.43908	0.85493	0.841064	1.26046	1.36827	1.11353	1.10231	0.863715	0.831021	1.07542	0.898447	0.306954	0.171164	1.38972	1.23372	0.787612	0.852033
RchiOBHmChr7g0240591	10.9353	14.1807	12.5397	6.64069	7.01169	5.3875	35.3188	38.0908	21.0601	22.6759	5.81203	7.39188	12.5889	12.9218	0.9154	0.826266	10.5391	16.3434	7.87147	6.93668	7.10778	6.93204	15.9869	15.0671	1.88314	4.87869
RchiOBHmChr5g0009141	1.68429	1.27342	1.52874	0.766252	0.678819	0.845173	189.311	194.167	170.581	176.792	203.334	201.996	108.609	99.1036	46.8415	38.5716	83.1326	73.3595	48.6988	54.7678	447.522	470.122	57.4076	55.032	6.18257	7.21368
RchiOBHmChr7g0180621	3.77016	2.82087	2.51589	1.3142	1.64842	1.68317	7.80092	7.33577	4.89144	5.0498	2.76095	2.95263	1.59039	1.42285	6.86931	5.21922	10.6682	9.98171	1.82111	1.99983	2.46935	2.29686	10.868	12.378	2.9024	3.61102
RchiOBHmChr1g0381441	3.36592	2.06887	3.52205	1.41764	1.65592	1.4879	0.41281	0.749058	1.03855	0.59773	1.43205	0.91538	0.988524	1.68037	0	0	0	0	0	0	0	0	0	0	0	0
RchiOBHmChr6g0264441	1.38713	1.27495	0.823049	0.470767	0.596285	0.721751	6.27855	7.17386	26.3018	27.5651	10.4489	8.30228	0.394096	0.625254	0	0.238121	1.72832	3.11082	0	0	0.058822	0	1.32303	2.10906	0.790793	0.210898
RchiOBHmChr6g0295711	63.3451	57.6548	69.2395	33.2135	30.0658	33.6298	26.0193	22.1301	26.7873	27.0671	79.3524	82.3682	52.9952	49.8018	22.4852	45.2755	20.6597	19.1086	22.1414	23.2055	100.78	88.2785	54.4226	58.31	6.20688	4.45924
RchiOBHmChr7g0239311	262.112	242.044	237.528	126.864	123.869	127.117	932.028	921.102	768.967	785.945	1108.47	1132.47	501.344	505.05	347.9	338.346	807.182	733.4	323.997	299.484	2410.17	2451.77	1060.97	1129.68	172.104	197.998
RchiOBHmChr7g0179441	5.55176	5.17965	3.40789	2.44679	1.84042	2.96339	35.3973	34.4485	41.2908	45.3126	22.5724	20.6892	4.71372	5.56738	2.26486	5.82285	53.9774	66.4353	0	0	1.62601	0.540532	57.0529	54.4884	42.3183	60.989
RchiOBHmChr7g0223651	2.7541	1.56827	2.06885	1.32915	1.13064	0.77718	19.9675	26.7512	23.323	25.3171	45.2775	39.9633	3.97551	4.65884	4.52407	5.56849	28.2324	27.4118	19.1741	17.5807	4.20759	1.77171	18.2481	20.4051	2.65909	3.35238
RchiOBHmChr1g0377041	13.1815	19.7567	25.8771	11.7801	10.2833	7.86755	0.142667	0.323593	0.807574	0.92959	0.463983	0.837411	97.8842	93.4984	0.381832	2.4697	17.7917	14.6142	10.8965	7.08182	31.8333	28.3955	187.798	198.534	0	0.0435294
RchiOBHmChr3g0456701	27.8029	35.7054	31.6763	17.9165	15.262	15.38	1.50405	1.526	2.55286	2.46984	5.03004	5.18393	5.20054	4.46334	0	0	0	0	0	0	0	0	0	0	0	0
RchiOBHmChr2g0158611	26.9228	27.7897	24.5875	12.6829	13.7267	14.1264	36.0974	34.7871	31.4662	33.3778	25.1269	25.2357	40.0786	36.0897	73.3439	39.7279	30.9966	36.1345	28.734	27.9029	19.2072	22.7496	54.2269	51.7664	113.75	116.089
RchiOBHmChr5g0021401	0.740251	0.899619	0.960642	0.449934	0.325738	0.561958	26.9911	30.0139	115.194	123.439	26.7348	24.9903	7.21356	6.13108	197.483	109.961	1981.5	1767.35	2680.76	3016.27	13.1663	10.529	58.674	54.3769	387.095	323.235
RchiOBHmChr3g0461351	108.444	102.08	88.6026	51.3932	52.4318	48.8731	90.1943	92.6925	179.551	192.177	773.602	809.862	310.389	318.914	5.59871	16.1374	608.563	745.465	177.325	189.983	2121.68	2237.19	1102.08	1046.59	702.921	741.329
RchiOBHmChr2g0112461	90.3014	143.175	110.819	56.0809	62.5323	57.2507	50.7414	45.8126	49.0326	55.5493	130.664	126.347	1692.2	1645.43	337.171	277.095	109.822	126.086	39.8614	38.8932	728.829	755.382	681.629	684.418	175.844	165.039
RchiOBHmChr6g0251351	9.74291	6.10817	6.38567	4.36943	3.11903	3.88893	43.6674	44.9155	43.4696	47.1634	40.6074	46.5361	4.00439	3.10753	22.8838	23.985	27.2011	32.1467	25.2474	19.6332	52.7005	50.9403	59.2907	49.0096	42.0393	46.9581
RchiOBHmChr5g0001701	2.07777	3.34088	1.8696	1.53514	1.12904	1.03119	0.476829	0.884887	0.412364	0.388365	1.16306	1.01069	4.02697	3.80105	13.0518	14.2295	2.90615	1.60948	0	0	3.22593	3.94559	10.3498	10.2026	2.93217	3.05521
RchiOBHmChr3g0459421	6.45884	4.2789	7.07788	3.04076	2.37749	3.75045	0	0.0321433	0.0245112	0.0423218	6.04145	4.72752	0.183312	0.383371	0	0	0	0	0	0	0	0	0	0	0	0
RchiOBHmChr1g0371061	41.5335	65.5345	45.0744	25.9055	27.4433	24.4775	87.5106	88.7992	107.996	100.68	79.5052	81.469	245.476	245.11	67.503	95.0774	1491.02	1694.5	1263.62	1424.74	36.8595	29.4826	80.337	83.6421	33.004	32.765
RchiOBHmChr6g0281521	144.595	204.098	167.458	83.4395	92.3813	88.3938	4.83103	4.78861	7.5582	7.95694	18.6044	18.7581	542.752	544.445	62.8601	87.3653	38.366	36.8771	10.7337	11.1583	247.533	261.818	23.0406	29.1152	268	272.154
RchiOBHmChr5g0055021	5.05616	6.21785	4.72229	3.36131	3.53158	1.19949	34.8639	38.1662	129.041	136.07	28.5561	32.2463	4.51763	9.31769	29.098	67.6953	1056.09	885.613	364.096	395.266	1.83408	0.186496	37.3697	39.5531	16.0754	11.9912
RchiOBHmChr7g0243671	46.5579	68.816	47.0599	33.6161	24.3767	25.113	2.93767	2.76502	4.6952	4.04094	0.0624439	0.202861	3.11829	3.30603	3.2122	10.4476	68.8305	52.6473	23.8877	23.593	12.0879	10.158	61.648	61.6109	137.697	143.685
RchiOBHmChr6g0272011	2.96976	5.39308	3.79455	1.82848	1.99343	2.42575	2.48792	2.54449	3.12955	3.67444	10.0691	8.04804	10.2131	9.78965	0	0	5.22548	3.73878	0	0	801.216	809.325	5.94301	8.28959	1.48009	1.70037
RchiOBHmChr4g0435151	3.69384	7.07927	4.19935	2.04106	3.69415	1.91193	0.0631494	0.31251	0.0397178	0.0457188	0.0912778	0	44.8256	48.9687	1.0448	2.08845	9.11868	7.11746	8.91414	8.83675	0.128975	0.111475	6.49808	7.51464	1.66167	0.924846
RchiOBHmChr1g0378221	2.80073	4.50571	3.75066	2.08117	1.68923	1.89323	5.20995	4.94285	2.63218	2.49398	1.0905	1.13262	1.91131	2.08598	4.10071	3.26596	15.8299	15.1246	7.79353	9.30019	4.49177	3.06564	10.8288	10.5414	9.72244	9.086
RchiOBHmChr6g0275051	1.80214	1.71178	1.40457	0.934046	0.958119	0.608155	24.2396	20.7958	14.8371	15.4336	9.38477	9.24529	5.96919	7.45154	16.3239	13.8677	14.8647	13.0857	14.4569	11.715	7.1276	5.87395	27.1417	20.6528	20.3034	21.9892
RchiOBHmChr2g0119541	3.39792	6.32059	4.05451	2.26814	2.34962	2.44791	0	0	0	0.0396529	0.277085	0.142883	35.9741	112.849	0.213219	0.509445	0.102712	0.128607	1.93286	1.50179	1.45422	1.06353	1.15738	1.20325	10.4018	8.68984
RchiOBHmChr4g0387351	7.32984	6.62066	5.57454	3.35109	3.27898	3.41075	5.23722	6.53478	13.0913	15.8471	45.1289	41.8636	50.4173	48.012	23.1326	65.5064	232.062	224.98	2.84339	13.9666	887.115	881.954	105.364	106.451	1208.48	1309.49
RchiOBHmChr6g0256341	5.58666	8.84261	11.0008	4.60148	4.21429	4.21355	0.228633	0.565722	0.143799	0	0	0.223668	0.586597	0.232666	0	0	0	0	0	0	0	0	0	0	0	0
RchiOBHmChr6g0310121	1.78743	2.78079	3.04805	1.45833	1.27684	1.15646	5.11489	3.71498	1.87258	3.8136	0.71725	0.298734	24.0917	22.7368	2.00604	2.60364	7.44451	7.52878	3.38685	4.5474	47.945	41.7764	6.73333	6.77842	23.1449	23.0132
RchiOBHmChr6g0283731	50.0086	84.0206	66.7159	33.8072	36.3004	33.0458	483.731	443.938	351.274	344.782	66.639	54.7172	2579.24	2490.67	436.069	390.394	384.025	372.111	309.152	319.218	610.492	619.595	473.101	461.898	305.342	295.06
RchiOBHmChr2g0135921	35.3721	22.0498	30.329	15.9868	11.912	17.2967	122.981	120.897	390.952	400.917	314.999	314.783	1.21904	1.31624	0	0	0	0	0	0.0374367	20.4998	10.7288	11.4225	15.8747	0	0
RchiOBHmChr2g0171171	3.44145	3.27191	2.43603	1.68866	1.53239	1.47734	0.0359544	0.0296548	0.180908	0.143166	3.09218	3.14217	1.46058	1.58551	0.017496	0	0.337128	0.886453	0	0.0169975	1.68895	2.28488	0.445947	0.888611	0.370206	0.351044
RchiOBHmChr3g0480551	6.67343	5.81991	7.64595	3.71425	3.48289	3.14318	9.93665	13.5293	13.0614	12.8272	11.019	9.39509	29.9005	23.327	0	0	0	0	0	0	0	0	0	0	0	0
RchiOBHmChr2g0152351	356.327	285.26	322.62	166.798	156.715	173.115	178.209	191.09	345.587	348.841	2063.19	2049.55	262.832	251.404	1321.63	1209.25	59.0655	74.3976	48.1726	47.4229	261.787	184.982	185.936	188.461	11.8919	9.17052
RchiOBHmChr2g0139081	20.5387	17.1769	20.9769	10.6046	9.91493	9.69931	221.688	212.009	241.441	247.312	246.213	266.604	48.1212	48.0817	33.9639	91.5175	135.07	119.486	129.278	116.867	193.103	207.338	128.109	143.258	16.7089	15.7607
RchiOBHmChr4g0400941	88.6902	99.8343	92.857	49.1295	46.3113	49.5224	808.505	768.911	729.419	732.656	736.54	777.99	1349.17	1377.97	601.341	620.261	680.116	666.702	542.026	499.899	1090.93	1135.87	1082.84	1053.48	596.053	533.305
RchiOBHmChr4g0400101	5.8882	7.07723	6.07477	3.67786	3.32682	2.76305	44.5164	48.5124	94.4264	98.9712	102.438	97.3021	22.9692	26.7847	25.0277	34.5574	295.082	273.145	4.33279	5.01527	781.111	754.301	249.036	278.973	107.62	118.411
RchiOBHmChr2g0170871	10.5013	8.13201	9.57445	5.26841	4.48462	4.78134	35.1433	34.4184	29.876	29.932	48.9208	47.0154	8.09182	8.5005	16.976	19.424	44.7812	36.0708	8.56654	8.92571	6.28807	5.66211	37.8663	31.6388	29.3813	30.3481
RchiOBHmChr1g0367801	55.2251	53.0486	54.0433	29.3046	26.6282	27.7832	114.882	120.822	123.93	127.957	380.956	357.125	270.306	277.081	612.574	528.234	183.787	198.436	220.67	225.146	274.877	257.185	195.223	189.476	197.74	194.911
RchiOBHmChr2g0092621	2.957	2.26893	2.9042	1.64285	1.39413	1.12741	50.3443	44.6222	72.3073	72.3522	67.0669	65.096	5.24806	3.05865	27.6672	37.5342	89.7138	77.6323	55.1807	56.718	25.8334	19.8964	67.8849	55.9422	120.208	105.461
RchiOBHmChr1g0350191	3.94223	3.33782	3.89709	1.72351	2.47818	1.54796	5.64963	6.68389	5.83646	8.05085	8.53562	10.8038	6.71189	6.6945	0.621989	0.60766	3.64345	3.60158	6.18615	6.0185	12.8962	14.2376	6.0831	4.32907	2.28124	1.68477
RchiOBHmChr6g0305501	11.9137	10.2899	8.42255	5.85913	4.48792	5.47818	31.6138	30.9219	48.6252	46.2888	56.8262	56.898	29.8098	31.8277	22.0894	17.6976	46.7443	74.3508	57.9277	57.0991	44.9074	45.6111	48.5016	53.6099	522.234	503.927
RchiOBHmChr5g0035491	4.43844	4.10791	3.62067	2.31323	1.73531	2.2453	39.8679	38.0095	52.172	52.4508	51.7396	55.6373	5.31603	11.9242	6.04956	2.21522	8.44115	6.29122	11.6704	4.86389	26.4852	36.3237	26.3884	18.2469	13.242	9.15583
RchiOBHmChr2g0161141	6.47136	8.369	7.85271	3.83387	4.1972	3.67617	118.773	115.487	99.8952	98.2613	52.2753	54.0646	16.4828	19.0617	67.9098	69.8347	49.4243	50.2983	49.9865	46.7642	24.3054	29.6155	72.5353	64.8288	61.4996	73.3992
RchiOBHmChr4g0436961	2.40466	4.0257	3.07545	1.44809	1.80365	1.66694	2.52825	3.48393	3.70386	3.45989	3.74353	3.25756	5.01001	4.81102	1.20028	2.16681	1.87915	2.4253	1.21242	1.5742	0.818627	0.843618	0.679852	0.931355	0.846575	1.24176
RchiOBHmChr1g0331561	4.46474	4.20442	4.35538	2.36126	2.13129	2.24698	124.645	122.616	179.5	182.186	235.418	240.6	34.5039	31.0987	48.279	47.2122	382.122	386.859	120.296	134.476	186.441	200.079	247.065	220.864	144.937	136.604
RchiOBHmChr4g0413981	2.87445	2.92083	3.50754	2.09019	1.37544	1.30858	33.0034	25.5493	35.5972	33.3254	27.8273	28.888	5.07559	6.38322	0	0	0	0	0	0	0	0	0	0	0	0
RchiOBHmChr2g0165601	236.613	214.106	205.616	116.156	108.996	115.025	93.9438	93.7856	66.0525	69.191	712.391	742.993	320.098	313.128	88.1275	130.324	13.6966	17.5154	9.56292	8.182	115.093	64.7698	238.484	264.253	5.18774	5.87208
RchiOBHmChr7g0183691	15.9466	10.7648	11.4699	7.25477	6.36633	6.15839	485.844	480.311	334.617	337.126	225.495	228.068	11.4883	12.2661	220.907	255.372	2949.08	2283.31	393.593	351.853	144.593	147.02	769.254	698.627	474.009	528.344
RchiOBHmChr3g0455191	10.0555	15.4094	10.2416	6.58758	6.31621	5.57651	35.4589	34.0093	79.691	82.0315	142.657	141.241	118.239	121.457	204.023	162.82	181.186	243.137	206.363	211.424	142.718	117.135	1060.32	1005.35	239.438	224.695
RchiOBHmChr5g0036601	2.01935	1.78282	1.76008	1.03045	0.966269	0.882526	11.5713	13.614	14.502	11.8268	15.4956	12.4853	4.94801	4.73325	5.54796	5.7156	16.5141	13.4853	20.0743	22.4444	5.99513	8.11045	19.8552	22.0407	12.9462	9.96857
RchiOBHmChr1g0368301	54.2832	49.0171	38.7907	24.5257	24.7057	24.6396	166.047	167.203	228.732	227.786	219.046	219.166	146.841	152.151	822.498	502.234	350.953	338.921	183.343	179.931	360.757	375.026	266.198	280.012	419.92	441.48
RchiOBHmChr3g0460501	5.91359	8.14716	6.56246	3.78277	3.72942	3.18077	100.266	99.6997	94.1536	92.6457	79.2719	73.6044	143.741	145.728	92.4987	80.6821	316.415	325.118	528.053	527.715	201.448	197.659	172.242	147.276	410.184	436.205
RchiOBHmChr1g0377381	11.8906	7.67129	10.6543	5.12095	5.23348	5.38136	55.6048	62.3993	121.249	108.824	237.068	230.827	7.82812	8.78673	43.3294	45.3686	113.326	116.968	94.9281	92.4908	114.52	100.96	231.865	259.624	44.951	42.8607
RchiOBHmChr3g0477711	14.3747	16.0825	13.2897	7.70159	6.84334	8.25567	3.61648	1.66256	2.05085	2.14611	1.67104	2.04929	3.75204	3.9015	1.26939	3.00233	0	0.069605	0	0	0.302714	0.104656	0.0544695	0.759766	0.474792	0.0723561
RchiOBHmChr7g0223671	3.85292	2.51606	2.69828	1.54151	1.54598	1.65027	2.12743	2.82274	4.18866	4.11839	12.0328	11.4015	0.514185	0.847157	0.900207	0.0477972	0.867299	1.30314	1.6321	0.787102	1.13348	0.898045	4.54651	5.37646	1.16404	1.35465
RchiOBHmChr7g0195191	4.75423	9.48025	5.5415	4.74991	2.25143	3.27402	5.15251	5.75484	9.76701	9.55889	2.99971	2.28694	0.673221	1.62642	59.3043	73.5523	86.191	84.5217	137.6	117.157	11.6926	5.55837	106.972	106.513	360.809	372.716
RchiOBHmChr5g0008631	4.80157	4.38206	5.70891	2.82155	2.31095	2.62398	1190.24	1172.58	828.161	813.902	238.783	238.393	5.64692	6.50877	6.92043	15.1644	728.154	669.758	18.2656	17.5551	14.4077	16.7365	392.475	441.319	49.0047	72.5605
RchiOBHmChr5g0036931	11.4737	11.5932	12.5429	6.29619	6.49778	5.71538	0.919247	1.67432	0.36135	0.194108	16.8579	18.3603	2.32573	1.89691	8.98366	8.27319	63.855	57.2895	28.3079	24.5534	127.276	134.55	24.1403	25.0331	165.814	167.115
RchiOBHmChr2g0154091	19.5876	23.6774	21.8734	10.7591	11.8404	11.3497	0.0346145	0.0285497	0.0870831	0	10.4318	9.54928	62.0481	62.4659	0	0	0	0	0	0	0	0	0	0	0	0
RchiOBHmChr7g0229421	6.40447	6.7717	7.11824	3.29728	3.84942	3.42711	14.8189	15.1824	12.613	14.0602	18.9177	17.7324	19.1005	18.5891	25.5163	13.8317	9.38211	11.4005	8.42863	7.94373	17.8923	17.9612	13.9252	11.8257	8.74254	13.0362
RchiOBHmChr1g0339651	0.633559	0.648178	0.515734	0.21661	0.438097	0.283425	0.929319	0.707531	0.861755	1.08684	0.938561	0.831431	1.51822	1.55194	2.66694	3.3246	2.3125	2.88152	3.9643	4.82143	2.36036	1.99803	3.88594	3.14093	6.31103	5.42373
RchiOBHmChr4g0440111	46.6892	48.6833	41.9079	22.7618	25.2328	23.6293	0.195114	0.764406	6.28923	7.69856	221.564	216.772	27.4077	27.8309	30.3825	52.6805	0.0914744	1.2599	2.26239	1.6142	2.14192	0.12916	21.0631	20.7623	1.33933	2.0836
RchiOBHmChr4g0433131	5.23435	4.48834	4.54105	2.61892	2.82897	1.94701	16.6018	17.3167	12.2537	9.69887	5.04918	4.95574	0.492779	0.78182	103.042	68.6309	34.0711	36.2342	12.4909	10.0106	0.735513	0.603929	4.33433	4.87877	5.60326	5.93343
RchiOBHmChr3g0468121	10.9454	11.9961	9.9713	6.00619	7.01816	4.08633	1.53225	1.67145	24.3414	23.9755	167.714	159.31	64.802	64.4502	11.2083	7.76455	20.3921	15.7841	2.442	3.36482	102.161	99.0748	105.854	113.111	36.643	31.7302
RchiOBHmChr4g0428691	1.08736	0.821501	0.994672	0.428956	0.583638	0.510246	1.26465	0.716135	0.261176	0.341633	0.19098	0.553961	0.50042	0.755526	0	0	0	0	0	0	0	0	0	0	0	0
RchiOBHmChr7g0186081	24.821	35.0803	28.0617	16.2933	14.7866	14.89	85.2523	87.1765	27.2201	34.8754	23.5764	27.8002	328.187	322.975	349.236	189.138	278.454	278.056	178.934	153.707	314.922	299.641	181.228	179.366	162.1	159.519
RchiOBHmChr1g0345971	2.35196	3.20248	4.29527	1.80928	1.50807	1.8365	0.902285	0.744194	0.834546	0.461106	0.402763	0.36346	2.29227	2.10646	19.5255	39.9604	21.3498	24.2709	12.0141	11.4417	1.95121	0.726114	11.1912	11.2228	46.5128	46.7034
RchiOBHmChr5g0051591	19.1606	21.3848	19.1275	11.0096	9.68194	10.514	39.6902	40.3595	50.3822	58.388	82.3864	73.9921	99.0419	101.437	80.2538	61.0607	51.1502	68.514	41.4808	47.6371	81.8028	87.8193	64.4388	72.3304	102.22	60.605
RchiOBHmChr1g0352501	31.3226	29.2763	31.4948	15.1364	13.2543	20.1204	0.49814	0	1.64485	0.721284	44.0114	43.7776	2.1301	1.52078	0	0	0	0	0	0	0	0	0	0	0	0
RchiOBHmChr3g0488991	3.74711	3.9567	3.95476	2.18634	2.26384	1.61515	0.0506631	0.0835726	0.0318645	0.0733578	1.83074	1.1895	3.3796	2.16538	0	0	0	0	0	0	0	0	0	0	0	0
RchiOBHmChr5g0042111	2.12605	1.31264	1.4649	0.908608	0.959713	0.689868	10.4572	8.49878	9.36831	6.75832	13.8617	12.4092	0.654384	0.969	3.57446	6.0627	5.0222	2.75489	2.4688	2.21861	1.56275	1.53081	7.73293	4.80945	4.14352	3.92213
RchiOBHmChr5g0017641	8.82954	9.65806	8.22258	4.68862	4.28732	5.04627	7.97079	8.4019	44.9942	50.7867	23.9746	22.0449	6.56223	5.76661	31.9309	29.3618	310.582	472.368	68.3628	54.5371	13.7801	14.5084	43.8174	55.4632	13.0921	14.3699
RchiOBHmChr7g0177871	15.8461	19.1479	14.5643	8.18955	7.91495	9.94134	24.2342	23.8789	17.6855	15.67	31.2852	26.8447	66.7649	64.8232	18.0041	14.0524	28.3607	22.9136	33.3881	27.1987	30.604	31.7582	32.378	42.2496	31.4291	29.125
RchiOBHmChr2g0162261	10.2463	8.45399	8.71957	4.90444	4.36563	5.13009	89.5521	82.5428	21.5822	20.6303	57.2991	57.9024	10.5385	11.8432	267.752	206.946	29.9286	26.6236	20.837	21.5623	12.9332	12.5756	48.9803	58.4347	0.293702	1.04437
RchiOBHmChr1g0358861	6.9563	10.9699	10.2567	4.33298	6.18757	4.22636	0.0635093	0.235718	0.0998602	0.0919585	1.58351	2.09171	21.1555	19.9921	3.4304	1.96908	1.90559	1.71494	1.05658	0.480384	21.2725	21.9176	3.23838	3.57526	0	0
RchiOBHmChr4g0432621	4.08042	3.4588	3.93032	1.6629	2.14295	2.24761	7.61182	8.63244	8.37803	7.52812	14.5879	14.4054	0.523108	0.876046	1.32287	2.7393	25.8725	15.7188	0	0.321293	0.347014	0.479887	7.61776	7.02982	7.54207	6.22086
RchiOBHmChr7g0182231	1.13272	1.64347	1.32296	0.629313	0.640848	0.898286	6.34474	6.86621	8.98536	9.71098	10.5711	8.94243	3.13188	3.43778	1.67841	1.27624	2.53538	3.29956	2.01793	1.08706	4.56587	4.41615	2.56251	2.45563	0.633314	0.571661
RchiOBHmChr1g0370091	7.2504	13.7061	9.35582	6.07857	4.15434	5.67153	0.156433	0.451585	2.90246	2.54822	1.75237	2.29554	6.75615	9.71076	10.0482	14.5505	15.2547	13.8663	172.555	140.586	62.142	44.4594	75.0953	81.2626	468.809	484.551
RchiOBHmChr3g0461981	2.58476	2.1636	2.33952	1.33101	1.38844	0.982254	0.280888	0.221815	0.60141	0.627376	3.01479	3.07918	1.23689	0.863611	0	0	0	0	0	0	0	0	0	0	0	0
RchiOBHmChr4g0427711	0.653348	0.446221	0.496985	0.200038	0.303435	0.345023	3.2976	2.23025	8.37904	7.87837	4.43278	3.69912	6.59921	5.41397	8.9219	6.20261	5.5656	3.01979	0	0.74829	10.5739	14.2617	4.12035	5.97665	216.776	230.284
RchiOBHmChr2g0088351	16.0113	20.746	33.4536	12.4814	11.8902	12.5341	21.1859	23.4265	26.6131	24.2291	27.8885	28.9629	311.053	308.192	132.492	195.855	42.0221	38.2664	26.819	27.1853	29.2427	23.0659	30.7475	33.1384	105.075	110.67
RchiOBHmChr5g0049701	13.3794	13.816	14.0731	8.44328	6.60272	6.55995	13.2622	7.68022	4.79177	5.31148	25.4913	25.5802	15.2033	19.1434	3.29544	0	4.76246	3.97541	6.82826	7.47027	12.9669	17.6829	13.4809	9.29854	6.13365	11.3645
RchiOBHmChr2g0120101	14.713	15.3922	19.4812	8.77031	8.18303	9.16631	12.4802	13.8542	11.1077	11.2516	26.3214	31.3804	41.3509	40.6839	2.97924	1.21681	49.826	44.9707	59.1192	56.1802	1102.7	1055.54	7.49992	14.298	2.51439	0.766363
RchiOBHmChr6g0303601	1.95422	2.23847	1.36509	1.31869	0.79204	0.794752	50.6982	55.2218	48.8279	52.4508	23.7183	24.9374	9.59839	12.3402	18.3051	8.55935	55.303	60.7942	29.6563	26.4924	13.5952	11.4773	56.5348	59.2316	30.9048	36.6524
RchiOBHmChr6g0294011	552.632	663.677	530.796	292.173	347.517	280.544	599.787	593.81	475.525	471.049	877.185	919.175	1725.63	1717.28	411.075	357.933	994.691	1031.46	1898.9	1854.32	1517.73	1524.74	2030.35	2379.22	199.641	225.44
RchiOBHmChr5g0021251	2.11087	2.87126	2.14789	1.278	1.28548	1.18039	9.42254	10.5326	8.15646	8.07834	4.64141	5.82182	9.94572	10.8504	3.23374	3.74147	9.99757	10.3056	12.8008	14.1137	11.1415	10.7022	13.8967	14.8215	5.53182	5.44723
RchiOBHmChr6g0286581	2.76241	2.88794	2.87737	1.58405	1.56616	1.32252	16.2606	18.2884	12.6816	13.8271	12.7346	14.8855	25.0315	24.8311	3.45278	3.2388	7.76198	8.81639	18.78	17.1075	28.3193	25.6249	22.5992	24.0315	28.8178	27.711
RchiOBHmChr1g0370391	82.8682	87.0175	93.4164	44.0137	44.59	50.2751	0.0512454	0.338133	2.86854	2.81964	283.286	277.9	115.614	123.281	2.6433	10.6982	54.5372	54.3885	43.7126	46.1752	840.493	877.023	134.089	171.591	136.72	127.649
RchiOBHmChr2g0171021	23.4867	29.1072	28.2551	13.4257	15.4524	13.7181	23.6369	24.8052	30.5185	28.8688	57.1507	62.2895	54.3993	52.019	0	0	0	0	0	0	0	0	0	0	0	0
RchiOBHmChr5g0067781	13.8548	12.43	14.3147	6.44491	8.71786	6.20885	37.0025	45.2578	49.8944	57.0409	101.229	94.5878	44.4579	48.86	39.3496	25.2768	25.3869	20.7677	20.4744	18.5169	19.4463	19.3567	23.4656	19.166	28.6006	33.5943
RchiOBHmChr7g0195031	17.6733	17.9183	13.2427	8.36957	9.70865	7.64076	7.99449	9.17447	9.62312	8.84432	18.9669	17.8874	18.6163	16.8906	2.82661	2.22801	2.16178	2.39041	3.65297	3.32643	3.86791	3.55451	22.8876	26.6952	2.96309	3.39845
RchiOBHmChr4g0415361	4.21767	4.60817	4.99675	2.23889	2.42806	2.65415	1.40263	1.40477	0.913688	0.181334	0.905086	0.718752	27.4185	25.8626	3.46145	2.74388	1.92579	2.35249	0.909156	1.32618	1.58581	1.50329	2.85347	1.69661	7.7942	4.52413
RchiOBHmChr7g0230491	11.0846	7.46548	7.96464	6.94248	3.19871	3.78902	3.66145	3.10874	3.86068	3.11859	35.3342	38.6988	19.0644	17.9726	1.04807	4.11795	0.100975	0	0.108581	0	2.41937	0.85545	4.25441	6.50599	0	0
RchiOBHmChr7g0182421	6.30526	5.81892	5.49259	3.09452	2.90241	3.31699	52.4728	51.2487	49.4079	53.0652	43.3813	45.6095	35.8798	34.0015	42.2889	26.6409	47.7389	51.8404	43.7503	47.4735	43.0301	47.5555	63.7734	64.0984	53.6299	52.5458
RchiOBHmChr5g0024871	0.924115	1.43769	0.966336	0.526583	0.726152	0.495405	26.0176	22.6569	23.7512	26.7912	29.8935	27.0999	15.878	17.2654	3.81045	4.50323	13.0859	16.6074	9.74188	8.17996	8.06095	4.40327	30.4017	28.9025	7.87489	4.47009
RchiOBHmChr5g0064821	4.72418	5.59579	3.97822	2.55271	2.45771	2.53959	4.80742	5.35416	26.269	28.7526	25.6485	26.3608	4.11142	4.42482	22.7976	15.0635	50.0727	53.5293	45.3232	33.6419	10.8505	7.54042	39.0481	46.2199	29.4967	25.3
RchiOBHmChr6g0292191	28.7108	24.0214	26.8625	14.9949	14.3595	12.6342	78.4339	84.4393	34.3586	37.2585	145.89	134.884	32.4801	29.4998	0	0	0	0	0	0	0	0	0	0	0	0
RchiOBHmChr5g0045541	2.62612	2.11931	2.87414	1.45038	1.0667	1.52807	4.0116	4.88789	4.18604	4.09244	4.71126	4.90559	1.32554	2.07211	4.65843	5.84201	5.38577	7.01117	15.4898	14.4822	2.88625	3.7017	7.99956	7.34418	3.65075	3.56069
RchiOBHmChr6g0278481	36.5724	36.0182	28.9969	16.2425	18.6464	18.8796	39.9014	41.0438	42.8951	41.2467	44.7382	39.886	60.6305	63.22	22.7031	27.7915	45.0673	52.7321	47.9189	42.2712	44.6397	43.4101	66.3524	60.1914	38.3494	37.8253
RchiOBHmChr4g0393211	8.84151	12.5313	8.30769	6.85494	4.50049	4.24803	3.02373	3.29491	2.20717	2.62054	2.79143	2.30311	11.3065	11.0355	0.945128	1.32299	2.0695	2.79853	0.0222538	0.333891	0.405697	0.759742	1.19639	0.868734	1.16153	1.58925
RchiOBHmChr2g0155581	12.7445	9.77314	13.6729	6.1212	6.5805	6.44665	87.9213	84.9	108.122	110.645	373.859	366.111	18.2233	22.0178	62.7879	79.0754	294.901	269.72	226.879	229.986	254.891	241.023	453.463	494.284	96.0866	113.465
RchiOBHmChr5g0067771	6.76291	6.49964	7.44664	2.40854	4.84179	3.74357	8.67685	8.26205	13.488	12.5637	19.6283	25.0281	8.86856	11.0075	0	0	0	0	0	0	0	0	0	0	0	0
RchiOBHmChr3g0468431	33.7227	50.951	38.766	22.546	22.1173	20.5718	184.876	183.26	196.209	198.664	369.229	367.726	520.541	532.44	244.54	233.262	318.64	290.589	311.127	330.815	508.852	527.492	319.897	314.505	358.152	342.735
RchiOBHmChr3g0478671	93.2091	121.135	99.1947	53.8049	60.9741	50.9976	819.949	808.384	774.093	779.483	716.393	723.996	896.337	960.824	1608.85	1137.89	288.196	315.338	291.338	258.764	274.53	308.925	341.157	346.555	223.429	249.437
RchiOBHmChr5g0024901	3.27649	6.47202	2.63678	2.37823	2.25584	1.90357	36.1085	40.0764	25.4887	25.1005	8.05527	5.42677	29.1237	27.3892	154.564	74.4231	18.3494	20.0206	32.5752	29.6727	1.4162	0.680024	36.4308	40.1991	5.99381	8.77609
RchiOBHmChr2g0155851	21.6194	23.4451	23.7096	12.4449	11.1174	12.8595	34.4761	38.8275	40.3195	46.8123	188.523	172.384	183.894	179.789	74.3828	80.5623	73.4812	62.2589	100.515	108.264	111.982	116.708	66.9116	76.5509	18.0581	22.8124
RchiOBHmChr2g0099961	1.8543	1.5826	1.96885	1.00224	0.925669	0.931556	0.676906	0.659814	0.619258	0.735097	1.55657	1.83611	1.18412	1.28376	0.464144	0.397485	1.63003	1.40882	1.8614	1.49822	4.06895	3.05518	0.975264	1.57721	1.49604	1.25797
RchiOBHmChr3g0458941	612.834	480.375	443.07	285.749	244.621	283.114	24202.6	24567	24508.7	25042.8	3144.18	3173.65	162.86	157.388	649.757	1563.39	2015.25	1397.64	1970.43	1529.62	205.671	159.309	15011.8	16140.8	762.819	798.039
RchiOBHmChr5g0057561	11.3632	12.7783	15.7213	5.59207	6.65615	9.03244	0	0.0801132	0	0	4.73839	6.55653	0.581485	0.0658968	0	0	0	0	0	0	0	0	0	0	0	0
RchiOBHmChr5g0056351	47.2349	47.1993	45.5259	24.7605	25.0801	24.2968	49.8675	47.2588	102.193	103.168	349.3	322.645	86.7077	82.7862	238.806	186.013	189.665	195.22	176.648	196.249	154.122	117.761	227.865	227.026	23.4251	25.7952
RchiOBHmChr6g0305781	18.1428	17.2442	18.5179	10.1048	9.17658	9.28254	341.845	355.4	335.991	334.244	91.1022	95.053	98.9994	104.635	215.298	225.471	160.531	206.183	1635.53	1604.73	409.87	396.204	186.3	206.848	599.128	515.255
RchiOBHmChr1g0379721	28.4643	30.6399	24.4565	15.8142	15.1505	13.2515	1.45794	1.16764	1.24921	0.902544	8.00182	7.8273	5.1501	4.80219	0.493535	1.09186	4.67569	1.7365	0.447397	0.679254	8.45833	13.838	179.122	344.141	72.4481	81.3598
RchiOBHmChr5g0063251	14.7887	15.9944	16.7718	7.67038	8.41871	9.21706	66.462	68.4095	8.57794	8.69583	10.3234	11.5229	15.1985	16.9984	20.5889	29.7922	40.06	38.7872	9.19369	8.27931	29.5696	30.0488	54.0373	45.7992	17.8492	23.2338
RchiOBHmChr4g0436971	3.74998	3.74473	3.47869	1.72071	2.00993	2.11903	4.049	4.33043	5.37308	4.89638	4.72704	5.36847	4.29995	5.22222	0	0	0	0	0	0	0	0	0	0	0	0
RchiOBHmChr6g0286601	26.3585	47.0304	32.4057	18.9299	16.8187	20.4317	74.4223	79.4228	67.7285	63.8972	16.262	12.8521	193.931	210.968	117.86	132.307	125.805	140.292	243.787	240.038	26.3322	23.4377	71.0078	73.4329	147.982	139.185
RchiOBHmChr5g0001291	1.59751	1.17599	1.67815	0.827987	0.881376	0.642773	3.87516	4.87339	5.16413	4.74995	7.57001	8.63295	3.18287	3.72226	3.54737	1.5068	4.24514	3.01805	3.36565	2.72076	3.76137	3.96216	5.85158	7.7968	3.07266	5.10403
RchiOBHmChr5g0056941	1.78926	1.9415	1.74148	0.934603	0.867014	1.12182	15.5902	14.7319	4.93799	4.12096	0.709269	0.80464	1.99037	1.21747	6.52214	10.1716	43.0395	40.1625	32.9088	29.8257	14.9184	14.6513	29.5744	38.5003	8.66143	6.84425
RchiOBHmChr6g0267361	34.0669	48.6349	39.7031	23.031	20.699	21.3338	256.015	277.193	210.092	222.862	279.475	281.113	732.742	699.887	139.527	119.412	138.336	148.638	116.242	118.738	179.68	155.826	225.599	211.762	55.5812	54.6195
RchiOBHmChr5g0060041	66.1866	79.8237	81.8364	39.66	39.642	41.8936	241.285	240.054	220.87	224.692	359.537	375.131	528.03	531.446	321.605	281.813	181.935	183.753	214.475	209.878	483.176	495.348	328.554	344.157	457.619	436.635
RchiOBHmChr3g0487231	222.647	374.08	298.237	161.046	159.603	155.418	0.0484603	0.0199848	0.228593	0.0350842	0.525343	0.410868	96.9383	97.8906	1.98085	1.22704	0.295353	0.199131	0	0	45.0581	41.9385	2.4265	1.55256	0.0277207	0.650576
RchiOBHmChr4g0446971	30.525	32.1	24.8482	17.3359	13.9758	15.1866	12.1974	12.8986	19.768	19.8481	43.7996	39.9494	16.6773	14.7083	0.707041	0.395167	5.05518	4.66867	4.97333	7.77276	39.1637	19.0004	3.96964	5.49504	32.3272	27.0192
RchiOBHmChr3g0474111	2.01164	1.84339	2.51813	1.21265	1.15808	1.00756	8.92625	8.7796	4.38324	4.35434	10.5219	11.4252	7.51145	7.70739	9.80223	9.32383	13.9644	11.6567	5.00544	3.4752	6.77562	9.10038	15.5249	19.0506	4.75111	4.13623
RchiOBHmChr3g0476321	4.33018	7.41841	3.72412	3.22001	2.42944	2.56229	2.02652	2.1749	7.23286	7.2474	0.758765	1.28982	3.17392	3.51166	17.8455	20.3887	105.723	89.2066	102.141	88.3242	43.0598	41.9798	37.2598	40.5644	268.523	285.021
RchiOBHmChr2g0154081	4.92154	8.05617	6.32045	2.9246	4.24293	3.08806	0.661084	0.523444	0.698524	0.574332	1.77732	1.7246	3.05302	3.71356	1.02942	1.20247	0.694251	1.4281	0.853195	0.550048	1.4852	1.37704	0.777435	1.47653	2.20845	1.775
RchiOBHmChr7g0233441	20.0623	15.8919	17.7584	9.86376	9.51513	9.24581	447.393	480.803	658.581	677.132	963.947	942.729	69.1853	65.697	62.2856	88.561	1013.41	1072.19	1278.13	1352.32	164	153.912	140.391	132.085	141.501	152.997
RchiOBHmChr2g0134651	15.43	12.989	15.034	7.18908	8.40639	7.57941	68.9679	72.7184	81.261	86.3586	110.735	110.076	26.5345	22.0986	0	0	0	0	0	0	0	0	0	0	0	0
RchiOBHmChr4g0426631	6.05203	9.51567	8.10287	3.87071	4.59961	4.14381	1.32614	1.40629	3.61432	5.21194	5.9787	5.68356	125.08	115.931	124.946	45.4891	19.9545	25.6525	16.8732	15.7628	58.0388	62.0359	12.1259	18.4976	53.7515	72.3692
RchiOBHmChr2g0155621	28.2887	28.9245	25.773	13.3767	16.4349	14.4735	7.36194	7.51575	9.97293	11.7034	41.746	40.6605	28.3544	28.8845	154.571	76.1912	82.5456	96.3449	45.2642	53.3492	112.454	102.012	38.5961	32.3278	45.9409	38.4527
RchiOBHmChr2g0174041	69.2477	58.5564	58.8374	34.5371	32.189	32.9741	258.886	249.701	409.926	407.088	842.494	821.733	412.049	397.498	87.249	109.899	144.562	133.05	135.162	141.784	237.916	231.903	340.586	376.723	117.314	129.338
RchiOBHmChr2g0176531	39.0408	40.2085	33.6633	19.5872	20.4098	20.3378	11.4737	14.7358	8.35037	10.502	72.0235	64.0331	74.1549	78.6746	118.365	157.795	45.8766	38.6799	42.2258	35.2572	39.0003	35.0106	66.0347	71.343	3.18789	5.00108
RchiOBHmChr6g0267351	27.7953	39.3441	29.828	17.5747	17.2159	16.9861	26.2724	29.4798	22.401	23.1463	25.256	27.4371	62.676	61.602	21.8989	13.9009	21.2948	26.7618	14.7448	14.8568	27.257	23.3737	34.6475	29.8022	6.2799	5.21617
RchiOBHmChr2g0171311	34.5626	33.0697	36.2963	17.6482	17.5682	20.4253	79.2088	79.6726	71.2128	70.3754	93.5819	90.4876	18.6216	16.7142	0	0	0	0	0	0	0	0	0	0	0	0
RchiOBHmChr5g0009211	106.53	123.825	108.97	60.3502	68.5745	52.3986	1098.94	1083.62	1052.19	1078.6	1332.53	1321.11	1128.24	1127.43	542.843	258.751	80.165	86.1606	90.0376	94.8458	45.1712	40.5081	92.5239	89.5826	111.463	110.104
RchiOBHmChr2g0156971	4.27013	7.6253	3.32487	2.53055	3.54329	2.01446	0.0321207	0	0	0	0.301782	0.418974	7.27963	8.80378	4.34525	7.83433	28.3109	24.2859	5.05232	2.49035	4.26417	3.45878	2.4494	3.79289	27.5977	31.4397
RchiOBHmChr1g0332921	10.3812	9.96958	8.28823	4.19585	6.67764	4.41825	0.0454007	0.18723	0	0.164345	1.47653	1.33244	1.8249	1.81726	19.4857	25.1966	16.2618	10.394	0	0	4.03356	4.48807	23.5672	26.722	3.73976	5.31928
RchiOBHmChr4g0430871	4.12822	4.38803	3.27003	2.07232	1.79185	2.47836	14.3462	14.3811	19.573	27.1642	18.9817	18.4249	13.4017	10.3318	43.1752	37.1805	54.2208	31.0948	0	0	604.038	644.417	26.7666	26.4661	4.04009	8.35032
RchiOBHmChr4g0396821	8.54958	8.51046	11.2858	4.87176	4.72082	5.63836	10.9938	10.6087	0.109321	0.188757	3.79995	4.36435	16.0914	18.5135	0	0	0.0407445	0	0	0	23.341	29.9158	0.0399231	0.71597	0	0
RchiOBHmChr2g0158601	14.0153	19.5999	17.6601	9.16493	8.9961	9.27077	25.8641	24.5146	16.8964	15.0007	10.1207	16.5887	15.3982	19.5828	0	0	0	0	0	0	0	0	0	0	0	0
RchiOBHmChr6g0252081	9.70288	7.53478	9.55753	4.99603	4.71239	4.63538	14.1362	13.127	11.9375	12.0951	28.6132	25.9821	4.1426	3.72215	2.83815	3.26929	6.25667	6.38329	6.67812	4.15929	6.41029	6.50029	14.1684	12.5779	11.1399	7.72141
RchiOBHmChr4g0428031	10.068	16.7213	10.0961	6.45412	8.2503	4.97191	11.4617	15.7807	10.4443	12.9371	14.8713	16.4219	369.788	364.797	243.651	443.043	17.517	13.0328	35.307	26.1114	1.84325	2.31006	13.2667	16.0267	0.103251	0
RchiOBHmChr5g0079901	2.36444	2.31244	3.00225	1.29175	1.70087	1.10037	107.519	109.444	78.0186	85.4239	59.0256	59.5322	4.51958	4.30232	57.0429	28.8971	43.9661	54.2607	32.4551	29.7983	11.4802	12.8908	69.5632	59.9841	17.8082	16.3001
RchiOBHmChr7g0206551	9.41405	10.6886	9.75349	5.09521	5.0681	5.88193	19.4616	19.2803	17.1412	16.3649	16.8277	15.3294	6.16096	6.88217	0	0	0	0	0	0	0	0	0	0	0	0
RchiOBHmChr1g0315631	2.14351	2.01763	1.72751	1.21407	1.09583	0.819221	19.8408	20.215	18.6449	16.0542	22.4367	23.5202	14.2733	14.094	40.096	22.4352	19.5887	26.1715	16.5925	16.8835	14.3021	12.6705	24.3407	16.1318	44.0629	53.5571
RchiOBHmChr2g0175791	13.9479	10.8185	12.8454	6.48267	6.34924	7.40273	17.5955	18.231	25.2052	27.1094	91.4137	95.8472	8.30051	8.28384	0	0	0	0	0	0	0	0	0	0	0	0
RchiOBHmChr6g0283511	2.72083	2.58343	2.43617	1.44048	1.30193	1.41205	1.7641	1.52114	1.91645	1.27716	1.85445	1.412	10.6294	12.5121	8.35023	19.4748	238.492	206.642	11.319	9.24955	23.6649	25.125	12.5977	10.7898	82.197	83.5749
RchiOBHmChr4g0433121	13.3114	14.9506	14.1337	7.77718	9.05636	5.75618	5.3234	4.46909	12.6154	11.1147	15.8014	14.1354	1.66661	2.35395	43.3437	52.5606	36.3666	42.9681	0	0	3.4947	1.84588	88.3851	80.1848	39.9131	43.9703
RchiOBHmChr2g0143921	1.58769	1.42902	1.8761	0.853631	0.555372	1.24972	8.32688	8.22719	9.00141	10.2358	13.2269	11.3139	4.30247	4.47227	3.96757	2.51	5.44913	6.11007	4.46029	4.01854	6.55465	3.29199	7.73001	8.49552	5.16016	8.78634
RchiOBHmChr6g0303041	253.458	225.05	215.732	120.501	120.958	131.328	81.5478	85.9568	135.934	134.762	192.945	194.903	107.838	112.235	27.3482	39.6055	77.9135	83.5627	166.044	154.136	280.488	245.126	145.859	159.996	128.81	121.713
RchiOBHmChr3g0483301	2.70832	3.24543	2.11888	1.43767	1.37097	1.53041	0.160835	0.26531	0.303471	0.279458	0.46495	0.272726	0	0	0	0	0	0	0	0	3.02208	3.47797	0	0	0.128803	0.21592
RchiOBHmChr2g0131261	2.2453	3.63607	2.03342	1.33587	1.28691	1.63827	1.31639	1.63886	1.14038	1.33066	1.66939	1.47409	2.19851	2.01363	0	0	0	0	0	0	0	0	0	0	0	0
RchiOBHmChr6g0279461	12.2277	9.70895	12.1113	5.92747	6.17676	6.20183	188	195.941	143.026	145.748	101.012	103.924	4.09125	4.48346	98.7794	120.441	152.51	144.233	76.8274	78.3387	24.5772	22.2001	185.095	175.204	52.981	54.4118
RchiOBHmChr4g0445091	649.584	577.891	645.455	334.685	340.333	331.298	123.951	128.147	1034.97	1036.07	4318.32	4268.92	692.204	698.515	24.8255	30.3827	51.3429	49.7961	6.33562	6.78985	994.364	1013.28	190.442	177.621	12.2381	13.1465
RchiOBHmChr1g0371351	136.357	112.517	134.694	68.0311	63.5528	74.6763	228.99	230.451	124.224	123.499	199.447	202.235	190.439	186.142	179.703	279.019	673.656	607.479	1176.1	1189.52	1466.12	1402.24	1075.34	1081.98	1421.96	1391.79
RchiOBHmChr2g0085101	3.64268	3.10561	3.43796	1.51352	1.622	2.40731	6.14452	4.83221	7.45956	5.17267	9.08799	5.96447	14.6649	11.3425	1.11256	0.886087	7.36926	5.53627	11.5263	9.32245	71.0649	79.2059	5.77656	11.1182	2.28874	5.92949
RchiOBHmChr3g0482681	2.07096	1.60219	1.974	1.22702	0.9542	0.832658	1.72496	1.99181	1.91946	2.1134	2.53165	2.63076	0.839741	1.04423	0.98144	1.56331	3.88178	3.45837	4.57554	3.13643	3.19782	2.17834	4.38869	3.59519	4.61484	5.44118
RchiOBHmChr2g0136831	10.9327	11.0343	11.5364	6.43161	5.47259	6.0929	0	0	0.0359497	0	13.5494	12.3017	3.32405	2.094	0	0	0	0	0	0	42.4347	30.7238	0.105028	0.0523209	0	0.0697587
RchiOBHmChr4g0432781	10.7872	14.4875	10.6879	6.4978	6.71497	6.08557	5.00081	5.2851	11.227	10.1128	10.1074	10.3593	5.45111	4.28973	9.94835	14.331	38.7997	37.3964	17.2632	14.6496	5.12409	2.78298	20.574	21.5069	59.7335	61.7563
RchiOBHmChr3g0462881	2.60709	3.87073	2.69195	2.18749	1.15022	1.57581	3.9132	5.00829	15.7178	15.1032	3.02316	3.46739	4.29295	3.55197	6.2511	10.9613	54.0008	42.0138	38.9391	36.1317	16.4254	15.1019	124.123	120.702	7.47185	7.08144
RchiOBHmChr3g0451721	5.72309	5.0266	5.43741	2.85297	2.81682	3.05891	13.6485	14.396	16.0001	16.7925	34.1416	35.37	1.75419	1.81165	0	0	0	0	0	0	0	0	0	0	0	0
RchiOBHmChr1g0320231	2.33236	1.30155	1.99087	0.781786	1.229	1.03223	9.34192	7.12058	5.42986	6.48347	12.9909	10.0424	2.81007	2.36029	1.00324	0.599261	3.26215	4.91661	6.7559	5.056	15.8559	12.3966	5.50489	4.01026	0.737083	0.707668
RchiOBHmChr6g0294251	2.69347	4.20275	2.49891	1.89988	1.43016	1.72285	81.073	92.0758	35.1622	37.2407	24.5494	22.4134	23.5279	23.7052	59.8334	57.8699	60.1345	57.3799	115.682	126.67	33.9655	32.6752	58.2314	61.3369	124.884	111.415
RchiOBHmChr2g0163861	18.9354	16.8678	17.0192	10.1232	9.34538	8.9714	115.888	118.393	121.696	117.246	133.899	128.374	96.5004	91.2407	64.6061	61.537	82.5925	89.3759	106.974	96.3114	240.757	239.362	125.505	130.224	46.446	46.0638
RchiOBHmChr4g0422011	9.04763	10.9256	8.25218	4.84284	4.50343	5.93552	3.84918	4.37564	4.54715	4.15584	3.79783	3.15435	18.5491	17.871	53.6348	66.3301	37.9592	47.5488	48.4288	48.6888	66.9935	73.0293	95.8988	103.404	193.15	201.021
RchiOBHmChr7g0194931	123.943	153.657	133.615	72.0029	75.6639	74.3212	1031.89	1032.58	1077.01	1139.6	1296.64	1279.14	2629.04	2554.7	2567.36	2134.63	1035.88	1066.98	1033.07	1154.47	3004.37	3046.4	1261.32	1303.19	1904.64	1810.51
RchiOBHmChr5g0011511	39.3837	62.3743	44.0584	25.4864	27.9538	25.2343	19.6177	20.3108	40.4099	39.2468	23.5597	24.6059	57.0684	58.91	4.56612	7.08483	56.0727	47.2057	114.392	111.958	2.25903	2.2529	58.2255	56.6092	99.7596	91.0522
RchiOBHmChr1g0347271	1.3155	2.18897	2.10785	0.838195	1.44342	0.72954	6.69292	6.76675	7.36664	6.99475	11.0394	8.37805	9.32447	11.1686	0	0	0	0	0	0	0	0	0	0	0	0
RchiOBHmChr5g0062881	7.24434	6.50815	9.09728	4.17386	3.50824	4.69204	10.9036	10.3921	22.9355	20.9628	38.9046	38.0052	36.5746	34.3014	25.075	22.1201	3.71085	5.31016	3.09457	2.71097	139.678	136.052	16.1025	17.0043	45	43.0267
RchiOBHmChr6g0302121	3.96026	4.95371	3.74475	2.09485	2.71968	2.00563	21.0252	23.2959	41.6628	49.2414	6.22452	6.44315	33.6877	32.6526	0.739602	2.61798	3.91911	5.65066	6.00221	6.22725	210.568	247.06	12.684	9.62288	9.27385	4.48279
RchiOBHmChr2g0153481	3.4467	4.24686	4.45009	2.074	1.74201	2.79223	0.839438	1.11547	1.61322	1.48557	8.19008	9.03327	2.99128	4.33451	198.704	217.176	89.6858	83.8801	24.6394	27.735	66.6255	69.7282	368.093	422.275	143.148	136.542
RchiOBHmChr7g0234871	1.69729	3.10668	2.28271	1.68285	1.02428	1.10442	101.767	97.5256	33.6794	33.8562	17.1612	13.2742	72.942	64.3563	18.5115	26.9197	30.2169	35.5591	13.5591	12.0275	32.5378	38.6022	45.4134	37.4833	4.57392	2.66145
RchiOBHmChr1g0372491	1.36403	1.99709	1.40158	0.915159	0.885124	0.769467	20.1825	19.1705	20.9395	20.0312	36.2263	35.5233	33.6722	33.333	6.15832	2.69278	4.53715	6.8949	14.0112	12.5523	18.2028	21.2085	16.7188	15.5972	28.1054	26.0954
RchiOBHmChr6g0246351	0.550038	0.814341	0.655529	0.39338	0.254033	0.45195	0.493965	0.386523	1.34627	0.797766	1.63851	2.00729	4.01869	3.50586	13.1649	14.3204	0.866954	1.42754	4.22709	3.60462	5.31594	6.61808	5.3296	7.00267	60.6858	57.1633
RchiOBHmChr1g0331411	13.1913	11.3477	15.73	6.55688	7.69275	7.60136	230.234	263.344	217.999	211.872	438.95	428.1	96.6907	98.1077	40.3861	68.1696	157.032	179.442	113.88	92.1977	60.0039	52.7703	149.981	143.568	109.336	120.404
RchiOBHmChr1g0377571	16.0956	18.9545	18.0536	9.44751	10.0991	9.20357	108.433	118.852	103.25	101.904	122.67	125.965	175.392	166.14	128.93	96.1024	151.688	112.537	101.465	107.341	174.471	182.559	185.788	193.266	83.4315	98.1355
RchiOBHmChr7g0205651	5.90981	5.35314	5.24423	3.31875	2.69207	2.92592	9.42245	9.88379	10.3532	10.1683	10.4649	10.8828	6.22623	6.42523	0	0	0	0	0	0	0	0	0	0	0	0
RchiOBHmChr4g0405731	58.0618	50.7128	55.8017	30.0297	29.2114	30.017	26.6484	30.4836	43.8422	39.9	188.603	189.851	58.3731	58.6706	0	0.0750432	0.340422	0.596744	1.09819	2.47155	19.0566	10.5106	13.8094	13.4262	10.4671	14.6221
RchiOBHmChr6g0274401	22.1254	21.7418	16.0196	11.0087	11.429	10.0176	110.72	112.915	94.2522	95.8747	85.8666	80.735	24.4876	23.5428	93.6709	122.509	271.579	229.971	184.753	189.692	43.7802	42.0977	280.473	284.639	404.088	355.291
RchiOBHmChr6g0280651	34.4671	38.9445	38.1178	19.1928	20.239	21.1096	145.558	143.348	56.2003	56.9642	152.367	146.37	172.549	181.8	4.68832	7.12624	119.212	118.548	42.9527	37.0631	153.465	155.986	100.06	91.3043	7.7806	10.9515
RchiOBHmChr7g0190031	64.0063	57.068	58.6022	32.9972	32.0757	32.4206	37.7675	36.4033	45.452	45.9488	173.299	166.936	46.1081	45.749	11.1465	16.0806	54.2454	51.3591	57.7682	51.8469	135.529	131.514	88.9543	100.875	47.6185	46.3318
RchiOBHmChr2g0099341	7.15953	9.1118	7.16161	4.21142	3.99947	4.51342	4.345	4.09567	2.53476	2.27948	4.1219	3.83114	37.8364	36.8745	19.4712	21.6902	15.6132	14.6277	9.12478	9.46672	23.3612	25.6145	21.3897	25.0412	30.7519	29.5225
RchiOBHmChr1g0336891	14.3988	14.1268	14.2928	7.67051	7.89368	7.6806	15.7176	14.8958	14.5907	13.9504	18.7319	19.9102	20.7446	23.941	0	0	0	0	0	0	0	0	0	0	0	0
RchiOBHmChr7g0183781	43.0256	39.3695	42.9869	22.4684	24.2738	21.3073	229.048	227.986	325.904	334.798	559.116	565.398	146.415	142.915	257.303	106.667	263.678	273.754	285.337	292.336	314.486	323.955	331.068	332.604	416.083	422.235
RchiOBHmChr6g0262181	14.5249	16.0389	16.1319	8.59161	8.16917	8.59401	44.4529	43.9899	32.5043	31.0166	29.987	26.1237	56.4113	58.6915	54.3222	54.4009	28.0869	25.8648	23.925	22.5176	35.3466	39.5429	53.3614	49.6977	28.7408	31.0317
RchiOBHmChr2g0165281	5.74734	5.50578	4.67849	2.82466	2.75485	3.097	0	0	0.0169944	0	3.08541	3.0839	0.716359	0.84324	0	0	0	0	0	0	0	0	0	0	0	0
RchiOBHmChr3g0463261	6.63724	7.32107	6.67635	3.41712	4.09913	3.69374	68.7329	73.5439	24.4669	18.1956	10.1875	14.966	12.4292	11.7132	0.53174	2.03279	20.7994	17.8325	12.34	11.5716	47.5368	51.0209	51.8037	46.2116	1.50018	0.800173
RchiOBHmChr2g0155371	154.398	143.076	147.365	73.48	88.642	79.6037	34.0568	33.7076	37.9069	37.8064	450.051	433.19	29.1262	18.4841	50.4208	21.9717	28.8369	25.2022	25.1818	19.5156	22.3426	22.5902	36.4099	29.852	28.1006	34.7631
RchiOBHmChr4g0430171	15.1021	15.6928	13.5123	7.7617	8.3478	7.98172	7.5836	8.05712	6.75611	6.54057	11.7976	10.0715	11.5109	12.7066	3.37756	4.15599	13.4468	16.9877	10.1829	11.9968	24.508	26.9199	26.2502	28.9101	14.5162	13.1323
RchiOBHmChr6g0260031	99.402	108.078	109.169	60.0083	55.2622	56.9635	156.774	164.199	154.071	155.615	553.814	531.076	212.77	216.308	114.888	97.5342	68.8085	64.8556	13.2889	10.7692	194.326	142.251	161.976	182.902	64.7816	68.8091
RchiOBHmChr5g0058211	14.3795	13.4654	15.4201	6.84567	8.15083	8.62196	109.033	106.601	84.1949	89.7246	90.1522	83.7652	87.9135	85.4899	92.8501	59.2071	58.3737	72.0055	46.2338	34.9461	49.0667	50.0549	95.8235	94.4134	50.3455	76.2611
RchiOBHmChr5g0011931	9.80633	10.8988	8.02722	5.72446	4.95915	4.94612	8.78534	7.87697	8.62606	8.81616	5.62333	6.57629	6.0266	5.69287	17.9952	20.1954	53.5408	46.5372	69.3222	64.7866	19.3633	19.157	39.9956	43.0453	116.74	112.539
RchiOBHmChr1g0351261	5.51927	5.49496	5.22758	3.16288	2.45431	3.25213	4.74142	4.20251	23.167	24.08	37.0798	37.2229	3.84314	4.68103	11.7428	24.7204	6.30375	5.60817	0.0356768	0	44.6249	49.5944	7.7696	7.51427	6.07216	6.21849
RchiOBHmChr4g0396141	50.5237	77.6138	51.0211	31.6817	34.2314	31.7002	286.3	293.244	275.433	270.491	281.303	299.343	330.332	335.989	322.126	244.184	302.837	303.444	269.302	272.833	645.473	646.113	502.481	487.937	405.111	412.1
RchiOBHmChr4g0411691	1.07327	1.14257	1.12204	0.691552	0.529368	0.59429	8.99492	9.58467	4.4802	4.22681	2.24094	2.40485	2.36513	2.27418	48.3923	35.539	11.1058	9.54374	8.2526	6.81432	8.50089	9.9363	14.0387	12.5806	16.3948	15.9212
RchiOBHmChr5g0015331	34.7994	30.6602	33.1173	16.4931	18.7333	18.6003	60.6427	62.9202	65.6723	63.6224	92.5792	95.9561	37.1694	38.1536	0.889636	1.15943	2.25967	4.3172	16.5064	15.4393	14.575	14.9261	34.7005	34.7249	61.5354	60.497
RchiOBHmChr1g0332771	13.253	9.86862	9.71517	6.22506	6.34511	5.33141	217.748	234.621	119.275	134.138	146.279	136.324	35.0895	33.7535	38.0448	19.1985	135.257	135.03	45.2785	42.9173	50.6419	21.814	153.307	178.027	23.8398	29.1773
RchiOBHmChr5g0026891	1.09598	1.44853	1.10244	0.690254	0.693492	0.598202	31.0178	35.4414	25.9654	27.181	33.7049	34.3374	17.183	16.8147	10.6334	8.56356	25.1648	27.3767	38.5203	25.4447	20.8172	22.3289	14.8214	15.1025	28.0198	29.4432
RchiOBHmChr4g0387741	4.66676	3.77702	4.72535	2.17934	2.40422	2.63947	9.89485	9.50577	9.77643	8.74785	7.77489	7.48241	0.760488	0.875343	8.11971	3.11742	5.58311	6.01831	1.48553	1.02211	1.13954	1.13882	6.93631	6.75117	8.67723	8.66077
RchiOBHmChr3g0475591	79.1886	99.3151	74.7152	50.9935	40.8183	46.5005	11.6233	11.3284	40.0516	38.499	17.7428	17.0413	20.0694	21.9749	40.2447	65.5091	226.46	188.116	386.097	366.831	103.132	83.4987	184.612	213.161	1191.84	1198.07
RchiOBHmChr6g0283461	23.9613	29.1229	27.8553	15.6313	14.4176	14.1384	20.6346	21.2693	32.1384	31.7351	32.6968	33.0149	16.8124	16.4478	60.7548	46.3346	20.2208	19.7485	31.9521	30.2416	24.5954	24.464	32.2016	33.7038	27.4249	23.2441
RchiOBHmChr7g0188891	8.08723	8.28414	7.99868	5.01863	4.07403	4.19004	13.2917	12.7155	11.688	10.0452	13.9424	13.8047	10.5121	8.50864	0	0	0	0	0	0	0	0	0	0	0	0
RchiOBHmChr6g0279141	9.90211	9.22149	9.00943	5.17075	4.87869	5.36076	181.642	160.373	120.123	122.134	184.699	179.244	30.995	24.6852	241.724	176.874	125.411	123.428	81.3499	73.9729	113.821	117.925	185.91	172.193	1812.04	1715.55
RchiOBHmChr2g0155991	13.9136	10.6965	12.2737	6.21569	6.89673	7.12863	3.8892	1.643	6.80138	7.27959	54.1588	51.967	7.54463	9.46012	5.63147	6.07818	36.5561	62.3661	87.4187	92.2	25.3796	31.5643	10.8939	11.8958	0.434095	0.694618
RchiOBHmChr5g0082521	1.37763	1.70062	1.26327	0.695802	0.984104	0.687594	23.943	19.816	15.3186	11.9546	13.4851	13.2461	11.8623	10.8664	0	0	0	0	0	0	0	0	0	0	0	0
RchiOBHmChr1g0357121	9.07957	10.5464	16.0317	6.35222	6.50036	6.68758	0	0.0312953	0.143187	0.192291	1.98811	2.19004	13.0287	12.0343	0.0184638	0	0.231255	0	0.592993	0.591945	2.05361	1.80846	0.331175	0.121563	0	0
RchiOBHmChr5g0013541	27.1933	40.9138	28.1553	17.9781	15.0166	19.7964	1.18663	0.978721	1.17281	1.1966	1.07199	1.43726	14.4252	16.9347	1.44358	4.86168	19.0342	17.1657	16.1095	14.5855	8.87195	6.80782	14.6401	18.4655	100.121	98.9963
RchiOBHmChr6g0298201	15.0965	13.7332	12.3125	7.52554	8.60583	6.3666	104.141	100.004	94.3023	91.2539	70.361	74.3038	50.1062	46.7179	32.8726	56.6941	85.1525	88.3003	65.2792	56.2202	73.34	74.1248	75.9561	70.8413	37.6448	32.2922
RchiOBHmChr1g0341931	1.31107	2.11921	1.03205	0.850125	0.916534	0.661895	0.204043	0.546951	0.304791	0.313911	0.479261	0.632104	0.894325	0.934393	0	0	0	0	0	0	0	0	0	0	0	0
RchiOBHmChr5g0065681	0.863814	0.701154	0.73652	0.514596	0.431943	0.303396	4.13357	3.06839	7.39087	6.75475	8.06593	6.8937	1.01003	0.600927	0.459761	0.488228	5.03861	4.99165	3.5724	4.32703	1.98998	3.07509	7.18853	7.27017	29.7592	30.2328
RchiOBHmChr2g0155351	95.9309	99.5652	94.5043	49.6152	54.1588	55.6628	6.20492	5.68639	4.19166	9.15082	23.0862	34.0228	1.17924	2.02684	2.68392	2.37508	1.50838	2.15847	3.0123	1.08643	3.05086	1.82555	4.64507	4.62797	1.31459	2.80473
RchiOBHmChr2g0136841	968.042	833.697	966.802	510.283	479.463	530.043	1.8258	1.26075	26.5452	21.6105	1728.68	1721.4	326.963	312.145	0.495885	1.57977	0.0796263	0.149551	3.46778	4.69712	839.454	750.624	293.945	305.222	1.26301	7.46219
RchiOBHmChr5g0053831	2.89239	2.27976	2.7414	1.57831	1.40219	1.35573	17.6177	18.2491	27.0666	28.2728	30.8619	31.2954	3.50066	4.0529	8.20964	9.4897	24.6622	22.827	27.4122	23.7703	8.0211	8.47066	32.9315	35.0381	23.573	23.9992
RchiOBHmChr6g0262341	42.5872	38.6459	45.596	23.4282	22.1535	24.2422	2.84576	2.8587	17.4165	18.5159	234.011	230.092	14.0721	12.5986	5.7877	7.01328	6.46556	8.39543	15.3398	14.7986	34.0903	29.3359	7.00562	7.247	6.38621	4.54174
RchiOBHmChr2g0146781	7.2124	14.7512	8.39077	6.2237	5.17384	5.26288	5.71883	6.20888	5.6889	5.112	4.42829	3.23498	53.0509	53.1296	744.842	606.835	47.8227	60.6329	658.64	739.62	1434.62	1312.33	150.012	161.639	432.618	433.371
RchiOBHmChr2g0142571	73.141	84.9962	66.4244	42.8421	39.609	41.0635	142.903	138.731	182.758	184.01	230.083	234.831	124.45	130.877	49.943	85.4645	28.993	58.7899	0.461392	0	62.4177	46.3323	416.458	380.577	11.6671	15.4778
RchiOBHmChr1g0350241	71.0152	91.0731	74.9971	41.87	45.3513	43.2049	230.933	201.626	238.661	236.006	499.788	489.976	659.864	626.343	140.53	94.3533	90.7706	95.57	113.518	93.8985	294.399	288.83	127.716	121.628	107.457	120.898
RchiOBHmChr5g0061421	8.11537	5.74373	7.25063	4.56794	3.52285	3.50165	133.054	144.1	125.482	124.571	165.032	146.474	28.9541	28.7343	85.5596	49.2443	71.589	89.4738	75.0148	53.6142	64.7355	71.3232	110.851	116.564	45.5868	48.2905
RchiOBHmChr7g0186891	8.32758	6.73033	8.84202	4.17255	3.35757	5.74572	61.132	56.7637	62.0815	53.7018	66.6934	68.8828	12.0713	10.8307	23.0213	30.3823	80.5043	67.8859	78.7163	75.2876	22.1677	18.8162	49.0102	43.6616	35.4148	31.7204
RchiOBHmChr4g0434181	169.689	256.453	213.469	117.785	114.378	120.159	0.074059	0.549747	4.0524	5.95149	5.99462	6.37564	485.097	487.212	0	0	0.0694415	0	0	0	246.926	253.688	55.0457	44.1998	0.0847279	0
RchiOBHmChr6g0287271	1.51742	1.31475	1.80196	0.767959	0.828378	0.974391	14.7261	19.0546	11.7261	6.35768	4.6867	8.10625	6.93251	8.98234	31.1619	14.94	9.37419	4.12399	7.08346	2.93798	4.27689	5.12752	11.5436	8.78039	24.7303	23.4136
RchiOBHmChr3g0464501	6.9694	9.27258	7.14909	4.54347	3.74995	4.61183	84.3862	79.0918	39.5088	38.6766	12.9768	13.7408	20.7284	22.7793	67.4114	58.3138	213.554	199.843	166.359	151.69	126.934	127.031	318.495	325.973	523.672	583.536
RchiOBHmChr5g0016361	49.8366	43.2701	44.6973	26.8854	22.9735	26.1696	10.8031	11.2764	15.6824	15.1412	31.4562	32.1894	18.4154	16.5187	3.47223	3.73537	25.6452	22.9987	20.1676	24.1481	27.7125	26.5667	15.7839	16.0304	1.62202	2.18524
RchiOBHmChr5g0037031	3.26514	3.97865	3.26587	1.96841	2.11204	1.69353	2.72198	3.85915	3.89393	3.77386	3.51012	3.50407	7.85094	7.86944	3.82649	4.50469	20.2346	16.7096	16.8079	18.4191	8.44798	7.41163	19.9085	18.5812	52.6752	56.0837
RchiOBHmChr2g0134641	12.6639	10.784	11.3507	6.71246	6.86233	5.56825	5.98467	7.59546	9.14753	7.7083	10.2598	10.9832	1.76559	2.14024	2.97996	4.09942	7.2428	10.4305	6.52539	4.75929	2.53461	2.51828	10.528	12.2303	6.68759	6.53961
RchiOBHmChr2g0163771	18.7727	15.5124	16.3676	9.072	9.80389	9.09543	14.1894	15.2125	11.2547	10.0222	26.3506	25.5849	6.72042	8.03815	27.6388	48.8327	55.872	55.474	19.6232	19.6717	27.7119	27.5994	66.4168	63.6566	1.88653	1.6895
RchiOBHmChr1g0361681	1.91439	1.99987	1.60986	1.17813	1.01088	0.840837	26.3959	23.9089	23.1771	24.5208	6.24439	7.24102	2.47542	1.46544	25.1006	16.5643	53.7535	59.6974	32.1029	28.1025	13.6761	11.3248	54.0591	61.255	46.6074	49.1393
RchiOBHmChr5g0069161	1.1752	1.98201	1.60828	0.915201	0.935764	0.764701	3.15296	2.7585	1.68652	1.32267	1.09675	1.13386	2.46968	1.87917	10.912	11.1308	4.13065	4.54931	2.06491	2.11744	0.752284	0.455147	6.13198	6.28473	0	0
RchiOBHmChr2g0164581	12.3131	15.6243	12.1315	7.2818	8.28425	6.52337	161.146	165.969	108.623	110.96	28.9664	31.4264	44.7404	39.616	197.154	164.138	160.459	168.925	175.573	163.292	139.651	150.049	170.947	190.929	342.445	390.318
RchiOBHmChr2g0162101	19.9521	18.8624	17.9446	11.5698	9.81255	9.92798	2.60438	2.36651	4.41434	6.2957	16.6848	20.7856	11.4009	11.6794	72.0875	70.2553	8.31937	7.51458	6.72065	6.59434	22.8994	21	6.85388	7.71759	0.505012	0.323238
RchiOBHmChr5g0073381	34.8964	32.9492	38.0576	19.1428	19.0867	20.3924	58.2953	56.4145	67.4794	64.671	169.682	143.501	62.8851	68.7078	22.0852	29.005	35.1122	36.1505	98.1522	71.1154	95.3964	80.9662	61.0733	54.9764	37.7959	35.1328
RchiOBHmChr2g0176261	29.4702	51.6364	39.1594	22.1701	24.1313	20.1536	117.56	119.654	42.9466	45.5282	56.3445	52.9503	456.542	452.585	10.0482	5.51705	9.29585	10.4686	36.1396	39.5468	37.8603	39.1954	60.5793	52.7312	15.5032	13.9609
RchiOBHmChr2g0090351	44.7881	39.0759	35.4013	22.0048	21.9516	22.0415	2.13615	1.56295	2.12364	2.12023	59.6613	58.176	15.116	15.8479	0.938887	2.10086	7.6888	6.87659	1.42431	1.82427	77.6513	79.6442	2.43741	3.34304	8.3565	7.23248
RchiOBHmChr1g0366111	3.63492	2.49798	2.9482	1.89866	1.44399	1.68358	70.7521	72.7916	70.4963	69.5079	54.8417	64.958	2.58418	1.58582	76.0712	57.9197	167.376	156.226	143.136	144.088	49.3708	46.4459	101.565	93.7279	90.0109	80.0173
RchiOBHmChr5g0033241	4.06806	3.0689	5.79915	2.51125	2.30866	2.34376	0.361258	0.175272	0.320771	0.184618	1.56651	1.9403	0.726955	1.35519	0	0	0	0	0	0	0	0	0	0	0	0
RchiOBHmChr2g0168861	2.99959	1.87546	2.01765	1.71819	0.977361	1.11131	21.1745	19.9657	19.2069	19.2201	28.7221	31.0546	2.22949	2.27391	5.22958	5.82829	7.63244	13.929	15.4491	13.129	9.18171	6.99673	19.6985	17.5806	2.5564	1.55833
RchiOBHmChr3g0471911	7.3007	8.14818	9.11268	4.71585	5.72799	3.05975	59.8953	56.4805	99.9817	104.617	137.473	129.267	2.2318	3.0076	4.89591	3.54185	11.9103	10.1142	1.90209	2.0512	1.63748	1.85931	2.5709	1.95705	2.15823	3.37675
RchiOBHmChr5g0065581	6.16828	6.24266	5.27761	3.5319	2.9138	3.36097	11.943	12.4356	12.1255	13.9575	9.67608	9.83324	4.78343	4.34452	32.5819	22.0609	16.4302	16.8608	7.81905	8.04752	8.30545	7.15468	21.3618	21.951	74.0053	71.0981
RchiOBHmChr7g0214741	10.1061	10.8812	11.3195	5.31834	5.45606	7.25296	2.30296	2.3236	1.78595	2.15291	4.03975	3.79136	1.56798	1.62306	0	0	0	0	0	0	0	0	0	0	0	0
RchiOBHmChr7g0177741	114.633	80.6998	92.7904	52.0342	51.5008	56.3828	54.0013	52.1292	55.7283	52.2945	143.683	140.51	96.7259	93.2312	58.6101	55.8097	126.627	135.777	62.9425	69.235	43.8518	26.6532	110.46	131.763	10.0332	11.0722
RchiOBHmChr2g0149151	0.830959	1.15454	1.42247	0.536312	0.639626	0.724155	11.9591	14.2038	12.9974	12.3984	16.9403	20.778	23.0736	21.614	0	0	0	0	0	0	0	0	0	0	0	0
RchiOBHmChr5g0048041	1.76781	1.73306	2.1053	1.26598	1.19388	0.612073	1.83294	2.5567	2.17002	2.73207	1.53897	1.65249	0.829889	1.18865	0	0	0	0	0	0	0	0	0	0	0	0
RchiOBHmChr6g0245521	3.47042	5.70865	5.41884	2.91783	2.76977	2.3938	2.14737	2.57235	1.99372	3.14631	3.69508	4.70164	27.9844	26.6739	0	0	0	0	0	0	0	0	0	0	0	0
RchiOBHmChr4g0439191	9.60288	8.14384	11.0732	5.79556	4.28404	5.96301	22.5248	21.1407	26.1844	31.5464	58.3235	55.5194	12.9532	12.5413	0	0	0	0	0	0	3.33133	2.53654	2.35491	1.84855	1.51064	0
RchiOBHmChr7g0203561	6.13065	6.27933	6.15232	3.3939	3.46361	3.45583	125.737	129.483	99.6088	104.796	94.5046	98.538	100.618	91.1353	113.296	73.105	71.5856	71.7578	77.0513	81.0012	128.253	126.347	140.687	136.034	87.0105	86.4187
RchiOBHmChr5g0061381	5.24633	6.38285	6.07227	3.55507	3.03057	3.22924	14.5497	19.1567	12.7611	11.5967	20.7411	18.543	11.6441	15.4856	0	0	0	0	0	0	0	0	0	0	0	0
RchiOBHmChr4g0386261	11.3823	9.61845	11.5675	6.94921	7.35964	3.57096	19.1855	19.893	24.1334	23.2821	38.5596	38.3718	14.5327	13.2639	76.1103	59.2952	24.3284	26.6005	25.2398	17.4489	31.3473	33.2223	33.4068	27.5971	30.311	27.4289
RchiOBHmChr1g0331761	7.06334	6.63296	8.12465	3.84634	3.95678	4.35517	61.5677	54.9192	53.6537	51.6299	54.6084	52.3634	51.8287	49.4945	0	0	0	0	0	0	0	0	0	0	0	0
RchiOBHmChr4g0433931	34.0562	36.0125	32.7215	19.6799	18.155	19.3409	38.7686	39.6964	50.4985	50.0409	39.5166	39.8065	23.0171	23.9811	45.1356	35.8334	83.7406	67.5737	60.2706	56.7939	50.4525	44.8807	92.1164	94.1981	133.643	137.485
RchiOBHmChr2g0161401	48.4814	61.4524	51.1642	29.6261	29.4946	30.4944	281.397	287.49	188.729	195.865	280.051	294.355	1037.4	1043.8	319.367	274.514	337.959	346.177	327.221	270.03	2008.27	1986.19	645.536	700.665	288.483	286.368
RchiOBHmChr1g0363811	72.5081	64.7991	68.2477	41.3672	35.9424	37.1527	202.685	212.657	443.81	428.292	663.702	649.206	74.7263	85.2129	123.81	118.985	70.9322	61.6974	22.2958	20.0611	121.409	85.813	125.104	140.951	12.8028	11.2538
RchiOBHmChr6g0278131	7.88201	4.52481	5.33163	3.50045	2.81377	3.59049	104.353	87.1036	112.251	121.04	299.757	254.967	23.9496	26.3713	30.6442	22.6063	103.856	96.6709	149.046	140.424	55.203	41.9331	145.54	146.279	266.188	302.836
RchiOBHmChr2g0089081	21.338	40.4574	28.3069	15.7064	18.4161	16.0489	0.056578	0.0466649	0.0355847	0.163845	0.245338	0	146.854	159.486	9.08547	21.6349	1.06101	1.5942	0.456373	0	1.03999	1.04869	1.19556	0.880425	0.906201	0.759555
RchiOBHmChr2g0098131	14.0995	19.118	13.9846	9.52415	8.34104	8.43715	22.5399	22.1723	24.7893	24.0733	26.8708	27.7821	45.698	54.3766	0	0	0	0	0	0	0	0	0	0	0	0
RchiOBHmChr2g0156501	78.9166	68.2021	76.7929	42.3954	40.1084	42.5208	201.448	200.685	237.519	248.274	403.477	402.461	103.482	103.687	283.876	279.944	258.381	292.618	250.806	266.688	252.253	234.362	216.217	230.33	183.698	166.749
RchiOBHmChr2g0155361	40.4941	36.6336	39.7757	21.1177	19.1758	25.2466	1.90785	3.39561	2.33673	2.399	14.0786	13.7525	0.858757	0.8856	1.1727	0.622655	1.88305	1.76834	0.708714	0.854466	1.12795	1.86118	2.12186	2.38979	0.689273	0.857843
RchiOBHmChr7g0177951	1.92455	2.96532	1.77219	1.31016	1.5096	0.872731	28.208	22.7428	46.1809	42.9091	35.1988	40.8591	20.7811	16.0551	368.918	290.762	338.195	263.947	78.827	76.3161	89.7618	95.2064	71.5363	67.7915	44.4793	51.4462
RchiOBHmChr5g0023111	4.15584	4.81944	7.23937	2.85837	4.133	2.02022	28.2264	29.5354	21.0594	20.8331	29.322	29.9966	5.62376	6.18851	24.4046	4.52436	4.29374	4.70958	4.54329	4.13917	0.112231	0.145504	1.14435	1.45871	4.23305	3.6662
RchiOBHmChr3g0493271	7.45376	6.35107	8.25461	4.31584	3.552	4.49811	2.98429	3.87858	4.26584	4.84489	6.43768	5.66201	4.36973	4.20263	4.18058	4.20577	4.8333	6.26417	4.87824	4.78825	9.00406	7.34334	6.35603	6.70514	2.74171	3.86291
RchiOBHmChr5g0050701	33.4384	31.5298	29.1944	18.5353	16.9258	17.1588	117.547	127.674	119.038	114.706	200.463	215.7	121.192	119.491	164.695	138.378	132.918	135.698	132.49	130.359	144.271	139.928	169.658	168.507	143.859	142.816
RchiOBHmChr7g0238441	2.83155	2.04697	3.24562	1.73266	1.63839	1.13846	24.9965	25.7673	311.565	308.305	93.4096	93.9076	0.527842	0.320201	0	0.112565	10.8084	12.0628	3.14815	3.15809	0.426364	0.0961337	38.2926	44.7484	0.0830719	0.0221546
RchiOBHmChr7g0196601	49.0619	54.0221	47.9556	26.268	28.3576	29.9291	92.6346	87.6398	102.115	100.957	237.451	216.46	285.648	291.124	45.8005	50.4282	88.8331	110.502	196.294	206.904	232.194	231.076	171.923	162.334	67.4415	48.8195
RchiOBHmChr7g0219031	39.1322	36.0415	40.8566	19.8269	21.2061	23.9049	343.317	345.899	283.412	297.68	513.235	535.764	130.413	131.789	246.751	160.128	256.68	262.578	225.999	205.673	162.726	140.322	318.461	310.001	281.235	296.873
RchiOBHmChr6g0290371	45.796	71.8879	49.9717	30.1373	34.4799	29.1153	137.246	136.263	171.729	168.693	97.9501	100.392	508.309	517.101	88.4488	87.7226	83.9168	106.467	94.0283	96.1553	123.788	110.95	152.453	190.589	85.8654	86.2056
RchiOBHmChr4g0386271	20.3551	18.5753	25.9351	11.053	13.5484	11.6868	24.1718	21.2657	20.1015	25.472	54.5429	62.7078	23.1988	21.1362	35.5484	22.4831	21.1537	20.1804	11.1028	6.09451	18.1016	16.5937	15.7922	24.5845	9.21798	21.3058
RchiOBHmChr1g0354021	2.36012	2.42166	2.10173	1.39908	1.39987	1.02175	9.2487	7.23703	16.2577	15.452	24.3372	21.3436	18.6588	19.9499	5.76994	1.47053	0.667082	1.11368	2.15199	1.34533	9.68686	9.83768	8.27937	9.11719	7.05405	8.97216
RchiOBHmChr7g0196791	496.568	519.315	518.487	289.328	265.578	303.692	423.6	417.047	549.412	566.795	2437.06	2428.54	1093.11	1110.08	49.327	80.7812	95.3683	119.01	12.0717	7.76231	2603.49	2637.25	357.545	457.315	11.6753	12.8028
RchiOBHmChr7g0179481	2.36736	1.71605	3.31692	1.41851	1.10463	1.6377	36.4099	37.6232	147.5	152.451	124.558	121.746	3.14209	3.24871	0.843694	2.17583	12.4637	12.2618	26.4722	26.1899	7.71451	3.20635	16.1189	16.0218	0.566735	0.453432
RchiOBHmChr5g0056371	51.6242	57.2789	65.5187	34.886	30.1777	32.5081	0.752176	0.225595	0.774131	0.643569	30.6891	25.955	2.22223	3.24734	0.332745	2.68544	4.61637	2.4887	1.72365	1.48702	16.8985	5.25079	7.53885	5.8211	0.0782303	1.2518
RchiOBHmChr6g0255611	21.3305	18.2638	20.4871	11.0412	12.8203	9.7012	40.8019	39.0576	21.8202	22.5676	26.7218	29.9055	16.9694	14.8948	9.86407	14.5255	65.5051	76.2676	38.2376	36.7831	9.08376	6.41882	93.4706	101.199	6.93628	7.24992
RchiOBHmChr4g0429621	31.4168	34.1277	35.1042	17.6447	25.0922	13.4982	190.526	190.614	232.04	227.839	241.224	240.376	150.694	158.221	23.1826	8.48184	2.45704	1.64506	2.80725	3.49273	2.65736	2.03981	0.919535	1.49915	5.78764	3.509
RchiOBHmChr6g0306871	4.60706	6.01265	3.62929	2.42938	3.06544	2.47046	27.4199	27.7948	31.9243	22.8821	32.5236	27.9847	120.025	115.093	67.5295	43.4806	46.1216	50.1313	41.1539	43.1432	132.31	150.013	46.4418	45.4086	83.9327	88.1318
RchiOBHmChr5g0075391	11.2434	18.563	13.1545	8.30939	9.03178	6.66218	20.2698	20.1787	22.4135	21.7745	33.0248	28.5163	91.3016	97.8043	16.6771	9.14216	9.8111	12.4033	9.63273	8.45941	56.678	58.6245	19.1337	19.017	17.7538	20.8517
RchiOBHmChr4g0431281	20.2804	28.4825	30.7618	15.1742	12.7294	16.6961	1.45834	0.945074	4.65162	4.90195	23.0366	22.0793	298.972	299.357	5.87995	8.72009	3.32086	1.95675	26.4675	19.895	2297.47	2254.3	15.0254	24.5052	115.717	100.179
RchiOBHmChr5g0070291	14.5492	19.6415	14.4602	9.23294	8.69926	9.33262	20.4244	21.322	32.1881	31.0945	17.2071	18.2681	50.2062	50.3979	26.5224	28.1646	748.31	584.748	674.997	621.325	167.513	167.653	316.591	365.209	2343.75	2340.06
RchiOBHmChr4g0443981	4.2712	6.67768	3.61703	2.43876	2.72303	3.01696	5.16076	5.04508	18.745	18.5189	7.96008	7.81319	6.27415	6.20817	43.8172	20.1144	22.5302	21.8993	11.1939	11.0872	3.37726	3.32371	15.7212	16.3866	26.9429	31.9565
RchiOBHmChr4g0397051	12.8158	15.3275	12.4447	7.28589	8.09354	7.36662	35.6401	37.7628	81.4777	79.8238	67.5292	65.7274	700.131	704.955	23.9035	67.1834	86.0483	76.3988	195.894	202.88	252.995	262.083	55.4324	50.7685	41.9961	48.4656
RchiOBHmChr3g0455851	34.788	41.6326	40.6043	22.5784	23.4232	19.5529	786.473	825.716	744.34	751.81	844.083	859.399	1050.47	1079.36	737.873	501.147	511.51	533.428	440.688	400.46	587.519	607.946	674.707	698.819	1430.18	1492.04
RchiOBHmChr3g0466291	6.62618	4.43721	5.66544	3.1299	3.28845	2.97843	29.1326	35.2641	29.3389	28.8618	32.1784	29.4229	3.73218	4.16091	19.227	17.1873	18.8007	16.8245	15.2815	10.6499	13.6103	11.6074	34.1342	31.5254	23.2092	25.2626
RchiOBHmChr3g0483041	3.91256	4.31269	5.29565	2.69026	2.28298	2.62308	62.2095	61.9992	2.28239	1.57634	22.9294	23.7348	81.1345	88.278	1.71542	0.750083	12.0551	13.6335	2.82261	3.52915	21.2818	21.4141	13.2409	6.92826	2.25376	1.64501
RchiOBHmChr6g0290421	1.63243	0.821362	1.20761	0.800582	0.693938	0.555053	188.371	207.387	120.735	122.608	31.3048	36.1737	1.62635	2.15024	26.2191	34.5028	38.2376	38.2029	41.2244	40.7552	5.07068	3.54343	117.545	120.013	7.01033	2.57876
RchiOBHmChr7g0237101	108.779	151.743	110.79	73.0182	62.1465	73.4964	19.2721	19.4481	47.0977	45.8443	26.9686	26.3448	128.235	126.218	83.1353	190.762	256.444	230.521	181.587	169.3	71.1039	63.86	250.2	262.408	482.611	505.025
RchiOBHmChr5g0018331	50.8984	62.2043	53.0986	30.6961	33.4751	29.2635	163.965	182.641	135.305	132.707	197.791	196.356	557.691	539.156	253.544	218.308	1408.74	1559.1	2221.1	2466.62	2108.97	2203.28	697.942	821.737	348.44	371.705
RchiOBHmChr4g0440921	7.34988	20.3436	11.3625	7.43813	5.87704	8.68031	7.16521	7.93443	22.1572	18.9726	10.0691	10.2548	2.66675	3.69081	31.7677	53.8245	434.834	349.966	273.73	226.011	192.546	166.304	265.698	290.834	1095.8	1103.3
RchiOBHmChr6g0252091	5.89484	5.04834	6.32096	3.44217	3.32957	2.91954	2.79882	3.06886	2.98218	2.74144	8.92385	8.46104	1.43617	1.72008	2.21116	0.952838	3.2418	4.09775	2.5232	2.24155	1.58037	1.86	4.11426	4.79234	2.22257	3.41581
RchiOBHmChr2g0165231	36.8283	30.962	39.3957	18.9459	18.7589	22.8442	0.0388358	0.128125	0	0.0562325	18.833	20.4905	1.79351	1.29102	0	0	0	0	0	0	0	0	0	0	0	0
RchiOBHmChr2g0155381	65.6365	59.8659	63.9524	33.5282	37.7601	35.4691	2.91668	2.74931	1.04825	1.80995	195.284	169.162	0.89086	0	0	0	0.78138	0.244593	3.15089	0.19698	17.8709	13.4234	0	1.33492	0	0.254261
RchiOBHmChr7g0242441	6.79408	7.7823	7.59346	4.81382	3.79325	3.81738	1.21041	2.16306	1.14193	1.38749	5.24868	3.55237	5.52091	4.99549	0	0	0	0	0	0	0	0	0	0	0	0
RchiOBHmChr7g0181371	7.02146	8.45116	8.69775	4.94241	4.80332	3.77937	0.116507	0.0320313	0.0244257	0	0.224537	0.379923	6.64265	5.42753	0.415758	2.2075	117.291	128.578	50.8263	48.2858	1.26908	2.05666	1.14177	2.87947	11.7296	13.366
RchiOBHmChr1g0366891	6.54007	11.253	10.5126	4.89128	5.31036	5.7628	0	0	0.0966923	0	0	0	43.5194	33.5842	0	0	0	0	0	0	0	0	0	0	0	0
RchiOBHmChr3g0471581	2.88595	2.02166	2.51006	1.31209	1.31721	1.57322	3.87118	3.84291	6.84678	6.48308	5.22622	5.20761	1.12579	1.42773	0.859708	1.28885	7.46265	7.63589	5.57106	4.84751	4.3335	3.66906	7.74187	7.64202	6.37082	6.7222
RchiOBHmChr1g0331431	23.1989	21.7492	23.2971	12.9464	13.0121	12.4903	344.081	336.451	420.802	436.624	690.89	679.249	180.788	182.303	0	0	0	0	0	0	0	0	0	0	0	0
RchiOBHmChr5g0057441	6.64704	11.5643	7.31136	5.31013	4.67008	4.37291	38.7347	41.8691	64.2716	70.7867	41.3131	37.7854	73.8038	75.8412	8.26987	16.6514	120.652	251.479	9.0128	18.051	485.146	563.085	29.5041	35.2544	23.483	20.7411
RchiOBHmChr1g0331361	15.0016	14.9806	15.5557	8.02337	8.68586	9.01224	103.136	95.934	94.1546	102.427	91.9374	100.929	120.148	127.17	112.91	87.9549	130.614	128.298	149.742	143.229	117.261	131.869	140.724	147.643	206.178	217.526
RchiOBHmChr6g0293831	28.9032	27.0731	34.1275	16.9534	15.6067	18.313	6.69634	9.8107	25.6578	26.5364	81.1894	75.1629	161.633	158.586	25.125	26.2254	78.3202	43.5502	7.01831	6.66461	210.636	218.918	74.0699	79.4429	292.126	278.941
RchiOBHmChr2g0174691	3.42542	3.7692	3.07354	2.06185	1.72871	2.00131	11.5269	8.95727	14.7993	11.9316	25.9559	22.8638	32.9146	32.7672	2.41055	4.13507	17.3289	10.9607	15.2724	19.2754	99.5201	86.9415	7.52704	7.23772	1.7438	1.86023
RchiOBHmChr6g0279041	14.6646	24.633	21.5077	11.2366	11.3136	11.747	58.6625	60.6012	33.2062	35.4627	28.8294	29.1724	614.701	594.585	40.1072	58.2019	53.6299	60.7798	39.4815	43.679	6.43985	8.67269	30.3166	40.4075	24.832	26.6689
RchiOBHmChr6g0279131	12.0548	14.8526	13.2697	7.08146	7.51682	8.09178	39.711	39.7861	32.2162	31.7042	23.1534	24.1115	72.5072	62.2494	7.52804	2.83257	61.7349	53.4513	7.79917	6.56492	607.105	615.527	74.7036	72.8675	30.5549	32.595
RchiOBHmChr7g0229081	6.52648	4.87362	4.06005	2.79425	2.96018	2.9806	4.07484	3.94848	3.77729	4.08288	2.66103	2.64453	2.22646	2.3489	0.712798	0.818863	3.04663	3.119	0.946585	0.8121	2.61774	2.4506	3.95786	3.5837	12.5154	12.0915
RchiOBHmChr2g0143261	34.7865	33.9715	31.6494	17.1828	19.253	20.375	0	0	0	0.0514792	8.94173	10.0169	1.88516	1.25425	0	0	0	0	0	0	0	0	0	0	0	0
RchiOBHmChr5g0047241	12.8255	15.1457	11.2106	9.85511	5.40549	6.79654	33.2184	33.366	78.2038	76.9764	22.7	23.1065	4.26605	4.58658	0	0	0	0	0	0	0	0	0	0	0	0
RchiOBHmChr1g0345031	4.36574	4.01927	4.2082	2.2011	2.4472	2.47913	0.226888	0.0935673	0.713505	0.574916	30.9093	30.8155	1.11573	2.50131	0	0	0	0	0	0	0	0	0	0	0	0
RchiOBHmChr2g0154591	3.16636	3.05877	2.76867	1.66023	1.55556	1.88287	2.98724	3.07052	3.25726	2.72782	3.23295	2.82936	3.10679	2.52565	2.07454	1.34972	2.77285	1.95625	2.10385	2.15736	3.89366	3.70983	2.56524	2.94054	1.20217	0.659537
RchiOBHmChr4g0445361	4.4253	3.47176	3.32249	2.02576	2.21733	2.10091	8.99822	8.14569	8.36096	7.92182	7.99862	8.19957	5.57721	4.84967	39.4232	32.7266	47.3012	48.1099	69.0413	69.2482	10.5656	9.68548	100.674	92.7558	28.0139	26.0962
RchiOBHmChr2g0137671	2.26077	2.5797	3.81561	1.57185	2.09995	1.19388	112.191	125.249	139.546	124.109	186.746	194.869	113.402	109.413	27.3988	26.932	32.8739	32.9294	16.8836	12.9628	15.6036	18.2898	39.9996	39.2775	29.3345	42.2777
RchiOBHmChr4g0412861	8.48102	8.74578	8.15423	4.44295	4.62503	5.31671	11.8625	13.2757	15.9896	13.9198	13.6246	14.6822	7.07136	6.68657	26.8881	18.4124	24.4166	26.7928	12.7611	12.3417	10.7178	11.6962	23.1546	21.6969	8.67761	9.12245
RchiOBHmChr7g0225421	10.6479	12.3585	10.9264	7.12391	6.01456	5.99747	12.623	12.9113	9.00103	8.6388	32.2765	37.9349	30.3193	31.5481	7.72954	7.9702	17.5921	16.4416	23.134	22.4916	39.1026	35.7611	44.4861	37.7899	16.4607	16.1081
RchiOBHmChr1g0370351	2.3092	2.46987	1.80483	1.20618	1.08871	1.44781	0	0.0298474	0	0	0.967678	1.64029	0.123795	0.233233	0	0	0	0	0	0	0.0184774	0	0	0	0	0
RchiOBHmChr2g0158001	37.9727	51.9445	45.6705	26.1856	24.3723	26.1027	44.2673	40.4231	45.7402	45.7264	22.3948	20.828	474.041	477.35	117.861	125.403	53.1442	49.0019	25.1863	28.2519	46.0933	59.1656	45.4639	46.9608	177.436	176.452
RchiOBHmChr1g0336881	15.7599	18.1311	19.6884	9.10021	11.2598	9.94956	12.7173	13.5031	15.6293	16.2975	57.4169	56.1992	243.712	253.526	10.5985	9.2153	13.2265	14.8448	30.3615	27.8491	20.5997	23.4814	20.0776	19.2678	12.208	12.5771
RchiOBHmChr4g0444191	191.731	243.961	200.771	116.23	137.617	106.152	8.72421	6.91395	17.3595	17.3974	38.571	39.7477	73.9476	75.5955	36.108	52.0125	2.27068	3.06184	3.41215	3.49324	25.4273	21.1003	39.1926	40.6398	0.426235	0.189456
RchiOBHmChr2g0101571	2.71124	2.57951	3.53941	2.05146	1.55068	1.35568	2.78333	3.39179	2.38141	2.57784	0.851738	0.817682	0.772012	1.10575	0.341653	1.47714	1.62231	1.17757	0.859613	1.1143	1.15229	1.12873	3.96249	3.76428	1.23356	1.62195
RchiOBHmChr3g0480321	56.3084	54.5178	52.096	31.5569	27.8096	32.9619	284.773	276.141	249.798	257.665	432.463	441.146	222.733	222.521	145.075	140.428	276.99	236.642	215.327	222.513	361.793	346.046	312.289	289.722	181.539	193.868
RchiOBHmChr1g0378391	185.785	249.18	216.914	122.244	147.814	99.3701	5856.19	5955.12	6770.63	6799.8	6556.96	6477.92	5899.03	5781.74	1566.12	752.164	35.3997	39.5524	227.256	212.432	191.698	195.348	35.533	36.361	148.752	137.155
RchiOBHmChr2g0165241	91.1645	76.3798	84.0545	43.534	42.9682	56.3045	0.0311991	0.0128663	0	0.0225874	33.3597	37.694	3.20186	2.99503	0	0	0	0	0	0	0	0	0	0	0	0
RchiOBHmChr7g0226231	69.1658	57.4082	61.577	34.7695	33.64	38.3708	311.632	306.659	364.711	352.193	550.017	548.972	66.0219	70.5383	32.2223	40.3807	417.768	360.365	47.4409	43.0481	65.9823	52.5644	188.293	169.528	17.8333	16.3135
RchiOBHmChr6g0283921	8.44234	12.9235	9.47819	6.07246	4.95906	6.47276	3.4335	4.61259	9.50506	9.05802	2.36864	2.22232	14.9935	15.9174	39.618	9.35509	0.536572	1.25208	1.39002	1.54941	10.1203	11.3874	2.84386	3.57149	1.54745	1.55553
RchiOBHmChr5g0019591	4.34054	5.78203	5.05468	2.75259	2.64055	3.24576	0.252777	0.338792	0.447142	0.263069	0.993349	1.00975	3.68858	3.11898	11.9161	10.2374	3.52562	3.89512	2.32569	1.673	7.4052	8.0319	1.95951	2.03907	6.05495	4.99385
RchiOBHmChr6g0312511	5.68893	5.59345	6.8211	3.57248	3.43023	3.25794	20.2305	20.149	18.6298	17.5757	24.3865	21.957	33.7544	32.6809	22.2151	13.8861	24.1231	23.1241	22.7073	24.0363	15.9037	17.9234	19.218	16.0027	11.2668	15.1868
RchiOBHmChr2g0095891	6.58656	9.41956	6.24611	4.24993	4.4023	3.97072	21.971	23.4785	25.3678	27.1978	42.2757	42.4385	87.0242	80.5943	269.119	145.937	61.1644	61.7572	44.6697	44.2765	85.3654	86.4159	57.0214	52.1138	57.4737	50.3015
RchiOBHmChr6g0296071	16.1938	9.74638	8.43153	6.82845	6.17576	6.52725	285.795	279.925	581.91	549.894	328.332	335.046	4.51983	3.95321	3.49494	3.6413	127.508	114.232	77.745	96.2231	167.859	170.799	173.244	197.911	150.848	167.949
RchiOBHmChr4g0444031	316.401	367.202	359.638	191.077	199.49	202.159	458.177	451.547	392.333	372.194	1155.95	1140.57	3201.85	3146.16	497.514	522.461	516.761	466.503	225.652	219.342	998.92	980.1	942.568	1204.59	622.016	612.978
RchiOBHmChr5g0020401	3.97728	4.75125	4.58373	3.16036	2.35573	1.99952	17.6983	16.1574	11.2163	9.48761	10.7404	10.8377	21.6063	19.7061	6.31127	2.93214	10.3876	6.97906	18.3897	12.7738	55.3237	56.8797	72.6128	74.2005	0.309128	0.989305
RchiOBHmChr3g0448421	13.4578	14.3093	13.9054	8.03142	7.95144	7.70572	94.4681	97.0869	86.174	81.4809	98.7261	104.428	117.874	136.294	64.0267	45.6551	79.2743	80.9082	51.5312	54.8769	141.582	144.926	71.4321	87.2195	19.1273	15.4277
RchiOBHmChr2g0149641	49.0205	48.56	44.7257	27.0378	26.0898	27.8789	243.799	235.528	176.743	173.607	184.153	171.197	176.599	179.443	69.424	108.045	668.05	638.744	778.599	840.278	120.418	104.681	235.317	224.581	48.7161	41.5306
RchiOBHmChr4g0398941	53.3027	50.4631	51.668	32.6398	25.2555	30.5749	0	0.0616979	0.141145	0.487411	9.78525	10.733	1.72731	0.86274	0	0	0	0	0	0	0	0	0	0	0	0
RchiOBHmChr1g0370011	15.0185	8.54057	8.61857	6.02109	5.66459	6.67495	2.78143	3.22503	16.6318	13.3954	19.5191	24.6338	3.86114	4.59443	720.407	881.453	47.4734	47.1371	51.9436	56.9037	12.4318	12.5951	33.7762	42.3231	0.968472	0.295181
RchiOBHmChr4g0393581	1.70041	2.99144	2.20327	1.1578	1.49468	1.26586	12.6082	14.6337	14.6335	16.1858	19.1166	13.6907	12.5058	12.6983	0	0	0	0	0	0	0	0	0	0	0	0
RchiOBHmChr3g0460681	1.85732	2.40726	3.08531	1.38268	1.24288	1.5716	11.7538	10.2376	10.2922	9.75659	17.9413	18.8669	1.29985	1.51233	1.4299	2.35618	4.46541	2.73611	3.42254	2.68251	2.89725	4.11394	12.6142	8.85768	0.811462	0.618316
RchiOBHmChr7g0216951	0.889524	0.733796	0.643338	0.462797	0.388992	0.440399	8.30221	6.90148	8.18198	6.57854	8.64583	7.20524	3.85761	4.83414	11.0702	7.83706	3.98423	4.14446	3.16383	3.09045	37.4506	48.4672	6.06608	8.19796	17.3511	14.0417
RchiOBHmChr6g0290991	5.46272	2.55441	4.72267	2.15927	2.56532	2.55529	109.096	108.065	97.3305	95.1567	38.3131	38.054	0.250025	0.495847	3.22461	10.6505	65.1271	63.4122	6.65693	8.22342	4.52794	3.05344	47.1164	44.5122	5.88104	9.33623
RchiOBHmChr4g0391751	2.75672	1.94505	3.39803	1.70626	1.61343	1.27575	2.24521	5.9523	0.201732	0.116106	0.231806	0.209185	0	0.326403	0.156079	0	0	0.376568	0.1617	0	1.47394	1.27394	1.47342	0.587198	0	0
RchiOBHmChr1g0340051	4.31966	6.80277	5.62761	3.91868	2.92368	2.65128	0.0149509	0.0246626	0.0188067	0.0216482	0.140467	0.117009	15.0111	15.3769	0.261911	0.262676	0	0	0	0	1.64891	2.57324	0.302194	0.465308	2.08677	2.88299
RchiOBHmChr4g0423891	5.97857	9.15963	7.15581	4.22745	3.79244	4.70807	15.739	17.5273	75.8795	71.3385	77.4987	81.6786	0.628497	1.49571	0	0	0.229691	0	0.308741	0	424.576	458.803	1.06904	0.224232	0	0
RchiOBHmChr1g0371521	20.3341	27.4914	21.7375	13.5093	13.7703	12.348	0.782167	0.516098	1.86938	2.60485	1.8089	2.39756	35.0517	39.3737	0.532859	0.080836	45.1041	60.6995	103.628	107.455	0.39937	0.0690363	2.22771	2.00472	0.894845	1.05005
RchiOBHmChr2g0087561	8.66912	7.65549	7.92892	4.75788	4.21628	4.89873	134.851	154.465	151.368	138.773	147.083	149.871	53.6627	55.6389	49.952	57.7378	90.1879	91.4386	81.5809	74.2894	81.2201	76.5153	128.699	119.912	115.079	102.778
RchiOBHmChr3g0463131	36.9312	32.3632	40.4495	19.0798	19.5939	24.1616	0	0	0.0223254	0.0256986	55.5403	52.7827	3.40002	3.15471	0	0	0	0	0	0	0	0	0	0	0	0
RchiOBHmChr6g0262191	20.4497	17.7393	19.61	9.9034	11.4389	11.7802	9.66534	9.90723	9.62803	9.38392	21.4807	23.757	16.532	15.237	0	0	0	0	0	0	0	0	0	0	0	0
RchiOBHmChr3g0475941	49.4571	67.9747	52.4003	31.124	34.2114	31.6989	65.4169	61.0432	83.6309	81.4477	241.093	247.119	215.365	204.377	586.018	467.117	80.2868	85.7299	54.1428	52.8891	275.776	264.514	100.297	98.2593	97.7221	95.4113
RchiOBHmChr3g0454371	5.35219	5.74721	6.45775	3.84691	3.13512	3.01764	70.2167	69.4665	265.754	260.804	238.052	231.599	116.618	113.565	16.171	6.19715	0.557956	0.376181	5.58448	6.44856	13.6491	13.5748	3.06998	4.23187	0	0
RchiOBHmChr2g0170621	15.4723	19.0956	17.4132	10.006	9.49466	10.2209	0.646138	0.79939	2.38027	2.63967	23.9823	20.0768	7.77575	7.85912	0.673757	0.333888	1.51463	0.812779	0.0465349	0.0872747	92.6118	90.5555	5.89399	4.35141	2.85128	2.25308
RchiOBHmChr4g0425981	102.707	102.703	93.7833	59.2299	54.1146	57.8255	70.1157	72.1154	75.9701	74.4646	134.012	134.854	58.0532	58.2191	40.6713	54.3911	89.6844	82.9092	75.6535	79.0249	68.5776	64.4504	96.8591	87.5529	99.4556	89.6635
RchiOBHmChr2g0132061	5.91665	4.93824	7.42933	3.73791	4.0266	2.63638	29.8675	32.2473	36.0915	31.8361	82.3147	78.2574	15.7877	12.0514	3.64408	5.03962	13.0637	14.4148	10.2724	5.68087	6.13564	5.53369	9.44025	12.6735	10.6595	12.7528
RchiOBHmChr5g0071491	509.791	777.66	578.238	347.242	376.423	344.244	30.7915	25.9256	84.324	91.027	964.777	924.914	19441.4	19259.6	180.896	134.749	1133.82	768.575	461.493	464.6	19777.6	19538.6	2325.79	2651.79	1054.62	743.367
RchiOBHmChr1g0367091	81.9625	111.648	89.5607	53.5677	52.5892	55.9562	125.458	127.592	75.9606	80.83	62.0683	62.8065	239.686	236.841	93.54	103.06	181.15	192.746	47.5044	48.3393	2076.59	2223.24	229.342	222.165	30.7084	31.7402
RchiOBHmChr5g0027491	10.6317	12.0059	11.9106	6.36824	7.10432	6.28134	28.6203	27.5011	25.2486	23.1823	29.6953	34.0666	21.4071	23.454	0	0	0	0	0	0	0	0	0	0	0	0
RchiOBHmChr4g0414401	4.76951	3.4417	4.32199	2.28434	2.36498	2.55839	10.0313	12.468	16.6492	14.9283	21.8499	19.8994	4.70652	5.90755	5.62714	6.5515	12.8677	10.4686	9.62269	7.64035	11.9512	9.09985	12.2243	12.6894	14.9034	13.773
RchiOBHmChr7g0232511	3.78891	3.45987	4.33645	1.9347	2.55193	2.16126	9.98138	6.65463	6.38241	5.41972	4.98946	5.04504	4.05474	3.27296	56.9089	45.5607	6.47335	8.49597	4.19335	5.11192	2.12352	1.76197	9.09397	7.38544	4.18707	8.62873
RchiOBHmChr7g0226901	20.8206	21.5851	25.4474	12.3387	12.6521	13.9995	0.520835	0.343663	0.524126	0.678731	19.95	22.5549	2.04898	1.34272	0	0	0	0	0	0	0	0	0	0	0	0
RchiOBHmChr4g0386021	52.2965	63.3537	61.9162	35.6053	30.9511	35.258	16.5916	15.0278	32.5862	30.8036	139.698	135.028	199.175	190.181	3.76443	2.94553	10.9759	12.07	5.43948	4.9083	145.732	146.802	19.8259	15.3737	27.3663	20.3734
RchiOBHmChr6g0281711	2.68263	5.9257	2.7	2.12575	2.26606	2.07969	279.214	291.838	28.5754	33.5767	23.8927	30.5553	13.652	12.8164	0.919279	2.24525	16.5621	14.6383	37.7146	31.3473	9.93519	6.4195	7.55003	8.81917	3.56611	1.49863
RchiOBHmChr5g0034051	1.5811	1.69928	1.97412	1.11368	1.07675	0.803764	25.0989	23.2889	44.3459	45.1884	40.0973	34.8921	25.9841	28.1182	179.988	69.1148	98.1615	114.573	105.223	99.2953	94.5976	92.4013	214.818	230.049	155.852	155.779
RchiOBHmChr7g0226911	119.594	83.4864	92.3145	58.3296	51.4078	59.892	629.854	615.43	702.104	708.069	738.269	719.629	34.0865	31.8933	156.776	220.217	557.763	511.731	413.204	379.564	179.7	131.639	663.417	643.083	218.42	222.168
RchiOBHmChr1g0368461	1.08536	1.15678	1.05897	0.610106	0.599303	0.691924	1.77076	1.93369	1.62721	1.39382	1.77411	1.77008	0.712379	0.505233	0	0	0	0	0	0	0	0	0	0	0	0
RchiOBHmChr5g0070781	10.3369	13.6236	9.8142	6.242	6.68651	6.45643	22.9287	22.7527	15.0469	15.6776	3.1358	3.62162	4.42566	4.88807	0	0	0	0	0	0	0	0	0	0	0	0
RchiOBHmChr2g0172321	25.4639	18.6199	13.881	11.4245	10.4875	11.4271	0.878493	0.452857	28.7314	23.7708	167.534	137.792	1.69044	0.595993	0	0	0	0	0	0	36.1086	30.3369	28.6526	27.5419	0	0
RchiOBHmChr3g0473311	5.76584	5.11026	4.27641	4.05857	2.59848	1.96556	53.5002	54.209	47.5788	49.145	61.22	61.7178	11.5616	13.2695	36.9515	32.5508	43.0175	50.8233	36.9772	31.9552	19.3862	20.5639	42.0181	54.8964	12.5047	11.4089
RchiOBHmChr2g0137261	214.188	251.615	243.47	136.688	130.92	140.068	220.182	227.067	435.906	452.838	982.376	1001.23	1604.53	1635.79	342.978	293.528	325.88	434.209	357.476	401.801	2236.47	2247.46	606.596	601.21	566.4	533.977
RchiOBHmChr2g0134991	26.9798	27.2347	27.639	15.741	15.9934	15.3008	182.23	195.819	154.704	162.318	177.854	169.798	145.096	143.522	113.948	86.4246	137.99	148.447	86.0986	64.104	58.7355	55.3746	258.092	281.885	98.1065	107.255
RchiOBHmChr1g0344011	6.19153	6.85919	6.6064	3.76705	3.65248	3.88864	77.405	73.4515	93.4222	103.564	136.17	126.17	50.1997	44.686	0	0	0	0	0	0	0	0	0	0	0	0
RchiOBHmChr2g0170431	17.6821	18.3507	20.1723	10.6645	10.1626	11.5243	2.17733	1.93837	1.54333	1.05089	18.7831	20.0607	14.3057	15.0764	12.3106	10.0011	2.78692	3.24608	1.21965	1.99331	8.36449	9.12083	7.90644	8.41514	4.94246	5.399
RchiOBHmChr3g0470011	47.3036	59.9624	53.1812	29.2408	32.5514	30.4691	54.3301	62.0825	99.2351	97.8104	369.705	358.11	573.83	553.933	114.674	61.2359	76.0974	94.1494	88.154	90.2381	551.562	544.437	150.102	159.973	433	422.104
RchiOBHmChr0c40g0503381	6.99372	11.6544	10.0265	5.3442	5.40943	5.74092	8.73473	8.48006	8.64113	9.41974	18.4778	19.2856	95.2442	89.3202	6.46422	5.26589	7.42231	8.01168	8.16488	8.51676	14.0301	15.0978	10.1985	9.49464	6.14156	5.66327
RchiOBHmChr1g0336981	2.70244	3.70163	3.3766	2.15821	1.76317	1.68187	24.0468	24.3538	10.6315	12.7282	7.8995	8.17282	38.2605	37.0563	46.2667	37.3894	57.9133	47.8967	24.1528	24.0171	91.3709	89.7892	83.5063	84.8617	66.8928	66.2862
RchiOBHmChr1g0370661	2.86994	6.19645	3.35558	2.11721	2.7706	2.25096	0.0192752	0.0317959	0.0242462	0.0558192	0.00696521	0	0.857197	0.94153	19.4251	3.38651	0.596423	0.441283	0.272087	0.218696	1.15149	1.13135	0.318763	0.211726	25.2054	27.7234
RchiOBHmChr2g0090651	125.408	119.259	119.69	73.6686	60.2331	76.001	65.9492	63.9417	138.831	144.77	138.111	120.578	40.5048	40.9272	46.0938	111.773	246.915	216.75	232.367	196.321	106.39	93.9396	286.059	283.492	408.806	395.172
RchiOBHmChr7g0198921	12.1043	18.0125	15.8804	8.26491	9.38014	8.82682	0.039246	0.129479	0.123419	0.312546	2.38254	2.73875	49.5406	54.6357	0	0	0	0	0	0.148428	53.3434	64.4992	3.10093	4.56242	0.0448998	0.191591
RchiOBHmChr3g0454121	47.1946	41.0551	45.6677	26.5922	24.7441	25.8498	811.571	785.767	808.786	790.66	1076.13	1057.36	195.006	189.554	278.174	249.321	486.412	497.258	450.099	431.182	524.346	462.037	477.995	484.017	347.317	317.248
RchiOBHmChr6g0266751	4.19008	3.6205	5.31001	2.7342	1.99673	2.8584	0.787964	0.628939	0.463616	0.257631	1.12057	1.11069	1.17386	1.05191	0	0	0.333668	0.328263	0.102515	0.240329	1.37571	1.63774	1.12094	0.721276	1.68664	2.85398
RchiOBHmChr7g0194711	59.8535	41.0388	52.4153	30.322	25.7886	32.4072	384.282	369.873	633.317	613.199	1068.01	1034.91	39.2452	35.5602	159.292	196.136	123.905	94.0759	76.8448	89.5291	328.131	330.581	271.782	266.737	60.1965	69.853
RchiOBHmChr3g0457741	92.3538	78.8958	87.708	47.218	46.7615	55.7351	0.265378	0.218881	0.433964	0.0384255	159.149	163.868	1.31635	1.22427	0	0	0	0	0	0	0	0	0	0	0	0
RchiOBHmChr7g0197471	213.962	226.126	224.562	130.924	123.853	128.929	700.077	671.269	786.699	808.096	2190.4	2162.99	2158.14	2155.52	707.001	566.018	838.945	853.909	880.838	945.703	1537.1	1528.76	1339.27	1329.93	1016.46	1010.71
RchiOBHmChr1g0327661	4.62068	4.25506	4.49572	2.58292	2.35245	2.80803	33.6359	30.9486	37.87	37.1018	62.6648	64.4139	39.7571	40.9029	43.8532	47.5523	95.6578	98.9114	84.8663	80.482	179.035	198.364	72.6658	76.61	154.38	128.381
RchiOBHmChr1g0376531	4.81213	8.35447	4.93909	3.33618	2.9746	4.17498	0.211153	0.0746386	0.0379442	0.109193	0.0218004	0	112.813	113.415	5.04944	10.2565	0.961657	1.06244	1.52073	2.16758	2.00226	2.79555	9.45043	13.6679	47.3826	45.6868
RchiOBHmChr7g0214921	5.66144	6.87423	6.291	3.70437	3.85652	3.28691	3.8548	3.43375	2.88166	3.3011	9.91785	8.03059	11.6609	12.015	3.66585	2.57245	2.95353	2.09475	1.48806	2.31179	9.58252	10.1682	5.60584	4.31492	1.91525	1.613
RchiOBHmChr7g0186761	103.009	90.2847	95.193	60.1109	48.1757	58.4102	12.6838	13.0555	22.0413	21.3181	93.6659	90.6339	1.68476	1.28959	1.34543	4.39334	15.6521	12.7814	5.29675	3.62718	25.4111	18.5467	26.1325	24.9291	1.42343	0.759234
RchiOBHmChr1g0374041	9.82507	10.2061	7.45144	5.38044	4.77258	5.76005	51.3095	56.2674	39.1604	36.2426	43.4707	37.8499	37.7179	39.7639	27.7733	42.7002	60.8137	69.941	63.2632	58.5064	74.6702	75.1395	63.9134	64.2058	20.4464	17.7073
RchiOBHmChr4g0422301	1.88449	1.67575	1.44781	1.07383	0.881252	0.934626	5.93813	5.632	4.18056	4.35539	2.33006	2.2267	1.15318	0.93238	1.70767	2.10819	4.22253	4.29257	2.4141	2.81133	0.909152	0.946004	7.83804	7.27116	6.49691	7.32101
RchiOBHmChr6g0309781	5.1726	6.60693	5.126	3.07029	3.79356	2.87495	3.29107	2.6877	4.89439	4.53058	3.29241	2.98169	4.22883	4.56449	4.00766	1.80955	2.43222	2.07468	1.22598	1.97739	2.78136	1.96038	2.68109	2.38926	2.46684	2.35455
RchiOBHmChr6g0283601	5.18089	2.72411	4.18072	2.71602	1.99753	2.27555	5.40406	5.57151	4.10153	4.62719	13.9324	13.4878	2.42193	2.71444	46.3484	45.0293	29.9399	22.9077	21.2451	22.3542	22.207	23.4591	22.0798	25.8275	97.1376	93.4766
RchiOBHmChr1g0351371	4.26139	3.19304	3.71743	2.24014	1.92422	2.31887	4.53736	4.57089	8.46192	8.08162	5.80795	6.10244	6.11026	6.05699	1.77954	1.31814	1.3864	1.28538	2.04848	2.15571	9.71653	10.9784	5.8901	7.43883	25.5547	20.1806
RchiOBHmChr6g0274251	105.994	120.126	116.798	65.4431	66.8808	66.1441	648.053	697.229	766.447	781.41	1916.55	1945.08	2732.37	2570.71	92.5358	271.052	1295.35	1333.77	959.832	976.99	1868.67	1785.37	1910.68	1761.99	1665.68	1730.17
RchiOBHmChr5g0007131	5.75016	7.06809	6.47665	4.21749	3.44373	3.46036	0.263288	0.0723858	0.551983	0.762459	2.66395	3.4915	14.6361	13.2776	5.80811	3.17456	2.22186	3.40023	2.21224	2.82131	8.60376	7.20397	2.2577	1.68704	7.83166	5.14127
RchiOBHmChr5g0068121	161.388	223.847	171.766	102.222	121.214	99.1398	1793.58	1769.28	1473.81	1445.75	1535.16	1511.68	1567.34	1598.25	2743.26	1730.32	138.486	153.688	239.11	247.451	757.125	769.767	167.766	180.26	663.948	677.253
RchiOBHmChr5g0002301	10.2857	6.36598	6.89303	4.4871	4.25736	4.92184	265.964	276.529	304.178	314.149	285.916	282.663	9.5322	9.56072	145.506	181.658	576.244	619.693	294.13	311.186	33.492	36.5238	702.577	675.363	34.737	45.4995
RchiOBHmChr5g0006891	22.0861	18.3581	21.0726	11.9031	11.2624	12.5309	82.0267	87.6207	90.9134	91.4107	223.534	216.372	103.514	117.324	160.848	78.1141	70.3806	90.5779	62.8636	47.5876	71.4936	65.9432	80.0021	90.3884	118.948	132.629
RchiOBHmChr1g0334371	3.4638	2.14771	3.49615	1.68135	1.69355	1.93041	2.02652	2.50718	3.9603	5.44944	17.2613	16.6625	3.46625	3.53532	9.36829	9.57434	2.91812	2.54917	3.13793	2.80568	0.591276	0.255524	3.85673	3.11377	5.21654	3.00325
RchiOBHmChr2g0115041	7.71101	7.08268	6.48378	3.74575	4.53872	4.06116	42.584	41.6303	68.8443	69.015	46.3788	44.6901	7.30224	8.61571	216.161	259.034	22.6247	22.4599	103.364	93.479	31.5662	26.043	46.9935	40.7361	411.079	396.711
RchiOBHmChr1g0366571	13.8716	13.7616	13.2408	7.30554	8.3897	8.03467	0.0790488	0.130397	0	0	5.97004	6.4701	1.41969	0.536288	0	0	0	0	0	0	0.20181	0	0	0	0	0
RchiOBHmChr4g0430791	4.74897	5.0932	5.43627	2.71136	2.83372	3.34966	0	0	0	0	0.00756363	0	2.75673	2.57735	0	0	0	0	0	0	0.0427495	0.0554235	0	0	0	0
RchiOBHmChr4g0447321	3.69118	4.72793	4.76091	2.90089	2.66297	2.02504	40.9989	44.1633	29.8726	29.6823	34.4069	37.1861	34.3926	34.0465	79.9117	69.4621	49.6814	44.7151	35.804	27.4317	49.3032	56.6532	49.0915	51.8844	90.4783	105.953
RchiOBHmChr7g0210481	5.69935	11.0569	6.29511	4.5445	4.90524	3.87344	0.517911	0.480563	0.515754	0.734288	0.0155959	0.0281479	6.79158	7.2469	1.74316	1.65037	0.283278	0.253354	0.239342	0.40807	0.28648	0.266655	1.32836	0.612352	0.222195	0.158021
RchiOBHmChr6g0260021	67.2613	72.6102	74.0155	44.4811	38.3037	41.3914	45.8422	48.4265	46.9134	46.9463	157.848	162.676	52.6441	47.5737	44.8521	33.823	20.4831	22.8345	4.58534	4.60696	63.2337	50.3532	59.3152	58.9853	19.1389	22.2504
RchiOBHmChr4g0398891	58.9288	88.1293	65.6243	40.7607	43.2594	39.4807	1426.33	1435.38	1215.89	1211.52	1337.55	1289.89	2818.16	2759.08	1092.76	834.516	2255.64	2209.07	2666.21	2511.22	4261.97	4165.12	1819.46	1776.5	1170.2	1212.55
RchiOBHmChr1g0345591	3.20178	3.34605	2.81238	1.87836	1.64677	1.91767	26.0617	20.9546	18.7626	17.7407	19.1905	20.792	7.00897	7.67286	87.6573	68.1831	47.4904	47.1472	9.83341	6.74149	8.28547	4.19548	28.3113	28.4322	59.0696	67.9147
RchiOBHmChr2g0086661	12.6912	15.7441	19.3594	9.04308	8.95825	9.77624	462.29	446.478	287.086	291.436	60.3413	59.8453	37.5049	35.911	458.356	228.958	286.926	275.895	374.415	366.047	68.2924	61.3156	526.164	469.392	578.966	580.227
RchiOBHmChr2g0160561	8.78896	4.29935	5.40059	4.26759	2.76836	3.71884	196.404	193.192	1535.34	1549.5	524.874	488.633	3.75511	2.40598	0	0	0	0	0	0	20.6947	7.52732	93.0158	101.098	0	0.103053
RchiOBHmChr5g0063081	39.1429	46.463	49.9648	27.254	24.464	27.0888	103.587	112.844	81.4496	82.3579	62.0255	61.4701	249.863	244.667	121.017	86.0335	69.6948	68.2912	62.4421	55.9195	50.0811	56.1363	103.683	97.9447	51.4844	55.9421
RchiOBHmChr1g0358851	3.56415	5.72679	5.25239	2.67874	3.10002	2.66156	0.0346684	0	0.0654139	0.0501982	0.927045	1.19834	14.2612	14.206	1.88945	1.43317	1.04022	1.62809	0.664154	0.524463	12.4973	11.8419	2.32516	2.25313	0	0
RchiOBHmChr6g0248871	2.17567	2.61099	1.71392	0.999797	1.32356	1.4842	7.50102	7.14526	11.5618	12.5438	11.1094	10.2664	6.64092	5.87731	1.74794	2.18372	4.65587	4.15519	0.0532615	0.149835	3.07477	2.79744	4.75614	3.19132	2.90083	3.9326
RchiOBHmChr4g0435571	3.85084	6.57758	4.12428	2.66178	3.2522	2.53296	0.453392	0.623254	1.60403	1.39504	0.696303	0.529789	4.52376	4.31912	0.220627	0.449051	1.22223	0.377047	1.79049	1.55397	0.405124	0.933746	2.29104	1.97134	0.237741	0.115279
RchiOBHmChr6g0281271	173.162	252.307	193.94	116.613	123.351	120.86	25.1175	25.1817	26.838	26.2573	19.9955	20.7744	216.047	206.724	13.0651	20.2457	88.764	80.2011	48.8954	45.3022	100.549	104.969	94.186	99.2475	90.8119	95.5051
RchiOBHmChr3g0471741	1.92861	1.34749	1.46506	1.05876	0.68011	1.03303	102.684	106.332	34.3499	34.0962	2.72345	2.51537	0.272349	0.360079	18.6474	30.0229	267.03	251.994	2.40818	1.99059	0.325202	0.156154	130.312	116.86	19.6536	22.7148
RchiOBHmChr5g0070161	5.65527	5.52793	5.41593	3.06454	2.96253	3.6979	14.4437	9.70945	12.2875	14.144	15.8692	17.5876	10.4247	12.2346	0	0	0	0	0	0	0	0	0	0	0	0
RchiOBHmChr6g0287291	9.53062	9.5371	8.35637	5.78078	4.92618	5.27043	100.313	101.657	100.425	101.899	96.9442	98.6413	65.2845	61.3726	84.5096	63.0873	99.7701	105.142	108.984	101.831	312.742	330.363	154.676	173.918	89.2608	90.9499
RchiOBHmChr3g0481461	374.383	381.274	402.532	227.159	218.201	230.296	435.583	463.681	469.345	453.438	1026.16	1001.67	2784.01	2863.56	1207.96	1326.24	605.932	519.371	360.343	366.534	596.006	544.597	499.747	543.082	241.393	212.555
RchiOBHmChr1g0358691	6.44282	6.83872	4.68812	3.54291	3.01634	3.95778	4.87473	4.69073	3.12983	4.59531	3.55973	2.05326	2.34505	3.1349	0.642448	1.46941	12.3793	10.8501	0	0.192044	1.55563	0.717097	3.91883	4.32273	0.580936	1.36339
RchiOBHmChr5g0011961	4.47898	6.03107	4.23582	2.88288	2.83839	2.87611	8.75089	11.0164	9.1538	11.1148	8.92071	10.0527	11.4754	11.6029	19.3044	16.1204	22.6581	24.1527	13.9316	15.0093	14.643	14.9327	21.8628	21.9791	61.7554	71.0126
RchiOBHmChr6g0246191	4.20452	4.26599	4.15987	2.08274	2.74819	2.56488	9.53053	9.45945	9.8549	9.55069	11.3241	12.923	4.88122	5.84476	0	0	0	0	0	0	0	0	0	0	0	0
RchiOBHmChr6g0292211	97.2101	87.1111	89.3946	51.0243	53.1636	55.7321	22.8831	21.3123	22.9896	22.5504	44.535	47.1847	8.03269	8.02348	29.8189	25.8949	15.6539	20.3915	5.89294	5.25296	52.4656	55.7003	26.1661	29.3804	6.26171	6.15951
RchiOBHmChr6g0293461	1.59742	1.5471	1.61199	1.07198	0.871391	0.821453	13.4406	10.8829	9.32974	8.78136	18.1243	14.4849	4.7661	5.05964	14.7558	7.70765	7.76137	8.94834	7.02386	5.96661	8.62024	6.51023	12.198	12.7532	4.68807	6.20134
RchiOBHmChr2g0174061	12.045	7.92119	9.96313	5.13305	7.46451	4.87076	126.666	136.968	125.64	136.616	122.765	149.892	60.8878	77.1407	26.0676	56.6134	81.3392	82.572	48.6117	71.89	104.997	90.9032	115.739	105.189	44.4821	49.1393
RchiOBHmChr2g0172841	2.64201	3.6733	3.09723	2.03086	1.61123	1.85373	61.7944	69.3155	68.6912	75.3582	86.9042	95.0817	100.411	84.2186	64.0158	34.1553	417.909	455.771	873.993	660.826	143.877	156.191	85.4547	56.3969	101.174	111.561
RchiOBHmChr2g0112631	5.59115	5.22137	5.03654	3.38567	2.56688	3.32126	77.0279	68.1434	42.0611	45.3269	102.352	94.6195	2.83135	6.23899	28.139	59.3064	16.28	16.6703	16.3936	14.6077	25.5439	22.4026	19.4667	17.5767	0.0841686	0.0897884
RchiOBHmChr2g0099771	87.7034	153.527	101.437	64.5375	73.9246	61.7582	126.832	119.319	65.509	66.7253	64.8865	61.6628	767.441	785.37	737.854	638.716	16.8657	21.1177	22.0113	21.5129	50.9445	53.3949	52.3313	47.9873	156.184	154.98
RchiOBHmChr1g0314151	240.193	190.605	196.836	132.357	114.161	120.795	3120.1	3079.88	4035.38	3985.68	3918.79	3995.6	45.1525	45.5794	277.167	245.763	840.187	696.045	720.987	714.277	352.56	139.308	3594.82	3568.64	832.983	926.884
RchiOBHmChr6g0268731	1.80145	3.85042	2.27363	1.7286	1.44225	1.45142	7.06671	6.91844	8.63626	6.07282	9.17636	6.93196	21.1281	20.2684	0	0	0	0	0	0	0	0	0	0	0	0
RchiOBHmChr5g0054361	16.9159	17.4013	17.6524	9.71189	10.5607	10.1632	98.4061	98.6098	92.1092	93.3883	114.081	121.256	99.155	99.0618	101.588	71.4308	107.311	115.625	110.083	117.911	73.5518	77.2093	141.558	130.744	144.248	146.25
RchiOBHmChr5g0005531	2.17979	2.60572	2.3497	1.35244	1.53373	1.28249	50.0815	51.86	40.898	44.6167	24.8521	25.8171	15.6875	16.717	37.4555	24.7945	83.9825	82.7981	36.9902	31.4735	39.4544	40.983	77.4679	75.8559	66.1594	87.0466
RchiOBHmChr6g0292201	20.3739	21.7053	17.59	11.5216	11.6432	11.8009	3.9475	3.63889	3.57812	3.53034	11.999	15.447	2.38305	1.49658	4.18081	3.59973	1.30637	1.49941	0	0.658651	6.28385	6.66093	4.80013	4.88873	0.796971	0.566789
RchiOBHmChr4g0386031	54.6288	57.8202	59.3002	31.5927	34.0851	35.0634	60.8542	65.2039	65.9391	66.984	57.7654	60.4018	97.5232	98.2236	61.3275	45.174	42.1486	45.6517	33.1353	35.4612	94.342	93.0219	61.3149	61.9306	147.655	171.257
RchiOBHmChr1g0314081	226.437	331.94	254.055	163.298	160.651	152.356	5.23632	4.11319	3.26201	2.45511	3.13561	3.83787	92.5924	87.2551	25.9175	25.4091	223.936	210.367	241.86	250.612	132.409	118.14	71.0175	74.7275	61.8464	53.8031
RchiOBHmChr1g0345581	4.24331	3.15725	3.92409	2.69093	2.28024	1.61436	0.566303	1.95325	1.48946	1.41633	1.59989	2.82038	1.36489	1.08273	27.1062	19.2606	12.4543	15.715	2.38779	0.876173	1.62976	1.59039	6.43269	6.45613	25.562	25.0696
RchiOBHmChr5g0063801	19.0494	14.2047	14.2201	9.38538	7.45164	11.164	0.282174	1.0473	0.532419	1.53216	30.2837	18.6791	0	0	0	0	0	2.31899	10.2424	10.1382	117.999	164.003	0	0.129146	0	0.172189
RchiOBHmChr5g0039411	5.07389	7.0786	5.85872	4.33684	2.99022	3.1726	0.143125	0.177072	0.652634	0.751241	1.24126	1.40017	1.80546	1.5536	3.44752	3.62399	6.67653	7.51957	0.685475	1.65773	3.39817	2.33704	10.4211	16.0817	80.8485	72.5345
RchiOBHmChr2g0137231	30.5704	28.5388	23.2672	17.9244	16.8915	13.4202	0	0	0	0.186575	0.395779	0.882388	1.32239	1.50796	1.88107	4.76079	0.12082	0.26474	0.0324803	0.0304579	1.08557	0.341191	2.36769	1.94615	1.43731	2.20163
RchiOBHmChr1g0380641	3.97998	2.20098	3.65478	1.93077	2.33286	1.48736	18.1374	23.3168	23.8346	24.7216	26.8021	34.033	36.4823	36.2272	0	0	0	0	0	0	0	0	0	0	0	0
RchiOBHmChr7g0210071	15.9622	25.5252	19.4488	12.0778	11.9424	11.7168	94.1207	107.397	67.0975	61.6089	30.1753	33.1152	385.978	376.403	64.7406	81.1824	60.7151	59.6128	40.4931	45.8338	26.9195	23.423	121.095	108.18	27.932	24.183
RchiOBHmChr5g0001311	1.71615	1.20482	1.45479	0.851722	0.783009	0.945586	15.0251	18.1607	18.9344	18.5912	19.9012	18.3868	2.75686	2.44642	0	0	0	0	0	0	0	0	0	0	0	0
RchiOBHmChr4g0417901	71.4405	65.7262	66.7747	42.1427	42.33	34.9992	118.006	132.302	143.439	140.396	329.083	299.613	147.449	122.784	0	0	0	0	0	0	0	0	0	0	0	0
RchiOBHmChr2g0094641	18.9582	11.9282	12.1012	9.32457	8.71867	7.16898	521.539	534.226	653.759	638.295	341.444	343.245	12.6917	11.1301	194.036	163.792	307.011	291.709	187.387	182.113	52.1145	42.9984	436.42	422.203	397.948	418.711
RchiOBHmChr5g0008861	12.9537	14.5722	10.9302	7.91902	7.28015	7.36831	13.0616	13.2947	12.7668	11.6137	15.3973	15.8509	22.6059	23.814	23.9361	32.1976	28.9216	32.0782	25.8517	27.9195	14.0695	13.4073	27.5563	29.5804	37.192	38.2583
RchiOBHmChr7g0208651	34.7627	32.1215	34.7525	19.8883	19.9165	19.9123	57.8439	59.4145	31.512	34.1456	197.419	198.769	288.786	294.686	293.127	235.938	54.7751	52.8479	5.70943	3.86296	463.334	447.662	136.844	154.58	163.433	144.777
RchiOBHmChr2g0155341	107.585	106.237	110.058	60.3092	62.4455	67.6798	25.2488	24.5772	30.3775	28.9289	224.451	206.999	27.2997	23.3537	24.8681	15.9857	12.5838	13.7979	9.70918	9.9649	13.3952	14.7231	18.321	18.67	14.6599	19.8029
RchiOBHmChr1g0332301	17.3581	26.6673	22.0592	12.2998	13.145	13.387	48.3832	40.1845	41.3176	41.6306	23.1894	24.5611	141.755	151.291	29.5841	27.7506	36.1825	37.4728	23.3277	23.3921	89.0732	85.3344	46.0036	44.2884	28.0148	26.2784
RchiOBHmChr1g0376151	7.23358	5.17996	4.88352	3.43092	3.43012	3.31589	7.90237	8.65795	6.73572	6.72874	5.30198	5.32305	2.34018	2.36852	0	0	0	0	0	0	0	0	0	0	0	0
RchiOBHmChr2g0088361	5.15557	9.22404	5.9755	4.57485	3.52543	3.84128	1.24336	2.56378	7.09398	8.55159	4.10786	5.21297	55.9779	51.817	3.5438	4.49751	58.2922	61.1015	0	0	32.0149	25.5545	13.3817	11.5439	37.6958	36.8526
RchiOBHmChr3g0477181	27.4814	32.1849	39.1556	19.8982	17.1795	21.1099	0.15062	0.310574	0.521028	0.218091	0.598702	1.5226	78.5762	78.9376	1.83235	3.50244	15.8177	15.9151	26.273	28.4822	77.8287	80.3632	32.9349	59.7677	109.767	79.228
RchiOBHmChr3g0472351	28.944	19.1608	30.1908	15.2701	14.0129	16.8548	20.5933	28.3669	79.0482	74.4687	293.365	278.583	25.6008	23.9813	0	0	0	0	0	0	0	0	0	0	0	0
RchiOBHmChr3g0469891	37.9164	26.7271	35.4277	20.3321	17.4624	21.231	0	0.0371434	0	0	20.4718	22.1453	0.0385139	0	0	0	0	0	0	0	0	0	0	0	0	0
RchiOBHmChr6g0301051	26.441	28.2669	27.2463	17.3944	15.0924	15.722	262.841	257.819	264.486	267.885	367.63	358.203	425.341	405.852	397.864	300.018	205.713	228.89	306.161	290.432	493.351	516.45	418.405	417.441	291.484	312.637
RchiOBHmChr4g0385591	3.29998	2.66536	4.3798	1.78144	2.21093	2.11903	5.08408	6.53186	8.6705	10.9007	19.5729	19.3208	15.887	18.2408	0.380614	0.40418	5.5005	12.6266	2.26735	3.51281	2.69575	3.797	1.52706	1.78992	0.111856	0.119324
RchiOBHmChr4g0392611	4.53951	6.27957	5.63458	2.8964	2.95413	3.90032	0	0.0595016	0	0	0	0	19.7431	20.1644	0	0	0	0	0	0	40.887	41.452	0.46396	0.990541	0.330137	0
RchiOBHmChr6g0295661	172.897	187.98	176.528	105.139	101.633	110	186.667	185.446	204.975	216.558	548.787	540.15	551.528	555.553	102.098	104.666	272.125	270.327	190.367	190.769	484.738	475.54	374.015	444.089	92.5607	87.0067
RchiOBHmChr6g0295891	8.64994	6.17859	6.75964	4.14031	4.30655	4.30579	37.4392	39.8309	44.271	47.1443	47.2312	40.6871	7.27853	7.68085	1.4058	1.93667	5.74711	5.86681	8.38435	6.01668	5.66113	6.09902	8.53655	6.21803	3.17114	3.23993
RchiOBHmChr1g0372651	4.09112	4.45043	3.62904	1.90334	2.53922	2.78002	31.6164	32.2055	29.6902	26.8979	25.2714	15.1085	7.35163	7.70993	9.21683	19.2738	77.7332	87.9225	194.648	158.972	1667.29	1773.87	68.8039	65.6165	17.0021	16.3591
RchiOBHmChr4g0442201	2.37813	1.98587	1.66217	1.22838	1.37127	0.93932	17.4281	15.8231	15.6561	16.7745	19.1129	20.7502	5.28604	7.35543	0	0	0	0	0	0	0	0	0	0	0	0
RchiOBHmChr1g0323161	2.73838	1.96816	2.37475	1.44602	1.43301	1.29441	14.4089	15.4549	13.2482	18.2438	25.4033	22.3343	11.1071	10.6521	6.66571	7.21197	23.0224	27.0059	28.3398	25.5977	19.7289	21.7284	33.3031	32.3525	40.4353	41.9523
RchiOBHmChr2g0133221	16.2567	14.7839	17.3409	8.04122	9.65164	11.019	6.58137	5.32318	5.02063	5.50253	6.07597	6.45228	2.65086	2.88063	5.0415	3.2473	5.69328	3.53938	5.82245	4.53654	7.54468	7.30799	6.86586	10.8439	5.10062	5.80392
RchiOBHmChr5g0068901	32.9073	25.6433	31.8586	17.8427	16.5909	18.9586	12.4127	14.2908	23.7268	24.5694	73.9309	72.1578	27.3818	23.0409	112.087	129.131	92.2708	69.3199	38.1659	36.2977	51.6701	54.4178	64.569	72.7885	19.0614	21.3024
RchiOBHmChr2g0101231	5.03231	4.92308	3.91393	2.72592	1.99179	3.51201	11.3793	12.514	51.6038	54.6689	20.8762	22.6449	4.49161	4.31529	14.5958	14.414	48.3699	60.2903	1.35329	0.77245	0.357552	0.360543	10.4547	8.65349	6.47591	6.26733
RchiOBHmChr1g0354121	20.8911	31.7736	23.3089	15.294	15.2429	14.3125	23.6307	24.731	19.2725	20.6113	18.657	19.05	45.5717	44.3899	40.4066	26.8011	79.2246	75.6325	62.408	62.12	131.152	122.437	65.7363	70.8159	174.773	171.477
RchiOBHmChr3g0470591	266.712	444.483	319.788	204.44	198.693	205.848	6.5283	6.82032	8.5324	9.24518	6.4212	6.89535	1769.39	1774.38	57.1198	54.7762	5.09608	6.87936	9.29023	10.8094	55.5444	59.963	45.1352	52.2274	5.7807	6.06303
RchiOBHmChr3g0480351	29.5579	20.8109	24.2746	15.0293	14.1194	14.9696	339.814	347.322	228.815	234.409	187.966	197.696	16.1064	16.9137	52.3015	62.8128	199.459	185.477	83.4145	79.8652	43.2824	40.5859	299.236	295.426	32.0447	36.7463
RchiOBHmChr4g0426341	10.27	14.0544	10.6964	6.14709	7.49386	7.06732	26.3649	27.006	24.6052	24.1395	17.1146	15.1356	59.3805	60.6218	66.3141	66.1452	59.3898	52.2318	71.4086	66.4249	29.1484	28.5655	33.2736	32.7176	225.663	232.059
RchiOBHmChr1g0345661	2.02492	1.95865	2.06401	1.40769	1.0056	1.15291	2.05559	2.18522	1.33596	1.81891	2.67408	3.51543	1.09386	0.852236	3.75661	2.76176	5.26831	3.80774	1.38174	0.906995	2.6356	2.29815	5.39293	5.87484	2.74367	3.14986
RchiOBHmChr2g0142371	254.385	298.88	277.579	165.167	159.654	166.699	9.69206	15.0552	19.913	16.8404	150.131	163.399	600.39	565.7	79.5483	112.52	146.768	198.372	279.489	298.283	939.597	1007.86	65.3003	75.4103	248.563	203.256
RchiOBHmChr4g0437401	6.26446	7.71493	7.11017	3.89276	4.51512	4.06309	31.241	26.304	17.8581	15.4908	22.4607	22.179	133.312	128.548	97.0732	66.5923	53.2465	43.842	48.5621	50.1536	57.0765	55.0766	39.3167	40.8103	214.729	210.498
RchiOBHmChr1g0337701	38.0721	61.0468	43.1307	28.468	28.7405	26.9099	2.90355	1.39054	0.648001	1.69524	17.6674	17.3483	127.924	131.281	0	0	0	0	0	0	0	0	0	0	0	0
RchiOBHmChr2g0100171	57.6994	40.1392	47.8782	29.8521	26.7466	29.7081	2816.27	2840.94	4853.34	4744.33	5649.55	5479.75	20.8852	25.9136	0	0	0	0	0	0	0	0	0	0	0	0
RchiOBHmChr2g0159641	15.0493	27.3787	21.6397	11.4211	14.6678	11.8153	0.914533	2.45146	8.05273	6.95206	14.1277	16.1041	387.545	366.682	15.6871	11.3419	9.32547	10.3344	23.0527	22.0496	1908.45	1859.67	46.0024	67.18	22.1027	20.0905
RchiOBHmChr1g0372091	70.3437	58.6287	58.0437	38.5835	35.5866	36.612	535.906	536.026	586.507	576.588	887.56	902.873	322.497	316.936	189.157	148.877	190.433	169.124	194.937	190.147	452.452	406.908	606.445	581.216	252.756	250.882
RchiOBHmChr2g0105201	3.6339	3.23432	3.73629	2.31969	1.90845	2.04842	7.1541	9.44954	9.16215	8.89506	12.5138	11.935	6.42869	7.06927	6.45804	5.46489	10.0135	6.20812	12.754	12.8422	9.05271	10.0207	18.4325	16.0868	7.17645	8.22504
RchiOBHmChr1g0358781	363.54	449.137	416.14	247.67	248.19	232.269	104.363	100.318	75.6059	74.358	66.3651	64.0538	69.4308	75.8172	17.6092	39.4156	119.812	119.889	30.5249	28.8479	152.465	125.515	143.364	141.32	2.09707	5.41231
RchiOBHmChr7g0236181	3.81265	4.0794	3.24523	2.42391	2.43634	1.69151	7.07505	7.09634	5.5679	6.40916	4.13683	7.4431	6.44602	6.77776	7.61228	7.42221	4.96712	2.88012	5.41297	5.31123	8.42309	10.732	9.57065	7.74549	8.46035	7.89708
RchiOBHmChr4g0433101	60.0356	79.12	72.7345	42.3747	41.4609	41.7886	52.3885	52.5925	49.7415	51.2102	32.9704	33.2467	376.78	366.203	97.8797	122.335	79.6919	89.3009	76.6345	83.4904	152.849	145.837	65.9929	74.2388	123.66	131.706
RchiOBHmChr6g0302451	62.8873	65.4482	60.9012	39.1438	35.7988	37.2817	249.954	264.382	238.037	234.919	265.921	268.668	105.122	97.7853	138.97	134.297	461.479	406.656	155.168	153.59	180.513	162.618	191.44	172.092	201.362	205.137
RchiOBHmChr7g0196211	68.5054	60.529	54.2499	37.1539	39.6805	31.7904	5.29113	5.35072	5.62841	5.52947	39.9355	37.7638	24.3961	25.861	8.12723	12.5296	11.001	6.37407	9.53332	6.52534	52.1766	52.427	8.64452	11.624	31.7407	29.9854
RchiOBHmChr7g0192681	1.13829	1.00046	1.25393	0.644572	0.805002	0.555512	11.435	12.0277	10.586	10.5576	11.9784	10.3068	12.6913	12.5955	25.0712	23.1046	106.618	69.6901	1.48979	1.82221	13.1205	14.9691	14.7554	17.4061	24.9886	27.7547
RchiOBHmChr2g0138911	12.5594	10.9808	10.9839	5.92179	6.98032	7.68086	53.9282	56.0699	56.3507	54.097	57.1988	52.9197	22.7248	20.4467	24.8885	29.0098	4.1135	7.11864	6.83281	5.56429	26.6613	29.8436	15.5652	15.41	15.7915	18.4565
RchiOBHmChr2g0092041	62.6738	44.816	50.9313	31.0541	31.5484	31.4918	68.2143	58.4063	22.8884	20.3017	299.269	305.717	2.89671	2.45821	12.2657	17.584	26.5151	25.7091	0.476531	0.744765	11.744	5.49241	44.0006	38.7914	7.29947	5.19123
RchiOBHmChr5g0038571	23.5034	24.2041	25.7389	14.3633	14.1859	15.0996	127.985	137.261	138.431	124.472	194.53	182.733	117.673	127.766	95.3831	99.1704	76.0397	84.3805	46.632	32.9477	112.774	124.271	97.4591	97.2176	55.2567	63.3241
RchiOBHmChr7g0210231	13.9831	11.9806	11.5851	7.72647	7.09204	7.49615	54.1201	89.5702	83.3725	89.4965	71.5928	66.7056	31.1963	60.4124	137.595	66.2812	84.2783	90.9704	88.1025	85.7726	119.786	104.164	139.969	75.1826	140.062	158.289
RchiOBHmChr3g0460171	51.331	68.1702	60.9662	36.358	37.0331	33.7407	88.4949	89.1581	73.5541	67.5555	79.7431	74.5914	126.649	126.838	57.1265	59.8531	101.253	85.6163	71.834	68.4203	134.754	136.64	102.403	102.128	97.5269	97.0662
RchiOBHmChr7g0186471	11.8491	9.67847	9.0807	6.30949	5.87931	6.00414	33.1546	31.792	32.7199	36.1414	25.208	25.6839	5.39428	5.10206	16.5533	18.4139	39.4786	36.8679	16.9592	20.0829	39.4174	32.5702	51.0651	46.88	35.618	35.0025
RchiOBHmChr3g0479651	333.767	332.457	300.481	200.705	182.288	191.513	148.536	149.462	163.488	159.508	502.2	509.874	235.192	249.477	67.227	111.05	918.308	808.003	460.054	403.661	1571.99	1604.56	280.557	285.982	33.8965	36.4352
RchiOBHmChr6g0300171	52.3011	49.5587	55.1256	30.8648	30.6006	31.8619	164.306	163.572	294.388	285.674	245.639	254.422	79.0515	74.5736	95.9442	86.592	34.9566	37.6027	40.0441	36.2788	71.9555	59.648	65.679	65.2613	160.713	158.31
RchiOBHmChr7g0237051	61.1156	58.8311	70.4338	36.9292	31.7955	44.5316	2.82538	2.64632	153.893	155.528	411.727	425.767	10.4639	11.8258	0.0233029	0.17322	0	0	0	0	14.4018	6.61481	11.4832	25.4023	31.9405	32.4074
RchiOBHmChr5g0072831	4.2457	5.29196	5.69256	3.39056	3.0391	2.57109	0.0349674	0.0576815	0.0659783	0.0506313	0.277986	0.216651	1.71953	2.41973	0	0	0	0.0205267	0.0176285	0	0.0714168	0.0617266	0.128505	0	0	0
RchiOBHmChr4g0416631	1.26905	2.41307	1.41399	0.990964	1.18186	0.84106	167.347	173.791	9.44706	9.1837	1.07404	1.38461	16.5679	13.719	12.3455	22.4349	502.741	494.516	325.747	355.847	130.406	130.701	64.7575	66.4624	55.2567	54.2822
RchiOBHmChr3g0476361	24.3561	23.2395	23.194	14.9021	12.6672	14.5372	96.8606	111.455	107.324	123.254	75.8478	74.8791	17.546	17.3985	45.5019	48.9308	35.6997	33.1197	33.4162	24.9938	39.8876	42.8331	50.9295	45.5053	25.5031	18.057
RchiOBHmChr2g0091851	4.72138	3.47886	3.21224	2.46834	2.03148	2.29296	97.836	99.8461	90.0615	89.7716	131.905	126.908	5.56045	6.09134	17.0245	29.9177	83.027	80.3319	70.3947	54.8876	82.3618	99.1966	101.407	96.4993	13.46	13.2251
RchiOBHmChr2g0175821	5.07118	5.96306	4.26269	3.35409	2.50475	3.24087	6.59549	5.18687	6.75293	6.55173	4.98835	5.66864	2.92962	3.46865	0	0	0	0	0	0	0	0	0	0	0	0
RchiOBHmChr1g0317051	48.8101	55.6487	50.2364	31.9498	30.2929	29.7173	68.4906	66.7935	107.896	101.12	162.973	155.498	255.021	272.22	56.2812	69.226	82.2949	85.4682	87.7338	105.588	278.998	265.95	116.353	138.893	102.012	95.5492
RchiOBHmChr6g0311811	42.5955	32.9742	43.2715	22.6181	20.6109	27.6451	90.1156	93.4947	83.6251	70.6212	253.655	240.657	2.02813	3.00321	405.742	430.538	136.085	123.247	75.8776	73.0963	9.20252	6.27937	166.895	171.201	234.23	229.803
RchiOBHmChr2g0092951	46.0575	40.0532	41.1383	27.4702	24.2497	23.9541	293.185	281.385	371.311	385.4	360.035	348.289	207.636	222.247	38.4379	75.6256	180.393	180.925	181.155	192.097	194.237	182.639	174.752	209.042	61.8173	56.0382
RchiOBHmChr5g0063631	19.4419	24.7417	20.7988	12.4946	15.2672	10.8494	110.155	112.359	57.7213	65.7818	116.542	112.056	271.584	272.927	64.7044	59.5492	176.138	183.66	210.831	181.187	139.513	132.205	132.704	136.989	276.955	300.697
RchiOBHmChr6g0299681	1.54264	1.44896	1.44333	1.01829	0.792115	0.819927	18.6196	22.0973	13.5975	13.4427	15.5498	16.0226	2.03472	1.68427	23.3058	17.7999	56.5952	50.8856	12.933	11.8832	29.1022	30.4032	4.27668	4.1189	108.64	106.993
RchiOBHmChr3g0495321	6.03973	6.98448	6.15529	3.8977	3.47652	4.05433	3.81792	3.14898	3.89885	4.99319	6.67563	7.5771	20.5039	23.0053	10.2282	11.0312	12.8953	14.4112	20.117	22.3578	40.9586	42.7568	13.3897	12.8143	13.3856	12.7261
RchiOBHmChr4g0423321	4.89466	2.07928	2.85926	2.09906	1.58104	2.19033	12.397	12.5252	30.0591	30.2445	13.032	14.0525	0.0326725	0.0777549	0.390398	1.50035	2.18512	1.99594	1.81044	1.17395	0.643715	0.370915	5.87916	6.52195	0.327803	0.932507
RchiOBHmChr6g0264191	10.93	6.72467	9.6523	5.45719	5.30266	5.5198	111.554	122.966	136.429	146.076	150.434	156.816	11.3246	11.7626	46.3568	52.0822	495.482	472.093	759.009	871.356	52.5326	41.705	192.902	203.877	45.0119	38.7161
RchiOBHmChr6g0272691	8.45878	9.15618	7.97246	5.46709	5.65975	4.04325	73.9099	72.3383	82.9156	85.3236	102.804	101.709	93.5249	97.4958	89.7141	56.7459	60.3071	56.5261	48.5452	41.9809	53.5517	50.9624	67.7369	59.7101	77.1364	87.7501
RchiOBHmChr2g0099261	2.26104	1.7294	1.67883	0.98657	1.19274	1.21533	11.333	11.1991	15.029	15.4034	12.7107	15.5495	67.5255	68.4358	8.06409	7.51367	26.6161	24.9163	19.6736	20.066	43.6722	43.0782	16.5514	17.9095	28.2552	31.1856
RchiOBHmChr7g0196891	16.4566	13.1055	15.289	8.90116	8.76901	9.09782	24.8062	26.203	19.5555	19.8496	16.6347	16.6198	12.6958	12.0068	13.2711	19.54	32.8264	32.7569	11.4088	10.7442	7.45636	5.24961	21.2802	23.5035	1.21707	1.00325
RchiOBHmChr1g0359091	1.5706	2.19114	1.47014	1.16581	0.935352	1.00854	7.13896	4.93564	6.27285	6.30854	2.17505	1.16398	8.7391	7.28863	31.1631	49.6932	134.533	126.379	88.1765	84.4728	9.04132	6.08484	100.409	101.801	114.424	117.109
RchiOBHmChr5g0072521	82.9716	111.901	77.3271	54.5811	54.5798	53.2037	45.6335	43.4405	53.5588	52.1411	33.7767	33.3226	50.2966	51.7242	126.961	159.716	190.086	159.593	145.773	138.087	227.073	234.751	145.467	158.512	238.742	246.711
RchiOBHmChr3g0452631	3.89143	3.27824	3.59548	2.30271	2.08166	2.03149	24.4871	24.6191	29.9261	29.7099	31.0921	33.5925	3.39404	4.06726	19.5173	18.0641	31.5112	37.9685	29.2022	29.9786	10.9078	8.98061	34.7161	31.883	41.8772	43.4367
RchiOBHmChr2g0120781	0.350503	0.482002	0.392092	0.262139	0.230171	0.236726	9.02957	8.84389	1.86347	3.06431	34.5663	32.3893	2.7752	4.9773	1.09848	1.31231	1.32291	2.31899	9.38886	10.1382	5320.46	5649.32	18.6658	30.3494	3.22824	3.44378
RchiOBHmChr1g0343351	21.8075	18.7599	25.1399	12.9483	13.3129	13.0122	218.614	215.024	203.16	202.575	228.72	207.691	158.257	162.444	197.265	135.294	162.938	168.75	154.21	124.182	101.076	94.0467	182.19	199.167	129.386	138.235
RchiOBHmChr4g0396151	745.972	1204.8	751.71	510.677	599.127	505.85	80.2576	77.1431	159.599	157.649	491.332	506.899	2574	2580.66	1366.89	613.952	104.714	126.033	66.0724	61.6489	3825.08	3965.02	308.645	302.915	627.343	740.506
RchiOBHmChr2g0094351	2.9364	3.76885	3.15677	1.61571	2.44004	1.83607	9.40724	11.2416	5.40898	6.76567	5.94609	6.78323	23.5783	20.7682	10.4547	10.9095	16.0403	17.2776	13.8364	13.5913	10.1456	10.0569	23.7323	21.0588	25.8938	24.4019
RchiOBHmChr3g0485821	32.124	41.586	30.7522	20.2301	22.7648	19.4278	37.2199	35.9438	41.8927	38.8202	63.0391	60.9477	61.258	58.2679	0	0	0	0	0	0	0	0	0	0	0	0
RchiOBHmChr5g0074101	10.4282	9.46466	10.6801	6.40154	5.7637	6.12588	42.3117	40.6365	48.223	46.1889	65.6051	63.8948	12.7501	12.2656	20.0828	25.3861	28.313	29.7277	31.8296	34.6806	10.6329	11.5295	39.2652	35.6982	15.9733	15.3647
RchiOBHmChr5g0060751	2.27623	2.86615	2.25159	1.44671	1.45841	1.51911	102.988	104.8	50.6603	64.0169	67.1272	82.1904	167.004	147.604	45.2702	32.5607	59.2221	52.5174	36.4117	30.0696	651.206	686.539	67.5858	75.499	25.6731	36.8186
RchiOBHmChr2g0130951	1.73326	1.45085	1.12145	0.763889	1.03424	0.776483	2.14667	2.17381	2.80119	3.31845	1.49069	1.72388	0.346269	0.342063	1.01858	0.584246	2.17042	2.7176	0.816482	0.787312	0.36666	0.552906	3.21456	3.00693	0.734153	1.37055
RchiOBHmChr1g0359741	26.441	29.5766	27.3804	14.9821	18.1529	16.8184	3.71529	3.22997	4.98923	5.67036	29.6811	35.2327	57.1932	58.654	47.9831	35.8027	3.67196	5.6587	4.15104	4.6521	50.5527	50.1633	41.6991	42.8324	1.83806	0.980392
RchiOBHmChr2g0149141	5.0996	5.10233	4.94324	2.84092	3.06619	3.17678	60.8992	68.8496	80.9006	80.7623	130.53	125.339	55.0839	50.1322	0	0	0	0	0	0	0	0	0	0	0	0
RchiOBHmChr2g0093771	3.54018	3.27136	3.55678	2.40772	2.4767	1.25397	7.21583	6.23494	6.2673	6.94991	9.39005	9.70627	0.385696	0.641066	1.98557	2.92972	7.97414	9.30373	12.1476	9.23888	3.9914	3.12759	9.58916	8.61026	1.81814	0.707668
RchiOBHmChr2g0160671	7.92215	12.4985	11.3712	5.01581	7.47008	6.56297	1.32426	1.31979	0.138816	0.239684	0.0398775	0.827681	15.9971	17.1073	1.50361	1.88184	1.55212	0.906933	0.445076	0.156511	2.70465	2.77598	0.45625	0.858632	1.95692	1.68353
RchiOBHmChr5g0081961	15.6095	12.117	14.7927	7.84588	7.95251	9.77804	76.1853	80.4657	71.4215	70.2509	110.12	103.137	23.6623	19.1266	50.9194	66.2688	103.28	86.9817	83.427	80.216	144.753	165.967	132.883	133.474	254.731	220.208
RchiOBHmChr6g0269511	5.37626	6.29163	5.7638	3.3907	3.88824	3.12047	17.8334	18.7731	14.0204	19.0267	32.5602	35.0452	26.2888	32.3162	0	0	0	0	0	0	0	0	0	0	0	0
RchiOBHmChr3g0483421	18.2819	15.8243	16.4918	10.1813	9.44072	10.7172	163.5	167.114	120.085	122.03	124.842	133.602	102.728	108	141.985	113.136	103.577	87.1734	88.0672	86.3445	74.9777	76.7997	208.917	214.14	311.299	301.389
RchiOBHmChr1g0358701	13.8516	24.9372	14.0175	10.0943	11.661	9.85108	17.8334	23.4692	14.1853	15.3793	20.6594	22.6628	333.963	306.292	56.2794	84.2929	19.3035	28.3268	18.5099	16.2416	70.9705	64.1185	38.4311	34.8088	71.8587	72.9758
RchiOBHmChr3g0461491	124.568	164.869	152.152	92.5583	87.2137	84.7441	9.107	8.29611	14.4051	12.104	14.637	15.2919	163.152	157.688	9.85535	9.8334	10.2598	14.9209	21.4485	19.6631	80.5072	83.0804	12.9877	19.2853	38.6434	32.0996
RchiOBHmChr7g0194961	18.352	14.6302	14.5148	7.68299	9.82957	11.1191	0.035216	0.145229	0.0442982	0	19.8264	18.8563	0	0.0238915	0	0	0.0330204	0.0413452	0	0	0.143849	0	0	0.0644712	0	0
RchiOBHmChr1g0314791	9.51885	12.1849	8.82805	5.61225	6.26465	6.44669	5.15099	5.13433	3.81873	4.63373	5.97214	5.36076	16.0088	16.1196	4.47979	3.26205	4.68597	4.78652	5.79037	7.62662	13.9674	14.3551	7.7532	7.00235	6.57012	6.23301
RchiOBHmChr2g0103291	2.04551	2.87781	1.51419	1.42825	1.49413	0.913896	22.0968	24.8452	16.1459	18.4913	8.47799	7.92618	57.8602	53.593	97.1847	75.1262	29.3114	33.0386	13.7283	13.5494	4.74529	4.78977	35.5275	34.4151	27.0645	24.3901
RchiOBHmChr1g0320211	2.5057	1.69023	2.30965	1.38858	1.11645	1.41097	8.56897	9.2186	6.99066	7.2377	14.9438	9.31429	1.85865	1.55867	1.3295	1.09095	9.0245	13.7054	7.19995	5.87099	5.32642	7.61804	6.27537	4.8313	1.9891	1.66721
RchiOBHmChr2g0109971	14.2136	16.6589	11.14	8.291	9.55721	7.294	84.1463	94.9114	86.0169	86.0247	51.0409	51.3864	199.403	195.059	175.058	142.035	178.702	165.045	274.374	241.782	55.9874	49.3952	195.149	199.211	84.4742	76.3889
RchiOBHmChr5g0076841	38.2874	28.7237	29.1658	20.9141	16.8957	19.9535	76.3403	73.1506	63.5341	59.4975	79.0364	76.4859	3.60898	3.55843	0	0	0	0	0	0	0	0	0	0	0	0
RchiOBHmChr3g0449821	8.86118	11.7164	9.63201	6.27501	5.5777	6.2756	20.7635	18.1687	20.9477	22.8536	30.5453	29.3517	82.2969	76.7607	13.1811	14.1062	17.5418	18.1901	18.6506	17.6388	66.7317	62.7937	27.1621	28.7987	23.0914	20.4527
RchiOBHmChr4g0410421	3.99802	3.85365	3.94179	2.61842	2.08078	2.37556	45.2296	41.4351	17.8811	21.6352	16.5775	14.9598	37.7143	35.3973	15.2494	16.1936	49.2255	49.4982	27.3625	27.6443	12.7017	10.1228	78.6572	84.1342	44.1684	39.8231
RchiOBHmChr2g0132341	73.7878	79.9486	80.4028	47.6271	44.0426	49.1485	5.57294	5.47902	4.4024	4.7932	43.8529	44.6765	221.452	225.912	31.5445	26.7244	1.63035	2.46012	2.78707	1.51753	121.947	135.071	11.5715	14.7121	41.417	38.9044
RchiOBHmChr5g0059641	9.87104	11.0811	9.28913	5.95273	6.51272	5.68805	78.3623	87.052	79.4011	80.4466	64.6065	68.8348	101.644	93.5948	285.577	250.13	77.6356	85.3244	93.4604	94.7382	123.228	115.743	113.897	118.058	223.152	229.307
RchiOBHmChr4g0440591	75.2854	91.8697	82.0152	49.7585	49.5434	50.5663	264.232	269.824	316.923	318.973	502.434	479.185	891.028	879.572	143.765	124.202	200.287	195.53	159.332	165.055	944.964	933.924	401.874	386.609	504.961	462.016
RchiOBHmChr7g0205291	490.486	601.169	528.981	319.82	334.915	320.141	1841.9	1783.92	2339.07	2345.49	3589.54	3559.04	5690.89	5738.24	1613.99	1298.33	1029.05	1040.09	856.468	879.034	1669.47	1660.67	1349.47	1406.61	1488.46	1468.88
RchiOBHmChr1g0344481	12.1042	9.38778	10.5429	6.48809	5.06835	7.8094	121.528	122	182.09	180.492	76.7383	72.1485	11.8781	13.7099	69.3429	106.938	130.035	133.793	70.0898	63.7558	134.244	135.95	115.291	111.37	36.5465	33.2234
RchiOBHmChr2g0164361	15.4691	15.4543	22.2072	10.2013	9.28723	12.5821	50.1564	53.1301	49.1744	61.2322	95.3601	93.2167	129.666	106.086	122.832	35.5738	62.8594	75.6279	57.8436	38.8992	74.4855	76.3867	100.445	94.8239	30.7537	45.2098
RchiOBHmChr7g0211781	78.3262	64.7521	68.9717	43.7351	38.9596	45.0181	206.3	181.743	200.874	199.631	453.633	457.915	158.061	161.774	1349.17	918.598	333.797	324.368	277.345	245.896	149.691	126.996	332.405	281.838	329.067	314.929
RchiOBHmChr3g0469291	42.823	59.5561	42.1272	28.9267	31.9536	26.1323	216.836	217.087	268.252	266.462	383.42	367.902	352.874	355.321	240.235	166.618	72.7207	77.2162	50.0967	51.2545	56.5638	54.0573	67.9067	66.4835	38.0677	43.554
RchiOBHmChr1g0380201	16.8357	15.1593	13.4383	9.43781	8.73239	9.21283	40.1251	41.9399	29.4807	35.069	91.8736	93.1243	5.25559	5.06836	1.99359	0.124531	2.25967	2.82935	0.607469	0.341787	33.3464	38.1808	107.827	118.239	43.4242	42.6471
RchiOBHmChr1g0375091	28.0981	21.7188	23.4589	15.0711	13.046	16.0983	2357.47	2334.64	1791.32	1795.68	1310.54	1227.46	188.893	154.628	422.61	331.704	1812.71	1723.31	953.869	965.018	582.111	561.752	1406.68	1264.29	486.641	515.801
RchiOBHmChr7g0196171	2.68763	2.55231	2.5199	1.68597	1.36347	1.62994	0.673895	0.643582	0.766827	0.754296	1.04456	1.04672	0.382956	0.294766	0	0	0	0	0	0	0	0	0	0	0	0
RchiOBHmChr2g0138241	80.5321	84.8155	94.1677	49.8572	52.9915	53.6016	55.1114	55.5948	41.02	41.1298	51.7611	48.5237	75.0873	73.4904	2.77094	4.01459	7.28462	10.5463	2.84849	2.52505	76.5641	76.6755	22.3461	24.466	11.7668	13.2797
RchiOBHmChr4g0391391	9.84077	14.83	10.5017	6.27642	7.1596	7.80104	20.2063	21.3147	39.686	45.5597	42.6695	45.8575	49.1914	51.8132	43.1431	53.1249	35.6469	39.8693	47.2828	51.8261	24.3757	22.9339	42.2557	48.7298	101.239	99.6059
RchiOBHmChr4g0412331	159.506	209.71	191.373	108.795	138.147	90.9348	3097.18	3069.23	4735.22	4685.61	5501.13	5449.88	8039.11	8046.54	756.988	393.304	195.513	328.687	782.638	906.953	742.46	817.385	79.2965	79.8416	183.622	186.535
RchiOBHmChr1g0367231	11.8642	9.86846	9.92003	6.27342	6.67651	6.15242	122.361	129.424	105.796	110.504	107.005	116.625	14.2359	12.2175	61.4849	53.7224	84.2465	85.7145	85.4887	78.3248	53.5802	48.544	95.6057	92.4914	75.0615	75.6775
RchiOBHmChr2g0084401	1.31119	1.12721	1.63676	0.787535	0.735139	0.951189	14.0948	14.1811	16.5981	16.0663	13.2207	11.8002	3.67609	4.74723	3.40504	2.37614	2.81192	0.586805	3.52768	1.98481	5.81863	7.8525	4.77573	4.02613	2.516	1.098
RchiOBHmChr2g0162071	3.25674	3.63479	2.5758	1.95992	1.86448	1.88534	31.171	30.4682	18.3325	20.5057	25.1812	21.8687	11.5668	11.8699	17.2101	18.2757	65.5863	68.4417	60.4406	66.6666	38.6416	36.6061	40.3415	41.2904	55.5924	51.8055
RchiOBHmChr5g0007641	1.84029	1.12032	1.37262	0.675983	0.975195	0.983458	1.37286	1.10401	1.32756	1.1927	1.6309	1.82989	0.139424	0.0989594	0	0	0	0	0	0	0	0	0	0	0	0
RchiOBHmChr2g0142941	17.2156	20.1979	20.7567	13.5846	9.97463	11.5459	1.1848	0.470507	1.10397	0.889536	3.83735	4.86521	5.0288	4.13807	2.00721	1.04307	0	0	0	0	2.68868	1.04574	0.0806321	0	0	0.0535549
RchiOBHmChr5g0057651	3.81416	4.11342	5.00534	2.52749	2.62666	2.6666	24.9571	22.7826	16.6873	22.1907	22.3271	18.8051	11.3972	10.0274	0	0	0	0	0	0	0	0	0	0	0	0
RchiOBHmChr1g0337711	20.9936	23.3748	23.4846	13.223	13.4092	14.4228	23.321	24.724	17.275	16.9554	22.3061	19.973	10.6958	9.52741	0	0	0	0	0	0	0	0	0	0	0	0
RchiOBHmChr6g0278741	78.9632	66.499	68.549	45.1468	39.5905	44.6936	217.199	215.697	144.367	156.365	229.221	235.342	44.9666	43.2146	154.905	123.181	185.734	201.974	137.261	137.525	202.552	178.293	263.863	283.394	242.249	219.004
RchiOBHmChr2g0173441	26.6219	33.5004	29.668	17.5972	19.4131	17.2545	181.353	181.179	163.352	162.312	212.122	209.065	609.763	584.768	114.69	93.9529	142.503	157.302	128.771	135.792	308.146	312.654	254.833	261.122	304.045	304.083
RchiOBHmChr5g0006301	66.0777	61.339	58.6158	37.382	38.4526	36.6604	4.58539	4.27314	8.50212	8.29211	33.3974	33.0642	30.795	30.314	3.70921	7.61103	4.16921	4.28811	15.2511	12.5936	13.7841	10.775	23.5991	24.6025	1.65781	0.847913
RchiOBHmChr1g0370981	23.105	19.9943	25.3145	12.1927	13.8929	15.402	0	0	0.0237634	0.246184	29.9274	34.3747	0	0.0256327	0	0	0	0	0	0	0	0	0	0	0	0
RchiOBHmChr6g0249011	63.0169	48.1432	65.347	38.302	29.3582	39.2294	4985.33	4927.44	2973.89	2974.43	2376.37	2326.03	113.014	106.831	16.3146	92.5216	1619.31	1177.09	393.426	420.862	233.105	253.891	891.149	790.087	35.2963	41.5706
RchiOBHmChr4g0435121	36.9718	36.9163	42.1971	24.3729	21.4279	24.4979	78.8206	77.2289	105.094	101.905	185.203	181.73	72.8791	71.0222	79.6398	113.247	76.5962	74.4838	75.016	71.8569	86.9263	88.207	123.747	129.792	185.57	169.492
RchiOBHmChr4g0428471	9.8154	7.4798	7.24927	5.20321	4.73956	4.92301	49.2119	51.0289	34.843	34.1238	33.6546	39.1489	10.34	10.2851	10.1121	16.1561	106.281	100.805	14.3811	15.4504	162.194	167.324	64.3922	66.749	38.6329	46.227
RchiOBHmChr6g0291901	232.666	178.537	197.172	117.951	113.879	136.668	111.528	107.567	404.713	393.664	1047.74	1027.56	326.173	333.608	88.402	111.1	73.1241	76.4762	37.8107	33.0269	299.763	297.153	183.113	175.128	195.285	190.611
RchiOBHmChr3g0479291	76.157	90.303	78.3011	49.5758	53.9989	44.6064	401.744	397.911	494.639	492.367	607.231	624.6	608.415	601.669	96.0974	69.1148	55.8191	51.4614	42.0426	39.2917	37.1415	35.25	54.2195	57.2203	45.7713	45.1045
RchiOBHmChr6g0255781	19.5814	17.0616	13.902	11.8096	9.06697	9.70994	236.182	233.678	222.406	227.886	102.731	107.004	10.984	11.1952	34.9374	63.566	736.181	749.487	57.7433	62.6084	5.37523	3.20567	250.917	246.235	33.4822	31.5743
RchiOBHmChr7g0180121	341.326	329.749	325.369	199.226	209.555	194.713	120.972	115.009	379.665	363.898	1889.11	1899.78	862.604	864.434	85.6907	70.8498	96.726	102.605	59.9997	57.2338	2036.01	2031.01	550.404	625.046	217.47	207.402
RchiOBHmChr7g0178551	76.1723	111.579	101.267	59.4258	49.9836	65.6972	17.4054	19.8387	53.8182	51.1448	18.6838	19.1951	17.963	18.1685	189.467	231.909	254.623	234.632	184.68	171.856	448.726	459.872	294.906	309.042	868.383	936.742
RchiOBHmChr3g0475661	28.1396	44.2154	32.3738	23.5496	17.9283	22.0163	0.234034	0.193029	1.43516	1.52492	1.45178	1.47546	11.3252	11.1936	4.1378	1.65279	42.4439	51.5416	44.4021	41.5083	227.522	215.981	27.5762	29.4027	894.215	864.543
RchiOBHmChr6g0263801	8.82777	10.6269	11.9927	6.06269	5.77956	7.28999	26.4239	28.7898	19.0814	18.2643	24.5194	21.914	91.0441	94.3548	20.6367	17.4192	17.6392	18.5115	13.3762	14.1883	11.8818	11.8052	24.3768	26.2778	4.97621	8.09541
RchiOBHmChr3g0463271	43.7626	71.9766	50.6467	31.0748	38.7466	31.0876	63.0622	65.3589	38.7098	35.2504	67.5865	71.7992	845.523	842.893	37.6808	27.7368	46.6626	49.9324	25.976	27.7327	84.367	80.902	73.0742	70.7915	22.5948	18.3759
RchiOBHmChr6g0311981	58.1073	69.1683	70.5637	39.4342	38.1698	42.4612	172.729	165.894	199.089	201.227	315.49	299.242	401.877	394.157	16.8601	23.0383	38.2206	38.4347	27.8707	23.8469	236.617	213.843	141.257	142.719	41.5336	33.8908
RchiOBHmChr7g0187601	149.144	214.688	170.991	105.769	114.137	104.562	165.627	165.971	187.811	193.427	234.454	230.792	1747.32	1770.84	1121.69	924.87	496.561	465.621	637.898	624.123	324.57	316.788	612.705	684.449	691.278	637.3
RchiOBHmChr5g0023361	2.97896	3.08538	1.9231	1.64995	1.57302	1.62826	22.5739	19.6826	16.3529	17.7147	7.57457	6.30961	5.86066	5.93447	17.4188	19.1638	717.619	848.94	1262.58	1343.58	1.11145	2.52613	27.8506	22.4715	7.00989	6.78917
RchiOBHmChr1g0356681	24.9813	27.1523	25.7964	16.0492	16.2889	14.9405	84.6424	83.5561	48.7937	52.9702	147.228	142.505	109.384	104.74	123.618	156.25	300.698	294.235	198.727	212.334	230.909	231.624	100.172	120.006	256.42	233.674
RchiOBHmChr3g0472941	3.85901	4.91557	3.94152	2.65309	2.05672	3.04499	5.32164	6.19369	23.3921	20.548	11.3671	13.2272	1.82047	1.44414	10.0706	6.23316	59.989	92.6068	1.19238	3.80166	42.5695	50.5714	12.6034	15.4798	52.5621	38.9686
RchiOBHmChr6g0255241	8.64042	8.92106	8.88212	5.08948	6.16393	4.79711	25.166	23.8649	36.0754	33.2023	44.6386	45.9896	60.3615	63.05	62.4119	56.5724	86.9615	87.5882	157.141	155.026	110.559	104.184	107.86	122.84	97.5548	88.1658
RchiOBHmChr3g0488751	2.48694	2.75737	2.15415	1.70614	1.52735	1.23764	23.2513	20.5168	14.7168	16.1387	27.5266	18.3415	27.9022	26.591	1.36492	2.36485	7.33643	8.49273	5.13533	4.04787	48.5434	50.6869	22.3794	20.6078	7.43136	6.21592
RchiOBHmChr7g0207991	368.867	371.932	405.016	244.287	206.532	246.139	1.33965	1.28172	8.52682	9.09743	96.973	95.8625	0.962385	0.999739	0.704044	1.32913	0.979777	1.41552	0.108059	0.303993	23.3113	23.1044	1.94467	2.77137	4.68987	5.88589
RchiOBHmChr6g0268391	2.48756	1.69502	2.14079	1.16382	1.20984	1.50151	10.7692	11.441	7.052	9.72173	7.68693	7.51487	4.69977	5.26159	18.8483	13.3283	21.8577	24.5585	12.467	11.7326	16.1114	21.5529	19.9512	17.6466	31.9929	33.9668
RchiOBHmChr1g0365021	127.495	130.633	112.063	74.3384	76.6277	74.2403	4.87942	4.12663	4.45536	3.98088	34.6913	36.9114	18.7255	22.4833	48.886	62.1777	14.8868	11.719	11.7377	11.8264	28.961	26.4743	10.8319	13.5808	5.10062	7.07353
RchiOBHmChr7g0185471	2.7611	2.85193	2.27614	1.58312	1.53625	1.69481	24.5558	23.174	31.4363	28.3268	24.1238	21.2775	5.11363	5.67125	5.36725	6.71949	17.9626	17.6521	0	0	56.0211	58.5649	25.494	26.0378	22.2488	23.3801
RchiOBHmChr7g0220131	46.8878	51.3489	42.6004	28.3949	28.135	29.3045	85.4644	84.3111	76.704	76.7971	73.4353	78.2434	53.2106	58.8618	96.0672	97.7548	50.7515	55.1214	33.7145	31.1822	99.9049	103.902	81.4663	74.8771	59.5218	70.344
RchiOBHmChr7g0198351	39.9326	32.0208	35.5769	23.4635	20.2687	21.7997	497.368	514.994	605.516	599.844	546.551	536.419	31.1437	27.6445	37.2855	46.403	457.092	417.048	520.005	568.861	82.6697	62.3717	189.59	176.666	12.8032	16.9073
RchiOBHmChr2g0096651	126.024	89.0689	95.7848	64.4425	62.906	62.1442	191.208	204.099	205.469	212.18	913.055	886.166	76.4793	85.6988	189.2	135.104	360.031	335.056	112.382	106.119	186.613	175.4	284.187	294.925	107.251	123.797
RchiOBHmChr1g0319441	1.75819	1.19802	1.63099	1.04404	0.785301	0.970934	12.4608	13.273	13.6069	12.2854	11.6982	12.0064	1.20491	1.08327	3.99163	3.59164	4.55027	5.07256	3.2515	4.08512	5.91483	4.11746	10.269	10.5178	5.87431	7.14537
RchiOBHmChr4g0387691	31.637	21.5532	25.7723	16.3351	15.3564	16.4765	443.346	434.264	346.453	337.357	282.139	279.919	20.3225	22.4931	107.374	87.943	94.6421	94.3236	107.362	104.956	167.206	147.016	220.816	195.972	77.9333	87.556
RchiOBHmChr2g0130791	26.9551	24.4779	28.8832	15.3294	16.1441	17.6087	17.4154	20.7991	17.6131	20.7786	56.7896	54.9733	38.2479	34.5946	0	0	0	0	0	0	0	0	0	0	0	0
RchiOBHmChr5g0014291	17.8958	21.8745	21.0033	12.2284	12.2894	12.5514	9.01374	9.48159	7.02486	7.20129	5.88719	5.37963	29.7338	28.5374	17.2906	14.0216	16.606	15.4575	11.845	11.3545	22.8403	22.6155	13.0222	13.4354	24.9693	24.5639
RchiOBHmChr1g0331601	13.8692	12.7783	11.2724	7.61758	7.63075	7.90503	124.301	126.57	104.645	102.446	71.9137	79.2237	29.4946	35.2878	33.4071	38.2301	183.119	167.649	118.734	106.759	58.065	45.9805	128.82	118.734	35.9446	46.2303
RchiOBHmChr2g0093961	12.4577	10.3052	11.2665	5.81259	7.3245	7.72472	16.9999	16.9948	16.1422	15.5162	24.4765	27.1139	7.43907	7.20265	21.18	12.0318	10.0788	12.0373	8.37028	6.47315	7.194	6.04273	13.8867	14.7135	19.2597	17.1954
RchiOBHmChr2g0159131	21.274	38.6154	21.7902	18.0601	18.5882	13.154	48.6899	48.3842	31.1154	28.5259	19.7142	19.0019	551.613	535.286	102.29	179.153	823.517	764.138	906.054	986.082	12.9795	7.16252	368.829	423.854	1.23041	1.78986
RchiOBHmChr1g0314261	8.03817	5.29628	8.38049	4.09748	4.42898	4.78535	25.5699	21.7658	37.3189	29.6668	47.6208	53.8776	24.5314	21.6842	0	0	0	0	0	0	0	0	0	0	0	0
RchiOBHmChr5g0040531	4.62746	4.16287	4.40505	2.11402	3.10328	2.87155	48.1789	38.3288	37.5384	38.5898	42.6799	33.8838	33.5933	28.4172	0	0	0	0	0	0	0	0	0	0	0	0
RchiOBHmChr2g0097401	4.40629	4.68615	5.06836	2.60633	2.69463	3.38917	138.368	129.237	127.454	122.424	105.266	88.4066	12.833	12.9698	93.7308	84.1754	147.531	178.373	148.46	191.397	54.1477	63.4196	201.558	178.76	76.5918	79.1524
RchiOBHmChr6g0277581	4.13492	4.47828	3.71158	2.58094	2.51381	2.42285	21.0712	21.5769	17.6124	16.9056	24.6152	24.0905	20.2264	20.9977	35.9043	31.035	31.5472	31.2814	26.2611	31.0274	6.98445	5.63024	45.1714	46.2067	275.818	266.466
RchiOBHmChr6g0305451	14.7154	17.3667	12.6542	8.518	11.5676	7.18143	266.778	281.539	316.803	313.491	474.381	475.521	183.614	181.257	26.7508	34.1836	54.5053	55.7399	27.3827	22.8799	10.3412	8.41571	28.8782	30.8184	42.8061	42.5343
RchiOBHmChr7g0238301	2.22698	2.94708	3.17525	1.4412	1.70992	1.97956	2.44096	1.80603	1.33205	2.39092	2.59429	1.94313	0.920985	0.949774	0.31442	0.296789	0.942437	0.71645	0.723876	1.08609	3.40912	3.35843	0.890458	1.67578	1.1499	0.525718
RchiOBHmChr7g0194241	20.8821	25.6209	23.4144	14.5305	14.2748	13.9282	259.095	259.261	228.763	238.386	321.994	314.46	478.086	474.424	165.525	116.588	166.371	161.699	146.361	143.422	297.466	275.985	255.076	253.244	140.052	152.793
RchiOBHmChr7g0194671	2.39538	3.22739	2.4517	1.30961	1.97381	1.65871	39.642	40.9382	25.6925	28.9384	14.9995	17.7612	18.8766	16.9858	66.9018	49.4812	37.1704	35.0672	27.2374	20.7654	18.9514	23.94	42.7771	44.7305	30.0258	24.7935
RchiOBHmChr5g0061061	11.4614	9.27454	10.5121	6.06087	6.25175	6.83763	163.459	150.648	36.1578	41.0445	36.5818	38.6142	4.19273	3.92297	21.8173	22.1288	127.022	120.084	8.15402	8.83484	31.4504	31.3252	172.429	146.787	41.8021	41.985
RchiOBHmChr2g0131551	18.0289	15.7216	19.3778	10.6772	10.317	11.5656	89.5668	92.5895	86.0084	84.0227	89.5832	88.5342	34.9656	41.7078	63.6257	45.3533	56.8944	62.0839	61.4824	45.7452	42.5679	36.7038	57.0333	59.1108	34.9953	34.0379
RchiOBHmChr1g0356291	5.68839	5.32473	5.71508	2.9277	4.09494	3.20889	19.285	25.5693	14.9985	17.2647	14.1623	14.9441	12.7687	12.3097	17.356	11.6799	15.4577	14.6073	9.72233	10.1953	41.7166	40.1743	19.1469	17.8426	16.6067	17.9685
RchiOBHmChr4g0425351	18.6621	28.5595	22.7075	14.6675	14.6771	13.4227	136.227	143.213	90.1387	94.1734	63.0224	66.3418	220.957	218.912	308.052	249.89	104.75	122.535	52.3587	45.4646	114.431	108.026	217.831	211.4	635.33	646.583
RchiOBHmChr2g0165251	32.1649	31.2566	38.8625	18.3678	19.871	24.696	0	0.0645122	0	0	12.1536	10.9676	1.00339	1.16741	0	0	0	0	0	0	0	0	0	0	0	0
RchiOBHmChr3g0464321	6.41111	7.47831	6.3108	4.00521	4.16662	4.19613	15.885	17.4224	23.9638	23.8056	41.7948	40.8992	48.781	45.4083	18.0272	11.6457	41.7685	44.5778	69.975	72.014	44.3544	43.7082	41.2381	40.1376	66.4201	67.9802
RchiOBHmChr3g0468381	32.0184	22.6772	22.841	18.7431	14.6965	14.0205	21.2191	19.4386	20.3534	20.1181	28.8597	28.6683	2.49772	2.02388	0	0	0	0	0	0	0	0	0	0	0	0
RchiOBHmChr2g0105051	9.2572	10.6784	11.4363	7.13283	5.36181	6.7245	31.4076	31.8438	18.5011	19.4663	47.3351	42.3662	48.2834	47.7606	31.8342	39.9805	33.4718	36.0645	20.9316	20.8596	43.6508	45.4359	60.1044	54.1332	36.7209	27.5799
RchiOBHmChr7g0194611	21.8742	19.1837	18.421	13.2985	11.1926	11.9441	221.37	226.096	170.465	169.964	235.507	246.049	41.1477	40.2851	0	0	0	0	0	0	0	0	0	0	0	0
RchiOBHmChr5g0048991	6.10523	7.09534	6.52063	4.40251	3.97375	3.66943	248.041	229.975	134.285	142.867	53.8118	53.9827	38.9101	35.0811	107.052	105.749	169.785	178.695	196.023	158.422	137.518	141.84	222.852	220.61	95.2185	97.6736
RchiOBHmChr4g0424411	8.90837	11.4178	8.87896	6.509	4.55227	6.87183	209.581	204.534	281.05	275.415	64.2311	60.2169	4.91179	4.49077	165.412	242.002	5827.43	6050.07	10595.5	11622.9	1.64021	0.687349	157.494	137.98	13.5868	14.2564
RchiOBHmChr2g0128641	695.154	719.16	727.136	433.455	415.656	464.314	486.178	468.143	1225.56	1204.44	5363.58	5253.02	9416.26	9275.61	891.381	755.88	635.123	588.574	614.435	613.405	5281.52	5418.64	1001.99	1052.53	1502.19	1537.58
RchiOBHmChr7g0227891	29.804	20.7898	23.0147	15.6804	14.6371	14.8756	11.4643	11.2154	14.9017	15.7929	29.2521	29.866	2.31496	2.57096	0	0	0	0	0	0	0	0	0	0	0	0
RchiOBHmChr3g0467441	6.26823	5.6439	5.87966	3.97718	3.58984	3.33116	131.736	126.665	95.1587	101.82	80.5996	81.8049	19.3979	19.8411	52.8143	51.8529	198.233	178.546	188.919	177.402	62.2529	61.55	96.3123	90.1871	47.2142	47.5905
RchiOBHmChr6g0309971	1.03797	1.08018	0.923372	0.695365	0.568726	0.598963	108.477	122.027	4.8223	7.19561	3.18106	3.33364	23.193	20.9029	4.00735	3.37503	52.8539	56.3437	30.7797	30.4742	12.9045	17.0436	44.3528	40.2904	17.2186	20.621
RchiOBHmChr1g0357461	33.1311	34.743	34.9569	22.1081	20.2959	20.7421	279.695	296.847	333.373	347.603	484.693	462.805	379.74	369.487	212.036	135.473	166.054	172.463	166.94	134.748	201.861	168.586	179.424	180.42	160.539	186.837
RchiOBHmChr4g0410771	1.5303	2.10824	2.1453	1.10363	1.37534	1.06481	8.55507	9.0817	8.04559	6.91659	4.66152	4.04822	11.4017	10.7474	7.61689	3.73744	3.59331	5.22796	4.35377	4.31233	4.02368	4.45435	5.20692	6.12648	0.802761	1.35041
RchiOBHmChr6g0267781	6.444	6.71831	7.12888	3.95779	4.80281	3.67209	17.7157	18.0086	30.8366	30.5736	165.688	166.403	60.7713	66.3031	0	0	0	0	0	0	0	0	0	0	0	0
RchiOBHmChr6g0289741	24.0886	24.6799	25.9811	15.8897	13.2424	16.8728	3.58764	4.05622	3.77764	2.30553	46.0301	46.5071	67.6045	68.4515	73.8336	59.7828	10.4321	13.8193	17.6803	18.4089	106.987	98.3056	33.554	38.9284	11.4372	10.3314
RchiOBHmChr2g0116521	55.4452	48.736	53.8888	32.9586	30.2996	33.9871	128.898	140.459	365.96	354.064	924.876	951.127	568.171	624.069	268.605	232.263	762.706	1016.95	2981.25	2968.97	352.921	361.518	725.178	772.341	1324.08	1451.72
RchiOBHmChr6g0246061	12.2759	18.0436	12.7433	11.0079	8.88822	6.41882	0	0.509307	0.0388376	0.0447056	0.0446275	0.0805451	16.107	13.6571	5.10824	5.99888	0.6369	0.144994	1.9301	1.22608	2.27011	0.436019	2.95011	1.86529	5.08649	7.38553
RchiOBHmChr4g0393101	13.9614	17.4756	16.7555	9.55712	8.55801	11.5719	58.6455	56.698	75.4665	72.4824	2.04922	2.14994	51.0618	54.519	0.471142	3.16865	9.89976	10.5011	12.133	13.4482	0.306033	0	36.7887	33.7413	0.105494	0.393881
RchiOBHmChr1g0377651	38.9058	60.3373	47.6816	31.7571	28.362	30.2297	17.6619	14.0016	20.2756	26.1944	7.93134	4.13785	1011.44	1042.35	56.407	65.7476	205.643	207.56	414.429	410.998	54.4588	30.8752	50.4136	56.6635	10.5936	12.9751
RchiOBHmChr3g0452281	13.4703	11.3719	10.8552	7.67571	7.13247	7.16378	45.8696	60.2848	155.033	166.818	232.673	219.474	25.1137	22.685	454.969	253.642	0.20098	0	2.16119	2.02662	26.4852	32.9184	111.658	113.013	7.11144	2.35436
RchiOBHmChr0c22g0500701	4.07937	4.39409	4.23064	2.95971	2.50475	2.31491	10.6508	11.7423	8.98785	10.0552	9.18668	9.7388	3.52451	4.79299	0	0	0	0	0	0	0	0	0	0	0	0
RchiOBHmChr5g0035341	63.2352	73.0325	63.6068	40.9569	41.6496	40.4397	383.939	388.999	407.303	399.044	446.433	447.664	410.707	429.134	495.24	484.973	698.781	724.166	634.016	636.05	1262.77	1253.23	563.267	596.306	858.82	904.147
RchiOBHmChr6g0285551	26.2558	18.905	22.5457	14.906	13.3533	13.4458	803.555	797.383	607.329	598.033	745.233	750.006	92.1309	94.8291	615.188	418.347	885.685	862.536	832.204	825.977	272.583	250.966	872.313	810.601	345.988	332.192
RchiOBHmChr2g0096891	3.23691	3.63787	3.58874	2.21337	1.99458	2.24095	21.3104	19.0798	11.7865	12.8907	35.6323	33.8924	33.6125	29.0736	4.27532	4.15365	22.7861	19.5326	7.30364	7.33492	40.1355	39.4745	13.9972	15.3145	4.38418	3.5362
RchiOBHmChr2g0105321	8.90162	7.7907	6.32368	5.63798	5.37436	3.04718	0	0.208593	0.863492	1.04627	5.45721	4.68904	1.17414	0.539243	38.9244	47.8314	77.3404	40.6782	0	0	2.61953	4.01798	93.208	96.0397	23.9324	26.1476
RchiOBHmChr2g0160181	4.87593	6.06075	4.67501	2.84347	3.87497	2.88492	19.5697	20.4188	17.2131	13.2625	12.5481	14.5144	18.9386	17.8934	49.118	36.9524	24.3856	22.1119	21.6604	23.581	61.1927	56.6559	33.4245	34.6483	30.469	31.6953
RchiOBHmChr5g0022571	10.221	7.69774	9.22014	4.97186	5.60244	6.2351	14.7829	19.0634	14.8321	15.799	37.3086	43.1561	22.5763	18.148	17.4702	6.42646	10.0109	11.4328	22.1215	21.5206	14.1377	15.119	24.4689	25.1305	27.5165	23.7694
RchiOBHmChr5g0040541	3.14801	2.78652	2.93907	1.76288	2.07274	1.62238	3.30702	3.38423	3.36065	3.29203	3.1867	3.365	2.08189	2.06699	0	0	0	0	0	0	0	0	0	0	0	0
RchiOBHmChr7g0240181	1.58006	0.805065	0.850991	0.69484	0.653179	0.649572	78.6789	82.605	57.0654	57.6567	38.3878	42.6181	2.25002	2.12257	56.4001	42.2184	227.654	215.8	278.75	274.066	6.64407	6.08775	68.4645	62.7124	21.4763	19.3088
RchiOBHmChr6g0257061	11.6602	18.7207	13.6144	7.5824	9.71635	9.87791	19.9314	20.3868	19.9172	17.9425	13.8835	13.4694	92.0698	98.0792	0	0	0	0	0	0	0	0	0	0	0	0
RchiOBHmChr5g0064871	2.79715	4.38019	3.36289	2.16278	2.10191	2.23662	10.126	9.59356	9.66765	10.0735	5.19468	5.79635	7.5593	7.2816	63.0053	37.1172	29.8273	38.4019	36.775	29.2734	9.79502	8.20878	25.6788	26.0955	14.724	16.7444
RchiOBHmChr2g0084961	23.1775	19.9021	21.8169	12.6467	13.3267	14.165	92.2999	93.7685	132.474	128.499	198.638	215.207	85.0169	75.494	28.9071	27.2723	39.2617	44.2086	78.5458	78.3261	156.826	145.757	92.2178	87.0803	38.3925	36.25
RchiOBHmChr4g0396531	6.26279	4.00179	4.64462	3.08514	3.13302	3.00389	4.52296	6.7282	8.02616	7.71852	25.0414	29.3402	2.76296	2.0274	0.31442	0.166944	2.19621	2.27578	3.09457	3.05461	39.4248	43.0577	19.3675	21.3662	2.03285	1.57715
RchiOBHmChr1g0374511	335.237	226.587	260.299	167.039	155.077	185.979	652.337	682.283	1921.11	1915.19	4998.93	5097.48	127.442	137.93	30.9573	38.6171	113.433	70.0406	10.884	10.9914	568.581	447.065	220.004	216.271	148.78	113.579
RchiOBHmChr2g0100421	5.29587	5.41513	5.63986	3.52368	3.3341	3.23063	114.517	107.86	96.8773	96.1914	121.498	111.269	49.0031	46.5165	66.6514	44.7458	62.4039	59.807	58.9903	53.3389	112.67	123.166	84.436	86.9981	33.8814	42.0365
RchiOBHmChr7g0232501	3.24834	3.60624	3.595	2.30639	1.83131	2.32757	53.3254	63.8102	59.1972	60.9685	59.3878	62.8096	21.3073	18.2864	0	0	0	0	0	0	0	0	0	0	0	0
RchiOBHmChr2g0099021	62.9413	67.9801	63.9307	40.9547	40.1119	39.3514	965.242	976.43	626.705	606.76	469.141	509.717	442.736	451.363	447.401	461.358	835.448	865.568	1209.96	1235.03	406.628	424.16	459.801	497.605	344.675	346.087
RchiOBHmChr4g0420271	4.70196	4.83347	5.08001	3.2786	2.68352	3.06961	0.442112	0.441417	5.45887	4.44741	3.81742	3.91535	0.417904	0.47359	3.96307	5.55515	60.3493	44.12	15.8836	19.9988	61.5439	79.3176	4.42534	2.85416	44.9632	39.0765
RchiOBHmChr7g0196941	11.1953	15.0266	15.4996	8.47456	8.65908	8.65959	3.09608	5.19234	2.01218	1.04603	2.46133	2.69229	25.5075	25.6256	80.0505	59.1955	29.4175	29.6852	10.5098	9.46506	18.7593	12.0238	5.21495	3.49532	0	0
RchiOBHmChr1g0384101	25.9404	29.2735	26.7323	17.1838	15.1816	18.36	292.21	298.606	322.975	330.844	309.206	294.884	1049.23	1050.16	95.9285	101.729	165.956	166.804	232.617	239.59	674.833	711.987	225.286	228.882	231.986	198.472
RchiOBHmChr6g0259521	22.0668	17.8461	17.2454	11.7763	12.1201	11.4797	77.5468	72.4095	80.1846	78.702	106.227	103.903	112.804	121.469	14.5864	21.0285	73.4235	91.2661	160.204	174.848	97.2076	102.103	93.2083	77.4527	194.583	209.717
RchiOBHmChr6g0260581	4.94171	8.01812	6.6359	3.46073	4.56183	4.10389	1.17017	1.54423	2.46553	2.20266	3.46736	2.17503	37.028	32.1123	36.9555	14.089	9.32631	10.1663	5.84031	5.36602	20.6729	23.4452	5.80551	7.28372	8.50103	10.5682
RchiOBHmChr4g0435131	20.9167	19.7931	23.1591	13.5999	13.8468	12.0116	58.946	61.4511	67.7495	68.4542	89.0404	93.6702	40.8797	42.6802	57.1496	83.1078	79.0485	87.1212	91.8665	84.0244	37.9657	43.9724	80.6164	81.9629	76.6804	71.9404
RchiOBHmChr7g0184281	4.34208	5.81534	5.13721	3.28718	2.57356	3.63263	2.48464	2.42452	3.25748	3.69898	3.36374	2.48773	2.0052	1.87558	0.0340581	0.180834	4.16726	3.82095	0.0352847	0.198526	2.14419	0.741301	1.9934	2.21029	0.760689	0.811479
RchiOBHmChr4g0433261	4.95695	3.4229	4.39228	2.86523	1.95034	3.13265	0.885232	1.52663	1.94868	1.60222	14.1621	15.6143	10.5646	11.1651	4.22935	4.11694	2.22602	3.68479	0.649137	0.456538	11.0944	12.7144	17.7449	16.3904	5.6162	5.59832
RchiOBHmChr4g0443251	339.698	477.073	366.817	230.794	256.571	245.645	47.4785	49.4989	69.1733	71.3038	122.838	120.367	805.656	825.792	116.28	96.1623	88.7924	121.578	158.823	163.688	297.826	318.792	156.37	180.281	143.877	149.915
RchiOBHmChr1g0370131	11.8652	10.3913	12.5982	6.55082	7.01268	8.10393	27.8647	25.9411	36.0179	34.6426	32.4988	34.9882	18.0235	20.2296	5.39258	7.61321	38.7706	40.8741	33.101	30.2525	17.8581	22.0217	34.046	33.0118	18.5044	17.4337
RchiOBHmChr2g0156741	19.2858	19.9811	18.7258	11.9769	12.223	11.709	165.001	165.474	101.914	101.633	200.77	188.263	181.655	179.278	239.949	138.521	488.549	504.795	272.917	258.325	157.044	151.052	111.347	105.965	140.106	150.924
RchiOBHmChr4g0443991	369.405	524.641	486.73	296.805	285.549	273.262	1.78024	1.34064	0.924956	0.504335	3.02072	1.91826	686.318	670.31	11.8268	44.4766	77.9467	61.2485	51.7425	53.3507	286.844	281.399	112.572	122.36	2.12526	2.64502
RchiOBHmChr4g0398951	30.7412	40.2632	34.0446	22.4864	22.1274	20.4997	589.208	589.806	502.313	489.27	743.171	784.655	1052.66	1046.34	1012.02	621.37	840.287	864.6	877.548	885.682	1363.88	1466.03	1185.37	1285.67	983.979	988.22
RchiOBHmChr3g0483441	5.91138	3.84859	5.39564	2.57066	3.15374	3.73264	212.971	201.618	153.415	165.242	92.8575	95.3963	7.1554	9.5662	12.4134	17.1124	98.804	97.8168	105.008	94.8181	80.242	84.0205	99.2849	98.6516	1.40568	3.35611
RchiOBHmChr3g0482581	153.249	143.286	153.067	96.4959	88.3378	94.0619	1047.99	1126.75	1109.37	1136.61	2891.38	2977.35	698.788	726.395	472.923	425.556	1243.99	1097.23	1083.39	1051.59	1887.56	1760.26	1150.26	1179.13	735.74	772.887
RchiOBHmChr6g0301131	33.8455	26.6805	25.5697	17.9429	17.6635	17.8141	16.7138	16.9729	14.177	13.6004	19.5947	21.0021	15.3929	13.9813	33.1532	22.7603	18.6884	20.1724	14.2009	14.5409	15.1456	16.1236	26.6302	27.6263	119.151	126.353
RchiOBHmChr5g0017631	9.09598	11.6137	10.5078	5.16238	6.17539	8.16784	2.37669	2.50103	10.3091	9.0187	5.09377	5.50535	2.31296	0.889607	0	0	0	0	0	0	0	0	0	0	0	0
RchiOBHmChr1g0358441	12.9985	13.1444	12.2191	8.20887	7.96299	7.60116	22.2567	22.1441	24.6459	24.741	34.3742	33.26	21.0128	19.784	13.1671	23.6541	49.4941	48.9275	28.5549	33.8356	38.5129	33.5966	36.324	40.4894	14.6362	13.4746
RchiOBHmChr6g0279031	21.379	37.6729	29.2866	17.6208	19.529	17.6996	81.7364	87.5671	49.7446	45.772	41.05	38.0298	706.46	688.837	85.7994	81.8704	130.371	148.453	94.9848	91.5711	15.3047	8.44818	80.3022	91.8808	53.7438	60.0989
RchiOBHmChr4g0444971	15.3767	11.7239	13.0613	8.16639	7.68949	9.14835	35.9865	36.4584	27.1886	25.7288	19.513	20.7682	6.00191	5.72001	11.2032	9.61018	12.7769	13.6522	4.84514	5.6678	9.8243	9.77316	27.3313	28.0961	12.7237	12.11
RchiOBHmChr6g0308451	71.7518	64.528	70.5912	45.4138	39.8769	43.2763	1063.49	1081.31	1050.25	1033.09	1356.53	1287.31	141.25	131.494	772.708	717.178	843.677	770.359	554.32	521.72	367.034	258.079	986.125	998.394	45.0444	54.9418
RchiOBHmChr2g0088991	2.88416	4.74064	3.92534	2.30832	2.79375	2.04732	4.52339	5.75476	3.8305	4.38785	5.42715	4.78186	11.8584	10.9313	11.4517	6.08039	6.34819	5.48421	3.51752	2.85124	4.16638	2.4529	8.06727	9.85076	22.8987	27.0976
RchiOBHmChr6g0307221	7.1584	11.3973	8.58103	5.14177	6.06889	5.66628	45.8735	50.221	39.984	43.9705	35.018	37.4229	137.776	132.749	48.8137	32.6909	42.9166	47.4358	25.9102	23.5163	95.9044	98.8778	42.2411	44.0694	30.9933	35.078
RchiOBHmChr6g0252211	294.172	299.359	276.164	177.825	182.702	180.891	13.4296	13.916	44.3121	45.751	499.697	496.484	191.256	196.811	94.476	97.3313	107.737	110.889	121.42	124.012	90.8128	73.8578	173.771	163.147	45.7028	43.7624
RchiOBHmChr1g0352081	6.69114	7.12722	8.02682	5.03687	4.58256	3.92424	48.7234	54.1949	40.9262	41.1153	187.036	179.445	94.4142	96.1411	167.671	345.903	33.244	21.3111	0.321091	0.602195	83.1432	91.2562	331.492	382.353	99.5835	93.5364
RchiOBHmChr7g0239321	2.14982	1.73288	2.26149	1.12294	1.31389	1.4086	38.8308	39.9599	10.5153	8.65504	6.17137	6.56572	1.61432	2.01238	0.437399	2.13661	22.8404	21.7392	2.0845	2.12468	4.86491	6.26755	20.398	16.0444	1.23402	0.548506
RchiOBHmChr6g0282801	26.5527	29.194	24.4507	18.8454	15.5441	15.5037	120.923	121.615	48.1706	51.0308	37.1712	35.4932	72.7429	68.0127	35.2695	63.323	232.607	172.527	109.117	93.8449	21.238	15.0588	50.2288	40.4683	10.1157	15.9588
RchiOBHmChr3g0452181	95.8272	114.792	103.444	67.2603	64.0715	64.2169	147.146	143.117	137.768	126.079	253.079	246.607	774.39	806.719	90.0393	136.932	90.1824	101.86	152.164	132.398	445.45	466.759	158.075	174.258	136.256	126.578
RchiOBHmChr2g0090981	47.7553	34.0228	39.0812	26.5399	22.0998	26.714	1.59607	2.41343	15.3588	16.5624	240.235	237.09	1.95649	2.9597	11.4429	19.9592	25.7907	15.1782	8.85107	12.5254	230.847	210.231	14.8105	18.2624	13.8776	13.1809
RchiOBHmChr4g0410481	12.8453	13.9057	14.292	7.7938	9.05297	8.74101	33.5399	40.3986	29.1341	31.6112	63.3336	67.7569	79.1435	74.5066	65.3835	29.4847	34.9004	38.777	42.1689	37.0295	75.8108	65.5244	42.7461	39.219	97.4499	95.7198
RchiOBHmChr7g0214991	7.85253	14.3507	11.3936	6.89903	9.23342	4.73301	0	0.0291148	0	0.0127781	0.0127558	0	10.3096	10.1421	0	0	0	0	0	0	0	0	0	0	0	0
RchiOBHmChr1g0370111	29.7077	32.8956	32.2865	19.3061	16.2901	23.6768	278.844	273.593	453.615	418.107	244.509	218.333	30.8742	31.7188	53.1815	105.201	119.122	112.445	138.041	141.942	84.9122	66.0779	177.8	168.117	30.2426	37.679
RchiOBHmChr0c32g0501581	21.7965	33.4343	24.9671	16.6112	15.4905	17.947	2.78647	2.4981	1.14297	1.05253	0.525343	0.553091	49.9404	57.5344	0	0	0	0	0	0	0	0	0	0	0	0
RchiOBHmChr2g0097681	1.58278	1.85063	1.72057	1.1918	1.08381	0.919561	11.2042	10.685	10.4969	9.29455	9.19397	9.743	13.4748	9.81828	6.13366	8.32272	8.75472	8.08438	8.35509	7.9452	11.68	12.9796	6.86259	7.37149	7.61087	7.2644
RchiOBHmChr4g0434331	10.1184	11.6027	9.42885	6.4408	5.71655	7.31845	56.3566	64.6295	63.1827	62.5987	78.3906	80.1185	52.654	48.5779	35.5948	43.4835	128.307	116.355	60.3262	54.3801	136.191	147.012	119.16	112.802	82.471	85.5042
RchiOBHmChr3g0477541	4.03719	6.58299	4.37779	3.25495	3.23984	2.8296	2.03533	1.99848	1.64587	0.84202	1.61105	0.821735	38.2117	29.1946	4.7163	4.80798	35.2606	39.2572	38.2098	32.0735	133.319	136.958	11.0417	11.001	195.93	208.302
RchiOBHmChr1g0380721	51.9537	57.4007	57.2114	34.1923	35.1772	34.6052	2.51681	2.71456	2.48749	2.32269	7.79542	8.69417	61.1196	58.8046	0.349919	0.571669	4.30486	4.64333	2.37034	2.06584	30.4745	29.7816	21.5986	21.0127	0.316415	0.573822
RchiOBHmChr5g0001991	22.5613	23.868	22.2904	13.7144	14.3212	14.9137	4.57444	4.46826	2.7554	3.35181	9.07903	8.35529	12.5166	12.9481	0	0	0	0	0	0	0	0	0	0	0	0
RchiOBHmChr2g0085301	4.18621	3.50412	3.48729	2.77874	1.90018	2.29562	80.1298	85.47	291.018	313.615	79.4097	76.9159	6.05423	5.87561	122.694	119.239	4210.96	4095.13	7424.87	8233.99	13.6892	9.37238	122.122	100.647	14.0439	18.9338
RchiOBHmChr7g0199531	14.6697	18.5776	17.2638	9.31673	11.0704	11.1931	0.627756	0.549466	0.322308	0.259704	0.86108	0.83554	33.9324	30.9507	1.62089	2.30383	0.348365	0.706931	0.0258349	0.0847919	1.6746	1.40215	1.53016	0.985076	0.381081	0.28144
RchiOBHmChr7g0195651	6.25494	6.87887	6.86812	4.30314	3.7402	4.46715	51.6928	62.9099	32.209	33.237	20.3776	15.4028	44.3118	40.7921	51.2471	40.7217	29.2627	23.6251	12.8783	10.4815	60.4172	69.4487	37.972	36.8395	19.5753	15
RchiOBHmChr4g0438441	5.91281	4.41447	4.47822	2.91505	2.47373	3.91475	251.345	250.994	237.253	239.12	186.454	172.927	4.80982	5.27235	75.3354	51.6775	250.343	226.659	257.035	265.684	98.1572	94.5861	357.94	336.123	143.192	131.287
RchiOBHmChr4g0433271	3.74925	4.88188	3.16257	2.77734	2.59256	1.95678	50.7528	44.7098	35.8011	31.3246	16.2294	13.3045	16.2505	21.4852	18.0124	29.1591	142.997	113.184	10.6991	10.1884	8.98805	4.79178	57.7385	61.9684	31.9024	34.1329
RchiOBHmChr5g0035381	14.8098	16.529	14.7959	10.4413	9.58474	8.7216	44.7537	44.6316	41.7401	48.0466	45.5645	49.4416	61.5591	62.1095	0	0	0	0	0	0	0	0	0	0	0	0
RchiOBHmChr3g0483571	86.039	112.426	90.9908	62.2683	58.0002	60.6043	118.581	122.971	229.534	233.11	336.396	337.291	217.582	206.188	55.9562	64.1481	119.982	131.537	224.18	246.681	161.477	137.421	102.243	86.1256	5.63055	11.377
RchiOBHmChr2g0138631	5.25477	5.37776	6.07227	3.55507	2.94144	3.96447	28.1856	29.4478	12.0434	10.8097	16.1295	17.0839	43.5054	40.3052	7.54608	6.76799	10.365	9.62594	3.24864	3.44263	31.7788	34.9579	11.5038	10.838	4.82491	4.63555
RchiOBHmChr3g0480751	128.155	120.297	124.274	76.1087	78.5557	78.3142	477.731	484.067	527.122	516.439	581.125	584.121	334.946	339.528	282.292	342.387	124.42	120.41	147.029	150.37	212.525	219.617	339.75	392.859	12.1971	11.8286
RchiOBHmChr6g0266111	92.7216	130.312	99.5681	64.9587	74.0025	62.7162	136.959	139.486	144.949	144.729	218.097	217.185	968.226	959.37	317.717	205.545	294.867	311.813	295.772	292.397	256.157	244.571	297.517	327.982	420.274	451.168
RchiOBHmChr6g0248961	63.4626	48.1732	63.5295	36.9629	32.8692	39.7772	2644.8	2686.88	1320.25	1318.11	973.987	973.651	163.981	153.096	40.8746	100.5	408.042	293.765	61.5657	80.1836	187.392	174.797	292.812	243.679	46.7557	51.8489
RchiOBHmChr4g0444831	17.1924	18.4177	20.3836	11.4357	11.2828	12.3528	68.2083	69.7568	50.0262	53.5098	5.19177	5.69944	53.2663	45.1187	439.666	474.848	233.185	204.155	56.975	59.3092	17.4701	16.93	38.7157	52.6059	291.04	302.609
RchiOBHmChr6g0286921	1.1693	1.48593	1.16777	0.900485	0.720492	0.76274	80.8468	88.1103	254.342	263.845	32.3345	35.3221	1.81246	1.38453	142.545	127.603	5625.26	5273.65	8382.02	9010.13	1.36264	2.07838	114.446	101.595	13.4699	18.5843
RchiOBHmChr2g0163661	1.79825	1.51881	1.70292	0.91391	1.11515	1.12663	2.04729	2.02027	5.72542	5.01564	2.75444	3.10558	0.0625318	0.0434044	0	0.00944578	0	0	0	0	0.168001	0.104871	2.39318	1.84056	0.271866	0.111545
RchiOBHmChr4g0427111	1050.5	883.13	889.399	606.221	583.543	577.58	230.892	228.455	424.373	422.1	1048.41	1076.79	339.078	318.409	65.3789	95.6493	670.164	783.513	1027.88	1172.31	233.81	162.255	311.371	333.726	139.265	142.518
RchiOBHmChr3g0458031	5.23168	4.14875	5.50614	2.94191	3.72149	2.63156	40.0474	34.8478	23.2314	20.0796	26.7884	19.779	14.4091	18.9921	13.7486	8.17054	24.3045	24.6499	23.7831	20.0965	20.3818	19.1034	32.7451	28.3536	25.0583	19.7717
RchiOBHmChr1g0364451	30.8044	32.1066	31.8754	19.5559	19.8429	19.9933	82.3469	84.7422	80.9846	76.8532	113.458	114.824	75.8255	75.8737	39.5181	49.7313	66.3177	55.012	88.5046	97.4431	130.716	135.442	100.372	94.5689	23.3357	30.1346
RchiOBHmChr2g0114541	29.1907	30.1538	28.3316	17.592	18.4222	18.9671	104.421	101.896	181.212	178.994	93.3491	101.138	15.1225	14.7634	14.0885	22.3682	12.7335	13.148	9.28294	9.59659	28.398	24.5656	61.3875	67.1179	24.7613	24.7889
RchiOBHmChr7g0237721	37.4879	34.8099	36.5022	21.7931	23.23	23.248	179.772	176.772	132.153	140.121	150.244	146.814	121.735	122.377	101.162	75.9891	110.477	117.856	71.1268	70.8454	114.628	109.928	226.64	220.968	177.863	166.088
RchiOBHmChr2g0087891	1.86446	2.21453	1.74354	1.19887	1.14517	1.31476	48.2859	49.7503	29.8843	29.3736	15.7203	18.1101	31.1363	27.7348	38.7357	32.5246	48.964	47.2717	43.3973	39.9658	26.6238	26.6877	78.6623	69.5469	58.9483	62.037
RchiOBHmChr6g0300921	27.3041	24.651	20.1369	15.589	14.617	15.0259	155.681	160.852	236.49	241.339	148.565	140.865	34.1613	34.988	10.4957	15.7532	265.285	261.503	0.303735	0.341787	183.897	170.378	151.943	172.286	79.611	80.5147
RchiOBHmChr2g0122231	6.92072	7.67978	6.92674	5.11234	4.25487	4.10075	139.683	121.436	64.6746	77.9604	77.4345	90.6304	87.0197	94.8866	91.154	66.1421	142.773	150.486	111.657	122.382	73.9834	77.9081	257.163	260.495	120.523	145.464
RchiOBHmChr5g0000611	3.81399	4.96618	4.83252	3.21649	2.39757	2.91606	4085.41	4070.51	2251.29	2304.36	152.921	155.528	32.6118	33.7965	886.704	910.789	464.95	499.025	421.703	418.758	99.5473	58.2036	483.038	501.402	21.7309	29.9177
RchiOBHmChr1g0348371	3.2157	2.24312	3.30765	2.01849	1.71509	1.7655	46.6936	44.1825	51.2439	52.3092	55.5875	55.8896	2.15384	3.50953	10.9965	9.46151	22.8485	19.0592	24.2607	25.2922	11.4689	6.96898	18.4794	17.1341	8.02082	7.85025
RchiOBHmChr7g0188731	249.408	271.717	260.458	160.676	157.183	172.781	900.638	941.559	715.469	740.526	1079.34	1123.36	2114.61	2088.18	525.335	404.096	780.418	805.099	772.463	754.082	1385.47	1312.9	909.697	869.759	981.038	976.076
RchiOBHmChr6g0301991	6.32284	5.23362	7.91736	4.73087	3.11693	4.38468	172.176	169.552	298.847	295.332	308.984	311.472	41.7636	41.4862	123.417	101.745	141.19	133.301	142.205	158.527	44.111	28.403	140.973	146.568	135.355	122.797
RchiOBHmChr4g0420871	19.9479	13.2256	15.692	9.67051	9.27844	11.7951	503.984	505.757	812.639	805.153	355.243	349.626	13.2638	12.1924	0	0	0	0	0	0	0	0	0	0	0	0
RchiOBHmChr5g0049211	26.6991	28.9845	25.836	17.5417	17.4433	16.1783	241.694	252.903	218.101	224.201	300.351	287.028	223.394	236.953	258.449	292.041	236.166	217.408	190.443	204.734	388.596	395.793	258.514	263.912	404.028	392.961
RchiOBHmChr3g0460261	4.53352	5.05978	4.78914	3.30454	2.71245	3.00423	67.187	66.151	178.343	179.614	58.9781	52.3585	4.9994	6.34545	20.4813	25.5354	535.703	392.664	38.9014	39.1322	1.19392	0.13759	64.4493	63.6412	4.63692	5.04165
RchiOBHmChr4g0430551	3.00725	2.61992	2.74842	1.81121	1.60327	1.85773	258.313	283.865	250.093	251.568	122.897	116.798	47.2746	41.6913	107.595	73.9403	150.127	156.145	137.288	130.876	141.66	126.427	198.025	188.196	232.63	231.802
RchiOBHmChr5g0077011	1.8275	1.80201	1.90271	1.27389	1.07073	1.12565	62.8587	65.4276	56.5868	54.0865	35.1239	27.2431	10.6486	12.6709	79.5483	79.0772	67.4134	56.1154	20.0465	24.1149	7.17788	9.5718	56.0909	59.0095	41.1266	34.8039
RchiOBHmChr7g0201611	155.493	155.323	146.989	95.3492	95.2324	97.2087	292.036	285.53	219.691	219.944	253.997	245.391	170.053	167.071	0	0	0	0	0	0	0	0	0	0	0	0
RchiOBHmChr2g0093671	3.46923	2.54378	3.87629	2.155	1.86386	2.21476	42.0915	44.3741	53.2259	49.4789	58.1015	58.866	0.408731	0.231598	5.74768	2.89301	9.25061	8.01577	10.2228	13.3949	0.592634	0.451961	41.1493	35.7481	3.82742	3.3747
RchiOBHmChr3g0469241	2.92161	3.34028	3.59388	2.25357	2.04937	1.8692	0.180907	0.182368	0.0126424	0.145525	1.27838	1.2454	1.95973	2.38646	0	0	0	0	0	0	0	0	0	0	0	0
RchiOBHmChr7g0198931	5.29555	7.53397	7.78525	3.28281	4.44464	5.32489	0	0.027078	0.0206486	0.0713051	1.51852	1.62727	34.928	37.9085	0	0	0.0307834	0	0	0.124164	20.1156	26.0213	0.874721	1.53264	0.300478	0.200338
RchiOBHmChr7g0177111	4.60542	4.30368	5.00595	2.76216	2.92943	3.08562	59.186	53.4124	44.5458	42.0322	35.5349	36.8981	19.1851	18.7606	59.7985	40.3169	52.9824	54.0822	39.6893	36.6844	40.7017	43.1488	69.9968	68.7705	65.5332	65.4319
RchiOBHmChr1g0362111	2.12685	1.72467	2.02889	1.16459	1.47278	1.05417	9.17896	11.6264	13.2369	12.911	16.4896	13.5977	25.6809	25.6652	18.0579	9.35082	9.15995	9.23699	9.5194	6.19907	69.1627	76.2131	13.7942	11.2828	13.5766	14.4831
RchiOBHmChr1g0368611	19.153	10.571	15.6561	8.81331	9.74749	10.0513	49.6162	48.0526	60.1592	62.0794	65.7686	69.2263	3.02549	3.26367	30.0791	33.4253	50.7142	56.0619	70.0259	71.9076	11.2309	11.0658	49.6102	45.3764	16.1723	17.2701
RchiOBHmChr6g0304901	1113.28	1302.39	1089.53	722.617	726.651	758.039	938.888	921.472	1484.06	1519.24	3957.62	3979.16	15087.6	14807.9	9619.95	6809.48	2093.52	1743.26	1501.01	1651.85	5607.42	5154.05	3235.93	3437.34	702.146	643.419
RchiOBHmChr2g0097381	17.4496	23.6012	19.5952	11.9065	14.4738	11.7633	19.7871	15.8381	14.808	16.7432	34.876	33.5962	287.465	281.736	0	0	0	0	0	0	0	0	0	0	0	0
RchiOBHmChr1g0378211	8.3736	11.2926	7.68691	4.13777	6.70318	6.43838	41.3814	38.6004	38.1881	39.3214	40.4098	40.0007	34.1263	40.2732	27.5682	29.1478	46.7695	43.2336	28.3128	24.3373	46.9117	42.8292	54.6525	39.7957	45.0883	44.6417
RchiOBHmChr2g0123591	12.2929	13.9036	16.1988	10.0381	7.86562	8.77118	46.0696	41.777	48.5261	53.9751	73.9294	68.1689	91.5091	90.2358	0	0	0	0	0	0	0	0	0	0	0	0
RchiOBHmChr4g0427101	2646.71	2183.71	2074.15	1429.51	1392.94	1530.12	1200.74	1187.18	2112.12	2055.51	4994.01	4848.81	1480.54	1480.25	302.117	421.59	2760.09	3337.34	4321.13	4376.24	938.815	714.561	1381.7	1330.42	678.014	726.9
RchiOBHmChr1g0363191	2.79206	1.8342	2.75815	1.90314	1.39968	1.33672	37.0865	37.3969	44.2934	45.2693	30.5783	28.0365	1.36418	1.51504	2.05695	5.5638	25.3889	22.3792	6.07143	7.4655	10.0586	11.8967	34.2197	35.1888	0.273736	0.194675
RchiOBHmChr4g0440501	27.7191	40.3269	31.585	20.739	22.3124	19.7048	8.26405	7.8822	10.2887	9.32732	10.7659	10.351	20.2242	20.6436	11.4456	11.1687	15.7956	14.7028	14.5071	13.0829	18.9773	18.628	14.0755	14.625	24.1455	24.0508
RchiOBHmChr3g0480621	3.56217	3.80281	3.57666	2.33318	2.08106	2.5037	13.6373	16.4933	11.7111	10.4902	16.8687	16.8047	14.9151	12.7214	143.251	104.485	51.517	53.1127	44.0272	45.5632	7.23096	6.24982	13.734	16.6842	112.889	110.504
RchiOBHmChr5g0000891	14.2415	19.4249	13.5885	10.9111	9.1463	9.73659	54.8234	49.8595	42.9935	42.4138	18.2136	18.3699	26.9531	27.6206	201.106	203.911	310.954	300.231	324.745	301.513	35.4358	31.4273	290.94	313.817	804.949	791.953
RchiOBHmChr2g0097021	17.8769	23.798	22.8174	14.0305	13.5484	13.0967	14.9868	18.386	15.621	15.5246	19.2441	21.3619	42.3205	38.6556	0	0	0	0	0	0	0	0	0	0	0	0
RchiOBHmChr7g0189111	24.1462	29.1812	26.3936	17.0073	16.9084	16.391	8.01687	8.62007	4.46504	4.31842	4.20956	4.67988	28.1006	28.915	12.5655	13.9889	18.0815	14.2305	12.2855	12.9546	25.3802	23.5339	19.9536	23.3802	27.8799	29.5547
RchiOBHmChr1g0365061	2.99624	2.95217	2.95765	2.10082	1.78786	1.71355	3.48639	2.94089	4.51842	4.30238	5.13475	5.04709	3.93034	4.58717	0.694034	0.709709	3.96245	4.1862	0.71903	1.29857	2.15774	2.05146	3.68844	3.14297	4.41167	3.06227
RchiOBHmChr5g0059531	6.93754	7.02636	7.1902	4.23049	4.10074	5.07852	3.04934	3.39196	3.22586	2.38528	2.6682	2.72023	2.20819	2.33825	0	0	0	0	0	0	0	0	0	0	0	0
RchiOBHmChr5g0027441	20.8515	18.6436	23.2032	13.103	11.753	14.8092	15.453	21.3147	13.0278	14.2821	12.3086	10.2498	17.0961	17.4877	35.2624	26.3683	21.9501	23.9326	12.7963	12.2482	17.795	17.5279	28.8782	36.1153	38.217	40.7687
RchiOBHmChr2g0148981	3.26541	4.0605	3.13466	2.21756	2.8963	1.45534	14.8275	11.0649	16.6849	17.015	62.9842	64.0084	101.447	100.731	77.8467	66.1959	111.13	120.673	225.781	301.37	874.204	836.069	446.587	511.329	3158.23	2781.28
RchiOBHmChr5g0033921	11.3777	12.739	10.8069	7.08397	7.57503	7.40638	13.1538	13.9247	12.139	13.0534	18.5686	18.654	19.0294	18.3759	14.0379	14.7801	38.3458	28.5288	31.4421	28.7869	40.9252	45.8609	32.6409	30.7202	549.113	535.966
RchiOBHmChr3g0491871	5.8849	4.42337	5.05827	3.59289	3.66165	2.39331	6.09805	5.08548	4.13367	5.19971	9.64673	11.1358	4.34599	4.41288	0	0	0	0	0	0	0	0	0	0	0	0
RchiOBHmChr7g0240021	3.04718	3.16421	2.65471	1.71728	2.36811	1.49799	17.7578	17.9964	32.1993	28.9266	26.8281	30.3704	142.418	135.854	244.62	291.2	193.165	152.149	435.813	514.239	256.482	253.612	356.587	359.511	78.6705	83.6927
RchiOBHmChr4g0425861	231.231	179.929	223.384	134.972	117.847	148.277	11.0104	10.3167	26.1467	25.1598	223.072	219.302	5.58714	5.17804	1.10103	3.04652	3.39152	2.74997	0.851499	0.647823	23.6753	15.5125	9.16427	9.39307	0	0.17502
RchiOBHmChr2g0169911	19.0603	25.7125	21.0121	14.6199	12.9716	13.9528	57.4657	63.9352	67.9883	66.8257	40.1549	39.2317	172.25	167.117	61.3783	55.8012	56.4036	66.8096	71.721	73.9278	111.647	115.58	91.8022	87.0551	107.651	99.3904
RchiOBHmChr6g0310441	9.92842	9.89951	9.88289	6.55183	5.7135	6.52422	21.3346	23.1989	33.9441	32.9927	59.243	63.2682	30.3657	32.069	22.957	24.8252	54.7155	59.9189	72.4722	76.1043	30.9933	28.3957	35.458	38.3515	34.687	34.5537
RchiOBHmChr6g0281001	2.06683	2.49672	1.96215	1.16387	1.49033	1.48332	14.4773	14.2474	12.1579	14.5904	9.63065	6.7059	51.0025	42.6913	11.1277	15.3872	5.86179	5.891	1.99053	1.71103	8.40004	8.05891	10.2025	10.0896	2.25858	2.71055
RchiOBHmChr6g0301731	4.04815	3.57565	3.29619	2.52609	2.29497	2.06043	65.7418	64.7145	52.121	46.9573	43.7806	42.7117	29.189	33.3226	54.6665	43.7336	60.9344	59.4403	48.5083	45.726	42.1844	46.5761	63.6401	61.2154	53.5997	62.4045
RchiOBHmChr7g0242021	8.9705	8.70075	8.14131	5.42196	5.57866	5.31591	68.757	67.3357	76.4748	78.1261	52.2023	49.6099	56.4504	52.9316	187.155	164.035	94.0586	113.608	106.252	105.932	32.5941	34.368	91.298	97.4544	56.7195	58.6517
RchiOBHmChr6g0253001	5.8263	6.26617	4.47095	3.68969	3.4711	3.29572	33.1089	36.8213	23.3047	23.3644	17.5359	19.1766	29.4399	30.2061	15.3552	11.0559	20.1734	19.7163	14.9441	14.9177	46.0775	45.2586	25.8615	26.6416	13.3327	15.5358
RchiOBHmChr2g0140741	1.52698	1.57799	1.66134	1.03124	0.888793	1.104	18.6826	17.7731	12.4848	12.2193	12.3514	8.99996	20.6985	21.3887	19.7321	16.1268	10.9486	15.5783	18.3022	10.8395	14.9593	12.4611	19.7003	17.1986	23.9243	26.299
RchiOBHmChr7g0182571	76.8034	61.2435	63.9018	41.9096	44.083	41.8251	796.736	798.464	997.749	962.944	1338.14	1312.07	657.39	668.135	665.961	694.013	1075.25	1263.65	1855.14	1900.48	434.217	389.494	1044.71	1093.25	448.905	465.884
RchiOBHmChr4g0432641	6.51493	7.03495	6.41794	3.89999	4.36897	4.39037	19.5716	22.873	28.3746	29.0593	40.7079	35.3075	29.164	26.6909	164.779	94.21	161.741	264.83	221.486	226.2	682.72	777.645	58.2111	77.7946	869.762	887.997
RchiOBHmChr3g0466001	5.51628	6.33904	6.59461	2.86391	3.19796	5.73311	56.6669	49.4875	49.923	49.9244	62.1836	43.4793	41.6922	43.5326	40.5514	30.3588	39.655	35.2214	44.7427	33.0926	29.1466	44.3155	117.715	55.4943	46.7159	48.0553
RchiOBHmChr3g0472851	149.69	158.205	158.39	101.64	97.7503	95.7873	272.269	284.245	274.485	278.587	307.134	307.483	1312.38	1283.38	101.746	137.86	200.412	235.263	409.623	393.81	1303.15	1394	202.067	214.854	419.369	390.339
RchiOBHmChr3g0462931	73.175	93.5212	70.0873	49.7454	54.3197	45.818	853.269	854.302	860.884	843.5	1182.87	1161.25	1231.81	1254.59	320.001	189.346	78.7087	84.035	76.3845	72.8633	71.9382	57.5658	103.683	89.7507	150.628	145.913
RchiOBHmChr7g0220251	13.5254	15.9743	14.11	9.32253	9.65334	8.59914	105.304	113.197	97.7241	93.46	128.043	124.878	468.358	467.807	508.213	439.962	212.607	297.066	180.817	167.671	231.209	231.699	185.089	211.056	92.1156	94.0024
RchiOBHmChr6g0302781	12.2655	7.90576	9.76187	6.89394	6.36404	5.68503	190.435	192.265	192.213	199.275	174.377	184.291	19.246	24.9175	31.0962	36.5321	95.5516	95.5882	115.807	120.74	52.6827	44.6912	153.019	135.84	92.7827	76.1765
[truncated: 1,730 more rows]
