# Supplementary material for: Identification and Characterization of Transcription Factors Involved in Geraniol Biosynthesis in Rosa chinensis
Source: Int J Mol Sci. 2022 Nov 24;23(23):14684. doi: 10.3390/ijms232314684 (PMC9739587; doi:10.3390/ijms232314684)
Supplement: Supplementary file 1 [file ijms-23-14684-s001.zip › Table S9.xlsx]

## Sheet: Table S9
Table S9: DEGs information of the green-module in four stage petals of R.chinensis 'Old Blush'.
Gene_id	FB_GP	FB_CP	FB_PP	OF_PP	Gene_description
RchiOBHmChr2g0142051	0.143495	0.108342	69.935	328.013	Geranyl diphosphate phosphohydrolase
RchiOBHmChr2g0142071	0.0859579	0.173081	17.1674	294.735	Geranyl diphosphate phosphohydrolase
RchiOBHmChr2g0142081	1.6921	0.447869	211.726	915.356	Geranyl diphosphate phosphohydrolase
RchiOBHmChr2g0142111	0.865822	0.934044	304.537	1427.8	Geranyl diphosphate phosphohydrolase
RchiOBHmChr7g0228621	13.287	11.6837	342.927	967.195	Putative transcription factor MYB-HB-like family
RchiOBHmChr4g0389611	2.38845	1.14726	0.382494	935.965	Putative transcription factor interactor and regulator AUX-IAA family
RchiOBHmChr2g0116041	1.50525	1.09111	13.1437	895.997	Putative transcription factor MYB-HB-like family
RchiOBHmChr6g0257641	55.4291	39.9863	60.8342	393.312	Putative transcription factor bZIP family
RchiOBHmChr4g0429461	50.1716	49.2725	14.3241	363.297	Putative transcription factor NAM family
RchiOBHmChr4g0434111	4.73633	2.49027	1.52808	281.239	Putative transcription factor C2H2 family
RchiOBHmChr7g0241861	36.8955	59.0123	15.5368	268.463	Putative transcription factor MYB-HB-like family
RchiOBHmChr1g0337011	19.8321	12.2687	7.71982	254.086	Putative transcription factor bHLH family
RchiOBHmChr1g0373641	9.49504	9.56598	14.6095	185.85	Putative transcription factor AP2-EREBP family
RchiOBHmChr2g0170351	10.6482	26.6279	26.4303	124.606	Putative transcription regulator A20-like family
RchiOBHmChr2g0149701	1.38437	3.4534	0.126137	107.233	Putative transcription factor interactor and regulator Znf-B family
RchiOBHmChr4g0437871	3.93094	0.292513	0.315241	98.8299	Putative transcription factor SBP family
RchiOBHmChr4g0393021	9.24847	11.6582	10.1289	89.7673	Putative transcription factor interactor and regulator CCHC(Zn) family
RchiOBHmChr1g0363241	10.6498	12.7515	11.2251	56.9817	Putative transcription factor ARF family
RchiOBHmChr3g0455241	0.111569	0	2.68777	9.40645	Putative transcription factor Hap3/NF-YB family
RchiOBHmChr2g0143591	4.47704	2.16762	3.1174	6.58474	Putative transcription factor interactor and regulator FHA-SMAD family
RchiOBHmChr2g0088491	0.836523	0.545877	0.175643	6.48145	Putative transcription factor C2H2 family
RchiOBHmChr2g0152501	91.2989	283.186	6314.2	15315.9
RchiOBHmChr4g0387801	7.93015	7.14615	7.90037	14581.3
RchiOBHmChr5g0077961	3.95081	13.6972	100.044	8799.62
RchiOBHmChr7g0213931	34.7101	30.6529	706.983	7289.32
RchiOBHmChr2g0142121	4.50675	3.76748	1300.31	6580.5
RchiOBHmChr7g0232341	89.3805	69.0343	103.295	6338.52
RchiOBHmChr3g0458761	264.888	518.186	824.291	5007.05
RchiOBHmChr5g0059511	2.21021	2.06165	58.7668	3874.02
RchiOBHmChr1g0360721	1.8604	1.68353	2.05423	3744.08
RchiOBHmChr5g0039691	43.0832	84.8166	785.612	3731.7
RchiOBHmChr7g0198901	179.311	226.959	235.18	3727.72
RchiOBHmChr3g0488551	17.8792	362.179	551.509	3390.7
RchiOBHmChr2g0100891	54.7137	79.95	106.598	2678.48
RchiOBHmChr2g0159041	62.5197	324.629	1280.77	2451.57
RchiOBHmChr5g0002761	159.362	224.616	294.566	2376.11
RchiOBHmChr2g0112071	1.31449	2.71485	73.6103	2189.9
RchiOBHmChr2g0152071	0.821238	0.754491	1.64505	2062.68
RchiOBHmChr4g0435971	39.6717	21.6342	37.1059	1947.11
RchiOBHmChr1g0316461	696.768	1353.26	964.386	1840.54
RchiOBHmChr3g0462531	205.813	261.085	181.607	1804.51
RchiOBHmChr6g0310241	16.7767	15.303	23.9591	1651.17
RchiOBHmChr6g0274441	216.849	330.8	383.629	1599.85
RchiOBHmChr1g0382801	45.6709	37.0838	13.6891	1588.66
RchiOBHmChr6g0284551	30.4577	55.0087	250.559	1425.81
RchiOBHmChr4g0441041	1.06738	0.42857	0.394678	1313.04
RchiOBHmChr2g0093301	27.4989	40.4375	29.0591	1274.12
RchiOBHmChr5g0031161	544.834	516.929	1271.21	1099.99
RchiOBHmChr2g0130851	65.6809	30.656	6.59802	1078.88
RchiOBHmChr7g0189511	2.23758	0.402121	0.546034	1076.16
RchiOBHmChr7g0210161	265.692	470.464	562.777	1056.7
RchiOBHmChr3g0456481	2.62521	6.91079	60.7735	1055.48
RchiOBHmChr1g0361151	94.1515	84.2764	64.4459	1014.51
RchiOBHmChr4g0440991	0.10623	0.52338	0.403533	994.324
RchiOBHmChr1g0328041	35.7982	75.3105	105.444	857.499
RchiOBHmChr4g0441001	5.91094	1.25498	0.467594	775.093
RchiOBHmChr5g0068811	55.6744	52.1627	120.401	760.18
RchiOBHmChr1g0348091	324.359	432.234	976.055	760.07
RchiOBHmChr4g0389461	52.5579	52.7962	46.6144	720.491
RchiOBHmChr2g0133121	82.6484	68.6212	58.9	703.173
RchiOBHmChr1g0382811	0.244293	0.151853	0.486056	696.537
RchiOBHmChr6g0276971	0.693472	1.90787	13.8668	691.852
RchiOBHmChr1g0368491	98.2079	113.452	20.4087	685.897
RchiOBHmChr7g0192621	13.8487	35.6895	17.5298	664.605
RchiOBHmChr2g0142061	0.313652	0.416788	131.087	662.423
RchiOBHmChr1g0383321	21.8611	31.5278	62.5148	632.254
RchiOBHmChr7g0239891	20.875	14.112	7.82077	624.308
RchiOBHmChr7g0204981	25.8243	19.9995	20.4033	598.425
RchiOBHmChr1g0378071	4.84015	2.91492	6.25115	593.886
RchiOBHmChr2g0153111	35.2268	42.2775	243.839	587.528
RchiOBHmChr3g0461011	165.966	162.455	143.021	585.995
RchiOBHmChr6g0245601	250.119	248.786	732.897	557.16
RchiOBHmChr2g0138691	1.92496	1.03201	4.07224	547.192
RchiOBHmChr6g0294811	36.4566	58.4191	142.696	529.332
RchiOBHmChr7g0213921	23.5908	16.8033	38.5268	499.016
RchiOBHmChr6g0301491	13.937	27.2829	12.1178	488.506
RchiOBHmChr1g0383951	0.280856	0.140643	6.27823	486.032
RchiOBHmChr3g0460951	45.9823	40.582	62.7549	485.626
RchiOBHmChr3g0484171	0.203785	0.16909	0.281669	456.554
RchiOBHmChr3g0469861	105.912	203.778	242.864	440.599
RchiOBHmChr6g0303181	2.01752	0.987822	0.190453	439.546
RchiOBHmChr1g0316431	52.495	76.7623	174.041	432.25
RchiOBHmChr2g0152411	31.2509	56.0119	299.477	426.993
RchiOBHmChr3g0470071	6.57484	2.27608	39.4269	397.539
RchiOBHmChr6g0278431	48.3839	43.0439	113.959	383.615
RchiOBHmChr6g0247161	34.3681	23.8504	13.0793	379.441
RchiOBHmChr5g0060861	142.473	112.524	46.5876	378.93
RchiOBHmChr2g0109651	16.739	15.9236	27.4214	368.242
RchiOBHmChr5g0004591	0	1.04229	0.718805	364.704
RchiOBHmChr5g0073771	67.5246	87.7485	160.161	361.765
RchiOBHmChr2g0102831	71.9749	22.1879	190.428	356.186
RchiOBHmChr3g0469541	43.4629	19.4727	11.2048	351.048
RchiOBHmChr6g0249641	32.2579	40.7723	106.782	345.421
RchiOBHmChr3g0451251	1.79441	10.5656	11.6959	319.893
RchiOBHmChr3g0484161	0.0424611	0.16983	0.239124	306.687
RchiOBHmChr1g0375701	11.0532	9.07006	4.63177	279.179
RchiOBHmChr6g0257791	58.6915	11.6101	2.73485	273.627
RchiOBHmChr2g0173881	1.82	0.91634	5.10499	259.884
RchiOBHmChr1g0348141	0.0758913	0.146596	0.0843047	250.572
RchiOBHmChr6g0247671	0.231452	0.768265	2.04293	233.694
RchiOBHmChr4g0438411	17.299	22.1034	280.261	223.73
RchiOBHmChr3g0476791	96.2427	71.2721	31.0542	223.111
RchiOBHmChr4g0416811	18.1199	14.8967	17.9881	217.523
RchiOBHmChr2g0092311	8.85956	5.61259	20.8329	213.925
RchiOBHmChr1g0340941	57.2192	37.9997	10.6471	212.966
RchiOBHmChr5g0026101	22.3685	5.9048	1.77606	209.16
RchiOBHmChr4g0423771	0.49349	3.93243	1.61971	189.212
RchiOBHmChr2g0119391	0.609165	0.520414	2.2171	180.901
RchiOBHmChr2g0120311	25.2778	8.94839	18.3203	175.816
RchiOBHmChr7g0213861	0.108153	0.183637	6.92258	174.159
RchiOBHmChr4g0429311	19.1856	50.2967	58.0304	173.063
RchiOBHmChr6g0285121	8.91309	13.3905	6.62027	170.938
RchiOBHmChr7g0192601	3.14007	0.506559	3.38733	167.819
RchiOBHmChr2g0136391	3.15669	4.41006	4.67303	152.463
RchiOBHmChr3g0473581	0.226993	0.172205	0.0417371	149.565
RchiOBHmChr6g0286501	0.318079	0.432973	0.548893	148.553
RchiOBHmChr7g0202891	0.114263	0.0787662	0.204191	145.974
RchiOBHmChr5g0044071	37.9573	20.262	11.0215	140.547
RchiOBHmChr6g0289711	1.63827	0.815578	0.0875683	138.493
RchiOBHmChr7g0204941	6.62121	2.4867	1.75406	137.853
RchiOBHmChr2g0084361	10.9251	13.938	20.8405	136.932
RchiOBHmChr7g0227931	18.1798	26.1134	10.1443	127.218
RchiOBHmChr7g0213951	5.5828	15.3177	12.1085	122.416
RchiOBHmChr5g0014321	0.602205	0.553747	2.33503	121.932
RchiOBHmChr7g0214051	0.425522	1.30635	17.8179	117.335
RchiOBHmChr2g0142131	62.1971	52.6852	116.907	115.652
RchiOBHmChr7g0213971	0.0638322	0.0497128	0.424132	108.54
RchiOBHmChr2g0119621	5.97901	2.89835	0.955685	103.997
RchiOBHmChr2g0127101	14.0164	16.6703	16.9158	103.359
RchiOBHmChr4g0446831	1.72317	3.47193	11.293	103.049
RchiOBHmChr2g0138231	3.67305	2.11539	3.23295	99.7984
RchiOBHmChr2g0119351	1.05059	1.42123	1.30732	98.6242
RchiOBHmChr6g0257281	3.64596	3.81224	8.57841	96.1835
RchiOBHmChr3g0464841	0.0540764	0.231104	0.0473839	92.7593
RchiOBHmChr3g0459341	2.72983	1.92796	2.10617	92.6028
RchiOBHmChr6g0301061	12.2931	6.23923	6.04833	92.3097
RchiOBHmChr1g0383151	11.3017	0	0.04276	92.1608
RchiOBHmChr5g0063641	5.62873	4.22857	70.867	91.8651
RchiOBHmChr5g0051791	25.528	20.5691	31.8568	89.5934
RchiOBHmChr5g0067021	2.13303	2.45157	1.58739	89.3961
RchiOBHmChr3g0456401	0.936954	1.70625	0.296591	86.8514
RchiOBHmChr1g0325221	6.56492	5.76726	70.7057	85.4327
RchiOBHmChr1g0363161	43.2703	40.2713	61.9611	83.7332
RchiOBHmChr4g0393301	50.1082	43.9457	43.2417	82.3244
RchiOBHmChr1g0326041	2.05098	0.651396	0.392937	82.3099
RchiOBHmChr7g0177411	0.667008	0.277468	0.135611	81.8881
RchiOBHmChr6g0300211	0.195573	0.169249	0.612143	81.2353
RchiOBHmChr2g0135001	3.67796	2.45542	2.69832	81.0073
RchiOBHmChr3g0484271	0.131643	0	0.307738	79.0426
RchiOBHmChr6g0294071	52.8084	40.1949	70.9532	78.0995
RchiOBHmChr3g0453761	2.34786	0.883894	0.604753	77.6545
RchiOBHmChr5g0004351	20.0347	5.43888	0.500408	77.6415
RchiOBHmChr7g0187321	44.7029	30.1814	16.0398	75.6579
RchiOBHmChr2g0129041	11.3435	8.49742	26.8665	74.4117
RchiOBHmChr6g0302251	0.362139	0.497859	0.746078	68.3608
RchiOBHmChr1g0318501	1.41359	3.6318	2.27209	67.0063
RchiOBHmChr7g0233781	11.2868	19.8082	49.9561	65.6136
RchiOBHmChr1g0347201	6.86794	7.01155	12.0969	64.6004
RchiOBHmChr4g0415821	0.0259094	0.0102794	0.00926012	64.3546
RchiOBHmChr7g0181631	1.41223	0.503371	5.40585	64.1213
RchiOBHmChr7g0210851	1.10776	1.26647	4.5265	62.5591
RchiOBHmChr6g0299121	16.3323	4.56984	12.6068	62.036
RchiOBHmChr2g0120981	3.31277	7.73711	7.53423	59.2588
RchiOBHmChr4g0394191	7.50469	3.87737	1.74079	59.1011
RchiOBHmChr6g0256551	12.6764	18.3589	14.6619	57.6616
RchiOBHmChr1g0350321	7.64277	9.34585	11.1884	55.5558
RchiOBHmChr1g0333481	1.4389	0.982104	2.52176	54.4499
RchiOBHmChr1g0376511	39.3801	0	0.0183491	52.875
RchiOBHmChr5g0005311	14.7006	8.35386	2.27607	51.5898
RchiOBHmChr6g0278421	5.90441	5.78761	14.4718	48.6166
RchiOBHmChr5g0065871	0.398801	2.00621	5.73029	45.9822
RchiOBHmChr7g0233811	10.9876	18.2374	23.815	44.7755
RchiOBHmChr3g0484051	0	0.0275677	0.0132892	44.3994
RchiOBHmChr7g0210521	0.46203	0.309744	1.1256	44.1212
RchiOBHmChr7g0178831	15.8026	8.19942	1.14002	43.5962
RchiOBHmChr2g0112091	13.1785	13.3481	8.61708	40.5404
RchiOBHmChr2g0129821	1.86118	1.49422	2.48859	39.9501
RchiOBHmChr2g0127121	2.01598	11.7191	13.9649	38.8666
RchiOBHmChr7g0213981	0	0.018012	0.363988	38.1901
RchiOBHmChr3g0466961	1.47559	0.457826	1.12528	37.8652
RchiOBHmChr5g0080171	22.3796	12.5263	28.3125	35.7449
RchiOBHmChr1g0333571	2.10018	1.20244	2.29784	35.6953
RchiOBHmChr6g0252631	14.9142	1.31984	0.0410983	35.573
RchiOBHmChr2g0139421	12.2831	12.0409	13.1822	35.2845
RchiOBHmChr5g0012521	35.7081	3.03974	0.10872	34.5779
RchiOBHmChr5g0041291	0.265584	0.379709	0.130979	33.9924
RchiOBHmChr4g0391931	0.833608	0.503119	1.46898	32.6727
RchiOBHmChr1g0357131	0.0567469	0.625433	9.56504	31.696
RchiOBHmChr2g0147111	13.7666	0.606385	0.742729	31.5696
RchiOBHmChr7g0232641	0.222078	0.0773973	0.0143944	31.567
RchiOBHmChr5g0062641	0	0.00873	0.019084	31.5571
RchiOBHmChr3g0448771	0.0560548	0.177439	5.06024	31.2494
RchiOBHmChr6g0251271	3.65776	8.44692	0.881892	30.6464
RchiOBHmChr2g0153261	0.0294176	0	0.0257768	30.487
RchiOBHmChr2g0158821	0.5617	2.02266	7.12262	28.8998
RchiOBHmChr7g0217921	0.255973	1.44863	1.85605	28.4473
RchiOBHmChr2g0096741	0	0.0220461	1.03376	28.3849
RchiOBHmChr7g0180581	4.14376	4.18584	15.4322	27.2941
RchiOBHmChr4g0409611	12.7419	13.737	7.62556	26.7578
RchiOBHmChr2g0120131	1.46602	1.17457	1.95848	26.2981
RchiOBHmChr5g0009491	0.334759	0.371256	0.642228	24.9434
RchiOBHmChr4g0415351	2.41921	1.27275	1.12789	24.1986
RchiOBHmChr1g0343361	0.656092	0.0442216	0	24.0289
RchiOBHmChr3g0454321	1.59215	2.45738	20.3586	23.5923
RchiOBHmChr2g0153271	0.08382	0.0565464	0.060174	23.1492
RchiOBHmChr7g0183861	0.807095	0.905025	0.989825	22.3217
RchiOBHmChr2g0141631	4.33615	2.41017	3.8186	22.1248
RchiOBHmChr6g0276241	0.513597	2.00944	2.42081	21.5878
RchiOBHmChr2g0121251	0.323803	0.0801592	0.357806	20.7342
RchiOBHmChr4g0394531	0.472885	0.80766	4.69917	20.6279
RchiOBHmChr5g0027761	0.261976	0.370986	0.224358	20.5572
RchiOBHmChr2g0169521	2.37182	2.28215	4.48962	20.1895
RchiOBHmChr6g0268031	2.53222	6.28462	20.2257	19.6807
RchiOBHmChr4g0439931	0.0750322	0.0357526	0.2308	19.5643
RchiOBHmChr6g0266721	2.3129	2.06939	3.77758	19.3637
RchiOBHmChr3g0458401	4.23722	2.4016	0.982453	17.9011
RchiOBHmChr1g0364201	10.5503	1.64742	0.2468	17.7716
RchiOBHmChr2g0148501	0.186344	0.149255	0.0544275	17.5317
RchiOBHmChr4g0415371	0.306952	0.293817	0.347183	17.4922
RchiOBHmChr4g0433191	6.87844	3.77405	2.17984	16.7569
RchiOBHmChr4g0444461	3.27772	4.24399	10.0767	16.3554
RchiOBHmChr6g0266421	4.60023	2.17515	0.0860925	16.176
RchiOBHmChr3g0454791	0.845491	0.651215	0.245491	13.6446
RchiOBHmChr4g0426621	0.283827	1.39852	1.46614	13.1767
RchiOBHmChr5g0049691	3.83783	2.50024	7.05958	12.7184
RchiOBHmChr0c22g0500691	5.07693	3.03051	2.56136	12.6442
RchiOBHmChr3g0460991	2.06784	1.77141	0.0207281	12.5563
RchiOBHmChr5g0078791	0.587637	0.687553	1.01218	12.3227
RchiOBHmChr6g0265751	4.48144	3.57819	0.975043	12.0006
RchiOBHmChr7g0181731	1.83462	1.13296	0.544515	11.6676
RchiOBHmChr4g0425641	0.308814	0.184081	0.285696	11.4372
RchiOBHmChr5g0032481	0.371468	0.132973	0.0105298	10.7735
RchiOBHmChr6g0301551	5.04197	4.83909	1.78019	10.1811
RchiOBHmChr2g0122021	0.484316	0.308243	1.19512	10.135
RchiOBHmChr5g0004761	0.618308	0.0701262	0.0486491	9.72108
RchiOBHmChr4g0436001	0.494343	1.38984	2.7418	9.02689
RchiOBHmChr2g0156311	0.502369	0.851535	0.907433	8.95695
RchiOBHmChr2g0162781	1.4024	1.04862	0.68839	8.86043
RchiOBHmChr5g0002951	0.526225	1.78121	3.48908	8.45517
RchiOBHmChr7g0233771	1.08327	0.817874	3.77416	7.37599
RchiOBHmChr1g0357541	0.506652	0.409328	1.12505	7.3214
RchiOBHmChr6g0267121	0.499258	0.516206	0.269587	6.56137
RchiOBHmChr6g0247641	1.18393	0.746738	0.511911	6.39061
RchiOBHmChr5g0067011	1.52485	0.111055	0.0785872	6.32902
RchiOBHmChr3g0483681	3.12723	0.510471	0.113474	6.103
RchiOBHmChr1g0321821	4.35968	0.982559	0.594197	5.98298
RchiOBHmChr1g0356571	0.200783	0.0842651	0.0388035	5.44922
RchiOBHmChr7g0242341	0.648034	0.34418	1.4615	5.41849
RchiOBHmChr3g0491071	1.27616	1.67642	1.33172	4.78524
RchiOBHmChr2g0170961	2.30533	0.617297	0.369674	4.72415
RchiOBHmChr6g0251981	0.361088	0.387173	1.44932	4.60977
RchiOBHmChr7g0214951	0.46542	0.871445	1.18465	3.47916
RchiOBHmChr7g0210471	0.577731	0.680267	0.0669972	3.39782
RchiOBHmChr2g0142091	0	0	0.0148062	2.82965
RchiOBHmChr6g0251611	0.688825	0.619216	0.227159	2.78752
RchiOBHmChr2g0121561	0.27447	0.212806	0.397516	1.38752
RchiOBHmChr3g0486291	0.067248	0.0318004	0.0286471	1.11834
RchiOBHmChr5g0044981	4.99735	5.9568	5.30968	0.662092
