# Supplementary material for: Identification and Characterization of Transcription Factors Involved in Geraniol Biosynthesis in Rosa chinensis
Source: Int J Mol Sci. 2022 Nov 24;23(23):14684. doi: 10.3390/ijms232314684 (PMC9739587; doi:10.3390/ijms232314684)
Supplement: Supplementary file 1 [file ijms-23-14684-s001.zip › Table S10.xlsx]

## Sheet: Table S10
Table S10: DEGs information of the green-module in six organs of R.chinensis 'Old Blush'.
Gene_id	Leaf	Stem	Prickle	Stamen	PO	Root	Gene_description
RchiOBHmChr2g0142051	0	0	0	81.7375	13.8122	0.192234	Geranyl diphosphate phosphohydrolase
RchiOBHmChr2g0142071	0	0	0	10.0181	2.7843	0	Geranyl diphosphate phosphohydrolase
RchiOBHmChr2g0142081	0	0	0	151.712	27.1503	0.358077	Geranyl diphosphate phosphohydrolase
RchiOBHmChr2g0142111	0	0.0380399	0.0306349	234.148	36.2504	0.232311	Geranyl diphosphate phosphohydrolase
RchiOBHmChr1g0373641	10.34	17.3721	14.5579	67.3724	59.8982	23.8424	Putative transcription factor AP2-EREBP family
RchiOBHmChr1g0363241	10.779	3.47059	4.82258	10.8965	13.831	12.7235	Putative transcription factor ARF family
RchiOBHmChr1g0337011	12.2893	2.28212	3.63471	46.7713	16.0648	0.243701	Putative transcription factor bHLH family
RchiOBHmChr6g0257641	132.8	138.326	74.6844	11.3033	65.791	228.352	Putative transcription factor bZIP family
RchiOBHmChr2g0088491	0.721504	3.08212	1.08363	2.11019	1.95348	0.43682	Putative transcription factor C2H2 family
RchiOBHmChr4g0434111	5.6981	17.6062	55.78	6.87012	8.66165	8.30169	Putative transcription factor C2H2 family
RchiOBHmChr3g0455241	0	0.108595	0.0233157	0.449856	2.52484	1.46922	Putative transcription factor Hap3/NF-YB family
RchiOBHmChr4g0389611	308.495	31.3815	14.7301	19.5806	2.57703	11.7464	Putative transcription factor interactor and regulator AUX-IAA family
RchiOBHmChr4g0393021	1.86372	14.2419	34.8605	58.2593	6.23148	8.03812	Putative transcription factor interactor and regulator CCHC(Zn) family
RchiOBHmChr2g0143591	4.04822	2.36907	1.44836	2.79599	3.97587	6.5427	Putative transcription factor interactor and regulator FHA-SMAD family
RchiOBHmChr2g0149701	75.2042	4.22701	5.36447	3.85314	0.6999	0.00992338	Putative transcription factor interactor and regulator Znf-B family
RchiOBHmChr2g0116041	0.655227	0.922695	2.72512	28.1143	6.2758	0	Putative transcription factor MYB-HB-like family
RchiOBHmChr7g0228621	2.98916	16.564	30.5295	586.356	112.694	130.379	Putative transcription factor MYB-HB-like family
RchiOBHmChr7g0241861	4.54454	2.27083	4.20894	0.374331	4.27584	0.0180873	Putative transcription factor MYB-HB-like family
RchiOBHmChr4g0429461	320.119	126.761	106.118	112.257	124.45	185.629	Putative transcription factor NAM family
RchiOBHmChr4g0437871	18.6531	18.2627	20.4229	2.6994	51.3012	4.99068	Putative transcription factor SBP family
RchiOBHmChr2g0170351	7.56112	101.605	72.0337	93.2709	65.4136	72.895	Putative transcription regulator A20-like family
RchiOBHmChr5g0004761	3.68523	0.423225	1.19759	0.497878	5.19016	0.493882
RchiOBHmChr1g0383951	0.0310071	0.271035	1.17048	1.19457	0.742825	1.94058
RchiOBHmChr1g0343361	0.699541	0.0383746	0.597445	0.0333785	0.899577	1.41606
RchiOBHmChr1g0347201	5.26686	2.41395	1.57323	21.9383	6.14968	9.41156
RchiOBHmChr1g0357131	0	0	0	3.46636	0	0
RchiOBHmChr1g0357541	0.244517	0.0633692	0.188783	3.82078	0.767819	0
RchiOBHmChr1g0382801	0.054853	5.10463	10.557	386.99	132.29	11.805
RchiOBHmChr1g0382811	0	0.114531	0.0904514	488.475	30.4829	0.298147
RchiOBHmChr1g0383321	116.022	46.3465	172.736	290.24	41.0866	145.065
RchiOBHmChr2g0084361	2.93635	5.34444	5.1048	51.5577	25.0902	63.9348
RchiOBHmChr2g0096741	0.0336817	0.225464	1.00134	10.9283	0.89612	1.71272
RchiOBHmChr2g0121251	0	0.251257	0.10932	0.717982	0	0.168895
RchiOBHmChr2g0121561	0.0210767	0.218592	0.0641479	0.966036	0.615681	0.0176204
RchiOBHmChr2g0127121	2.60755	5.98288	15.2686	24.8643	13.7716	29.7754
RchiOBHmChr2g0129821	0.175708	0.988999	0.568294	0.515545	1.03543	0.546888
RchiOBHmChr2g0142091	0	0.538312	0.010182	0.666514	0.217267	2.59065
RchiOBHmChr2g0159041	13.7196	36.4052	23.7896	1103.33	597.618	9.13586
RchiOBHmChr2g0162781	1.00662	1.25288	0.993086	5.20041	2.23588	1.5625
RchiOBHmChr2g0170961	1.20786	0.439663	1.19265	1.17368	0.47793	0.251608
RchiOBHmChr3g0448771	0	0.38289	0.0685255	0	0.249763	0.487286
RchiOBHmChr3g0454321	2.47016	2.7349	0.422962	18.7684	12.4521	2.34992
RchiOBHmChr3g0459341	39.8719	9.01623	16.4025	0.316357	13.5874	8.48606
RchiOBHmChr3g0460991	6.8189	1.43168	0.149518	0.246888	4.44453	16.1894
RchiOBHmChr3g0473581	12.6241	5.43265	17.3496	2.29088	1.2852	1.11221
RchiOBHmChr3g0483681	1.54003	0.268291	0.207891	0.213633	0.634445	0.478851
RchiOBHmChr3g0486291	0.658997	0.569512	0.366799	0.202412	0.382562	0.911292
RchiOBHmChr4g0394531	0.417211	0.452205	1.04022	10.1388	5.0613	0.126704
RchiOBHmChr4g0415821	1.34856	0.969077	19.8565	0.616334	27.0811	1.05483
RchiOBHmChr4g0426621	13.9883	6.52715	4.37374	9.29472	6.60312	5.84264
RchiOBHmChr4g0435971	1841.13	56.2986	44.4506	270.836	104.086	5.62511
RchiOBHmChr4g0439931	19.1947	2.80126	1.28392	2.77995	6.66898	0.00673413
RchiOBHmChr4g0444461	1.45319	3.10451	1.6801	0.452056	1.4778	21.7247
RchiOBHmChr5g0002951	6.31118	1.21775	0.66735	1.92205	1.76577	0.75548
RchiOBHmChr5g0014321	1.98263	1.89243	1.53252	19.3622	3.34827	0.377562
RchiOBHmChr5g0027761	8.30127	0.919614	4.23515	0	1.89192	22.4028
RchiOBHmChr5g0041291	39.0642	17.923	1.19981	1.42312	5.35265	43.889
RchiOBHmChr5g0044981	2.13975	5.85393	8.51357	5.41447	3.37394	1.35984
RchiOBHmChr5g0049691	1.2713	1.65317	3.14095	4.5053	2.83228	1.31925
RchiOBHmChr5g0063641	4.8865	6.09692	4.44764	100.052	32.9548	38.3521
RchiOBHmChr5g0080171	2.20889	0.692142	0.710051	26.1541	8.55482	0.62955
RchiOBHmChr6g0247671	60.9548	0.0483466	33.5301	7.67696	7.932	28.7354
RchiOBHmChr6g0256551	40.6948	21.1137	43.261	34.2528	37.9085	53.7706
RchiOBHmChr6g0278431	118.516	172.072	241.651	197	115.735	383.757
RchiOBHmChr6g0303181	17.0841	0.764166	1.02296	10.7991	1.69045	14.6408
RchiOBHmChr7g0202891	10.8328	0	0.0592046	0.570031	18.9982	0
RchiOBHmChr7g0210471	1.95837	1.253	0.246045	0.956517	1.31855	0.180212
RchiOBHmChr7g0210521	1.73389	0.0435456	0	0.0884156	0.213025	0.166489
RchiOBHmChr7g0213921	19.1848	25.0535	24.2275	121.04	35.6094	49.4101
RchiOBHmChr7g0214951	0.0263596	0.0239152	0	1.71719	0.0233468	0
RchiOBHmChr3g0469861	14.4214	239.567	218.345	1.68742	119.144	24.6502
RchiOBHmChr7g0187321	0.0770692	0.171747	6.37636	9.96096	39.3711	2.61082
RchiOBHmChr6g0301491	15.7907	158.383	0	20.7966	35.9906	6.15981
RchiOBHmChr2g0130851	486.805	71.387	58.2649	34.2531	65.6588	36.3164
RchiOBHmChr6g0268031	9.52726	3.42519	3.75868	12.9749	8.70458	7.29583
RchiOBHmChr5g0065871	45.0732	1.81975	0.158407	28.0188	10.6695	2.10031
RchiOBHmChr1g0375701	5.17984	67.39	43.9252	16.1505	12.4785	1.74006
RchiOBHmChr6g0266421	6.03786	9.91467	5.88807	0.404228	3.38895	0
RchiOBHmChr4g0389461	1.75664	1.48915	2.79445	3.62297	20.976	0.093077
RchiOBHmChr5g0002761	595.946	95.3314	73.0323	541.389	160.841	222.353
RchiOBHmChr7g0213951	7.31532	0.415433	1.85965	0.159998	0.164038	0
RchiOBHmChr7g0214051	7.48748	0.610484	1.34375	1.17966	0.649135	0
RchiOBHmChr4g0393301	83.4951	33.7194	60.2136	5.39795	36.7119	2.09804
RchiOBHmChr6g0257281	29.8943	21.197	41.6061	74.7212	42.5148	52.711
RchiOBHmChr5g0004591	0	0	0.812567	7.95943	0.615824	0
RchiOBHmChr7g0232341	649.555	171.297	1.16729	1007.28	771.436	219.776
RchiOBHmChr2g0120131	0.640636	9.36269	6.11974	15.0618	4.93285	14.6389
RchiOBHmChr2g0153261	1.3794	0.0209372	0	1.82597	0.163362	11.0763
RchiOBHmChr7g0233781	5.52324	19.8243	15.249	22.8532	18.9189	6.88258
RchiOBHmChr2g0133121	53.7157	45.9629	28.5259	20.3663	81.3157	53.4091
RchiOBHmChr2g0169521	9.708	4.02218	16.4212	16.1029	15.2314	8.77615
RchiOBHmChr6g0301551	1.23073	1.67076	1.58433	2.83233	4.31181	10.906
RchiOBHmChr2g0148501	2.2442	4.48849	1.91281	8.77728	13.6782	0
RchiOBHmChr6g0289711	18.3145	13.5434	0.730632	12.2677	2.16035	0
RchiOBHmChr6g0245601	68.1782	68.4311	52.0674	856.081	248.944	42.0497
RchiOBHmChr7g0192601	0.608159	0.869194	1.65704	13.3344	7.99354	0.435087
RchiOBHmChr3g0458401	8.09294	4.64473	3.09577	2.57911	8.73037	13.1961
RchiOBHmChr4g0387801	21.5766	0.127666	1.57283	70.8638	9.84319	0
RchiOBHmChr6g0286501	0.0296885	0.0606616	0.0271609	8.04091	1.42267	0
RchiOBHmChr7g0210161	244.482	245.051	404.493	60.9815	203.727	331.05
RchiOBHmChr4g0409611	1.00134	2.85412	1.76597	17.604	12.0678	2.67525
RchiOBHmChr6g0252631	1.83727	19.137	0.701285	12.982	16.4102	0.665069
RchiOBHmChr5g0073771	7.8721	5.90021	2.82803	244.74	16.9977	35.4282
RchiOBHmChr4g0391931	0.0217385	0.487518	0.0675642	0.303862	0.1435	32.3856
RchiOBHmChr7g0213981	24.5347	0	0	5.92886	1.23196	0
RchiOBHmChr4g0446831	10.8799	27.0633	68.0309	37.2353	53.2057	1.2867
RchiOBHmChr3g0464841	10.4988	0.522807	0.264428	0.575326	3.54799	0
RchiOBHmChr1g0383151	0.0677596	1.29256	0	3.57441	5.70986	0.375045
RchiOBHmChr2g0102831	49.0868	55.6653	36.6765	70.9705	207.578	51.4357
RchiOBHmChr1g0348091	365.625	512.173	208.57	1126.02	574.47	154.18
RchiOBHmChr5g0039691	248.028	100.261	29.1044	817.125	295.149	30.091
RchiOBHmChr7g0204941	51.5862	11.7178	11.1303	8.88163	25.2817	3.81273
RchiOBHmChr2g0119621	124.602	0.964505	0.907709	16.8099	36.9903	15.3979
RchiOBHmChr7g0213971	48.4268	0.126524	0.0123496	22.459	3.53121	0.825388
RchiOBHmChr1g0363161	24.7801	41.8887	38.0391	38.4074	53.6963	29.4099
RchiOBHmChr2g0142131	27.4481	29.1429	24.7822	90.8968	50.817	56.7755
RchiOBHmChr2g0129041	18.4789	4.6	1.77232	17.8594	11.5466	9.77027
RchiOBHmChr1g0360721	4.6367	32.3517	0.156349	486.238	588.163	6.95619
RchiOBHmChr2g0153271	3.00678	0.232105	0.0691886	7.18553	0.585906	11.878
RchiOBHmChr6g0302251	7.56565	1.97268	4.3712	10.1033	10.0715	28.5712
RchiOBHmChr5g0009491	0	0.256583	0	0.059439	1.17436	0.226236
RchiOBHmChr7g0239891	94.7541	61.3204	35.724	24.1171	30.7859	220.67
RchiOBHmChr3g0484051	0.841121	1.3721	8.78326	0.755051	22.5995	14.6203
RchiOBHmChr3g0484161	1.94651	11.6332	23.3022	1.46548	13.8678	0.449046
RchiOBHmChr3g0484171	2.96926	17.0616	37.1244	2.1157	20.4426	1.38943
RchiOBHmChr1g0376511	0	0	0.0240055	3.27893	18.7712	0.269179
RchiOBHmChr3g0488551	0.318991	1.24736	54.1654	1.8419	1.76077	0
RchiOBHmChr1g0333481	4.98456	1.31009	1.40042	0.974278	1.2591	5.4369
RchiOBHmChr1g0333571	8.0083	1.81972	2.83612	0.787942	2.30263	20.0973
RchiOBHmChr5g0077961	0.536637	124.183	11.1662	2023.11	302.582	7365.48
RchiOBHmChr4g0429311	60.5391	33.4002	39.8138	36.7539	20.8177	244.772
RchiOBHmChr1g0321821	3.03198	2.38075	2.21971	2.4492	4.95974	0.255743
RchiOBHmChr6g0274441	9.87672	5.21769	16.475	44.7919	4.20261	15.1318
RchiOBHmChr4g0440991	60.6551	0.235038	0.654504	2.21563	55.7921	108.916
RchiOBHmChr4g0441001	305.38	32.1441	81.554	3.77174	76.9372	477.338
RchiOBHmChr4g0441041	0.150603	0	0	1.38033	0.54531	485.935
RchiOBHmChr3g0470071	42.6832	33.2197	14.8137	32.9462	88.1732	42.2988
RchiOBHmChr5g0067011	4.15075	1.95146	0.135491	2.14372	0.95515	0.756058
RchiOBHmChr7g0183861	0.528689	1.12118	0.132168	11.7813	1.59707	0.124335
RchiOBHmChr2g0142121	0	0.311565	0.250915	1963.43	212.804	1.90527
RchiOBHmChr4g0394191	8.89694	2.84576	0	0.813013	14.7597	4.75386
RchiOBHmChr3g0484271	2.21966	0.135287	0	2.32616	0.264876	0.393447
RchiOBHmChr2g0119351	32.4822	4.88576	14.9029	17.6783	4.61074	6.11397
RchiOBHmChr7g0198901	241.131	178.441	323.74	2353.28	902.712	2257.48
RchiOBHmChr6g0251981	1.65037	0.754947	1.45093	0.798324	1.25962	1.26213
RchiOBHmChr6g0249641	22.4002	25.0799	22.3267	240.694	46.7638	51.7099
RchiOBHmChr7g0233811	10.5684	10.5335	7.15334	5.44759	10.8963	4.11098
RchiOBHmChr5g0059511	0.0481972	0.0547521	1.96062	2121.96	652.108	3.29393
RchiOBHmChr2g0173881	3.6671	58.052	46.1363	14.913	39.9733	5.0461
RchiOBHmChr5g0062641	0.411826	1.5537	0.0262476	16.1728	0.356225	16.0544
RchiOBHmChr6g0247161	37.9709	11.7237	9.81659	5.95205	122.08	11.3933
RchiOBHmChr3g0469541	400.485	16.4719	6.31019	55.342	28.615	520.764
RchiOBHmChr2g0138231	11.9913	6.96743	3.56718	49.9727	5.3062	34.6499
RchiOBHmChr1g0326041	0	0.747608	0.814664	0.0826696	0	0.435778
RchiOBHmChr2g0158821	0.474823	4.0347	3.14715	15.0015	2.33129	0.790914
RchiOBHmChr7g0178831	8.66584	0	0.0715808	5.64455	25.4102	0
RchiOBHmChr1g0378071	47.5381	6.21377	2.22694	21.5749	36.5772	78.103
RchiOBHmChr2g0112071	562.876	9.82951	21.9575	586.94	112.39	348.325
RchiOBHmChr7g0232641	13.5137	3.22034	0.0313022	1.69663	2.45897	4.43341
RchiOBHmChr2g0139421	3.44102	5.35893	5.70024	2.1201	4.72157	6.09818
RchiOBHmChr1g0316461	15.4721	918.934	1003.87	18.4738	376.181	60.1942
RchiOBHmChr4g0415371	1.42582	1.24379	1.0297	0.55797	1.35975	3.99618
RchiOBHmChr4g0416811	57.4472	95.0606	45.675	29.0066	54.6915	45.2133
RchiOBHmChr6g0276971	32.8139	85.3831	464.941	356.48	111.93	722.77
RchiOBHmChr1g0364201	0.834592	0.777708	0.502152	4.04627	2.23678	6.22865
RchiOBHmChr7g0177411	7.05254	17.7584	47.652	59.6177	20.6511	94.7008
RchiOBHmChr7g0189511	125.619	0.569486	3.19629	48.4458	3.63227	47.0701
RchiOBHmChr1g0325221	3.65763	2.69016	1.89068	20.404	13.4595	102.238
RchiOBHmChr1g0348141	1.56564	0.33196	0.196612	2.18668	0.496167	0.491688
RchiOBHmChr2g0109651	127.76	35.5849	128.637	11.623	29.6008	77.2429
RchiOBHmChr2g0119391	27.0962	4.08714	15.9963	46.177	4.2167	44.1365
RchiOBHmChr5g0044071	5.92538	2.71533	0.237996	1.03515	13.7987	0
RchiOBHmChr7g0192621	140.396	65.5071	56.8312	128.547	64.2793	97.0896
RchiOBHmChr1g0328041	32.8353	62.2255	89.8457	60.0563	122.855	2.45328
RchiOBHmChr3g0458761	382.291	961.372	1237.04	512.137	1064.79	63.4541
RchiOBHmChr6g0276241	5.69284	2.1131	1.34987	0.17109	1.15432	0.443532
RchiOBHmChr7g0217921	0.468257	0.212776	1.18209	1.06022	1.32839	0.103671
RchiOBHmChr5g0051791	69.7017	39.1166	50.9494	10.2961	12.5948	1.76325
RchiOBHmChr3g0451251	0	0.0739307	0	9.65288	0.28906	31.4839
RchiOBHmChr6g0299121	10.1516	3.38027	2.36527	34.9872	33.7651	0.0723561
RchiOBHmChr5g0068811	384.752	75.86	94.2417	26.8606	166.709	1.20047
RchiOBHmChr5g0031161	450.039	320.547	241.895	1196.82	764.27	559.137
RchiOBHmChr3g0456481	2.90123	12.3144	3.68091	103.785	6.18954	8.40922
RchiOBHmChr6g0278421	10.9635	14.9483	20.0664	16.9979	9.68223	31.187
RchiOBHmChr6g0284551	148.037	119.753	165.72	825.117	176.853	297.095
RchiOBHmChr2g0135001	8.14664	3.00696	3.2497	1.82823	6.05977	10.3325
RchiOBHmChr4g0433191	0.209029	1.17722	0.848358	0.922726	3.23542	8.17399
RchiOBHmChr1g0340941	25.3427	1.61182	0	14.6513	13.6854	3.01848
RchiOBHmChr6g0294811	34.515	220.359	60.376	39.8556	67.9908	1.11085
RchiOBHmChr3g0460951	520.883	185.769	145.489	120.555	166.305	228.099
RchiOBHmChr3g0476791	161.297	34.0971	77.4207	5.82509	63.7581	3.51676
RchiOBHmChr5g0004351	45.9351	14.2439	14.7199	1.1232	9.75961	1.23819
RchiOBHmChr5g0005311	42.2338	2.63271	4.50479	0.388441	4.91182	0.692075
RchiOBHmChr4g0415351	4.15673	3.68819	2.48544	1.27418	3.58269	8.59991
RchiOBHmChr5g0032481	0.712233	0.464717	1.48487	0.698765	1.84386	2.53043
RchiOBHmChr1g0356571	4.84242	1.09811	0.28999	0	0.781429	0.984776
RchiOBHmChr3g0454791	1.66009	1.081	2.5483	0.132737	1.58458	0.582824
RchiOBHmChr0c22g0500691	2.5566	2.79355	3.71379	6.81852	5.46373	2.44023
RchiOBHmChr5g0078791	3.34384	4.95244	2.37412	0.098283	1.58497	0.0215236
RchiOBHmChr6g0300211	5.9629	17.68	8.07171	12.9496	1.79996	54.3359
RchiOBHmChr4g0423771	79.4895	4.19715	0.247792	1.38844	1.74275	173.788
RchiOBHmChr7g0180581	10.654	3.74727	0.0743888	11.607	7.04548	20.7075
RchiOBHmChr2g0152501	387.459	85.8411	33.0789	2254.35	1571.11	11.229
RchiOBHmChr3g0462531	117.057	350.206	96.0202	22.6925	155.028	92.4067
RchiOBHmChr2g0122021	0.226294	0.188964	0.221878	0.120484	0.295272	0
RchiOBHmChr1g0368491	285.287	3.95623	5.98034	35.4752	10.0092	12.3563
RchiOBHmChr6g0251271	20.6388	4.69179	9.53159	4.74905	0.673161	4.9329
RchiOBHmChr2g0147111	23.0054	2.05059	0.895311	0.0385791	3.04579	0
RchiOBHmChr7g0204981	120.686	63.1821	189.699	45.3274	34.2542	0.144638
RchiOBHmChr7g0210851	5.95031	0.258271	0.241848	11.4004	0.5828	0.0857588
RchiOBHmChr6g0294071	17.3225	23.482	18.7694	87.9769	42.9729	30.1271
RchiOBHmChr3g0466961	5.40584	0.673665	0.900221	9.26594	2.87646	2.96279
RchiOBHmChr2g0127101	22.8707	4.02813	8.71158	9.15627	2.30577	2.7778
RchiOBHmChr3g0461011	278.537	135.32	107.187	112.858	201.736	317.348
RchiOBHmChr6g0285121	5.66606	6.32422	17.6597	29.2454	9.36855	31.6643
RchiOBHmChr7g0181731	0.688908	1.53447	1.20003	0.341004	1.72737	0.812473
RchiOBHmChr2g0100891	17.131	27.6892	0	1194.94	547.605	65.8337
RchiOBHmChr5g0060861	54.1572	19.6017	0.96269	114.923	25.9149	5.29837
RchiOBHmChr5g0026101	67.5817	26.5607	10.354	7.38821	24.0438	1.72297
RchiOBHmChr6g0251611	1.05637	2.21872	0.0976235	1.38065	0.455195	2.291
RchiOBHmChr2g0152411	12.5803	26.3251	39.0558	132.899	36.4677	29.3879
RchiOBHmChr6g0310241	75.1982	59.0341	177.66	604.604	112.691	489.193
RchiOBHmChr2g0138691	444.427	54.3533	36.2672	32.6027	51.8543	36.1981
RchiOBHmChr4g0425641	11.8421	3.02955	3.20491	1.29168	2.59739	0.75803
RchiOBHmChr5g0012521	16.759	1.15355	0.367021	0.142508	24.9504	0.878787
RchiOBHmChr7g0213861	0.0638088	0	0.247963	38.1013	4.62737	1.15018
RchiOBHmChr7g0213931	1.09114	2.9982	2.10739	1762.43	204.515	115.903
RchiOBHmChr4g0438411	19.1383	31.9948	23.3981	294.096	131.573	23.6348
RchiOBHmChr1g0318501	3.1795	11.6041	1.2118	49.0699	7.95665	8.50898
RchiOBHmChr1g0350321	25.14	7.07214	7.79667	32.1463	19.8789	28.4919
RchiOBHmChr2g0153111	2.29594	1.53229	1.63362	371.289	158.341	0.34957
RchiOBHmChr2g0152071	0.286545	4.7748	0.165993	395.772	25.6367	4.09629
