# Supplementary material for: Identification and Characterization of Transcription Factors Involved in Geraniol Biosynthesis in Rosa chinensis
Source: Int J Mol Sci. 2022 Nov 24;23(23):14684. doi: 10.3390/ijms232314684 (PMC9739587; doi:10.3390/ijms232314684)
Supplement: Supplementary file 1 [file ijms-23-14684-s001.zip › Table S11.xlsx]

## Sheet: Table S11
Table S11: Primer sequences used in this study.
Primer name	Forward primer	Reverse primer
qPCR-RcHMGCR-F/R	TAACAGAGAGGCACCAGGAG	AGCAGCGATAGCAGACATAAGT
qPCR-RcGGPPS-F/R	TCTCTCCACCTCCTCCACAG	GCTCCTTCACAGTCTCCTGC
qPCR-RcNUDX1-F/R	AGTGGCGGTGGTAGTATGC	CAGTTTCTTCCTTCAGTTCCCT
qPCR-RcG8H-F/R	ATGCCAACCACGCCA	TCCGACATCTACTGCCTCAC
qPCR-RcCYP82D47-F/R	AATCGGAGGTGAAGGTGTCTA	TCCAACAACCATCCTGAGC
qPCR-RcWRKY70-F/R	GATGGTCAGGCTTGGAGAA	ACTTGTTTGGTTGCTTGGC
qPCR-RcACTIN-F/R	CAATGCTCCCGCTATGTATG	AGGTCAAGTCGCAGAATGG
proRcNUDX1-F/R	CGGTGTATATCTTAGATTAGC	GATAATTGGAACGCCTTCATGT
pAbAi-FWR-F/R	AAGCTTGTGATCAAGTCAATGATAAAGT	GTCGACCCTGATCATTGACTTTAGTATTG
RcWRKY70-F/R	ATGGCTACAACTTGGCTTGAAG	CTAGGGGCCTAAAGGAAATGCAGC
NL-RcWRKY70-F/R	GGTACCATGGCTACAACTTGGCTTGAAG	CTCGAGGGGGCCTAAAGGAAATGCAGC
AD-RcWRKY70-F/R	CATATGATGGCTACAACTTGGCTTGAAG	GGATCCCTAGGGGCCTAAAGGAAATGC
SK-RcWRKY70-F/R	TCTAGAATGGCTACAACTTGGCTTGAAG	GGTACCCTAGGGGCCTAAAGGAAATGCAGC
LUC-proRcNUDX1-F/R	AAGCTTCGGTGTATATCTTAGATTAGC	GGATCCGATAATTGGAACGCCTTCATGT
